# Supplementary material for: Targeted modulation of phosphate and lipid metabolism reduces ligament mineralization in col9a1b knockout models
Source: Research Square preprint supplement (doi:10.21203/rs.3.rs-7082517/v1), 2025-07-22
Supplement: Supplementary file 1 [file 19cb2cfe7ced692ec53e0a64.xlsx]

## Sheet: 15dpf DEGS
gene_id	col9_15dpf_1	col9_15dpf_2	wt_15dpf_1	wt_15dpf_2	col9_15dpf	wt_15dpf	log2FoldChange	pvalue	padj	gene_name	gene_chr	gene_start	gene_end	gene_strand	gene_length	gene_biotype	gene_description	tf_family	col9_15dpf_1_count	col9_15dpf_2_count	wt_15dpf_1_count	wt_15dpf_2_count	col9_15dpf_1_fpkm	col9_15dpf_2_fpkm	wt_15dpf_1_fpkm	wt_15dpf_2_fpkm
ENSDARG00000005221	211.958	567.189	0	0	389.574	0	11.0621	1.71911e-09	4.97881e-08	desmb	6	13871641	13891727	-	2252	protein_coding	desmin b [Source:ZFIN;Acc:ZDB-GENE-061027-102]	Filament	198	607	0	0	2.58784	6.93722	0	0
ENSDARG00000044976	256.919	200.899	0	0	228.909	0	10.2939	3.8526e-12	1.60062e-10	krt93	11	11454545	11458208	-	1622	protein_coding	keratin 93 [Source:ZFIN;Acc:ZDB-GENE-060421-4592]	Filament	240	215	0	0	4.35513	3.41156	0	0
ENSDARG00000075027	180.914	216.784	0	0	198.849	0	10.0924	1.13631e-11	4.50717e-10	fgfr1bl	22	6962924	6968756	-	1168	protein_coding	fibroblast growth factor receptor 1b, like [Source:ZFIN;Acc:ZDB-GENE-091204-406]	I-set	169	232	0	0	4.25877	5.11223	0	0
ENSDARG00000016318	179.843	99.9823	0	0	139.913	0	9.5827	2.5676e-10	8.53074e-09	med7	14	34064249	34065937	+	1073	protein_coding	mediator complex subunit 7 [Source:ZFIN;Acc:ZDB-GENE-030131-4823]	MED7	168	107	0	0	4.6084	2.56655	0	0
ENSDARG00000079589	149.869	71.0155	0	0	110.442	0	9.24109	1.87287e-09	5.3885e-08	si:dkeyp-73d8.6	2	32621677	32624577	-	1710	protein_coding	si:dkeyp-73d8.6 [Source:ZFIN;Acc:ZDB-GENE-070912-683]	-	140	76	0	0	2.40975	1.14389	0	0
ENSDARG00000105265	105.979	107.458	0	0	106.718	0	9.19391	1.43615e-09	4.23782e-08	zgc:171534	13	330611	337318	-	2469	protein_coding	zgc:171534 [Source:ZFIN;Acc:ZDB-GENE-080218-6]	-	99	115	0	0	1.1802	1.19879	0	0
ENSDARG00000100614	319.008	210.243	0	1.01876	264.626	0.509381	9.05971	7.5946e-10	2.33545e-08	zgc:171497	KN150335.1	11961	25876	-	2241	protein_coding	zgc:171497 [Source:ZFIN;Acc:ZDB-GENE-080220-58]	-	298	225	0	1	3.91395	2.58408	0	0.0125325
ENSDARG00000042130	324.36	358.815	0.963361	1.01876	341.588	0.991062	8.43053	1.49841e-15	9.13865e-14	zp3a.2	20	33987465	33989427	+	1429	protein_coding	zona pellucida glycoprotein 3a, tandem duplicate 2 [Source:ZFIN;Acc:ZDB-GENE-040727-2]	Zona_pellucida	303	384	1	1	6.24096	6.91615	0.0185283	0.0196538
ENSDARG00000103034	319.008	322.373	0.963361	1.01876	320.69	0.991062	8.33911	3.27826e-15	1.90898e-13	CABZ01068499.1	16	49005321	49017878	+	645	protein_coding	-	SCP	298	345	1	1	13.5987	13.7665	0.0410495	0.043543
ENSDARG00000103538	82.4282	28.9668	0	0	55.6975	0	8.25265	3.73043e-07	7.30571e-06	BX571954.2	4	52991210	52996838	-	2366	lincRNA	-	-	77	31	0	0	0.957893	0.337219	0	0
ENSDARG00000087012	39.6084	63.5402	0	0	51.5743	0	8.14655	3.83612e-07	7.46317e-06	BX004816.2	3	3046909	3072467	+	5782	protein_coding	-	-	37	68	0	0	0.188349	0.302689	0	0
ENSDARG00000103498	76.0052	170.998	0.963361	0	123.502	0.481681	7.96558	1.69749e-07	3.57028e-06	epd	5	37837245	37839310	+	890	protein_coding	ependymin [Source:ZFIN;Acc:ZDB-GENE-980526-111]	-	71	183	1	0	2.34806	5.29208	0.0297494	0
ENSDARG00000109460	56.7363	30.8357	0	0	43.786	0	7.90635	1.34204e-06	2.33763e-05	CR762420.1	KN149685.1	52649	59470	-	6822	protein_coding	-	-	53	33	0	0	0.228668	0.124499	0	0
ENSDARG00000023648	840.339	1144.66	7.70689	1.01876	992.498	4.36283	7.81683	1.04088e-16	7.35165e-15	idh3g	23	25121998	25135105	-	2545	protein_coding	isocitrate dehydrogenase 3 (NAD+) gamma [Source:ZFIN;Acc:ZDB-GENE-050417-435]	-	785	1225	8	1	9.07868	12.3884	0.0832281	0.0110355
ENSDARG00000104113	36.3969	39.2454	0	0	37.8211	0	7.69762	3.00002e-06	4.81919e-05	zgc:136767	3	6325895	6351893	+	1784	protein_coding	zgc:136767 [Source:ZFIN;Acc:ZDB-GENE-060421-7499]	zf-B_box	34	42	0	0	0.560951	0.605926	0	0
ENSDARG00000104004	135.953	66.3434	0.963361	0	101.148	0.481681	7.67302	5.4969e-07	1.03575e-05	si:dkey-146c18.2	4	61994037	61999681	+	2366	protein_coding	si:dkey-146c18.2 [Source:ZFIN;Acc:ZDB-GENE-131118-16]	-	127	71	1	0	1.5799	0.772341	0.0111906	0
ENSDARG00000071553	29.9739	38.311	0	0	34.1424	0	7.55067	6.21606e-06	9.29015e-05	zgc:171500	22	6932299	6941098	-	1795	protein_coding	zgc:171500 [Source:ZFIN;Acc:ZDB-GENE-080204-9]	I-set	28	41	0	0	0.459129	0.587875	0	0
ENSDARG00000054755	35.3264	32.7045	0	0	34.0154	0	7.54399	6.22241e-06	9.29329e-05	alox5ap	10	36458563	36463715	+	1304	protein_coding	arachidonate 5-lipoxygenase-activating protein [Source:ZFIN;Acc:ZDB-GENE-030131-9322]	-	33	35	0	0	0.744864	0.690805	0	0
ENSDARG00000024740	25.6919	42.0486	0	0	33.8703	0	7.54002	7.15857e-06	0.000104981	gng13a	1	9227081	9228007	-	573	protein_coding	guanine nucleotide binding protein (G protein), gamma 13a [Source:ZFIN;Acc:ZDB-GENE-081022-188]	-	24	45	0	0	1.23281	2.02126	0	0
ENSDARG00000093438	22.4804	34.5733	0	0	28.5269	0	7.29212	2.16649e-05	0.00027854	CU467110.1	1	8974500	8977963	-	973	lincRNA	-	-	21	37	0	0	0.635254	0.97871	0	0
ENSDARG00000041595	824.282	400.864	5.78017	2.03752	612.573	3.90885	7.28173	3.46926e-17	2.60135e-15	ces3	18	17418254	17426306	+	1748	protein_coding	carboxylesterase 3 [Source:ZFIN;Acc:ZDB-GENE-030131-9563]	COesterase	770	429	6	2	12.9655	6.31657	0.090882	0.0321342
ENSDARG00000103230	35.3264	20.5571	0	0	27.9417	0	7.25847	2.60971e-05	0.000326052	CABZ01079302.1	KN150335.1	34020	39346	-	558	protein_coding	-	I-set	33	22	0	0	1.74069	1.01474	0	0
ENSDARG00000042332	25.6919	28.9668	0	0	27.3294	0	7.22906	2.66916e-05	0.000332431	plin2	15	17030473	17048822	+	2060	protein_coding	perilipin 2 [Source:ZFIN;Acc:ZDB-GENE-050913-12]	Perilipin	24	31	0	0	0.342914	0.387311	0	0
ENSDARG00000092099	775.039	809.203	8.67025	2.03752	792.121	5.35389	7.18655	3.23733e-51	1.8653e-48	si:ch211-133n4.6	19	3186669	3193912	-	1233	protein_coding	si:ch211-133n4.6 [Source:ZFIN;Acc:ZDB-GENE-060503-571]	-	724	866	9	2	17.2829	18.0767	0.193262	0.045556
ENSDARG00000056628	95.2741	44.8519	0.963361	0	70.063	0.481681	7.14341	5.11064e-06	7.79774e-05	tmem170a	18	22405707	22414565	-	2235	protein_coding	transmembrane protein 170A [Source:ZFIN;Acc:ZDB-GENE-040426-1622]	-	89	48	1	0	1.17207	0.55275	0.0118465	0
ENSDARG00000074085	27.8329	23.3604	0	0	25.5966	0	7.13336	4.10382e-05	0.000486481	si:ch1073-188e1.1	22	6788761	6801876	-	432	protein_coding	si:ch1073-188e1.1 [Source:ZFIN;Acc:ZDB-GENE-070705-5]	-	26	25	0	0	1.77146	1.48943	0	0
ENSDARG00000100799	18.1984	29.9013	0	0	24.0498	0	7.04606	6.54275e-05	0.000730885	CR381540.1	14	11366695	11374026	-	1049	unprocessed_pseudogene	-	-	17	32	0	0	0.476995	0.785127	0	0
ENSDARG00000094374	29.9739	17.7539	0	0	23.8639	0	7.03093	6.98861e-05	0.000775941	BX000524.1	7	5629313	5640822	-	2355	protein_coding	-	-	28	19	0	0	0.349952	0.207648	0	0
ENSDARG00000102644	17.1279	27.098	0	0	22.113	0	6.92479	0.000108106	0.00112767	BX927193.1	4	46615995	46618012	-	642	processed_transcript	-	-	16	29	0	0	0.733543	1.16259	0	0
ENSDARG00000019096	115.614	4.67207	0	1.01876	60.1428	0.509381	6.90853	0.00787189	0.0408618	myl7	8	40457107	40464935	-	1337	protein_coding	myosin, light chain 7, regulatory [Source:ZFIN;Acc:ZDB-GENE-991019-3]	-	108	5	0	1	2.37757	0.0962507	0	0.0210062
ENSDARG00000086117	26.7624	16.8195	0	0	21.7909	0	6.90003	0.000119177	0.00122048	umod	1	55600504	55606573	+	1257	protein_coding	uromodulin [Source:ZFIN;Acc:ZDB-GENE-121214-192]	-	25	18	0	0	0.58539	0.368555	0	0
ENSDARG00000105273	190.548	230.8	3.85344	0	210.674	1.92672	6.73772	5.60579e-17	4.0777e-15	FP074902.2	19	18832318	18844395	-	1224	processed_transcript	-	-	178	247	4	0	4.28035	5.19375	0.086526	0
ENSDARG00000071029	168.068	144.834	0.963361	2.03752	156.451	1.50044	6.71667	3.07458e-13	1.46662e-11	si:dkey-147f3.4	23	16928506	16945441	+	1545	protein_coding	si:dkey-147f3.4 [Source:ZFIN;Acc:ZDB-GENE-061009-29]	F-box	157	155	1	2	2.99097	2.58207	0.0171372	0.0363563
ENSDARG00000035150	26.7624	11.213	0	0	18.9877	0	6.70007	0.000309257	0.00277167	si:dkey-261j4.4	5	61615663	61624693	-	1875	protein_coding	si:dkey-261j4.4 [Source:ZFIN;Acc:ZDB-GENE-060531-125]	-	25	12	0	0	0.392446	0.16472	0	0
ENSDARG00000095368	32.1149	5.60648	0	0	18.8607	0	6.68891	0.000502014	0.00419847	AL590146.1	9	34070996	34083167	-	453	processed_transcript	-	-	30	6	0	0	1.94923	0.340893	0	0
ENSDARG00000081799	16.0574	19.6227	0	0	17.8401	0	6.61404	0.000363071	0.00316963	RF00288	5	61580599	61580697	+	99	snoRNA	-	-	15	21	0	0	4.45961	5.45946	0	0
ENSDARG00000095200	49.2428	143.9	0.963361	1.01876	96.5713	0.991062	6.61023	2.28883e-08	5.59308e-07	si:ch211-197e7.1	4	49765093	49808690	-	4453	protein_coding	si:ch211-197e7.1 [Source:ZFIN;Acc:ZDB-GENE-081103-26]	NACHT	46	154	1	1	0.304051	0.890089	0.00594587	0.00630704
ENSDARG00000009311	44.9608	47.6551	0.963361	0	46.308	0.481681	6.54911	4.13849e-05	0.000489003	pvalb6	3	24297482	24434905	+	1590	protein_coding	parvalbumin 6 [Source:ZFIN;Acc:ZDB-GENE-040912-95]	-	42	51	1	0	0.777487	0.82554	0.0166522	0
ENSDARG00000112308	6.42298	437.306	2.89008	2.03752	221.864	2.4638	6.49165	0.00243058	0.0158338	BX537263.2	5	833599	833933	-	312	pseudogene	-	-	6	468	3	2	0.566027	38.6062	0.254586	0.180034
ENSDARG00000012535	186.266	253.226	1.92672	3.05629	219.746	2.4915	6.47183	1.10716e-18	9.6579e-17	epx	25	3119810	3139805	-	3261	protein_coding	eosinophil peroxidase [Source:ZFIN;Acc:ZDB-GENE-130425-2]	An_peroxidase	174	271	2	3	1.5705	2.13887	0.0162385	0.0258374
ENSDARG00000005128	150.94	112.13	1.92672	1.01876	131.535	1.47274	6.46868	6.0895e-12	2.48749e-10	rnaseh2b	9	29671553	29679172	+	1122	protein_coding	ribonuclease H2, subunit B [Source:ZFIN;Acc:ZDB-GENE-040426-1090]	-	141	120	2	1	3.69885	2.75267	0.047196	0.0250314
ENSDARG00000102409	23.5509	8.40973	0	0	15.9803	0	6.45086	0.000837649	0.00651059	CR381540.2	14	11378295	11385626	-	1048	unprocessed_pseudogene	-	-	22	9	0	0	0.617877	0.221028	0	0
ENSDARG00000093320	56.7363	29.9013	0.963361	0	43.3188	0.481681	6.45045	7.06818e-05	0.000782791	BX323028.1	23	10601324	10606546	+	393	unprocessed_pseudogene	-	-	53	32	1	0	3.96939	2.09567	0.0673714	0
ENSDARG00000079245	206.606	291.537	1.92672	4.07505	249.071	3.00089	6.38874	4.4674e-21	4.96517e-19	si:dkey-73p2.2	3	4294936	4303262	-	2901	protein_coding	si:dkey-73p2.2 [Source:ZFIN;Acc:ZDB-GENE-131119-50]	-	193	312	2	4	1.95817	2.76804	0.0182537	0.0387249
ENSDARG00000114964	11.7755	18.6883	0	0	15.2319	0	6.38701	0.000898842	0.00689322	pimr80	19	23468771	23470709	-	896	protein_coding	Pim proto-oncogene, serine/threonine kinase, related 80 [Source:ZFIN;Acc:ZDB-GENE-060503-402]	Pkinase	11	20	0	0	0.361348	0.574496	0	0
ENSDARG00000101048	19.2689	9.34414	0	0	14.3065	0	6.29208	0.00133247	0.00963173	FQ790208.1	11	2615070	2616023	+	575	lincRNA	-	-	18	10	0	0	0.921394	0.447608	0	0
ENSDARG00000102655	31.0444	42.0486	0.963361	0	36.5465	0.481681	6.20904	0.000153748	0.00152322	CABZ01050398.1	KN150193.1	4511	5548	-	1038	protein_coding	-	-	29	45	1	0	0.822321	1.11578	0.0255077	0
ENSDARG00000103806	140.235	149.506	0	4.07505	144.871	2.03752	6.18718	1.08683e-13	5.39596e-12	BX004785.3	3	6360774	6370802	+	1288	processed_transcript	-	zf-B_box	131	160	0	4	2.99362	3.1972	0	0.0872213
ENSDARG00000071103	18.1984	6.5409	0	0	12.3697	0	6.08134	0.00293508	0.0185411	si:dkey-222p3.1	22	28207968	28226948	-	925	protein_coding	si:dkey-222p3.1 [Source:ZFIN;Acc:ZDB-GENE-050208-374]	V-set	17	7	0	0	0.540939	0.19477	0	0
ENSDARG00000095086	17.1279	7.47531	0	0	12.3016	0	6.07392	0.00285631	0.0181325	cfdp1	18	22416051	22486767	+	1741	protein_coding	craniofacial development protein 1 [Source:ZFIN;Acc:ZDB-GENE-030131-5736]	-	16	8	0	0	0.270497	0.118265	0	0
ENSDARG00000058960	54.5953	69.1466	0.963361	1.01876	61.871	0.991062	5.96609	5.20361e-07	9.87287e-06	otol1b	15	1705167	1711472	+	2429	protein_coding	otolin 1b [Source:ZFIN;Acc:ZDB-GENE-080416-3]	Collagen	51	74	1	1	0.617993	0.784096	0.0109003	0.0115625
ENSDARG00000098958	3.21149	18.6883	0	0	10.9499	0	5.91392	0.00617125	0.0336789	znf1100	4	37577527	37587110	-	1078	protein_coding	zinc finger protein 1100 [Source:ZFIN;Acc:ZDB-GENE-120215-2]	zf-C2H2	3	20	0	0	0.0819112	0.477503	0	0
ENSDARG00000101364	9.63446	12.1474	0	0	10.8909	0	5.90216	0.0045241	0.026363	wfikkn1	1	59569516	59571785	-	2270	protein_coding	WAP, follistatin/kazal, immunoglobulin, kunitz and netrin domain containing 1 [Source:ZFIN;Acc:ZDB-GENE-040426-2465]	Kunitz_BPTI	9	13	0	0	0.116696	0.147395	0	0
ENSDARG00000005913	300.809	106.523	2.89008	4.07505	203.666	3.48257	5.87283	3.09011e-16	2.04404e-14	tgm1l3	23	40234602	40250886	-	2459	protein_coding	transglutaminase 1 like 3 [Source:ZFIN;Acc:ZDB-GENE-120718-1]	Transglut_core	281	114	3	4	3.36348	1.1932	0.0323021	0.0456857
ENSDARG00000094508	11.7755	8.40973	0	0	10.0926	0	5.79007	0.00639105	0.0345853	CR925709.2	23	24184719	24187176	-	839	processed_transcript	-	-	11	9	0	0	0.385897	0.276087	0	0
ENSDARG00000079773	9.63446	10.2786	0	0	9.95651	0	5.77208	0.00666734	0.0357447	nox5	25	7927349	7946732	-	2228	protein_coding	NADPH oxidase, EF-hand calcium binding domain 5 [Source:ZFIN;Acc:ZDB-GENE-091120-9]	FAD_binding_8	9	11	0	0	0.118896	0.12707	0	0
ENSDARG00000092717	8.56397	11.213	0	0	9.88847	0	5.763	0.00691891	0.0367159	BX569790.1	4	21653609	21696284	+	750	lincRNA	-	-	8	12	0	0	0.313957	0.411799	0	0
ENSDARG00000100748	18.1984	34.5733	0.963361	0	26.3859	0.481681	5.74109	0.000846966	0.00656204	RF00001	KN149753.1	24186	24308	+	123	rRNA	-	-	17	37	1	0	4.06803	7.74216	0.21526	0
ENSDARG00000097494	5.35248	14.0162	0	0	9.68435	0	5.73526	0.00830022	0.0426104	CR382327.2	15	2673935	2674590	+	656	unprocessed_pseudogene	-	-	5	15	0	0	0.22434	0.588508	0	0
ENSDARG00000102945	13.9164	4.67207	0	0	9.29426	0	5.66872	0.0101223	0.0496033	ccl39.2	25	13017489	13029702	-	1168	protein_coding	chemokine (C-C motif) ligand 39, duplicate 2 [Source:ZFIN;Acc:ZDB-GENE-131120-38]	-	13	5	0	0	0.327598	0.110177	0	0
ENSDARG00000101457	130.601	94.3758	0	5.09381	112.488	2.54691	5.4765	0.000416967	0.0035676	cdc42ep4a	3	50951203	50998577	-	2123	protein_coding	CDC42 effector protein (Rho GTPase binding) 4a [Source:ZFIN;Acc:ZDB-GENE-040704-22]	PBD	122	101	0	5	1.69142	1.22444	0	0.0661452
ENSDARG00000070964	37.4674	6.5409	0	1.01876	22.0041	0.509381	5.46322	0.00293343	0.0185411	si:rp71-15k1.1	19	9277327	9291727	+	2315	protein_coding	si:rp71-15k1.1 [Source:ZFIN;Acc:ZDB-GENE-030131-1113]	-	35	7	0	1	0.444998	0.0778238	0	0.0121319
ENSDARG00000040306	313.655	289.668	6.74353	7.13133	301.662	6.93743	5.44296	7.23111e-30	1.45252e-27	otomp	2	41504752	41518340	-	1149	protein_coding	otolith matrix protein [Source:ZFIN;Acc:ZDB-GENE-040709-1]	-	293	310	7	7	7.50565	6.94396	0.161304	0.171103
ENSDARG00000096644	49.2428	36.4422	1.92672	0	42.8425	0.963361	5.44175	1.6976e-05	0.000224993	adgre18	1	55608520	55617155	+	1948	protein_coding	adhesion G protein-coupled receptor E18 [Source:ZFIN;Acc:ZDB-GENE-121214-32]	7tm_2	46	39	2	0	0.69504	0.515277	0.0271837	0
ENSDARG00000058336	22.4804	19.6227	0	1.01876	21.0516	0.509381	5.40457	0.002186	0.0145258	slc25a22b	7	12976173	12999913	+	1700	protein_coding	solute carrier family 25 member 22b [Source:ZFIN;Acc:ZDB-GENE-110408-66]	Mito_carr	21	21	0	1	0.363589	0.317933	0	0.0165207
ENSDARG00000078522	680.835	526.075	18.3039	15.2814	603.455	16.7926	5.16396	3.1739e-53	1.9855e-50	si:ch211-80h18.1	19	3086851	3127290	-	3554	protein_coding	si:ch211-80h18.1 [Source:ZFIN;Acc:ZDB-GENE-070705-257]	-	636	563	19	15	5.26721	4.07715	0.141548	0.118537
ENSDARG00000026904	21.4099	14.0162	0	1.01876	17.7131	0.509381	5.15347	0.00467646	0.0270589	cbln13	2	37874771	37878304	+	1146	protein_coding	cerebellin 13 [Source:ZFIN;Acc:ZDB-GENE-070912-288]	-	20	15	0	1	0.513672	0.336877	0	0.0245072
ENSDARG00000099292	21.4099	13.0818	0.963361	0	17.2459	0.481681	5.12389	0.00521816	0.0294691	CR847534.1	3	49551580	49554912	-	1572	protein_coding	-	-	20	14	1	0	0.374471	0.229214	0.0168428	0
ENSDARG00000092077	245.144	301.816	7.70689	8.1501	273.48	7.92849	5.10989	2.33903e-27	4.06452e-25	si:dkey-147f3.4	23	16948049	16953236	+	725	protein_coding	si:dkey-147f3.4 [Source:ZFIN;Acc:ZDB-GENE-061009-29]	-	229	323	8	8	9.2969	11.4665	0.292159	0.309906
ENSDARG00000054658	14.9869	17.7539	0.963361	0	16.3704	0.481681	5.05165	0.00617125	0.0336789	slc34a1b	21	33006650	33032716	-	2054	protein_coding	solute carrier family 34 (type II sodium/phosphate cotransporter), member 1b [Source:ZFIN;Acc:ZDB-GENE-101006-4]	Na_Pi_cotrans	14	19	1	0	0.200617	0.238078	0.0128904	0
ENSDARG00000105212	16.0574	15.885	0	1.01876	15.9712	0.509381	5.00553	0.00683115	0.0363913	cfhl1	22	23693195	23706771	-	2682	protein_coding	complement factor H like 1 [Source:ZFIN;Acc:ZDB-GENE-050208-342]	Sushi	15	17	0	1	0.164616	0.163138	0	0.0104718
ENSDARG00000100332	12.846	18.6883	0	1.01876	15.7671	0.509381	4.98852	0.00731375	0.0383739	CABZ01084942.1	KN150630.1	17799	24120	+	3473	protein_coding	-	7tm_1	12	20	0	1	0.101699	0.148214	0	0.00808674
ENSDARG00000057661	5.35248	87.8349	0.963361	2.03752	46.5937	1.50044	4.96893	0.000132526	0.00134398	aldoca	15	16079586	16098531	-	2174	protein_coding	aldolase C, fructose-bisphosphate, a [Source:ZFIN;Acc:ZDB-GENE-050706-128]	-	5	94	1	2	0.0676942	1.11284	0.0121789	0.0258374
ENSDARG00000070142	8.56397	21.4915	0	1.01876	15.0277	0.509381	4.92065	0.00957545	0.0474654	cart4	19	42241530	42244358	-	727	protein_coding	cocaine- and amphetamine-regulated transcript 4 [Source:ZFIN;Acc:ZDB-GENE-060503-863]	-	8	23	0	1	0.323889	0.814252	0	0.0386317
ENSDARG00000045592	421.775	267.242	9.63361	13.2439	344.509	11.4388	4.9154	3.10938e-30	6.4838e-28	tnni2a.1	25	31222069	31236549	+	831	protein_coding	troponin I type 2a (skeletal, fast), tandem duplicate 1 [Source:ZFIN;Acc:ZDB-GENE-041114-60]	-	394	286	10	13	13.9552	8.85789	0.318616	0.43936
ENSDARG00000053450	46.0313	41.1142	0	3.05629	43.5728	1.52814	4.86253	1.28626e-05	0.000175468	ftr06	2	42294944	42308424	+	4413	protein_coding	finTRIM family, member 6 [Source:ZFIN;Acc:ZDB-GENE-070912-228]	zf-B_box	43	44	0	3	0.286797	0.256616	0	0.0190926
ENSDARG00000103814	36.3969	47.6551	1.92672	1.01876	42.026	1.47274	4.82677	1.27287e-05	0.000174076	CR450808.3	25	12967795	12969630	-	732	processed_transcript	-	-	34	51	2	1	1.36713	1.79318	0.0723414	0.0383678
ENSDARG00000103019	71.7232	39.2454	0	4.07505	55.4843	2.03752	4.79289	1.95552e-06	3.26591e-05	gstp2	14	3495542	3503708	+	873	protein_coding	glutathione S-transferase pi 2 [Source:ZFIN;Acc:ZDB-GENE-050601-1]	GST_N	67	42	0	4	2.25892	1.23823	0	0.128684
ENSDARG00000042698	79.2167	111.195	2.89008	4.07505	95.206	3.48257	4.77913	9.38812e-11	3.29412e-09	si:dkey-15j16.6	20	23847380	23852174	-	1884	protein_coding	si:dkey-15j16.6 [Source:ZFIN;Acc:ZDB-GENE-130531-45]	V-set	74	119	3	4	1.15609	1.62567	0.0421607	0.059629
ENSDARG00000077090	37.4674	69.1466	0.963361	3.05629	53.307	2.00982	4.74628	1.70331e-06	2.87763e-05	si:ch211-127b11.1	4	14636309	14642379	-	2274	protein_coding	si:ch211-127b11.1 [Source:ZFIN;Acc:ZDB-GENE-041210-159]	Sema	35	74	1	3	0.453021	0.837542	0.0116433	0.0370518
ENSDARG00000114577	232.298	714.827	14.4504	22.4128	473.562	18.4316	4.68486	4.23736e-08	9.88041e-07	si:dkey-159n16.2	4	49550966	49582758	-	8919	protein_coding	si:dkey-159n16.2 [Source:ZFIN;Acc:ZDB-GENE-131121-650]	SPRY	217	765	15	22	0.716118	2.20755	0.044529	0.0692763
ENSDARG00000087359	366.11	213.981	7.70689	15.2814	290.045	11.4942	4.6639	2.75341e-24	3.88942e-22	c3a.2	1	56229674	56266731	+	5167	protein_coding	complement component c3a, duplicate 2 [Source:ZFIN;Acc:ZDB-GENE-990415-36]	A2M_comp	342	229	8	15	1.94818	1.14068	0.0409939	0.0815326
ENSDARG00000100547	32.1149	17.7539	0.963361	1.01876	24.9344	0.991062	4.65126	0.00081042	0.0063259	CR383680.1	14	11338375	11363493	-	1357	unprocessed_pseudogene	-	-	30	19	1	1	0.650702	0.360362	0.0195114	0.0206966
ENSDARG00000102856	92.0627	52.3272	3.85344	2.03752	72.1949	2.94548	4.60472	3.09165e-08	7.40609e-07	si:ch73-59f11.3	3	6600294	6608342	-	916	protein_coding	si:ch73-59f11.3 [Source:ZFIN;Acc:ZDB-GENE-131121-446]	-	86	56	4	2	2.7634	1.57347	0.11562	0.0613215
ENSDARG00000100690	203.394	298.078	13.4871	7.13133	250.736	10.3092	4.5975	3.56034e-23	4.78243e-21	si:ch211-256e16.11	3	58188903	58189429	-	527	protein_coding	si:ch211-256e16.11 [Source:ZFIN;Acc:ZDB-GENE-131127-41]	SPRY	190	319	14	7	10.6117	15.5792	0.703372	0.373049
ENSDARG00000115716	1405.56	76.622	33.7176	29.5441	741.092	31.6309	4.55006	0.00435916	0.0255744	CT583728.22	4	55793431	55795305	-	1875	rRNA	-	-	1313	82	35	29	20.6112	1.12558	0.494236	0.434385
ENSDARG00000070239	360.757	465.338	13.4871	22.4128	413.048	17.9499	4.53141	1.44664e-36	4.65796e-34	knl1	1	11086957	11104805	-	5496	protein_coding	kinetochore scaffold 1 [Source:ZFIN;Acc:ZDB-GENE-030131-5437]	-	337	498	14	22	1.80478	2.3321	0.0674449	0.112423
ENSDARG00000079703	378.956	566.255	3.85344	37.6942	472.605	20.7738	4.50964	0.000670688	0.00536918	si:dkey-18p12.4	9	30387916	30392745	+	1738	protein_coding	si:dkey-18p12.4 [Source:ZFIN;Acc:ZDB-GENE-070912-408]	-	354	606	4	37	5.99507	8.97404	0.0609366	0.597902
ENSDARG00000078832	346.841	360.684	12.5237	19.3565	353.762	15.9401	4.47789	4.97059e-34	1.39527e-31	CR774195.1	3	4403980	4426242	+	6363	protein_coding	-	-	324	386	13	19	1.49873	1.56132	0.054094	0.0838629
ENSDARG00000062178	259.06	156.047	13.4871	5.09381	207.554	9.29043	4.46924	3.58719e-18	3.04424e-16	ripor1	18	22138924	22283398	+	5115	protein_coding	RHO family interacting cell polarization regulator 1 [Source:ZFIN;Acc:ZDB-GENE-050420-32]	-	242	167	14	5	1.39255	0.840303	0.0724687	0.0274538
ENSDARG00000097158	13.9164	29.9013	0	2.03752	21.9089	1.01876	4.4564	0.0023243	0.0152367	BX294100.1	12	39444747	39447630	-	924	lincRNA	-	-	13	32	0	2	0.414107	0.89134	0	0.0607906
ENSDARG00000062045	70.6527	56.9993	0.963361	5.09381	63.826	3.02859	4.41472	2.03973e-07	4.18947e-06	il1rapl1a	9	29716380	29985390	-	4080	protein_coding	interleukin 1 receptor accessory protein-like 1a [Source:ZFIN;Acc:ZDB-GENE-061013-249]	TIR	66	61	1	5	0.476129	0.3848	0.00648945	0.0344182
ENSDARG00000103093	6.42298	35.5077	0	2.03752	20.9654	1.01876	4.39247	0.00469918	0.0271474	alg14	24	31201195	31223232	-	965	protein_coding	ALG14, UDP-N-acetylglucosaminyltransferase subunit [Source:ZFIN;Acc:ZDB-GENE-041010-195]	-	6	38	0	2	0.183006	1.01349	0	0.0582078
ENSDARG00000101088	158.433	130.818	7.70689	6.11257	144.626	6.90973	4.38365	2.61597e-15	1.5397e-13	si:ch73-359m17.5	19	48339349	48340774	-	592	protein_coding	si:ch73-359m17.5 [Source:ZFIN;Acc:ZDB-GENE-141212-366]	-	148	140	8	6	7.35836	6.08656	0.357797	0.284648
ENSDARG00000105244	42.8198	38.311	3.85344	0	40.5654	1.92672	4.36985	4.03641e-05	0.000479789	BX649431.3	4	52148759	52154668	-	814	lincRNA	-	-	40	41	4	0	1.44636	1.29636	0.130108	0
ENSDARG00000101924	33.1854	47.6551	1.92672	2.03752	40.4202	1.98212	4.35231	2.33326e-05	0.000297016	si:dkey-65b13.13	20	33513664	33515890	-	2227	protein_coding	si:dkey-65b13.13 [Source:ZFIN;Acc:ZDB-GENE-141216-308]	-	31	51	2	2	0.409715	0.589407	0.0237781	0.0252225
ENSDARG00000024032	6521.46	4994.44	273.595	293.403	5757.95	283.499	4.34429	7.92038e-186	8.67083e-182	coch	17	28743661	28749640	-	2303	protein_coding	coagulation factor C homolog, cochlin (Limulus polyphemus) [Source:ZFIN;Acc:ZDB-GENE-030616-403]	VWA	6092	5345	284	288	77.8586	59.7336	3.26507	3.51218
ENSDARG00000103973	32.1149	65.409	1.92672	3.05629	48.7619	2.4915	4.29926	6.63005e-06	9.81544e-05	CABZ01051602.1	KN150654.1	8142	14617	-	2723	protein_coding	-	-	30	70	2	3	0.324276	0.661631	0.0194469	0.0309423
ENSDARG00000043482	16.0574	22.4259	1.92672	0	19.2417	0.963361	4.2954	0.00402771	0.0239573	zgc:86586	8	13534385	13541514	-	1454	protein_coding	zgc:86586 [Source:ZFIN;Acc:ZDB-GENE-040625-129]	Galactosyl_T	15	24	2	0	0.303646	0.424827	0.0364195	0
ENSDARG00000101014	24.6214	31.7701	2.89008	0	28.1957	1.44504	4.26193	0.000598747	0.0048818	slco1f4	4	72134837	72179937	-	2709	protein_coding	solute carrier organic anion transporter family, member 1F4 [Source:ZFIN;Acc:ZDB-GENE-070112-2172]	-	23	34	3	0	0.249896	0.323024	0.0293211	0
ENSDARG00000078841	52.4543	59.8025	4.81681	1.01876	56.1284	2.91778	4.24968	1.16789e-06	2.06718e-05	si:ch211-195b13.6	19	24938136	24958393	-	1553	protein_coding	si:ch211-195b13.6 [Source:ZFIN;Acc:ZDB-GENE-120215-27]	-	49	64	5	1	0.928679	1.06065	0.0852445	0.0180845
ENSDARG00000092436	21.4099	15.885	1.92672	0	18.6475	0.963361	4.24767	0.00474208	0.0273016	BX537137.1	4	36906436	36912936	+	966	protein_coding	-	zf-C2H2	20	17	2	0	0.609388	0.452936	0.0548177	0
ENSDARG00000041340	405.718	391.52	34.681	8.1501	398.619	21.4155	4.21539	2.09896e-06	3.4895e-05	mrpl51	16	4540981	4547193	-	2374	protein_coding	mitochondrial ribosomal protein L51 [Source:ZFIN;Acc:ZDB-GENE-050320-40]	-	379	419	36	8	4.69893	4.54254	0.401504	0.0946428
ENSDARG00000088000	16.0574	20.5571	0	2.03752	18.3073	1.01876	4.19445	0.00533576	0.0300402	znf1057	4	49656481	49720964	-	2646	protein_coding	zinc finger protein 1057 [Source:ZFIN;Acc:ZDB-GENE-131120-158]	-	15	22	0	2	0.166856	0.213992	0	0.0212285
ENSDARG00000068303	42.8198	47.6551	1.92672	3.05629	45.2375	2.4915	4.18887	8.508e-06	0.000121931	zgc:171509	18	39060687	39065115	+	1241	protein_coding	zgc:171509 [Source:ZFIN;Acc:ZDB-GENE-080219-48]	Trypsin	40	51	2	3	0.9487	1.0577	0.0426703	0.0678934
ENSDARG00000001993	287.963	144.834	11.5603	12.2251	216.399	11.8927	4.18417	1.30053e-17	1.04688e-15	myhb	6	40745437	40756138	-	6228	protein_coding	myosin, heavy chain b [Source:ZFIN;Acc:ZDB-GENE-081124-1]	Myosin_head	269	155	12	12	1.27129	0.640543	0.0510153	0.0541142
ENSDARG00000105473	111.332	167.26	5.78017	10.1876	139.296	7.98389	4.13312	1.41269e-13	6.88884e-12	si:cabz01036006.1	7	6066772	6100716	-	4220	protein_coding	si:cabz01036006.1 [Source:ZFIN;Acc:ZDB-GENE-160113-146]	-	104	179	6	10	0.725374	1.09171	0.037645	0.0665527
ENSDARG00000102650	141.305	180.342	8.67025	10.1876	160.824	9.42894	4.09526	4.18413e-16	2.71844e-14	BX248331.2	11	4187022	4194697	-	3811	lincRNA	-	-	132	193	9	10	1.01947	1.30342	0.0625276	0.0736952
ENSDARG00000111588	43.8903	41.1142	0.963361	4.07505	42.5023	2.5192	4.09178	2.48006e-05	0.000312433	zgc:162898	18	19883325	19886744	+	3334	protein_coding	zgc:162898 [Source:ZFIN;Acc:ZDB-GENE-070410-107]	-	41	44	1	4	0.361959	0.339666	0.0079415	0.0336956
ENSDARG00000052626	135.953	123.343	8.67025	7.13133	129.648	7.90079	4.03359	1.62049e-13	7.88458e-12	AL954655.1	12	46188692	46204837	-	5064	unprocessed_pseudogene	-	-	127	132	9	7	0.738161	0.670881	0.0470562	0.0388224
ENSDARG00000110781	33.1854	29.9013	3.85344	0	31.5433	1.92672	4.00919	0.000436253	0.00370798	prf1.7	19	24196088	24198184	-	2018	protein_coding	perforin 1.7 [Source:ZFIN;Acc:ZDB-GENE-111212-11]	C2	31	32	4	0	0.452149	0.408126	0.0524816	0
ENSDARG00000045268	108.12	66.3434	5.78017	5.09381	87.2318	5.43699	4.00048	3.752e-09	1.03334e-07	tectb	12	31476169	31484677	-	1663	protein_coding	tectorin beta [Source:ZFIN;Acc:ZDB-GENE-041212-16]	Zona_pellucida	101	71	6	5	1.7876	1.09883	0.0955272	0.0844415
ENSDARG00000076126	1187.18	1091.4	69.362	82.5197	1139.29	75.9409	3.90862	1.0462e-83	1.76203e-80	actc1a	19	47549568	47555956	-	1425	protein_coding	actin, alpha, cardiac muscle 1a [Source:ZFIN;Acc:ZDB-GENE-040520-4]	Actin	1109	1168	72	81	22.9064	21.0957	1.33778	1.59642
ENSDARG00000042186	57.8068	46.7207	1.92672	5.09381	52.2637	3.51027	3.90607	4.14556e-06	6.48216e-05	paplnb	20	33499378	33512443	-	1975	protein_coding	papilin b, proteoglycan-like sulfated glycoprotein [Source:ZFIN;Acc:ZDB-GENE-030131-6023]	Kunitz_BPTI	54	50	2	5	0.804762	0.651581	0.0268121	0.0711019
ENSDARG00000097513	529.896	566.255	39.4978	33.6191	548.075	36.5585	3.90454	1.20224e-46	6.12162e-44	CT573383.1	25	34035541	34050402	+	1097	transcribed_unprocessed_pseudogene	-	-	495	606	41	33	13.2813	14.2178	0.989567	0.844862
ENSDARG00000056621	717.232	371.897	47.2047	26.4878	544.565	36.8463	3.88015	6.61851e-28	1.18781e-25	ctcf	18	22285992	22295064	+	6551	protein_coding	CCCTC-binding factor (zinc finger protein) [Source:ZFIN;Acc:ZDB-GENE-040624-5]	-	670	398	49	26	3.01029	1.56365	0.198042	0.111466
ENSDARG00000075626	148.799	210.243	22.1573	4.07505	179.521	13.1162	3.7636	1.98832e-12	8.53611e-11	zgc:172090	3	3016408	3019979	-	3071	protein_coding	zgc:172090 [Source:ZFIN;Acc:ZDB-GENE-080204-40]	-	139	225	23	4	1.33222	1.88568	0.198297	0.0365812
ENSDARG00000061899	23.5509	15.885	2.89008	0	19.718	1.44504	3.74652	0.00638336	0.0345607	iqub	25	27873671	27912373	+	2627	protein_coding	IQ motif and ubiquitin domain containing [Source:ZFIN;Acc:ZDB-GENE-110421-1]	-	22	17	3	0	0.246492	0.166554	0.0302363	0
ENSDARG00000070770	44.9608	73.8187	3.85344	5.09381	59.3898	4.47363	3.73595	1.67183e-06	2.83136e-05	her4.3	23	21459263	21461140	+	1783	protein_coding	hairy-related 4, tandem duplicate 3 [Source:ZFIN;Acc:ZDB-GENE-081030-7]	HLH	42	79	4	5	0.693328	1.14036	0.0593987	0.0787584
ENSDARG00000099444	32.1149	20.5571	0.963361	3.05629	26.336	2.00982	3.72192	0.00129353	0.00939051	znf1122	4	47385355	47392824	+	1579	protein_coding	zinc finger protein 1122 [Source:ZFIN;Acc:ZDB-GENE-141211-60]	zf-C2H2	30	22	1	3	0.559216	0.358596	0.0167682	0.0533602
ENSDARG00000061006	44.9608	7.47531	1.92672	2.03752	26.2181	1.98212	3.72091	0.00308209	0.0192807	cyb5d2	5	31032149	31035198	-	965	protein_coding	cytochrome b5 domain containing 2 [Source:ZFIN;Acc:ZDB-GENE-050506-83]	-	42	8	2	2	1.28104	0.213367	0.0548745	0.0582078
ENSDARG00000100234	37.4674	27.098	3.85344	1.01876	32.2827	2.4361	3.71351	0.000400858	0.00344864	BX511246.1	23	9353552	9357627	+	4076	protein_coding	-	RVT_1	35	29	4	1	0.25274	0.183117	0.0259833	0.0068904
ENSDARG00000094518	56.7363	32.7045	6.74353	0	44.7204	3.37176	3.70799	0.000151344	0.00150484	zgc:172014	9	33115926	33121587	-	1668	protein_coding	zgc:172014 [Source:ZFIN;Acc:ZDB-GENE-080215-22]	-	53	35	7	0	0.935235	0.540054	0.111114	0
ENSDARG00000099600	98.4856	106.523	7.70689	8.1501	102.504	7.92849	3.6935	1.78621e-10	6.0823e-09	si:dkey-93h22.7	11	45174520	45185792	-	2085	protein_coding	si:dkey-93h22.7 [Source:ZFIN;Acc:ZDB-GENE-141216-252]	-	92	114	8	8	1.29874	1.40723	0.10159	0.107761
ENSDARG00000068865	28.9034	33.6389	3.85344	1.01876	31.2712	2.4361	3.66977	0.000495609	0.00415284	si:dkey-61p9.7	4	77657660	77669219	+	2244	protein_coding	si:dkey-61p9.7 [Source:ZFIN;Acc:ZDB-GENE-041210-241]	-	27	36	4	1	0.354145	0.4129	0.047196	0.0125157
ENSDARG00000083310	20.3394	16.8195	2.89008	0	18.5794	1.44504	3.66193	0.00851459	0.0435373	dre-mir-146a	13	11822170	11822283	+	114	miRNA	dre-mir-146a [Source:miRBase;Acc:MI0002012]	-	19	18	3	0	4.90557	4.06381	0.696762	0
ENSDARG00000074136	38.5379	22.4259	1.92672	3.05629	30.4819	2.4915	3.61552	0.00060972	0.00495907	slc47a2.2	1	49532662	49544601	-	3186	protein_coding	solute carrier family 47 (multidrug and toxin extrusion), member 2.2 [Source:ZFIN;Acc:ZDB-GENE-070615-14]	HECT	36	24	2	3	0.332581	0.193879	0.0166208	0.0264456
ENSDARG00000096772	13.9164	22.4259	0.963361	2.03752	18.1712	1.50044	3.60856	0.00744653	0.0389679	BX510319.1	8	15476625	15479807	+	1587	lincRNA	-	-	13	24	1	2	0.241106	0.389224	0.0166836	0.0353941
ENSDARG00000097637	82.4282	74.7531	4.81681	8.1501	78.5907	6.48345	3.60482	4.02914e-08	9.4553e-07	si:ch211-246i5.5	3	24134418	24145250	+	3292	protein_coding	si:ch211-246i5.5 [Source:ZFIN;Acc:ZDB-GENE-131121-529]	-	77	80	5	8	0.688449	0.625454	0.0402141	0.0682509
ENSDARG00000070657	2671.96	3346.14	262.034	238.39	3009.05	250.212	3.58789	3.50275e-118	9.58659e-115	pa2g4b	23	25291891	25301475	+	2261	protein_coding	proliferation-associated 2G4, b [Source:ZFIN;Acc:ZDB-GENE-030131-2182]	Peptidase_M24	2496	3581	272	234	32.4926	40.7633	3.1852	2.90666
ENSDARG00000069966	104.909	46.7207	11.5603	1.01876	75.8147	6.28955	3.57521	6.40653e-06	9.51635e-05	alox5b.3	15	590670	604353	-	4387	protein_coding	arachidonate 5-lipoxygenase b, tandem duplicate 3 [Source:ZFIN;Acc:ZDB-GENE-050522-330]	Lipoxygenase	98	50	12	1	0.657505	0.293338	0.0724238	0.00640193
ENSDARG00000097728	132.742	144.834	6.74353	17.319	138.788	12.0312	3.53725	7.20186e-12	2.92551e-10	CR388132.1	4	29139757	29142639	-	1093	lincRNA	-	-	124	155	7	17	3.3392	3.64987	0.169569	0.436825
ENSDARG00000109267	478.512	500.846	60.6918	26.4878	489.679	43.5898	3.48374	2.33025e-28	4.3238e-26	bcam	KN150244.1	18842	39461	-	1312	protein_coding	basal cell adhesion molecule (Lutheran blood group) [Source:ZFIN;Acc:ZDB-GENE-060929-620]	-	447	536	63	26	10.028	10.5147	1.27138	0.556568
ENSDARG00000075048	733.29	755.007	52.0215	81.501	744.148	66.7612	3.48243	2.13363e-47	1.13941e-44	lonrf1	14	34068075	34092744	+	5581	protein_coding	LON peptidase N-terminal domain and ring finger 1 [Source:ZFIN;Acc:ZDB-GENE-101021-4]	-	685	808	54	80	3.6126	3.72619	0.256183	0.402584
ENSDARG00000041117	36.3969	41.1142	0.963361	6.11257	38.7555	3.53797	3.46882	0.000251483	0.00233413	wnt2	18	20613241	20636549	-	1509	protein_coding	wingless-type MMTV integration site family member 2 [Source:ZFIN;Acc:ZDB-GENE-980526-416]	wnt	34	44	1	6	0.663179	0.750462	0.017546	0.111671
ENSDARG00000108475	372.533	360.684	29.8642	36.6754	366.608	33.2698	3.46391	1.52756e-29	2.98624e-27	otos	24	26302781	26304386	-	760	protein_coding	otospiralin [Source:ZFIN;Acc:ZDB-GENE-120601-1]	-	348	386	31	36	13.4774	13.0719	1.07998	1.33035
ENSDARG00000097001	57.8068	60.7369	5.78017	5.09381	59.2719	5.43699	3.44533	2.26657e-06	3.73413e-05	FP245462.1	16	23017031	23019562	-	873	processed_transcript	-	-	54	65	6	5	1.82062	1.9163	0.181972	0.160855
ENSDARG00000075513	26.7624	27.098	1.92672	3.05629	26.9302	2.4915	3.43916	0.00136715	0.00983372	ccdc136b	25	34984333	35012981	+	3292	protein_coding	coiled-coil domain containing 136b [Source:ZFIN;Acc:ZDB-GENE-081104-244]	-	25	29	2	3	0.223522	0.226727	0.0160856	0.0255941
ENSDARG00000062350	42.8198	31.7701	1.92672	5.09381	37.295	3.51027	3.41747	0.000246797	0.00229648	synm	18	20859661	20869175	-	3222	protein_coding	synemin, intermediate filament protein [Source:ZFIN;Acc:ZDB-GENE-050419-81]	Filament	40	34	2	5	0.365406	0.271593	0.0164351	0.0435836
ENSDARG00000079997	77.0757	120.539	9.63361	9.16886	98.8076	9.40123	3.39508	5.74879e-09	1.53875e-07	si:zfos-223e1.2	20	48488954	48516765	-	1775	protein_coding	si:zfos-223e1.2 [Source:ZFIN;Acc:ZDB-GENE-110411-269]	Pyr_redox_2	72	129	10	9	1.19392	1.8705	0.149166	0.142404
ENSDARG00000097085	25.6919	15.885	1.92672	2.03752	20.7885	1.98212	3.38896	0.00538828	0.0302664	si:ch211-261a10.5	15	9278992	9294929	-	1693	protein_coding	si:ch211-261a10.5 [Source:ZFIN;Acc:ZDB-GENE-131127-398]	Ion_trans_2	24	17	2	2	0.417249	0.258439	0.0312781	0.0331781
ENSDARG00000068992	16871	16755	1416.14	1825.62	16813	1620.88	3.37514	4.41062e-169	3.21902e-165	hspa8	10	29849497	29858018	+	6877	protein_coding	heat shock protein 8 [Source:ZFIN;Acc:ZDB-GENE-990415-92]	HSP70	15760	17931	1470	1792	67.4525	67.1075	5.65961	7.31842
ENSDARG00000070543	41.7493	28.9668	5.78017	1.01876	35.3581	3.39946	3.36339	0.000588656	0.00480768	grin2ab	1	8763429	8928841	-	7880	protein_coding	glutamate receptor, ionotropic, N-methyl D-aspartate 2A, b [Source:ZFIN;Acc:ZDB-GENE-070424-223]	Lig_chan	39	31	6	1	0.145673	0.101251	0.0201601	0.00356412
ENSDARG00000042683	55.6658	63.5402	8.67025	3.05629	59.603	5.86327	3.33666	6.6303e-06	9.81544e-05	si:dkey-15j16.3	20	23838814	23842631	-	2723	protein_coding	si:dkey-15j16.3 [Source:ZFIN;Acc:ZDB-GENE-030131-4680]	V-set	52	68	9	3	0.562078	0.642727	0.087511	0.0309423
ENSDARG00000103947	52.4543	56.9993	4.81681	6.11257	54.7268	5.46469	3.32692	8.21049e-06	0.000118425	znf1028	3	61531215	61533846	+	2442	protein_coding	zinc finger protein 1028 [Source:ZFIN;Acc:ZDB-GENE-131125-19]	zf-C2H2	49	61	5	6	0.590597	0.642909	0.0542116	0.0690055
ENSDARG00000112301	36.3969	33.6389	0.963361	6.11257	35.0179	3.53797	3.32103	0.000665865	0.00534033	CU570881.2	22	4782287	4813345	-	2683	protein_coding	-	-	34	36	1	6	0.372992	0.34534	0.00986841	0.0628071
ENSDARG00000100366	528.825	439.175	43.3513	53.9944	484	48.6728	3.31511	1.1264e-33	2.90148e-31	si:dkey-102m7.3	14	14836468	14838541	+	1738	protein_coding	si:dkey-102m7.3 [Source:ZFIN;Acc:ZDB-GENE-091204-389]	-	494	470	45	53	8.366	6.96007	0.685537	0.856455
ENSDARG00000099265	114.543	82.2284	9.63361	10.1876	98.3858	9.91062	3.31048	5.98012e-09	1.59871e-07	slc7a5	25	12750340	12788370	-	1708	protein_coding	solute carrier family 7 (amino acid transporter light chain, L system), member 5 [Source:ZFIN;Acc:ZDB-GENE-080818-4]	-	107	88	10	10	1.8439	1.32605	0.155017	0.164434
ENSDARG00000096622	24.6214	43.9175	1.92672	5.09381	34.2694	3.51027	3.2987	0.000668273	0.00535532	adgre16	1	55535827	55540577	+	1483	protein_coding	adhesion G protein-coupled receptor E16 [Source:ZFIN;Acc:ZDB-GENE-121214-46]	7tm_2	23	47	2	5	0.456486	0.815684	0.0357073	0.0946907
ENSDARG00000008182	10.705	38.311	0.963361	4.07505	24.508	2.5192	3.29795	0.00601956	0.0330156	si:ch73-111e15.1	10	22110842	22117121	-	1674	protein_coding	si:ch73-111e15.1 [Source:ZFIN;Acc:ZDB-GENE-110411-28]	Lectin_C	10	41	1	4	0.175827	0.630367	0.0158166	0.0671093
ENSDARG00000103237	48.1723	28.9668	4.81681	3.05629	38.5696	3.93655	3.28565	0.000259557	0.00239333	si:ch73-299h12.8	21	2342856	2348838	-	750	protein_coding	si:ch73-299h12.8 [Source:ZFIN;Acc:ZDB-GENE-081031-66]	-	45	31	5	3	1.76601	1.06381	0.176513	0.112341
ENSDARG00000070724	23.5509	24.2948	0.963361	4.07505	23.9228	2.5192	3.25993	0.00409944	0.0242951	chrna4b	11	12982260	12998400	-	2265	protein_coding	cholinergic receptor, nicotinic, alpha 4b [Source:ZFIN;Acc:ZDB-GENE-090505-3]	Neur_chan_memb	22	26	1	4	0.285888	0.295441	0.0116896	0.0495987
ENSDARG00000035221	115.614	99.0479	16.3771	6.11257	107.331	11.2449	3.24573	8.77134e-09	2.29449e-07	zgc:110249	3	12977	46058	-	1626	protein_coding	zgc:110249 [Source:ZFIN;Acc:ZDB-GENE-050522-331]	zf-C2H2	108	106	17	6	1.95499	1.67784	0.276819	0.103636
ENSDARG00000006137	76.0052	64.4746	3.85344	11.2064	70.2399	7.52991	3.23013	2.21759e-06	3.66447e-05	star	8	44703854	44707937	+	1378	protein_coding	steroidogenic acute regulatory protein [Source:ZFIN;Acc:ZDB-GENE-001120-3]	START	71	69	4	11	1.51653	1.28874	0.0768562	0.224193
ENSDARG00000078004	29.9739	15.885	3.85344	1.01876	22.9295	2.4361	3.22052	0.00589498	0.0324542	drl	5	61645156	61652254	-	1862	protein_coding	draculin [Source:ZFIN;Acc:ZDB-GENE-991213-3]	-	28	17	4	1	0.442608	0.234982	0.0568785	0.0150834
ENSDARG00000090015	248.355	281.259	50.0948	7.13133	264.807	28.6131	3.20865	0.00590877	0.0325138	CR388047.1	3	2669813	2673643	+	1642	protein_coding	-	-	232	301	52	7	4.15868	4.71801	0.83849	0.11973
ENSDARG00000104721	254.778	341.996	26.9741	38.713	298.387	32.8435	3.18767	2.87485e-20	2.99737e-18	si:dkey-203a12.9	14	15620640	15625472	+	430	protein_coding	si:dkey-203a12.9 [Source:ZFIN;Acc:ZDB-GENE-141216-334]	-	238	366	28	38	16.2911	21.9067	1.72408	2.48195
ENSDARG00000069301	313.655	381.241	25.0474	51.9569	347.448	38.5021	3.17973	2.34175e-20	2.47694e-18	tmem177	9	29034221	29039506	-	2103	protein_coding	transmembrane protein 177 [Source:ZFIN;Acc:ZDB-GENE-030131-993]	-	293	408	26	51	4.10081	4.99328	0.327342	0.681097
ENSDARG00000033020	146.658	123.343	23.1207	7.13133	135	15.126	3.14867	1.98478e-09	5.68062e-08	ppcdc	18	18975539	18979520	-	1886	protein_coding	phosphopantothenoylcysteine decarboxylase [Source:ZFIN;Acc:ZDB-GENE-040426-1749]	Flavoprotein	137	132	24	7	2.13806	1.80135	0.336928	0.10424
ENSDARG00000075855	87.7807	106.523	4.81681	17.319	97.1519	11.0679	3.14412	2.03786e-07	4.18947e-06	adgre10	1	55730205	55747003	+	3625	protein_coding	adhesion G protein-coupled receptor E10 [Source:ZFIN;Acc:ZDB-GENE-090313-152]	7tm_2	82	114	5	17	0.665804	0.809398	0.0365199	0.13171
ENSDARG00000076043	95.2741	46.7207	0.963361	15.2814	70.9974	8.1224	3.13783	0.000109211	0.00113703	si:dkeyp-73d8.9	2	32642338	32643738	-	1084	protein_coding	si:dkeyp-73d8.9 [Source:ZFIN;Acc:ZDB-GENE-070912-685]	-	89	50	1	15	2.41658	1.18715	0.0244252	0.388634
ENSDARG00000038587	275.117	258.833	18.3039	42.788	266.975	30.5459	3.13369	2.34721e-16	1.57645e-14	CU929150.1	2	45159855	45162467	+	2613	protein_coding	-	-	257	277	19	42	2.89491	2.72838	0.192523	0.451428
ENSDARG00000101551	163.786	99.9823	20.2306	10.1876	131.884	15.2091	3.10898	1.90041e-09	5.4534e-08	si:dkey-261j11.2	4	75840584	75930041	-	5437	protein_coding	si:dkey-261j11.2 [Source:ZFIN;Acc:ZDB-GENE-131121-647]	NACHT	153	107	21	10	0.828272	0.506512	0.102265	0.0516558
ENSDARG00000099470	357.546	217.718	38.5344	28.5253	287.632	33.5299	3.09684	4.1438e-17	3.07554e-15	muc5.3	7	72291181	72337942	-	17245	protein_coding	mucin 5.3 [Source:ZFIN;Acc:ZDB-GENE-040426-1562]	VWD	334	233	40	28	0.570065	0.347743	0.0614136	0.0456009
ENSDARG00000009881	362.898	281.259	34.681	41.7692	322.078	38.2251	3.0754	1.01685e-21	1.20346e-19	ier5	22	16497670	16499153	+	1484	protein_coding	immediate early response 5 [Source:ZFIN;Acc:ZDB-GENE-030616-127]	-	339	301	36	41	6.72367	5.22033	0.642298	0.77594
ENSDARG00000088274	112.402	116.802	13.4871	14.2627	114.602	13.8749	3.0468	1.05842e-09	3.19201e-08	si:ch211-181d7.1	15	42693455	42720384	-	3503	protein_coding	si:ch211-181d7.1 [Source:ZFIN;Acc:ZDB-GENE-121214-14]	NACHT	105	125	14	14	0.882247	0.918407	0.105817	0.112245
ENSDARG00000091280	406.788	556.911	66.4719	51.9569	481.85	59.2144	3.02377	3.52771e-27	6.03431e-25	si:ch211-66k16.27	2	45441007	45448291	+	1149	protein_coding	si:ch211-66k16.27 [Source:ZFIN;Acc:ZDB-GENE-120709-9]	CARD	380	596	69	51	9.73429	13.3503	1.59	1.2466
ENSDARG00000045273	282.611	227.997	33.7176	29.5441	255.304	31.6309	3.01073	5.08221e-18	4.26341e-16	tmem204	24	37854002	37877978	-	2078	protein_coding	transmembrane protein 204 [Source:ZFIN;Acc:ZDB-GENE-040724-12]	-	264	244	35	29	3.73938	3.02211	0.445954	0.39195
ENSDARG00000093381	396.084	530.747	38.5344	80.4822	463.415	59.5083	2.96605	2.55002e-20	2.68426e-18	tgm2l	18	18803539	18850302	-	4038	protein_coding	transglutaminase 2, like [Source:ZFIN;Acc:ZDB-GENE-050420-97]	Transglut_core	370	568	40	79	2.69697	3.62032	0.262278	0.549464
ENSDARG00000007195	25.6919	28.0324	4.81681	2.03752	26.8622	3.42716	2.96338	0.00361278	0.0218937	grm2b	11	36158134	36216651	+	5545	protein_coding	glutamate receptor, metabotropic 2b [Source:ZFIN;Acc:ZDB-GENE-060201-5]	ANF_receptor	24	30	5	2	0.127394	0.139247	0.0238746	0.0101299
ENSDARG00000085425	24.6214	19.6227	3.85344	2.03752	22.1221	2.94548	2.90208	0.00858177	0.0437618	RF00001	2	42998802	42998919	+	118	rRNA	-	-	23	21	4	2	5.73702	4.58039	0.897524	0.476021
ENSDARG00000099811	66.3708	80.3596	14.4504	5.09381	73.3652	9.77211	2.90125	7.66244e-06	0.000111623	si:dkey-203a12.7	14	15543331	15544198	+	521	protein_coding	si:dkey-203a12.7 [Source:ZFIN;Acc:ZDB-GENE-141216-159]	-	62	86	15	5	3.50263	4.24841	0.762292	0.269532
ENSDARG00000079783	706.527	585.878	59.7284	114.101	646.203	86.9149	2.89735	6.18954e-26	9.82029e-24	isg20	25	19095231	19100469	+	1514	protein_coding	interferon stimulated exonuclease gene [Source:ZFIN;Acc:ZDB-GENE-100422-17]	Exonuc_X-T	660	627	62	112	12.831	10.6588	1.08426	2.07764
ENSDARG00000062873	156.292	137.359	23.1207	16.3002	146.826	19.7104	2.89346	6.4044e-11	2.30253e-09	slc2a11l	10	17485945	17501528	-	2163	protein_coding	solute carrier family 2 (facilitated glucose transporter), member 11-like [Source:ZFIN;Acc:ZDB-GENE-061215-118]	Sugar_tr	146	147	24	16	1.98672	1.74915	0.29378	0.20775
ENSDARG00000074443	68.5117	55.1304	11.5603	5.09381	61.8211	8.32707	2.88455	2.60146e-05	0.000325294	gas7a	3	50310684	50420221	+	2669	protein_coding	growth arrest-specific 7a [Source:ZFIN;Acc:ZDB-GENE-130128-1]	-	64	59	12	5	0.705785	0.568943	0.119042	0.0526138
ENSDARG00000079340	137.023	125.211	21.1939	14.2627	131.117	17.7283	2.8829	6.4906e-10	2.0215e-08	slc47a4	15	26616004	26636826	-	2509	protein_coding	solute carrier family 47 (multidrug and toxin extrusion), member 4 [Source:ZFIN;Acc:ZDB-GENE-130530-865]	MatE	128	134	22	14	1.50159	1.37458	0.232161	0.156713
ENSDARG00000002293	319.008	400.864	66.4719	31.5816	359.936	49.0268	2.87225	2.50735e-17	1.91953e-15	si:ch211-197g15.6	22	17460871	17463643	-	1549	protein_coding	si:ch211-197g15.6 [Source:ZFIN;Acc:ZDB-GENE-050208-457]	-	298	429	69	31	5.66247	7.12806	1.17941	0.562068
ENSDARG00000045804	31.0444	42.0486	1.92672	8.1501	36.5465	5.03841	2.87034	0.00151739	0.0107379	abhd2b	25	19120529	19139259	-	2174	protein_coding	abhydrolase domain containing 2b [Source:ZFIN;Acc:ZDB-GENE-061027-74]	Abhydrolase_1	29	45	2	8	0.392626	0.532744	0.0243578	0.10335
ENSDARG00000088625	57.8068	15.885	0.963361	9.16886	36.8459	5.06611	2.86986	0.00520561	0.0294362	si:ch211-142d6.2	7	73444325	73445871	+	810	protein_coding	si:ch211-142d6.2 [Source:ZFIN;Acc:ZDB-GENE-141216-119]	-	54	17	1	9	1.96223	0.540168	0.0326876	0.312058
ENSDARG00000045611	352.193	505.518	85.7391	31.5816	428.856	58.6604	2.86891	4.13652e-05	0.000489003	nfybb	25	28823952	28846945	+	1428	protein_coding	nuclear transcription factor Y, beta b [Source:ZFIN;Acc:ZDB-GENE-050306-25]	-	329	541	89	31	6.78123	9.75067	1.65017	0.609694
ENSDARG00000090120	67.4413	34.5733	3.85344	10.1876	51.0073	7.02053	2.86566	0.000255181	0.00236145	si:dkey-248g21.1	3	46635527	46637476	+	1127	protein_coding	si:dkey-248g21.1 [Source:ZFIN;Acc:ZDB-GENE-131119-67]	-	63	37	4	10	1.64535	0.844973	0.0939732	0.249204
ENSDARG00000070478	59.9478	98.1135	7.70689	14.2627	79.0306	10.9848	2.85384	4.16512e-06	6.50466e-05	amn1	25	28893615	28903894	+	1997	protein_coding	antagonist of mitotic exit network 1 homolog (S. cerevisiae) [Source:ZFIN;Acc:ZDB-GENE-060825-13]	-	56	105	8	14	0.825374	1.35325	0.106067	0.196892
ENSDARG00000093052	122.037	113.999	10.597	22.4128	118.018	16.5049	2.8436	1.94335e-08	4.82421e-07	c6	21	20795472	20840723	-	3002	protein_coding	complement component 6 [Source:ZFIN;Acc:ZDB-GENE-040426-1358]	Ldl_recept_a	114	122	11	22	1.11773	1.04596	0.0970175	0.205821
ENSDARG00000031952	5112.69	4429.12	720.594	611.257	4770.91	665.926	2.84008	1.70419e-104	3.73133e-101	mb	1	55137943	55145085	+	1490	protein_coding	myoglobin [Source:ZFIN;Acc:ZDB-GENE-040426-1430]	-	4776	4740	748	600	94.345	81.8761	13.2918	11.3095
ENSDARG00000021611	96.3446	159.785	12.5237	23.4315	128.065	17.9776	2.83906	2.39816e-08	5.83418e-07	si:dkey-151g10.3	23	25172682	25222673	+	4450	protein_coding	si:dkey-151g10.3 [Source:ZFIN;Acc:ZDB-GENE-090312-81]	Pkinase	90	171	13	23	0.595283	0.989012	0.0773484	0.14516
ENSDARG00000102432	34.2559	29.9013	1.92672	7.13133	32.0786	4.52903	2.83352	0.00266356	0.0171324	si:dkey-261j11.3	4	75883021	75930031	-	3627	protein_coding	si:dkey-261j11.3 [Source:ZFIN;Acc:ZDB-GENE-131122-1]	NACHT	32	32	2	7	0.259683	0.227074	0.0145999	0.0542037
ENSDARG00000035871	10606.5	6470.82	1189.75	1208.25	8538.65	1199	2.83213	4.10992e-16	2.67818e-14	rpl30	19	32855139	32860780	+	681	protein_coding	ribosomal protein L30 [Source:ZFIN;Acc:ZDB-GENE-030131-8657]	-	9908	6925	1235	1186	428.233	261.721	48.0162	48.9121
ENSDARG00000105528	107.05	63.5402	4.81681	19.3565	85.2949	12.0866	2.82565	1.53716e-05	0.000206353	si:dkey-86l18.10	7	41295974	41302753	+	926	protein_coding	si:dkey-86l18.10 [Source:ZFIN;Acc:ZDB-GENE-160728-106]	-	100	68	5	19	3.17856	1.89001	0.142964	0.576263
ENSDARG00000030215	4375.12	4356.24	605.954	645.895	4365.68	625.925	2.80243	6.90841e-132	2.16085e-128	matn1	19	43314700	43338280	+	2066	protein_coding	matrilin 1 [Source:ZFIN;Acc:ZDB-GENE-050307-3]	VWA	4087	4662	629	634	58.2258	58.0774	8.06099	8.61861
ENSDARG00000021855	247.285	384.044	57.8017	32.6004	315.664	45.201	2.80178	3.99942e-15	2.3166e-13	arnt	16	4570417	4610278	-	3628	protein_coding	aryl hydrocarbon receptor nuclear translocator [Source:ZFIN;Acc:ZDB-GENE-060126-7]	PAS	231	411	60	32	1.87407	2.91568	0.437877	0.24772
ENSDARG00000019294	95.2741	36.4422	7.70689	11.2064	65.8582	9.45664	2.7993	7.78198e-05	0.000849808	cbln8	7	73453486	73455918	+	825	protein_coding	cerebellin 8 [Source:ZFIN;Acc:ZDB-GENE-080204-13]	-	89	39	8	11	3.17524	1.21668	0.256746	0.37447
ENSDARG00000101146	171.279	170.998	32.7543	16.3002	171.139	24.5272	2.79752	5.84535e-11	2.12245e-09	CR293511.1	11	45187798	45199251	-	4415	protein_coding	-	-	160	183	34	16	1.06667	1.06681	0.203899	0.101781
ENSDARG00000111625	164.856	252.292	31.7909	30.5629	208.574	31.1769	2.7434	1.40422e-12	6.11765e-11	wu:fc75a09	1	52754085	52763447	+	5371	protein_coding	wu:fc75a09 [Source:ZFIN;Acc:ZDB-GENE-030131-4139]	-	154	270	33	30	0.84393	1.29382	0.162677	0.156872
ENSDARG00000005141	55.6658	76.622	5.78017	14.2627	66.1439	10.0214	2.73058	3.988e-05	0.000474809	camkvb	11	35364445	35441348	+	5850	protein_coding	CaM kinase-like vesicle-associated b [Source:ZFIN;Acc:ZDB-GENE-040426-1140]	Pkinase	52	82	6	14	0.26163	0.360764	0.0271558	0.0672126
ENSDARG00000045524	474.23	292.472	41.4245	74.3696	383.351	57.8971	2.72897	1.30156e-15	8.02751e-14	lamb1b	4	25704579	25751361	+	5575	protein_coding	laminin, beta 1b [Source:ZFIN;Acc:ZDB-GENE-041210-197]	Laminin_EGF	443	313	43	73	2.33884	1.44499	0.204217	0.367753
ENSDARG00000043986	186.266	130.818	15.4138	32.6004	158.542	24.0071	2.72709	2.7338e-09	7.68378e-08	setd6	25	17349265	17357165	-	1764	protein_coding	SET domain containing 6 [Source:ZFIN;Acc:ZDB-GENE-030131-1067]	SET	174	140	16	32	2.9033	2.04265	0.240154	0.509483
ENSDARG00000022430	474.23	522.338	101.153	49.9193	498.284	75.5361	2.71824	4.57945e-20	4.59941e-18	ppp1r8b	16	4513597	4531657	-	4915	protein_coding	protein phosphatase 1, regulatory subunit 8b [Source:ZFIN;Acc:ZDB-GENE-040426-1271]	FHA	443	559	105	49	2.6529	2.92721	0.565632	0.279995
ENSDARG00000089237	22.4804	35.5077	6.74353	2.03752	28.9941	4.39053	2.71668	0.00560808	0.0311726	vsig10l	16	50183190	50203058	-	1991	protein_coding	V-set and immunoglobulin domain containing 10 like [Source:ZFIN;Acc:ZDB-GENE-131127-231]	I-set	21	38	7	2	0.310448	0.491222	0.0930882	0.0282122
ENSDARG00000058463	630.522	212.112	70.3254	58.0694	421.317	64.1974	2.71368	0.000376086	0.00326762	ndufab1a	1	9118100	9123465	-	918	protein_coding	NADH dehydrogenase (ubiquinone) 1, alpha/beta subcomplex, 1a [Source:ZFIN;Acc:ZDB-GENE-040801-1]	PP-binding	589	227	73	57	18.8848	6.36427	2.10547	1.74386
ENSDARG00000028824	685.117	871.808	121.384	116.139	778.463	118.761	2.71308	2.3342e-36	7.40685e-34	slc34a1a	14	834619	858987	-	5044	protein_coding	solute carrier family 34 (type II sodium/phosphate cotransporter), member 1a [Source:ZFIN;Acc:ZDB-GENE-101006-3]	Na_Pi_cotrans	640	933	126	114	3.73461	4.76071	0.661399	0.634758
ENSDARG00000070168	39.6084	26.1636	0.963361	9.16886	32.886	5.06611	2.7087	0.00593248	0.0326279	sod3a	7	71335815	71339294	+	1125	protein_coding	superoxide dismutase 3, extracellular a [Source:ZFIN;Acc:ZDB-GENE-050309-208]	-	37	28	1	9	0.968033	0.640576	0.0235351	0.224682
ENSDARG00000058445	107.05	99.9823	15.4138	16.3002	103.516	15.857	2.7068	7.10798e-08	1.60112e-06	zgc:136472	1	9234928	9249943	-	1696	protein_coding	zgc:136472 [Source:ZFIN;Acc:ZDB-GENE-060421-2552]	-	100	107	16	16	1.73546	1.62377	0.249783	0.264955
ENSDARG00000098332	356.475	336.389	45.278	61.1257	346.432	53.2018	2.70507	2.18997e-20	2.32764e-18	zgc:112970	KN149696.2	165289	170436	-	1776	protein_coding	zgc:112970 [Source:ZFIN;Acc:ZDB-GENE-050327-83]	-	333	360	47	60	5.51877	5.21705	0.700685	0.948826
ENSDARG00000059558	164.856	101.851	33.7176	7.13133	133.354	20.4245	2.69859	2.76193e-06	4.47612e-05	tecta	5	63177355	63233216	-	6969	protein_coding	tectorin alpha [Source:ZFIN;Acc:ZDB-GENE-110411-120]	Zona_pellucida	154	109	35	7	0.650416	0.402551	0.132974	0.0282102
ENSDARG00000075963	791.097	656.893	103.08	121.233	723.995	112.156	2.6909	5.13303e-35	1.4985e-32	mhc1uba	19	7072854	7101100	+	2551	protein_coding	major histocompatibility complex class I UBA [Source:ZFIN;Acc:ZDB-GENE-990415-145]	MHC_I	739	703	107	119	8.52658	7.09268	1.11056	1.31013
ENSDARG00000100967	92.0627	101.851	4.81681	25.4691	96.9569	15.1429	2.68743	1.74564e-05	0.000230384	BX569788.1	10	44767388	44769521	+	525	lincRNA	-	-	86	109	5	25	4.82148	5.34358	0.252161	1.33739
ENSDARG00000062502	61.0183	53.2616	10.597	7.13133	57.1399	8.86415	2.68447	7.05428e-05	0.000781647	si:ch73-196l6.5	19	22318000	22328154	-	2561	protein_coding	si:ch73-196l6.5 [Source:ZFIN;Acc:ZDB-GENE-140106-79]	-	57	57	11	7	0.655098	0.572836	0.113724	0.0767656
ENSDARG00000057206	250.496	172.867	46.2413	19.3565	211.681	32.7989	2.68404	2.74997e-10	9.09526e-09	nmt1b	12	15666949	15676285	+	1577	protein_coding	N-myristoyltransferase 1b [Source:ZFIN;Acc:ZDB-GENE-081222-3]	-	234	185	48	19	4.36742	3.01929	0.805893	0.338377
ENSDARG00000070321	27.8329	42.0486	4.81681	6.11257	34.9408	5.46469	2.68074	0.00186656	0.0127239	clrn2	1	19515228	19517791	+	950	protein_coding	clarin 2 [Source:ZFIN;Acc:ZDB-GENE-061207-64]	-	26	45	5	6	0.805546	1.21914	0.139352	0.177381
ENSDARG00000100405	103.838	74.7531	9.63361	18.3377	89.2956	13.9857	2.67805	2.32766e-06	3.82613e-05	BX957252.3	4	76255295	76270790	-	2949	unprocessed_pseudogene	-	SPRY	97	80	10	18	0.968139	0.698201	0.0897828	0.171426
ENSDARG00000069978	250.496	369.094	44.3146	52.9756	309.795	48.6451	2.67359	2.58738e-16	1.73098e-14	cd28l	9	13999620	14005116	+	1042	protein_coding	cd28-like molecule [Source:ZFIN;Acc:ZDB-GENE-070912-309]	-	234	395	46	52	6.60981	9.75651	1.16885	1.40157
ENSDARG00000012881	3850.57	3319.04	621.368	508.362	3584.81	564.865	2.66499	3.91774e-80	5.7186e-77	slc4a1a	3	20065861	20092124	-	3556	protein_coding	solute carrier family 4 (anion exchanger), member 1a (Diego blood group) [Source:ZFIN;Acc:ZDB-GENE-010525-1]	Band_3_cyto	3597	3552	645	499	29.7728	25.7085	4.80248	3.9411
ENSDARG00000069292	34.2559	28.9668	1.92672	8.1501	31.6114	5.03841	2.65836	0.00474676	0.0273147	acot16	4	25651720	25666835	+	1950	protein_coding	acyl-CoA thioesterase 16 [Source:ZFIN;Acc:ZDB-GENE-041210-201]	-	32	31	2	8	0.48301	0.409159	0.0271558	0.115222
ENSDARG00000098462	38.5379	29.9013	6.74353	4.07505	34.2196	5.40929	2.65589	0.0021876	0.014532	CU570782.1	7	42367467	42387360	+	862	lincRNA	-	-	36	32	7	4	1.22924	0.95545	0.21501	0.130326
ENSDARG00000009837	552.376	599.894	76.1055	107.989	576.135	92.0472	2.64857	6.25724e-28	1.13225e-25	agk	18	20532618	20540709	+	2480	protein_coding	acylglycerol kinase [Source:ZFIN;Acc:ZDB-GENE-030131-6202]	-	516	642	79	106	6.12405	6.66267	0.843419	1.20042
ENSDARG00000102575	41.7493	25.2292	9.63361	1.01876	33.4893	5.32619	2.6394	0.00683807	0.0364193	si:ch211-106j21.2	4	76117415	76129431	-	3225	protein_coding	si:ch211-106j21.2 [Source:ZFIN;Acc:ZDB-GENE-081103-42]	NACHT	39	27	10	1	0.355939	0.215476	0.0820991	0.00870861
ENSDARG00000097333	42.8198	36.4422	9.63361	3.05629	39.631	6.34495	2.63409	0.00158013	0.011103	CT573342.1	15	17751150	17754688	-	2444	antisense	-	-	40	39	10	3	0.481725	0.410704	0.108334	0.0344745
ENSDARG00000097737	111.332	55.1304	12.5237	14.2627	83.231	13.3932	2.63375	1.11639e-05	0.000155195	si:dkey-188h10.3	3	55482160	55483481	+	777	lincRNA	si:dkey-188h10.3 [Source:ZFIN;Acc:ZDB-GENE-030131-376]	-	104	59	13	14	3.93961	1.95432	0.442986	0.506041
ENSDARG00000070844	2001.83	1925.83	274.558	360.642	1963.83	317.6	2.62957	2.16064e-61	1.89229e-58	gamt	11	5855923	5865744	-	1365	protein_coding	guanidinoacetate N-methyltransferase [Source:ZFIN;Acc:ZDB-GENE-051030-97]	-	1870	2061	285	354	40.3227	38.8607	5.52815	7.28365
ENSDARG00000068088	411.07	247.62	64.5452	41.7692	329.345	53.1572	2.62732	3.27106e-14	1.70119e-12	tcnl	5	30617915	30620625	-	655	protein_coding	transcobalamin like [Source:ZFIN;Acc:ZDB-GENE-060531-123]	-	384	265	67	41	17.2556	10.4129	2.70833	1.75801
ENSDARG00000093345	47.1018	31.7701	9.63361	3.05629	39.436	6.34495	2.62613	0.00185818	0.0126838	si:ch73-27e22.7	22	8536838	8543629	+	769	protein_coding	si:ch73-27e22.7 [Source:ZFIN;Acc:ZDB-GENE-070705-235]	-	44	34	10	3	1.6841	1.13794	0.344304	0.109565
ENSDARG00000067613	92.0627	91.5726	7.70689	22.4128	91.8176	15.0598	2.615	5.8855e-06	8.82019e-05	dnajc25	5	69950882	69960001	+	1393	protein_coding	DnaJ (Hsp40) homolog, subfamily C , member 25 [Source:ZFIN;Acc:ZDB-GENE-081104-137]	DnaJ	86	98	8	22	1.81714	1.81067	0.152057	0.443557
ENSDARG00000040942	398.225	353.209	40.4612	82.5197	375.717	61.4904	2.61478	5.2522e-16	3.36248e-14	pnp6	18	21257261	21271373	-	1984	protein_coding	purine nucleoside phosphorylase 6 [Source:ZFIN;Acc:ZDB-GENE-040426-1800]	-	372	378	42	81	5.51877	4.9036	0.5605	1.14663
ENSDARG00000104966	54.5953	77.5564	15.4138	6.11257	66.0758	10.7632	2.6131	7.69354e-05	0.000841408	si:ch211-106j21.5	4	76173376	76206413	-	5648	protein_coding	si:ch211-106j21.5 [Source:ZFIN;Acc:ZDB-GENE-081103-52]	NACHT	51	83	16	6	0.265776	0.378224	0.0750055	0.0298356
ENSDARG00000097137	6153.21	5651.34	1263.93	681.552	5902.27	972.741	2.601	2.19624e-09	6.23693e-08	CR753876.1	19	35368602	35369837	+	1236	lincRNA	-	-	5748	6048	1312	669	136.88	125.939	28.105	15.2015
ENSDARG00000087017	79.2167	11.213	6.74353	8.1501	45.2148	7.44681	2.5986	0.00512309	0.0290685	PTGR1 (1 of many)	7	24366962	24373662	-	1209	protein_coding	si:dkey-11k2.7 [Source:ZFIN;Acc:ZDB-GENE-160728-22]	ADH_zinc_N	74	12	7	8	1.80155	0.255458	0.153299	0.185841
ENSDARG00000044255	94.2037	118.671	21.1939	14.2627	106.437	17.7283	2.58391	2.64123e-07	5.32012e-06	rbm18	10	9346383	9370944	+	2367	protein_coding	RNA binding motif protein 18 [Source:ZFIN;Acc:ZDB-GENE-040426-1764]	RRM_1	88	127	22	14	1.09427	1.38093	0.246089	0.166115
ENSDARG00000030641	58.8773	58.8681	6.74353	13.2439	58.8727	9.99372	2.56364	0.000118819	0.00121738	letmd1	23	32079046	32100106	-	1656	protein_coding	LETM1 domain containing 1 [Source:ZFIN;Acc:ZDB-GENE-080723-8]	-	55	63	7	13	0.977559	0.979142	0.111919	0.220476
ENSDARG00000067794	138.094	182.211	33.7176	20.3752	160.152	27.0464	2.56356	1.89665e-09	5.44975e-08	cabz01076234.2	7	828289	847293	+	2485	protein_coding	cabz01076234.2 [Source:ZFIN;Acc:ZDB-GENE-160727-2]	V-set	129	195	35	20	1.52793	2.01964	0.372915	0.226038
ENSDARG00000100348	44.9608	53.2616	12.5237	4.07505	49.1112	8.29937	2.55816	0.000673759	0.0053918	si:dkey-71l4.1	4	76001682	76027176	-	3621	protein_coding	si:dkey-71l4.1 [Source:ZFIN;Acc:ZDB-GENE-060526-331]	NACHT	42	57	13	4	0.341398	0.405146	0.0950567	0.0310249
ENSDARG00000058030	130.601	56.0648	17.3405	14.2627	93.3327	15.8016	2.558	1.28487e-05	0.000175388	hspa14	4	9592486	9601691	+	2249	protein_coding	heat shock protein 14 [Source:ZFIN;Acc:ZDB-GENE-041210-73]	HSP70	122	60	18	14	1.59666	0.686637	0.21191	0.17483
ENSDARG00000088423	97.4151	106.523	16.3771	18.3377	101.969	17.3574	2.55587	2.7635e-07	5.55619e-06	si:ch211-66k16.28	2	45479841	45550327	+	4143	protein_coding	si:ch211-66k16.28 [Source:ZFIN;Acc:ZDB-GENE-120709-59]	-	91	114	17	18	0.646498	0.708199	0.108643	0.122021
ENSDARG00000041569	1037.31	555.042	63.5818	207.827	796.176	135.705	2.55293	0.00361719	0.0219082	ces2	18	17408470	17415609	-	1826	protein_coding	carboxylesterase 2 (intestine, liver) [Source:ZFIN;Acc:ZDB-GENE-061013-99]	COesterase	969	594	66	204	15.6194	8.37242	0.956998	3.13767
ENSDARG00000004964	294.386	332.651	78.0323	28.5253	313.519	53.2788	2.55271	1.686e-11	6.55682e-10	cyp4t8	16	4615661	4640578	-	2381	protein_coding	cytochrome P450, family 4, subfamily T, polypeptide 8 [Source:ZFIN;Acc:ZDB-GENE-031219-3]	p450	275	356	81	28	3.39949	3.84818	0.900728	0.330276
ENSDARG00000090741	23.5509	28.9668	2.89008	6.11257	26.2589	4.50133	2.55123	0.00905046	0.0454931	tor1l2	23	37539068	37546696	-	1752	protein_coding	torsin family 1 like 2 [Source:ZFIN;Acc:ZDB-GENE-121107-3]	-	22	31	3	6	0.369598	0.4554	0.0453372	0.0961824
ENSDARG00000056400	90.9922	61.6713	5.78017	20.3752	76.3317	13.0777	2.55107	8.44904e-05	0.000913088	helt	1	17593392	17595045	+	951	protein_coding	helt bHLH transcription factor [Source:ZFIN;Acc:ZDB-GENE-040824-6]	HLH	85	66	6	20	2.63075	1.78619	0.167047	0.590647
ENSDARG00000099764	18.1984	33.6389	3.85344	5.09381	25.9187	4.47363	2.53967	0.0101442	0.0496664	CR855389.1	15	32707770	32709645	+	770	lincRNA	-	-	17	36	4	5	0.649829	1.20331	0.137543	0.182372
ENSDARG00000017400	92.0627	62.6057	17.3405	9.16886	77.3342	13.2547	2.53834	2.25331e-05	0.000288179	klf1	6	8129543	8140958	+	2525	protein_coding	Kruppel-like factor 1 (erythroid) [Source:ZFIN;Acc:ZDB-GENE-980526-55]	-	86	67	18	9	1.00248	0.682934	0.188747	0.100106
ENSDARG00000089602	29.9739	56.0648	7.70689	7.13133	43.0194	7.41911	2.53796	0.00115888	0.00856062	si:dkey-217f16.1	3	3718608	3723494	-	4887	protein_coding	si:dkey-217f16.1 [Source:ZFIN;Acc:ZDB-GENE-091116-95]	-	28	60	8	7	0.168638	0.315991	0.0433427	0.0402285
ENSDARG00000044982	276.188	334.52	66.4719	39.7317	305.354	53.1018	2.52113	9.15158e-15	5.09857e-13	dhrs3a	23	21663631	21674679	+	1723	protein_coding	dehydrogenase/reductase (SDR family) member 3a [Source:ZFIN;Acc:ZDB-GENE-040801-217]	adh_short	258	358	69	39	4.40733	5.34765	1.06031	0.635708
ENSDARG00000029885	598.407	650.352	108.86	109.008	624.38	108.934	2.51933	1.5827e-31	3.6097e-29	rab41	14	33280718	33297318	-	2713	protein_coding	RAB41, member RAS oncogene family [Source:ZFIN;Acc:ZDB-GENE-040426-2686]	Ras	559	696	113	107	6.06461	6.60275	1.1028	1.10767
ENSDARG00000057912	4167.44	3750.74	515.398	865.948	3959.09	690.673	2.51929	1.19263e-11	4.722e-10	eif1axb	24	24164227	24168533	-	1994	protein_coding	eukaryotic translation initiation factor 1A, X-linked, b [Source:ZFIN;Acc:ZDB-GENE-030131-1319]	-	3893	4014	535	850	57.4646	51.8105	7.1039	11.9721
ENSDARG00000001771	33.1854	52.3272	4.81681	10.1876	42.7563	7.50221	2.51829	0.00138896	0.00996435	otol1a	2	6303639	6316167	+	1520	protein_coding	otolin 1a [Source:ZFIN;Acc:ZDB-GENE-050707-1]	Collagen	31	56	5	10	0.600287	0.948221	0.0870952	0.184771
ENSDARG00000024818	166.997	147.637	32.7543	22.4128	157.317	27.5835	2.50842	1.1647e-09	3.47901e-08	rilpl2	5	69795204	69804433	-	2009	protein_coding	Rab interacting lysosomal protein-like 2 [Source:ZFIN;Acc:ZDB-GENE-030131-6682]	-	156	158	34	22	2.28552	2.02415	0.448092	0.307554
ENSDARG00000007151	90.9922	92.507	20.2306	12.2251	91.7496	16.2279	2.49554	2.62097e-06	4.26346e-05	kcnk2b	20	591505	605512	+	1470	protein_coding	potassium channel, subfamily K, member 2b [Source:ZFIN;Acc:ZDB-GENE-051120-69]	Ion_trans_2	85	99	21	12	1.70193	1.73334	0.378242	0.229267
ENSDARG00000069853	1192.53	1253.98	196.526	246.54	1223.26	221.533	2.46653	1.87143e-45	9.10557e-43	txndc9	9	21819082	21824647	+	1814	protein_coding	thioredoxin domain containing 9 [Source:ZFIN;Acc:ZDB-GENE-030131-8569]	-	1114	1342	204	242	18.0754	19.0406	2.97756	3.74676
ENSDARG00000089572	238.721	282.193	56.8383	37.6942	260.457	47.2663	2.46011	1.76615e-13	8.57425e-12	tfpt	16	4531730	4540914	+	1032	protein_coding	TCF3 (E2A) fusion partner [Source:ZFIN;Acc:ZDB-GENE-140106-241]	-	223	302	59	37	6.36013	7.53169	1.5137	1.00693
ENSDARG00000028848	272.976	228.931	40.4612	51.9569	250.954	46.209	2.44215	1.30136e-13	6.36374e-12	lsm12a	3	22984098	22994433	+	1938	protein_coding	LSM12 homolog a [Source:ZFIN;Acc:ZDB-GENE-040516-12]	-	255	245	42	51	3.87282	3.2537	0.573804	0.739086
ENSDARG00000044002	103.838	64.4746	6.74353	24.4503	84.1563	15.5969	2.43689	0.000113539	0.00117151	cyp2x7	25	17372290	17378881	-	1728	protein_coding	cytochrome P450, family 2, subfamily X, polypeptide 7 [Source:ZFIN;Acc:ZDB-GENE-110114-2]	p450	97	69	7	24	1.65222	1.02771	0.107256	0.390073
ENSDARG00000075898	362.898	301.816	76.1055	46.8631	332.357	61.4843	2.43084	4.70624e-15	2.70454e-13	spata7	17	2684992	2721464	-	6146	protein_coding	spermatogenesis associated 7 [Source:ZFIN;Acc:ZDB-GENE-050419-61]	-	339	323	79	46	1.62348	1.35262	0.340332	0.210205
ENSDARG00000095789	42.8198	26.1636	8.67025	4.07505	34.4917	6.37265	2.42859	0.00486187	0.0278448	ccr8.1	16	9421002	9425451	-	2683	protein_coding	chemokine (C-C motif) receptor 8.1 [Source:ZFIN;Acc:ZDB-GENE-070302-1]	7tm_1	40	28	9	4	0.438814	0.268598	0.0888157	0.0418714
ENSDARG00000056233	122.037	170.063	26.0108	28.5253	146.05	27.268	2.42337	1.2612e-08	3.22217e-07	zgc:110591	7	19909774	19923249	-	2333	protein_coding	zgc:110591 [Source:ZFIN;Acc:ZDB-GENE-050522-510]	-	114	182	27	28	1.43824	2.00781	0.30642	0.337071
ENSDARG00000091222	90.9922	93.4414	24.084	10.1876	92.2168	17.1358	2.42256	1.07379e-05	0.000149749	si:dkey-190l8.2	17	30591287	30605734	+	6705	protein_coding	si:dkey-190l8.2 [Source:ZFIN;Acc:ZDB-GENE-030131-9103]	Sugar_tr	85	100	25	10	0.373131	0.383854	0.0987209	0.041887
ENSDARG00000052437	156.292	78.4908	37.5711	6.11257	117.392	21.8418	2.41852	0.000157517	0.00155493	mia	5	57653459	57655092	-	485	protein_coding	melanoma inhibitory activity [Source:ZFIN;Acc:ZDB-GENE-081022-66]	SH3_2	146	84	39	6	8.86037	4.45762	2.12907	0.347446
ENSDARG00000056762	112.402	98.1135	23.1207	16.3002	105.258	19.7104	2.41364	8.04896e-07	1.47322e-05	zgc:172079	7	26446020	26457812	-	2311	protein_coding	zgc:172079 [Source:ZFIN;Acc:ZDB-GENE-080204-103]	-	105	105	24	16	1.3373	1.16938	0.274966	0.194446
ENSDARG00000009899	235.509	264.439	50.0948	44.8255	249.974	47.4602	2.39674	8.21314e-14	4.10563e-12	znf385a	23	28185883	28294763	-	2409	protein_coding	zinc finger protein 385A [Source:ZFIN;Acc:ZDB-GENE-090313-255]	-	220	283	52	44	2.68798	3.02353	0.571524	0.512973
ENSDARG00000037097	73.8642	67.2778	10.597	16.3002	70.571	13.4486	2.39435	5.04858e-05	0.000582395	slc7a2	14	30367602	30390145	-	4199	protein_coding	solute carrier family 7 (cationic amino acid transporter, y+ system), member 2 [Source:ZFIN;Acc:ZDB-GENE-041212-5]	-	69	72	11	16	0.483664	0.441318	0.0693609	0.107017
ENSDARG00000105561	218.381	180.342	45.278	30.5629	199.362	37.9204	2.39084	1.17753e-10	4.09888e-09	BX072554.2	7	28253644	28258626	+	1259	transcribed_unprocessed_pseudogene	-	-	204	193	47	30	4.7692	3.94545	0.988417	0.669228
ENSDARG00000111396	147.728	144.834	24.084	32.6004	146.281	28.3422	2.36983	1.03162e-08	2.67306e-07	zgc:173552	25	36365567	36365977	-	411	protein_coding	zgc:173552 [Source:ZFIN;Acc:ZDB-GENE-080220-24]	Histone	138	155	25	32	9.88276	9.70633	1.61052	2.18669
ENSDARG00000093354	113.473	119.605	25.0474	20.3752	116.539	22.7113	2.35806	2.4289e-07	4.91959e-06	si:ch211-57i17.2	20	46736682	46739927	-	2453	protein_coding	si:ch211-57i17.2 [Source:ZFIN;Acc:ZDB-GENE-041014-258]	SET	106	128	26	20	1.27189	1.34301	0.280636	0.228987
ENSDARG00000003308	480.653	526.075	107.896	88.6323	503.364	98.2644	2.35597	3.71998e-23	4.9664e-21	emc2	16	38659475	38729606	+	1475	protein_coding	ER membrane protein complex subunit 2 [Source:ZFIN;Acc:ZDB-GENE-040625-82]	-	449	563	112	87	8.95973	9.82385	2.01045	1.65655
ENSDARG00000052905	751.488	412.077	117.53	110.026	581.782	113.778	2.35261	1.8585e-16	1.26372e-14	zgc:165423	3	39540014	39550089	+	2123	protein_coding	zgc:165423 [Source:ZFIN;Acc:ZDB-GENE-070720-11]	Trypsin	702	441	122	108	9.73258	5.34631	1.52152	1.42874
ENSDARG00000030872	93.1332	73.8187	15.4138	17.319	83.4759	16.3664	2.35031	1.30141e-05	0.000177315	cetp	18	17611627	17621826	+	1789	protein_coding	cholesteryl ester transfer protein, plasma [Source:ZFIN;Acc:ZDB-GENE-041114-54]	-	87	79	16	17	1.43136	1.13653	0.236798	0.266881
ENSDARG00000079914	183.055	174.735	35.6444	34.6379	178.895	35.1411	2.34743	2.1214e-10	7.14585e-09	stoml3a	15	3246323	3252727	-	934	protein_coding	stomatin (EPB72)-like 3a [Source:ZFIN;Acc:ZDB-GENE-070620-18]	-	171	187	37	34	5.38877	5.153	1.04887	1.02238
ENSDARG00000074071	92.0627	115.867	10.597	30.5629	103.965	20.5799	2.34349	1.76843e-05	0.000232972	mrnip	14	16765791	16775249	-	6147	protein_coding	MRN complex interacting protein [Source:ZFIN;Acc:ZDB-GENE-051113-228]	-	86	124	11	30	0.41179	0.519187	0.0473803	0.137068
ENSDARG00000099023	55.6658	61.6713	1.92672	21.394	58.6686	11.6604	2.33976	0.00338621	0.0207828	CABZ01034698.1	22	8012532	8018914	+	2501	protein_coding	-	V-set	52	66	2	21	0.61197	0.679197	0.0211731	0.235822
ENSDARG00000058068	55.6658	48.5895	13.4871	7.13133	52.1277	10.3092	2.33295	0.000685306	0.00546821	tnfsf10l4	5	22579975	22583542	+	1130	protein_coding	tumor necrosis factor (ligand) superfamily, member 10 like 4 [Source:ZFIN;Acc:ZDB-GENE-050227-6]	-	52	52	14	7	1.35446	1.18438	0.328033	0.173979
ENSDARG00000058256	64.2298	88.7693	13.4871	17.319	76.4996	15.403	2.31563	4.42872e-05	0.000520007	draxin	11	15931188	16013114	+	8617	protein_coding	dorsal inhibitory axon guidance protein [Source:ZFIN;Acc:ZDB-GENE-050913-20]	-	60	95	14	17	0.204944	0.283748	0.043017	0.0554078
ENSDARG00000088825	29.9739	57.9337	11.5603	6.11257	43.9538	8.83645	2.31318	0.00272569	0.0174755	citb	8	3820134	3923378	+	4749	protein_coding	citron rho-interacting serine/threonine kinase b [Source:ZFIN;Acc:ZDB-GENE-131030-2]	CNH	28	62	12	6	0.173539	0.336012	0.0669032	0.0354836
ENSDARG00000000542	109.191	91.5726	26.0108	14.2627	100.382	20.1367	2.31279	5.70887e-06	8.59668e-05	gtf2e1	9	27688274	27720612	-	6403	protein_coding	general transcription factor IIE, polypeptide 1, alpha [Source:ZFIN;Acc:ZDB-GENE-041210-221]	TFIIE_alpha	102	98	27	14	0.468875	0.39392	0.111647	0.0614077
ENSDARG00000045638	228.016	262.57	52.9849	46.8631	245.293	49.924	2.29652	9.12866e-13	4.07902e-11	slc13a1	25	27923846	27932723	+	2571	protein_coding	solute carrier family 13 member 1 [Source:ZFIN;Acc:ZDB-GENE-031222-3]	Na_sulph_symp	213	281	55	46	2.43848	2.813	0.566407	0.502498
ENSDARG00000057429	57.8068	34.5733	8.67025	10.1876	46.1901	9.42894	2.29104	0.00162356	0.0113246	arg1	12	9597151	9617770	-	1041	protein_coding	arginase 1 [Source:ZFIN;Acc:ZDB-GENE-040724-181]	-	54	37	9	10	1.52681	0.914779	0.228907	0.269791
ENSDARG00000036329	1433.39	1123.17	255.291	267.934	1278.28	261.613	2.28824	7.43729e-38	2.58475e-35	ndufa1	14	33413980	33415439	+	1234	protein_coding	NADH dehydrogenase (ubiquinone) 1 alpha subcomplex, 1 [Source:ZFIN;Acc:ZDB-GENE-040625-168]	-	1339	1202	265	263	31.9379	25.07	5.68589	5.98575
ENSDARG00000075827	100.627	31.7701	4.81681	22.4128	66.1984	13.6148	2.28466	0.00310463	0.0193829	f7i	1	127250	134079	+	2467	protein_coding	coagulation factor VIIi [Source:ZFIN;Acc:ZDB-GENE-021206-10]	Trypsin	94	34	5	22	1.1215	0.354711	0.0536622	0.250456
ENSDARG00000087165	112.402	42.9831	12.5237	19.3565	77.6926	15.9401	2.28423	0.000320733	0.00285698	si:dkeyp-69c1.7	21	22630297	22634926	+	1959	protein_coding	si:dkeyp-69c1.7 [Source:ZFIN;Acc:ZDB-GENE-091204-69]	-	105	46	13	19	1.5776	0.60435	0.175702	0.272394
ENSDARG00000045316	594.125	561.583	102.116	137.533	577.854	119.825	2.27129	4.24131e-23	5.59419e-21	map7d2b	24	24118193	24163201	-	6261	protein_coding	MAP7 domain containing 2b [Source:ZFIN;Acc:ZDB-GENE-091118-82]	-	555	601	106	135	2.6091	2.47056	0.44826	0.605576
ENSDARG00000090847	989.138	791.449	166.661	202.734	890.294	184.698	2.26939	2.76478e-29	5.35707e-27	si:ch211-209l18.4	22	6632702	6651382	-	3747	protein_coding	si:ch211-209l18.4 [Source:ZFIN;Acc:ZDB-GENE-110411-221]	I-set	924	847	173	199	7.2582	5.81788	1.22245	1.49158
ENSDARG00000003970	469.948	533.55	95.3728	114.101	501.749	104.737	2.26184	1.33948e-21	1.57677e-19	trim35-13	3	52607039	52614747	-	1551	protein_coding	tripartite motif containing 35-13 [Source:ZFIN;Acc:ZDB-GENE-110920-5]	SPRY	439	571	99	112	8.33093	9.47523	1.69002	2.02808
ENSDARG00000098928	24.6214	51.3928	4.81681	11.2064	38.0071	8.01159	2.2545	0.00686524	0.0365107	si:ch211-196h24.1	4	47876171	47907917	-	5167	protein_coding	si:ch211-196h24.1 [Source:ZFIN;Acc:ZDB-GENE-081103-12]	NACHT	23	55	5	11	0.131018	0.273961	0.0256212	0.0597906
ENSDARG00000002194	63.1593	58.8681	17.3405	8.1501	61.0137	12.7453	2.25388	0.000429207	0.00365352	rhd	13	45496766	45523026	-	2073	protein_coding	Rh blood group, D antigen [Source:ZFIN;Acc:ZDB-GENE-051213-1]	Ammonium_transp	59	63	18	8	0.83771	0.78218	0.229901	0.108385
ENSDARG00000099846	248.355	231.735	59.7284	40.7505	240.045	50.2394	2.25365	1.31868e-11	5.1929e-10	si:ch211-154o6.3	16	21698980	21741877	+	6800	protein_coding	si:ch211-154o6.3 [Source:ZFIN;Acc:ZDB-GENE-030131-1030]	-	232	248	62	40	1.0042	0.938659	0.241407	0.165207
ENSDARG00000097118	1181.83	1019.45	254.327	208.846	1100.64	231.587	2.24728	2.75167e-35	8.14161e-33	CU693494.2	2	342478	344595	-	1056	lincRNA	-	-	1104	1091	264	205	30.7713	26.5905	6.61924	5.45216
ENSDARG00000114172	35.3264	30.8357	4.81681	9.16886	33.081	6.99283	2.24586	0.00758846	0.0395971	znf996	4	31450683	31501083	+	2377	protein_coding	zinc finger protein 996 [Source:ZFIN;Acc:ZDB-GENE-110913-147]	zf-C2H2	33	33	5	9	0.408626	0.357314	0.055694	0.106339
ENSDARG00000069290	478.512	535.419	84.7758	129.383	506.966	107.079	2.24583	1.29092e-18	1.11279e-16	bida	18	20566817	20573129	+	1743	protein_coding	BH3 interacting domain death agonist [Source:ZFIN;Acc:ZDB-GENE-050419-35]	-	447	573	88	127	7.54833	8.46102	1.33676	2.04637
ENSDARG00000105657	114.543	115.867	20.2306	28.5253	115.205	24.378	2.24301	9.54802e-07	1.72202e-05	si:cabz01080528.1	7	864492	878473	-	2292	protein_coding	si:cabz01080528.1 [Source:ZFIN;Acc:ZDB-GENE-160728-36]	-	107	124	21	28	1.37407	1.39243	0.24259	0.343101
ENSDARG00000099401	293.316	246.685	39.4978	75.3884	270.001	57.4431	2.23551	1.18217e-10	4.1085e-09	BX005103.1	25	12841940	12844002	+	490	processed_transcript	-	-	274	264	41	74	16.4587	13.8667	2.21542	4.24145
ENSDARG00000056084	22.4804	92.507	16.3771	8.1501	57.4937	12.2636	2.22964	0.00411839	0.0243972	igsf21b	23	21638258	21661916	+	2330	protein_coding	immunoglobin superfamily, member 21b [Source:ZFIN;Acc:ZDB-GENE-070424-59]	V-set	21	99	17	8	0.26528	1.09356	0.193179	0.0964301
ENSDARG00000008333	219.452	249.489	46.2413	53.9944	234.47	50.1179	2.22768	8.05548e-12	3.25415e-10	znfl2a	2	118225	122164	-	1151	protein_coding	zinc finger-like gene 2a [Source:ZFIN;Acc:ZDB-GENE-030828-7]	-	205	267	48	53	5.24227	5.97037	1.10416	1.29324
ENSDARG00000074457	65.3003	38.311	2.89008	19.3565	51.8056	11.1233	2.2255	0.00554667	0.0309176	si:dkey-96f10.1	23	12682353	12788262	-	2719	protein_coding	si:dkey-96f10.1 [Source:ZFIN;Acc:ZDB-GENE-090312-154]	-	61	41	3	19	0.660331	0.388097	0.0292133	0.196256
ENSDARG00000069189	122.037	142.965	19.2672	37.6942	132.501	28.4807	2.22266	1.00818e-06	1.80787e-05	si:dkey-242h9.3	18	19120984	19124312	+	1107	protein_coding	si:dkey-242h9.3 [Source:ZFIN;Acc:ZDB-GENE-060503-347]	-	114	153	20	37	3.03108	3.55721	0.478355	0.938712
ENSDARG00000059498	103.838	65.409	24.084	12.2251	84.6236	18.1546	2.21468	9.54925e-05	0.00101446	arl16	3	50271962	50277959	-	1818	protein_coding	ADP-ribosylation factor-like 16 [Source:ZFIN;Acc:ZDB-GENE-070410-114]	Arf	97	70	25	12	1.57043	0.99099	0.364094	0.185381
ENSDARG00000037739	146.658	176.604	24.084	45.8443	161.631	34.9642	2.21328	1.22432e-07	2.63844e-06	zgc:112980	1	8539671	8553298	-	3694	protein_coding	zgc:112980 [Source:ZFIN;Acc:ZDB-GENE-050306-1]	-	137	189	25	45	1.0916	1.31683	0.179189	0.342132
ENSDARG00000056643	54.5953	72.8843	19.2672	8.1501	63.7398	13.7087	2.21319	0.000542653	0.00448808	slc22a7b.1	17	22002857	22010668	-	1914	protein_coding	solute carrier family 22 (organic anion transporter), member 7b, tandem duplicate 1 [Source:ZFIN;Acc:ZDB-GENE-040426-1311]	Sugar_tr	51	78	20	8	0.784276	1.04886	0.276666	0.117389
ENSDARG00000076904	706.527	716.696	144.504	163.002	711.612	153.753	2.21126	7.76185e-29	1.46505e-26	loxl5b	2	56012016	56041890	+	5255	protein_coding	lysyl oxidase-like 5b [Source:ZFIN;Acc:ZDB-GENE-070818-3]	-	660	767	150	160	3.69668	3.75654	0.755764	0.855117
ENSDARG00000111964	46.0313	31.7701	9.63361	7.13133	38.9007	8.38247	2.21029	0.00425236	0.0250351	CU302436.1	25	35067318	35067692	+	375	protein_coding	-	Histone	43	34	10	7	3.37503	2.33353	0.706052	0.524258
ENSDARG00000094579	40.6788	28.0324	6.74353	8.1501	34.3556	7.44681	2.20525	0.00696078	0.0368754	b4galnt2.1	3	23063718	23085279	+	1651	protein_coding	beta-1,4-N-acetyl-galactosaminyl transferase 2, tandem duplicate 1 [Source:ZFIN;Acc:ZDB-GENE-030131-9081]	Glycos_transf_2	38	30	7	8	0.67745	0.46767	0.112258	0.136088
ENSDARG00000001829	2118.51	2082.81	374.747	539.944	2100.66	457.346	2.20054	6.86918e-39	2.54916e-36	zgc:112982	24	24101811	24118451	-	3299	protein_coding	zgc:112982 [Source:ZFIN;Acc:ZDB-GENE-050306-55]	-	1979	2229	389	530	17.6565	17.3897	3.12202	4.51203
ENSDARG00000104125	137.023	156.982	35.6444	28.5253	147.003	32.0848	2.19503	5.72996e-08	1.31095e-06	ttc6	17	10258376	10315644	-	6359	protein_coding	tetratricopeptide repeat domain 6 [Source:ZFIN;Acc:ZDB-GENE-090429-2]	TPR_2	128	168	37	28	0.592464	0.679964	0.154057	0.123665
ENSDARG00000097414	140.235	163.522	31.7909	34.6379	151.879	33.2144	2.19441	2.93911e-08	7.05611e-07	si:ch211-106e7.2	25	28862660	28892882	+	5290	protein_coding	si:ch211-106e7.2 [Source:ZFIN;Acc:ZDB-GENE-031116-72]	-	131	175	33	34	0.728881	0.851427	0.165168	0.18051
ENSDARG00000021572	199.112	128.949	35.6444	36.6754	164.031	36.1599	2.17979	6.75993e-08	1.52586e-06	mb21d1	13	27328098	27332360	+	1830	protein_coding	Mab-21 domain containing 1 [Source:ZFIN;Acc:ZDB-GENE-090313-23]	-	186	138	37	36	2.99159	1.94086	0.535326	0.552497
ENSDARG00000051936	204.465	126.146	39.4978	33.6191	165.305	36.5585	2.17389	1.14002e-07	2.46892e-06	ergic2	25	20715950	20726987	+	2243	protein_coding	ERGIC and golgi 2 [Source:ZFIN;Acc:ZDB-GENE-040426-1331]	-	191	135	41	33	2.50637	1.54907	0.483975	0.413203
ENSDARG00000005004	362.898	341.996	86.7025	70.2946	352.447	78.4985	2.16507	1.13704e-15	7.09275e-14	slc5a12	25	35474987	35524166	-	2363	protein_coding	solute carrier family 5 (sodium/monocarboxylate cotransporter), member 12 [Source:ZFIN;Acc:ZDB-GENE-040426-1343]	-	339	366	90	69	4.22257	3.98642	1.00843	0.820094
ENSDARG00000094946	89.9217	50.4584	19.2672	12.2251	70.19	15.7462	2.15088	0.000400238	0.00344467	si:ch211-132b12.2	18	40572294	40583104	+	1756	protein_coding	si:ch211-132b12.2 [Source:ZFIN;Acc:ZDB-GENE-050420-178]	SNF	84	54	20	12	1.40798	0.79147	0.30156	0.191927
ENSDARG00000062266	954.882	769.023	173.405	216.996	861.953	195.201	2.14301	6.47491e-26	1.01991e-23	edc4	18	21858744	21910991	-	8173	protein_coding	enhancer of mRNA decapping 4 [Source:ZFIN;Acc:ZDB-GENE-030131-5032]	-	892	823	180	213	3.21236	2.59169	0.583121	0.731942
ENSDARG00000010477	57.8068	46.7207	13.4871	10.1876	52.2637	11.8373	2.13939	0.00117623	0.00866852	p2rx3a	14	21942383	21959712	-	3586	protein_coding	purinergic receptor P2X, ligand-gated ion channel, 3a [Source:ZFIN;Acc:ZDB-GENE-000427-3]	-	54	50	14	10	0.443225	0.35886	0.103368	0.0783192
ENSDARG00000045799	773.969	688.663	160.881	171.152	731.316	166.017	2.13904	1.95047e-27	3.41645e-25	acanb	25	19213872	19224298	-	4262	protein_coding	aggrecan b [Source:ZFIN;Acc:ZDB-GENE-100422-16]	Xlink	723	737	167	168	4.99305	4.45061	1.03746	1.10707
ENSDARG00000069672	127.389	123.343	30.8276	26.4878	125.366	28.6577	2.12794	6.54604e-07	1.21565e-05	tyw5	9	24116275	24120855	-	1962	protein_coding	tRNA-yW synthesizing protein 5 [Source:ZFIN;Acc:ZDB-GENE-060929-894]	-	119	132	32	26	1.78521	1.73157	0.431836	0.37218
ENSDARG00000044253	114.543	87.8349	29.8642	16.3002	101.189	23.0822	2.12733	2.43609e-05	0.000307958	paqr3b	10	9222476	9235446	+	2670	protein_coding	progestin and adipoQ receptor family member IIIb [Source:ZFIN;Acc:ZDB-GENE-050913-128]	-	107	94	31	16	1.17954	0.906112	0.30741	0.168301
ENSDARG00000058725	72.7937	27.098	8.67025	14.2627	49.9459	11.4665	2.12192	0.00445946	0.026086	rfesd	21	11829836	11834452	-	915	protein_coding	Rieske (Fe-S) domain containing [Source:ZFIN;Acc:ZDB-GENE-050417-254]	-	68	29	9	14	2.1874	0.815722	0.260429	0.42972
ENSDARG00000090160	155.222	232.669	49.1314	40.7505	193.946	44.9409	2.11017	1.6372e-08	4.10739e-07	si:dkey-156k2.3	4	49821234	49952636	-	11189	protein_coding	si:dkey-156k2.3 [Source:ZFIN;Acc:ZDB-GENE-110913-19]	NACHT	145	249	51	40	0.381432	0.572761	0.120683	0.100403
ENSDARG00000017985	120.966	105.589	26.9741	25.4691	113.277	26.2216	2.10992	2.58719e-06	4.22105e-05	zgc:77739	1	12394205	12400783	+	4273	protein_coding	zgc:77739 [Source:ZFIN;Acc:ZDB-GENE-040426-1862]	-	113	113	28	25	0.77837	0.68063	0.173497	0.164318
ENSDARG00000056339	88.8512	102.786	24.084	20.3752	95.8184	22.2296	2.10744	1.56099e-05	0.000209167	stk31	16	21491891	21540077	-	4526	protein_coding	serine/threonine kinase 31 [Source:ZFIN;Acc:ZDB-GENE-140106-59]	Pkinase	83	110	25	20	0.539765	0.625523	0.146249	0.124106
ENSDARG00000004643	62.0888	91.5726	13.4871	22.4128	76.8307	17.9499	2.10269	0.000212623	0.00201794	cdhr1a	13	29480010	29505946	-	4850	protein_coding	cadherin-related family member 1a [Source:ZFIN;Acc:ZDB-GENE-040924-4]	Cadherin	58	98	14	22	0.351987	0.520055	0.0764283	0.127397
ENSDARG00000105822	58.8773	48.5895	5.78017	19.3565	53.7334	12.5683	2.10159	0.00293471	0.0185411	CABZ01117780.1	4	74564192	74565834	+	1643	lincRNA	-	-	55	52	6	19	0.985294	0.814575	0.09669	0.324784
ENSDARG00000004889	489.217	433.568	74.1788	141.608	461.392	107.893	2.09867	5.47431e-13	2.51931e-11	aga	14	36428441	36437249	-	1286	protein_coding	aspartylglucosaminidase [Source:ZFIN;Acc:ZDB-GENE-040426-2311]	Asparaginase_2	457	464	77	139	10.4596	9.28629	1.58532	3.03565
ENSDARG00000057869	111.332	88.7693	19.2672	27.5066	100.05	23.3869	2.09814	1.68511e-05	0.000223745	cdc42l2	23	16956185	16960972	-	1591	protein_coding	cell division cycle 42 like 2 [Source:ZFIN;Acc:ZDB-GENE-060312-21]	Ras	104	95	20	27	1.924	1.5368	0.332834	0.47662
ENSDARG00000101450	28.9034	69.1466	5.78017	17.319	49.025	11.5496	2.09435	0.00668376	0.0358065	si:ch211-215p11.3	4	46812891	46828780	+	3398	protein_coding	si:ch211-215p11.3 [Source:ZFIN;Acc:ZDB-GENE-060531-35]	NACHT	27	74	6	17	0.233874	0.560497	0.0467515	0.140509
ENSDARG00000075541	42.8198	79.4252	11.5603	17.319	61.1225	14.4396	2.08694	0.00113775	0.00843016	si:ch73-236c18.3	1	58424507	58434252	+	2435	protein_coding	si:ch73-236c18.3 [Source:ZFIN;Acc:ZDB-GENE-121214-50]	-	40	85	12	17	0.483506	0.898432	0.130482	0.196078
ENSDARG00000033413	113.473	50.4584	20.2306	18.3377	81.9655	19.2841	2.08382	0.000344901	0.00303643	acot18	4	25691642	25704064	+	2468	protein_coding	acyl-CoA thioesterase 18 [Source:ZFIN;Acc:ZDB-GENE-041210-254]	-	106	54	21	18	1.26416	0.563137	0.22529	0.204836
ENSDARG00000059437	267.624	176.604	58.765	45.8443	222.114	52.3047	2.08323	5.37042e-09	1.44277e-07	fktn	5	69907222	69924642	-	2619	protein_coding	fukutin [Source:ZFIN;Acc:ZDB-GENE-070410-96]	-	250	189	61	45	2.80961	1.85734	0.616683	0.482564
ENSDARG00000058053	36.3969	35.5077	4.81681	12.2251	35.9523	8.52097	2.08257	0.0101332	0.0496345	serping1	8	13960655	13972626	-	2654	protein_coding	serpin peptidase inhibitor, clade G (C1 inhibitor), member 1 [Source:ZFIN;Acc:ZDB-GENE-030131-1262]	Serpin	34	38	5	12	0.377067	0.368509	0.0498812	0.126987
ENSDARG00000014805	50.3133	62.6057	13.4871	13.2439	56.4595	13.3655	2.07975	0.000911978	0.00698417	fhl5	17	15605572	15611744	-	1255	protein_coding	four and a half LIM domains 5 [Source:ZFIN;Acc:ZDB-GENE-040822-3]	LIM	47	67	14	13	1.10229	1.37403	0.29536	0.290923
ENSDARG00000013858	85.6397	49.5239	9.63361	22.4128	67.5818	16.0232	2.07879	0.00105188	0.00787383	cdc14aa	2	7075220	7105532	+	2562	protein_coding	cell division cycle 14Aa [Source:ZFIN;Acc:ZDB-GENE-040426-1214]	DSPc	80	53	10	22	0.919077	0.532429	0.103345	0.241169
ENSDARG00000030512	176.632	191.555	34.681	52.9756	184.093	43.8283	2.07344	2.10208e-08	5.15399e-07	tsnaxip1	18	21931741	21950751	-	3073	protein_coding	translin-associated factor X interacting protein 1 [Source:ZFIN;Acc:ZDB-GENE-070424-39]	-	165	205	36	52	1.58038	1.71695	0.310176	0.475247
ENSDARG00000011769	79.2167	136.424	27.9375	23.4315	107.821	25.6845	2.071	2.43207e-05	0.000307626	cpm	4	23740655	23759213	-	2093	protein_coding	carboxypeptidase M [Source:ZFIN;Acc:ZDB-GENE-041210-191]	-	74	146	29	23	1.04065	1.79535	0.366857	0.308629
ENSDARG00000099091	61.0183	75.6875	16.3771	16.3002	68.3529	16.3387	2.06583	0.000298024	0.00268528	CU929418.1	5	58416335	58417513	+	1179	lincRNA	-	-	57	81	17	16	1.42299	1.76822	0.381771	0.38114
ENSDARG00000045827	142.376	163.522	30.8276	42.788	152.949	36.8078	2.05772	2.03113e-07	4.18359e-06	lyrm5b	25	19557628	19561261	+	1323	protein_coding	LYR motif containing 5b [Source:ZFIN;Acc:ZDB-GENE-070424-20]	-	133	175	32	42	2.95892	3.40442	0.64041	0.891595
ENSDARG00000034825	408.929	271.915	104.043	61.1257	340.422	82.5844	2.03988	4.05836e-10	1.31059e-08	uspl1	10	36439293	36455985	+	3847	protein_coding	ubiquitin specific peptidase like 1 [Source:ZFIN;Acc:ZDB-GENE-040930-7]	-	382	291	108	60	2.92268	1.94687	0.743309	0.438034
ENSDARG00000101050	381.097	385.913	93.446	93.7261	383.505	93.5861	2.03496	4.46864e-16	2.8947e-14	tmc8	11	45199369	45216684	-	4177	protein_coding	transmembrane channel-like 8 [Source:ZFIN;Acc:ZDB-GENE-081114-2]	-	356	413	97	92	2.50857	2.54478	0.614859	0.618588
ENSDARG00000075664	211.958	185.948	65.5086	31.5816	198.953	48.5451	2.03098	1.83222e-07	3.81521e-06	si:ch1073-429i10.1	15	47867133	47874950	-	1832	protein_coding	si:ch1073-429i10.1 [Source:ZFIN;Acc:ZDB-GENE-120215-259]	-	198	199	68	31	3.18112	2.79571	0.982769	0.475242
ENSDARG00000088750	43.8903	28.9668	8.67025	9.16886	36.4286	8.91955	2.02819	0.00923645	0.0461717	otogl	18	6155258	6265533	+	8545	protein_coding	otogelin-like [Source:ZFIN;Acc:ZDB-GENE-050419-93]	VWD	41	31	9	9	0.141225	0.0933716	0.0278868	0.0295807
ENSDARG00000017193	74.9347	77.5564	22.1573	15.2814	76.2455	18.7194	2.02388	0.000194214	0.00187162	cnn1a	1	52214895	52222989	-	1010	protein_coding	calponin 1, basic, smooth muscle, a [Source:ZFIN;Acc:ZDB-GENE-090312-141]	CH	70	83	23	15	2.03994	2.11506	0.60294	0.417108
ENSDARG00000105351	74.9347	70.0811	16.3771	19.3565	72.5079	17.8668	2.02161	0.000235102	0.00219887	si:ch211-113d11.6	14	46233704	46238186	-	1095	protein_coding	si:ch211-113d11.6 [Source:ZFIN;Acc:ZDB-GENE-160113-62]	-	70	75	17	19	1.88159	1.76284	0.411058	0.487324
ENSDARG00000069594	133.812	125.211	44.3146	19.3565	129.512	31.8355	2.01986	1.40176e-05	0.000189689	kif13a	16	53387085	53451351	+	6053	protein_coding	kinesin family member 13A [Source:ZFIN;Acc:ZDB-GENE-090901-1]	Kinesin	125	134	46	19	0.607827	0.56977	0.201213	0.0881579
ENSDARG00000099382	41.7493	39.2454	5.78017	14.2627	40.4974	10.0214	2.0198	0.00800526	0.0414387	si:ch211-209n20.1	4	38547203	38564071	+	2170	protein_coding	si:ch211-209n20.1 [Source:ZFIN;Acc:ZDB-GENE-070705-98]	-	39	42	6	14	0.528988	0.498144	0.0732082	0.181195
ENSDARG00000004218	27.8329	83.1629	16.3771	11.2064	55.4979	13.7918	2.01063	0.00503666	0.028651	rnd1b	23	26979174	27006062	+	3115	protein_coding	Rho family GTPase 1b [Source:ZFIN;Acc:ZDB-GENE-060315-7]	Ras	26	89	17	11	0.245672	0.735355	0.144497	0.0991775
ENSDARG00000062138	329.713	295.275	61.6551	93.7261	312.494	77.6906	2.0098	1.49181e-11	5.85362e-10	ranbp10	18	21951551	22020509	+	2573	protein_coding	RAN binding protein 10 [Source:ZFIN;Acc:ZDB-GENE-070705-86]	SPRY	308	316	64	92	3.52332	3.16091	0.658579	1.00421
ENSDARG00000104387	238.721	228.931	69.362	46.8631	233.826	58.1125	2.00605	1.14526e-09	3.43031e-08	slc4a5	10	44811700	44901444	+	6488	protein_coding	solute carrier family 4 (sodium bicarbonate cotransporter), member 5 [Source:ZFIN;Acc:ZDB-GENE-091112-19]	Band_3_cyto	223	245	72	46	1.01166	0.971898	0.293826	0.199125
ENSDARG00000098096	517.05	372.831	95.3728	126.326	444.94	110.85	2.00519	7.67545e-14	3.85445e-12	slc12a1	18	5273953	5300028	+	2046	protein_coding	solute carrier family 12 (sodium/potassium/chloride transporter), member 1 [Source:ZFIN;Acc:ZDB-GENE-080130-3]	AA_permease	483	399	99	124	6.94836	5.01918	1.28114	1.70214
ENSDARG00000036189	43.8903	42.9831	12.5237	9.16886	43.4367	10.8463	1.99952	0.00458848	0.0266768	spata4	14	36393854	36397876	-	989	protein_coding	spermatogenesis associated 4 [Source:ZFIN;Acc:ZDB-GENE-050417-153]	-	41	46	13	9	1.22019	1.19709	0.348029	0.255579
ENSDARG00000090392	32.1149	51.3928	6.74353	14.2627	41.7538	10.5031	1.99778	0.00817068	0.0420784	si:dkey-71l4.2	4	75631236	75651505	-	4072	protein_coding	si:dkey-71l4.2 [Source:ZFIN;Acc:ZDB-GENE-120709-24]	NACHT	30	55	7	14	0.216847	0.347632	0.0455154	0.0965603
ENSDARG00000100552	378.956	359.749	93.446	92.7073	369.353	93.0767	1.9882	4.92164e-15	2.82092e-13	taco1	KN150328.1	3117	12840	+	1334	protein_coding	translational activator of mitochondrially encoded cytochrome c oxidase I [Source:ZFIN;Acc:ZDB-GENE-070410-35]	-	354	385	97	91	7.81067	7.42797	1.92524	1.91586
ENSDARG00000069045	292.245	274.718	42.3879	100.857	283.482	71.6227	1.9879	4.9105e-08	1.13293e-06	chtf8	18	17020967	17024878	+	1898	protein_coding	CTF8, chromosome transmission fidelity factor 8 homolog (S. cerevisiae) [Source:ZFIN;Acc:ZDB-GENE-050419-148]	-	273	294	44	99	4.23357	3.98673	0.613796	1.46493
ENSDARG00000058537	49.2428	41.1142	11.5603	11.2064	45.1785	11.3834	1.9875	0.00392744	0.0234309	si:dkey-102c8.2	22	10085572	10086446	-	641	protein_coding	si:dkey-102c8.2 [Source:ZFIN;Acc:ZDB-GENE-050208-329]	I-set	46	44	12	11	2.11223	1.76669	0.495668	0.481962
ENSDARG00000053620	123.107	57.9337	9.63361	36.6754	90.5204	23.1545	1.96959	0.00188446	0.0128297	ebi3	2	41936603	41942666	-	1036	protein_coding	Epstein-Barr virus induced 3 [Source:ZFIN;Acc:ZDB-GENE-070912-615]	-	115	62	10	36	3.26722	1.54027	0.255569	0.975935
ENSDARG00000058480	357.546	323.307	99.2262	75.3884	340.426	87.3073	1.96117	8.68034e-13	3.91062e-11	chtf18	1	9199031	9227204	+	3982	protein_coding	CTF18, chromosome transmission fidelity factor 18 homolog (S. cerevisiae) [Source:ZFIN;Acc:ZDB-GENE-050522-508]	AAA	334	346	103	74	2.4688	2.23635	0.684863	0.521926
ENSDARG00000033227	290.104	242.013	70.3254	66.2195	266.059	68.2724	1.96113	6.1993e-11	2.23614e-09	lect2l	14	36885524	36887063	+	729	protein_coding	leukocyte cell-derived chemotaxin 2 like [Source:ZFIN;Acc:ZDB-GENE-070127-4]	-	271	259	73	65	10.9416	9.14403	2.65133	2.50417
ENSDARG00000094104	499.922	916.66	205.196	158.927	708.291	182.061	1.96038	7.68527e-13	3.49831e-11	AL929237.1	20	45989179	45996430	+	1170	lincRNA	-	-	467	981	213	156	11.7482	21.5798	4.82016	3.7447
ENSDARG00000055585	49.2428	39.2454	12.5237	10.1876	44.2441	11.3557	1.95947	0.00496245	0.0283319	c1galt1a	23	28092083	28136739	+	2022	protein_coding	core 1 synthase, glycoprotein-N-acetylgalactosamine 3-beta-galactosyltransferase, 1a [Source:ZFIN;Acc:ZDB-GENE-061013-303]	Fringe	46	42	13	10	0.669603	0.534605	0.170228	0.138898
ENSDARG00000032272	125.248	137.359	47.2047	20.3752	131.303	33.79	1.9545	2.38424e-05	0.00030245	sat1b	24	21973929	21978844	+	1340	protein_coding	spermidine/spermine N1-acetyltransferase 1b [Source:ZFIN;Acc:ZDB-GENE-041001-39]	Acetyltransf_1	117	147	49	20	2.56993	2.82344	0.968187	0.419183
ENSDARG00000006786	476.371	422.355	113.677	120.214	449.363	116.945	1.94181	1.55528e-16	1.08276e-14	copz2	3	24094581	24111412	+	2255	protein_coding	coatomer protein complex, subunit zeta 2 [Source:ZFIN;Acc:ZDB-GENE-000406-5]	-	445	452	118	118	5.80837	5.1589	1.38549	1.46965
ENSDARG00000037708	274.047	503.649	98.2628	104.932	388.848	101.598	1.93832	5.0331e-10	1.60174e-08	exosc10	23	14771979	14803801	+	2964	protein_coding	exosome component 10 [Source:ZFIN;Acc:ZDB-GENE-040426-781]	3_5_exonuc	256	539	102	103	2.54216	4.68032	0.91115	0.975972
ENSDARG00000076716	71.7232	67.2778	24.084	12.2251	69.5005	18.1546	1.93243	0.000868764	0.00670719	palb2	1	9125023	9134045	-	2013	protein_coding	partner and localizer of BRCA2 [Source:ZFIN;Acc:ZDB-GENE-090313-43]	-	67	72	25	12	0.979652	0.920564	0.328824	0.167423
ENSDARG00000076310	46.0313	56.0648	12.5237	14.2627	51.0481	13.3932	1.93229	0.00280122	0.0178552	si:ch73-290k24.5	23	45584223	45606426	+	4068	protein_coding	si:ch73-290k24.5 [Source:ZFIN;Acc:ZDB-GENE-110411-284]	-	43	60	13	14	0.31112	0.379608	0.0846117	0.0966552
ENSDARG00000102889	1327.42	1339.02	334.286	364.717	1333.22	349.502	1.93198	5.73572e-37	1.87438e-34	2015-09-01	25	12853111	12906901	-	3064	protein_coding	septin 15 [Source:ZFIN;Acc:ZDB-GENE-061103-265]	GTP_CDC	1240	1433	347	358	11.9117	12.0371	2.99853	3.2815
ENSDARG00000100919	340.418	347.602	112.713	68.2571	344.01	90.4852	1.92438	4.80223e-11	1.75534e-09	slc5a2	15	14602520	14625373	-	2334	protein_coding	solute carrier family 5 (sodium/glucose cotransporter), member 2 [Source:ZFIN;Acc:ZDB-GENE-040426-2498]	-	318	372	117	67	4.01021	4.10211	1.32725	0.806218
ENSDARG00000103833	62.0888	188.752	35.6444	30.5629	125.42	33.1036	1.9242	0.00031958	0.00284787	si:dkey-77g12.1	14	15170667	15171477	-	411	protein_coding	si:dkey-77g12.1 [Source:ZFIN;Acc:ZDB-GENE-141216-292]	-	58	202	37	30	4.15362	12.6495	2.38357	2.05002
ENSDARG00000073699	1926.89	1760.44	452.78	519.569	1843.66	486.174	1.9233	1.51193e-40	5.80767e-38	col9a1a	11	11274940	11301357	-	2893	protein_coding	collagen, type IX, alpha 1a [Source:ZFIN;Acc:ZDB-GENE-080721-25]	Collagen	1800	1884	470	510	18.3132	16.7609	4.30147	4.95108
ENSDARG00000062370	616.606	595.222	140.651	179.302	605.914	159.976	1.92235	2.88619e-19	2.65517e-17	bcl2l13	18	20581685	20608300	-	5497	protein_coding	BCL2 like 13 [Source:ZFIN;Acc:ZDB-GENE-050419-215]	-	576	637	146	176	3.08416	2.98249	0.703226	0.899219
ENSDARG00000045294	386.449	482.158	138.724	90.6698	434.303	114.697	1.91976	1.36278e-12	5.95568e-11	sh3glb1a	24	28383278	28397902	+	2062	protein_coding	SH3-domain GRB2-like endophilin B1a [Source:ZFIN;Acc:ZDB-GENE-050417-89]	-	361	516	144	89	5.15299	6.4406	1.84902	1.21222
ENSDARG00000053066	122.037	104.654	41.4245	18.3377	113.345	29.8811	1.91868	8.04955e-05	0.000873798	tubb1	6	49881864	49888418	+	1473	protein_coding	tubulin, beta 1 class VI [Source:ZFIN;Acc:ZDB-GENE-110408-5]	Tubulin	114	112	43	18	2.27794	1.95695	0.772918	0.343201
ENSDARG00000069660	708.668	832.563	234.097	175.227	770.616	204.662	1.91206	3.97402e-20	4.06595e-18	chrnb1	7	22543963	22580026	+	5002	protein_coding	cholinergic receptor, nicotinic, beta 1 (muscle) [Source:ZFIN;Acc:ZDB-GENE-070821-4]	Neur_chan_memb	662	891	243	172	3.89543	4.58458	1.28627	0.965746
ENSDARG00000102900	360.757	441.043	93.446	120.214	400.9	106.83	1.91007	2.29736e-13	1.10551e-11	tacr1b	10	44769050	44788554	-	1476	protein_coding	tachykinin receptor 1b [Source:ZFIN;Acc:ZDB-GENE-091117-17]	7tm_1	337	472	97	118	6.72023	8.2304	1.74002	2.2453
ENSDARG00000093089	37.4674	51.3928	13.4871	10.1876	44.4301	11.8373	1.90811	0.00621112	0.0338374	tac3a	23	28139489	28141419	-	710	protein_coding	tachykinin 3a [Source:ZFIN;Acc:ZDB-GENE-090313-253]	-	35	55	14	10	1.45094	1.99375	0.522081	0.395567
ENSDARG00000031649	124.178	72.8843	26.0108	26.4878	98.5309	26.2493	1.90593	0.000128386	0.00130806	cort	23	28731379	28732313	+	795	protein_coding	cortistatin [Source:ZFIN;Acc:ZDB-GENE-030813-3]	-	116	78	27	26	4.29469	2.52518	0.899217	0.918511
ENSDARG00000100479	100.627	48.5895	12.5237	27.5066	74.6081	20.0151	1.89918	0.00203305	0.0136881	si:dkey-43f9.4	4	31247968	31311955	-	2463	protein_coding	si:dkey-43f9.4 [Source:ZFIN;Acc:ZDB-GENE-110913-43]	-	94	52	13	27	1.12332	0.543381	0.139748	0.307877
ENSDARG00000034174	299.739	223.325	48.1681	92.7073	261.532	70.4377	1.89432	8.61321e-08	1.90299e-06	mrrf	10	9305050	9346360	-	1446	protein_coding	mitochondrial ribosome recycling factor [Source:ZFIN;Acc:ZDB-GENE-040704-12]	-	280	239	50	91	5.69942	4.25397	0.915524	1.76747
ENSDARG00000087390	1644.28	2249.13	521.178	530.775	1946.71	525.977	1.88863	1.14461e-29	2.25777e-27	AL935210.1	3	55131289	55132052	+	582	protein_coding	-	-	1536	2407	541	521	77.68	106.443	24.6117	25.1416
ENSDARG00000026294	274.047	459.732	130.054	68.2571	366.889	99.1554	1.88678	3.71599e-08	8.78634e-07	erbb2	12	9360316	9438227	-	4098	protein_coding	erb-b2 receptor tyrosine kinase 2 [Source:ZFIN;Acc:ZDB-GENE-031118-121]	Pkinase_Tyr	256	492	135	67	1.83869	3.09	0.872227	0.459178
ENSDARG00000093931	177.702	214.915	44.3146	62.1445	196.309	53.2295	1.88562	8.62558e-08	1.9038e-06	rflnb	15	25093291	25099679	-	2410	protein_coding	refilin B [Source:ZFIN;Acc:ZDB-GENE-090409-1]	-	166	230	46	61	2.02736	2.45627	0.505369	0.710872
ENSDARG00000011498	178.773	126.146	57.8017	24.4503	152.459	41.126	1.88539	3.05988e-05	0.000374698	si:ch211-212o1.2	18	18000695	18060544	+	2441	protein_coding	si:ch211-212o1.2 [Source:ZFIN;Acc:ZDB-GENE-041111-310]	-	167	135	60	24	2.01368	1.42341	0.650806	0.276135
ENSDARG00000027687	41.7493	146.703	30.8276	20.3752	94.2262	25.6014	1.88174	0.00215242	0.0143593	tmem230a	10	19017146	19021576	+	1663	protein_coding	transmembrane protein 230a [Source:ZFIN;Acc:ZDB-GENE-040822-20]	-	39	157	32	20	0.690261	2.42981	0.509478	0.337766
ENSDARG00000076140	132.742	123.343	30.8276	38.713	128.042	34.7703	1.88171	5.59605e-06	8.45587e-05	clcf1	14	22022441	22038396	+	4183	protein_coding	cardiotrophin-like cytokine factor 1 [Source:ZFIN;Acc:ZDB-GENE-110411-244]	-	124	132	32	38	0.872518	0.812178	0.202549	0.255137
ENSDARG00000006838	94.2037	84.0973	23.1207	25.4691	89.1505	24.2949	1.87558	0.000124523	0.00127165	eef1a2	23	15850938	15878879	-	2030	protein_coding	eukaryotic translation elongation factor 1 alpha 2 [Source:ZFIN;Acc:ZDB-GENE-040718-64]	GTP_EFTU	88	90	24	25	1.27593	1.14107	0.313028	0.345878
ENSDARG00000089402	62.0888	35.5077	17.3405	9.16886	48.7983	13.2547	1.87412	0.00724039	0.0381445	si:ch73-281i18.3	19	3890506	3896514	-	934	protein_coding	si:ch73-281i18.3 [Source:ZFIN;Acc:ZDB-GENE-141212-263]	-	58	38	18	9	1.82777	1.04713	0.510262	0.270629
ENSDARG00000097353	64.2298	37.3766	15.4138	12.2251	50.8032	13.8195	1.8741	0.00495894	0.0283266	BX324164.3	4	5456500	5458959	-	569	antisense	-	-	60	40	16	12	3.1037	1.80931	0.744519	0.592308
ENSDARG00000045525	339.347	190.62	52.9849	91.6886	264.984	72.3367	1.87348	4.70677e-07	9.03197e-06	tmcc3	4	25754725	25812329	-	3507	protein_coding	transmembrane and coiled-coil domain family 3 [Source:ZFIN;Acc:ZDB-GENE-030131-1811]	-	317	204	55	90	2.66051	1.49713	0.415236	0.720751
ENSDARG00000094984	56.7363	91.5726	21.1939	19.3565	74.1544	20.2752	1.87265	0.000747627	0.00590736	si:ch211-197g15.8	22	17467591	17474781	-	1606	protein_coding	si:ch211-197g15.8 [Source:ZFIN;Acc:ZDB-GENE-050208-377]	-	53	98	22	19	0.97134	1.57053	0.362698	0.332266
ENSDARG00000041107	194.83	182.211	50.0948	52.9756	188.521	51.5352	1.87108	4.21113e-08	9.8297e-07	cftr	18	20677090	20722810	+	4814	protein_coding	cystic fibrosis transmembrane conductance regulator (ATP-binding cassette sub-family C, member 7) [Source:ZFIN;Acc:ZDB-GENE-050517-20]	ABC_membrane	182	195	52	52	1.11277	1.04254	0.285999	0.303372
ENSDARG00000074441	95.2741	67.2778	23.1207	21.394	81.276	22.2573	1.86626	0.000350913	0.00307822	gp1bb	8	4576132	4586696	-	2374	protein_coding	glycoprotein Ib (platelet), beta polypeptide [Source:ZFIN;Acc:ZDB-GENE-081104-406]	-	89	72	24	21	1.10344	0.780579	0.267669	0.248437
ENSDARG00000043126	155.222	163.522	32.7543	55.0131	159.372	43.8837	1.86369	2.14852e-06	3.56649e-05	blf	22	9917007	9923692	+	1984	protein_coding	bloody fingers [Source:ZFIN;Acc:ZDB-GENE-050721-1]	zf-C2H2	145	175	34	54	2.15113	2.27019	0.453738	0.764417
ENSDARG00000109678	867.102	669.975	280.338	143.645	768.538	211.992	1.85594	4.99342e-12	2.05896e-10	dap1b	9	52398531	52402015	+	273	protein_coding	death associated protein 1b [Source:ZFIN;Acc:ZDB-GENE-000511-4]	-	810	717	291	141	87.3299	67.5961	28.2227	14.5056
ENSDARG00000093440	103.838	125.211	29.8642	33.6191	114.525	31.7417	1.85293	2.12875e-05	0.000274655	tnfaip6	9	22764235	22779813	+	1247	protein_coding	tumor necrosis factor, alpha-induced protein 6 [Source:ZFIN;Acc:ZDB-GENE-060421-2654]	CUB	97	134	31	33	2.28953	2.76569	0.658208	0.743234
ENSDARG00000024189	153.081	114.933	39.4978	34.6379	134.007	37.0679	1.85184	6.99861e-06	0.000103119	pnocb	20	34717403	34734022	+	1260	protein_coding	prepronociceptin b [Source:ZFIN;Acc:ZDB-GENE-040114-1]	-	143	123	41	34	3.34046	2.51246	0.861552	0.757856
ENSDARG00000059060	410	424.224	104.043	128.364	417.112	116.204	1.84508	3.49993e-14	1.81161e-12	lgalsla	1	55080797	55089987	+	3020	protein_coding	lectin, galactoside-binding-like a [Source:ZFIN;Acc:ZDB-GENE-060616-24]	-	383	454	108	126	3.73278	3.86914	0.946858	1.17177
ENSDARG00000070705	361.828	264.439	83.8124	90.6698	313.133	87.2411	1.84275	1.79568e-10	6.10502e-09	zgc:64022	19	24123409	24125457	-	1519	protein_coding	zgc:64022 [Source:ZFIN;Acc:ZDB-GENE-040426-1340]	Ras	338	283	87	89	6.54937	4.79506	1.51645	1.64555
ENSDARG00000099175	3981.17	3623.66	1272.6	847.61	3802.42	1060.11	1.84205	7.01437e-29	1.33548e-26	hmgb1a	10	36026576	36032038	+	1938	protein_coding	high mobility group box 1a [Source:ZFIN;Acc:ZDB-GENE-030131-341]	HMG_box	3719	3878	1321	832	56.4824	51.5014	18.0475	12.0572
ENSDARG00000037359	59.9478	49.5239	15.4138	15.2814	54.7359	15.3476	1.83335	0.00295236	0.0186288	si:ch1073-272o11.3	12	1000323	1010416	+	2211	protein_coding	si:ch1073-272o11.3 [Source:ZFIN;Acc:ZDB-GENE-121214-325]	-	56	53	16	15	0.745487	0.616953	0.191602	0.190538
ENSDARG00000035273	83.4987	81.294	26.9741	19.3565	82.3964	23.1653	1.82845	0.000340448	0.00300327	tmtc2b	18	11858397	11909472	+	1784	protein_coding	transmembrane and tetratricopeptide repeat containing 2b [Source:ZFIN;Acc:ZDB-GENE-081031-100]	TPR_1	78	87	28	19	1.28689	1.25513	0.415557	0.299114
ENSDARG00000090116	76.0052	37.3766	10.597	21.394	56.6909	15.9955	1.82595	0.00647972	0.0349697	znf1136	4	40953320	41014777	+	2715	protein_coding	zinc finger protein 1136 [Source:ZFIN;Acc:ZDB-GENE-120709-10]	zf-C2H2	71	40	11	21	0.769714	0.379189	0.107273	0.217234
ENSDARG00000056531	1450.52	1303.51	296.715	486.968	1377.01	391.842	1.81417	1.13388e-18	9.85175e-17	nutf2	18	21913685	21929451	-	1327	protein_coding	nuclear transport factor 2 [Source:ZFIN;Acc:ZDB-GENE-041010-77]	-	1355	1395	308	478	30.0545	27.0563	6.14537	10.1166
ENSDARG00000075977	155.222	161.654	43.3513	46.8631	158.438	45.1072	1.81318	8.10231e-07	1.4808e-05	prr5a	25	21075227	21092222	-	2067	protein_coding	proline rich 5a (renal) [Source:ZFIN;Acc:ZDB-GENE-130530-791]	-	145	173	45	46	2.06475	2.15412	0.576421	0.625023
ENSDARG00000076595	73.8642	71.9499	22.1573	19.3565	72.9071	20.7569	1.81147	0.000684611	0.00546466	sema4ga	13	9678262	9760909	+	4126	protein_coding	sema domain, immunoglobulin domain (Ig), transmembrane domain (TM) and short cytoplasmic domain, (semaphorin) 4Ga [Source:ZFIN;Acc:ZDB-GENE-060503-381]	Sema	69	77	23	19	0.492222	0.480316	0.147593	0.129331
ENSDARG00000038133	66.3708	69.1466	18.3039	20.3752	67.7587	19.3396	1.80975	0.00104614	0.00784664	zgc:113411	3	24640946	24649894	+	2249	protein_coding	zgc:113411 [Source:ZFIN;Acc:ZDB-GENE-050417-474]	SAND	62	74	19	20	0.811415	0.846852	0.223683	0.249758
ENSDARG00000067537	120.966	112.13	26.9741	39.7317	116.548	33.3529	1.80689	3.60527e-05	0.000433722	pcsk5a	5	55265274	55349429	+	5759	protein_coding	proprotein convertase subtilisin/kexin type 5a [Source:ZFIN;Acc:ZDB-GENE-060531-130]	Peptidase_S8	113	120	28	39	0.577527	0.53629	0.12873	0.190194
ENSDARG00000101212	272.976	253.226	77.0689	73.3509	263.101	75.2099	1.80594	5.21861e-10	1.65837e-08	CU681841.1	23	45520704	45539306	-	5625	protein_coding	-	ig	255	271	80	72	1.33432	1.23997	0.376561	0.359491
ENSDARG00000099006	489.217	504.584	138.724	145.683	496.9	142.203	1.80542	1.50937e-16	1.05922e-14	CABZ01029938.1	KN150700.2	501	64827	-	10509	protein_coding	-	NACHT	457	540	144	143	1.27996	1.32251	0.362801	0.382167
ENSDARG00000010423	1107.96	869.005	344.883	220.053	988.484	282.468	1.80533	3.61787e-16	2.37166e-14	npsn	7	38653481	38659477	-	1636	protein_coding	nephrosin [Source:ZFIN;Acc:ZDB-GENE-040420-2]	Astacin	1035	930	358	216	18.6208	14.6307	5.79386	3.70808
ENSDARG00000017127	667.99	658.762	219.646	159.946	663.376	189.796	1.80393	2.4269e-17	1.86445e-15	pdzk1ip1	22	16555939	16566815	+	4276	protein_coding	PDZK1 interacting protein 1 [Source:ZFIN;Acc:ZDB-GENE-030616-128]	-	624	705	228	157	4.29524	4.24343	1.41177	1.03119
ENSDARG00000114797	138.094	125.211	28.9008	46.8631	131.653	37.8819	1.79932	1.96312e-05	0.000256458	rab3b	22	17203752	17213264	+	5237	protein_coding	RAB3B, member RAS oncogene family [Source:ZFIN;Acc:ZDB-GENE-050208-660]	Ras	129	134	30	46	0.725017	0.658548	0.151672	0.246691
ENSDARG00000076229	733.29	766.22	247.584	183.377	749.755	215.48	1.79773	8.75263e-19	7.72738e-17	mkl1b	12	18718065	18787459	+	4958	protein_coding	megakaryoblastic leukemia (translocation) 1b [Source:ZFIN;Acc:ZDB-GENE-030131-681]	SAP	685	820	257	180	4.06654	4.2567	1.37244	1.01963
ENSDARG00000098976	58.8773	33.6389	15.4138	11.2064	46.2581	13.3101	1.79251	0.0097255	0.0480352	CU457778.1	KN147651.2	199184	204354	-	3336	protein_coding	-	-	55	36	16	11	0.485263	0.277742	0.126988	0.0926073
ENSDARG00000045944	104.909	84.0973	26.0108	28.5253	94.5029	27.268	1.79251	0.000160535	0.00158116	slc6a1a	23	4834447	4855122	-	2429	protein_coding	solute carrier family 6 (neurotransmitter transporter), member 1a [Source:ZFIN;Acc:ZDB-GENE-060519-23]	SNF	98	90	27	28	1.18752	0.953631	0.294309	0.323749
ENSDARG00000036135	326.501	231.735	73.2154	88.6323	279.118	80.9239	1.78573	6.37408e-09	1.69575e-07	bbox1	7	34296789	34315291	+	3880	protein_coding	butyrobetaine (gamma), 2-oxoglutarate dioxygenase (gamma-butyrobetaine hydroxylase) 1 [Source:ZFIN;Acc:ZDB-GENE-050417-218]	-	305	248	76	87	2.31371	1.64507	0.518621	0.629747
ENSDARG00000101307	65.3003	73.8187	25.0474	15.2814	69.5595	20.1644	1.78423	0.00143837	0.0102516	pcdh1gb2	10	21677058	21818583	+	2904	protein_coding	protocadherin 1 gamma b 2 [Source:ZFIN;Acc:ZDB-GENE-041118-19]	Cadherin	61	79	26	15	0.618264	0.700158	0.237053	0.145068
ENSDARG00000070343	354.334	227.063	71.2887	97.8012	290.698	84.5449	1.78149	3.38407e-08	8.07127e-07	hoxc6a	23	36115541	36116907	+	757	protein_coding	homeobox C6a [Source:ZFIN;Acc:ZDB-GENE-990415-113]	Homeobox	331	243	74	96	12.8698	8.26182	2.58824	3.56167
ENSDARG00000000631	749.347	935.349	236.987	253.672	842.348	245.329	1.78078	1.43793e-20	1.55091e-18	ptpn4a	9	28939912	29029980	-	6116	protein_coding	protein tyrosine phosphatase, non-receptor type 4a [Source:ZFIN;Acc:ZDB-GENE-030616-449]	Y_phosphatase	700	1001	246	249	3.36877	4.21242	1.06497	1.14343
ENSDARG00000095032	50.3133	67.2778	21.1939	13.2439	58.7956	17.2189	1.77054	0.00363771	0.0220204	ftr33	2	59255193	59265537	-	1628	protein_coding	finTRIM family, member 33 [Source:ZFIN;Acc:ZDB-GENE-070912-109]	zf-B_box	47	72	22	13	0.849736	1.13826	0.357797	0.224268
ENSDARG00000069496	129.53	118.671	23.1207	49.9193	124.1	36.52	1.76801	0.000116116	0.00119312	arl2	7	25047219	25049377	-	1322	protein_coding	ADP-ribosylation factor-like 2 [Source:ZFIN;Acc:ZDB-GENE-041010-19]	Arf	121	127	24	49	2.69398	2.47251	0.480671	1.04098
ENSDARG00000095224	98.4856	59.8025	26.0108	20.3752	79.1441	23.193	1.767	0.00104304	0.00782639	camkmt	13	10360444	10620794	-	4247	protein_coding	calmodulin-lysine N-methyltransferase [Source:ZFIN;Acc:ZDB-GENE-090313-49]	-	92	64	27	20	0.637597	0.387849	0.168325	0.132259
ENSDARG00000070340	178.773	180.342	53.9482	51.9569	179.557	52.9525	1.7615	2.98642e-07	5.93892e-06	hoxc5a	23	36118738	36120511	+	956	protein_coding	homeobox C5a [Source:ZFIN;Acc:ZDB-GENE-980526-533]	Homeobox	167	193	56	51	5.14161	5.19595	1.55095	1.49827
ENSDARG00000006588	13931.4	16308.3	5021.04	3903.9	15119.9	4462.47	1.76046	1.74247e-41	6.93662e-39	zgc:111983	1	45173421	45177401	-	2242	protein_coding	zgc:111983 [Source:ZFIN;Acc:ZDB-GENE-050417-335]	-	13014	17453	5212	3832	170.85	200.355	61.5512	48.003
ENSDARG00000087483	185.196	189.686	37.5711	73.3509	187.441	55.461	1.76004	4.04115e-06	6.33364e-05	si:dkey-226l10.6	24	24170914	24177641	+	3501	protein_coding	si:dkey-226l10.6 [Source:ZFIN;Acc:ZDB-GENE-030131-1550]	THAP	173	203	39	72	1.45444	1.49234	0.294945	0.577589
ENSDARG00000042811	392.872	389.651	118.493	113.083	391.261	115.788	1.75634	3.10159e-13	1.47629e-11	fgf1b	21	44112914	44116241	+	1844	protein_coding	fibroblast growth factor 1b [Source:ZFIN;Acc:ZDB-GENE-071004-7]	-	367	417	123	111	5.85795	5.82023	1.76609	1.6906
ENSDARG00000062978	67.4413	53.2616	16.3771	19.3565	60.3514	17.8668	1.7558	0.00275402	0.0176107	ccdc151	6	8250382	8264751	-	1846	protein_coding	coiled-coil domain containing 151 [Source:ZFIN;Acc:ZDB-GENE-061013-787]	-	63	57	17	19	1.0045	0.79471	0.243829	0.289068
ENSDARG00000038609	252.637	213.046	63.5818	74.3696	232.842	68.9757	1.7552	1.96448e-08	4.87115e-07	mpz	2	44259482	44283554	-	3838	protein_coding	myelin protein zero [Source:ZFIN;Acc:ZDB-GENE-010724-4]	V-set	236	228	66	73	1.80987	1.52896	0.45531	0.534191
ENSDARG00000021389	178.773	199.965	43.3513	69.2758	189.369	56.3135	1.75255	1.13058e-06	2.00763e-05	jag2b	20	21391181	21475620	+	6808	protein_coding	jagged 2b [Source:ZFIN;Acc:ZDB-GENE-011128-3]	EGF	167	214	45	68	0.722001	0.80902	0.175009	0.280523
ENSDARG00000102066	83.4987	97.1791	22.1573	31.5816	90.3389	26.8695	1.75224	0.00033264	0.00295188	ntn4	7	19334314	19369002	-	2527	protein_coding	netrin 4 [Source:ZFIN;Acc:ZDB-GENE-050310-1]	NTR	78	104	23	31	0.908511	1.05924	0.240985	0.344536
ENSDARG00000062177	194.83	264.439	69.362	67.2383	229.635	68.3001	1.75065	5.79478e-08	1.32439e-06	dcbld2	9	30013667	30054178	-	2158	protein_coding	discoidin, CUB and LCCL domain containing 2 [Source:ZFIN;Acc:ZDB-GENE-070112-1822]	F5_F8_type_C	182	283	72	66	2.48234	3.37521	0.883383	0.858956
ENSDARG00000100774	57.8068	38.311	16.3771	12.2251	48.0589	14.3011	1.74476	0.00875559	0.0444376	cmc4	21	44557006	44557513	+	423	protein_coding	C-x(9)-C motif containing 4 homolog (S. cerevisiae) [Source:ZFIN;Acc:ZDB-GENE-120216-1]	-	54	41	17	12	3.75746	2.49465	1.06409	0.796745
ENSDARG00000070394	213.029	167.26	40.4612	73.3509	190.144	56.906	1.74216	4.26623e-06	6.63417e-05	uroc1	6	40045035	40058686	-	2677	protein_coding	urocanate hydratase 1 [Source:ZFIN;Acc:ZDB-GENE-081022-148]	Urocanase	199	179	42	72	2.18799	1.72096	0.415402	0.755375
ENSDARG00000071048	117.755	129.884	41.4245	32.6004	123.819	37.0125	1.74128	2.75008e-05	0.000340831	wisp3	20	276753	284865	-	1561	protein_coding	WNT1 inducible signaling pathway protein 3 [Source:ZFIN;Acc:ZDB-GENE-041001-86]	-	110	139	43	32	2.0741	2.2918	0.729346	0.575739
ENSDARG00000097947	125.248	112.13	33.7176	37.6942	118.689	35.7059	1.733	3.61121e-05	0.000434197	mespbb	25	11025903	11026907	-	860	protein_coding	mesoderm posterior bb [Source:ZFIN;Acc:ZDB-GENE-110609-1]	HLH	117	120	35	37	4.00431	3.59127	1.07755	1.20832
ENSDARG00000052122	181.984	57.9337	36.6077	35.6567	119.959	36.1322	1.72781	0.00133024	0.00962197	rag1	25	9003230	9009902	+	5426	protein_coding	recombination activating gene 1 [Source:ZFIN;Acc:ZDB-GENE-990415-234]	-	170	62	38	35	0.922168	0.294088	0.185426	0.181162
ENSDARG00000069378	255.849	199.965	69.362	68.2571	227.907	68.8095	1.72646	5.30096e-08	1.21789e-06	pard6a	18	22028674	22094102	-	3890	protein_coding	par-6 family cell polarity regulator alpha [Source:ZFIN;Acc:ZDB-GENE-070705-215]	PDZ	239	214	72	67	1.80838	1.41589	0.490062	0.483731
ENSDARG00000068562	638.016	701.745	211.939	193.565	669.88	202.752	1.72416	1.08043e-18	9.46238e-17	rbm33a	7	40900212	40959867	-	10699	protein_coding	RNA binding motif protein 33a [Source:ZFIN;Acc:ZDB-GENE-140106-90]	-	596	751	220	190	1.63962	1.8066	0.544437	0.498757
ENSDARG00000055991	778.251	574.665	203.269	206.809	676.458	205.039	1.72111	1.21397e-15	7.5297e-14	hmbsb	15	23511407	23529945	-	2850	protein_coding	hydroxymethylbilane synthase, b [Source:ZFIN;Acc:ZDB-GENE-050522-491]	-	727	615	211	203	7.50811	5.55387	1.96022	2.00046
ENSDARG00000029019	584.491	438.24	173.405	138.552	511.366	155.978	1.711	1.5032e-12	6.50447e-11	epb41b	16	26449615	26488169	+	5516	protein_coding	erythrocyte membrane protein band 4.1b [Source:ZFIN;Acc:ZDB-GENE-030130-1]	Band_41	546	469	180	136	2.91346	2.18834	0.864005	0.692457
ENSDARG00000073718	309.373	310.225	105.97	83.5385	309.799	94.7541	1.70783	4.31945e-10	1.38672e-08	si:ch73-233k15.2	3	29674308	29688399	-	3071	protein_coding	si:ch73-233k15.2 [Source:ZFIN;Acc:ZDB-GENE-120215-22]	-	289	332	110	82	2.76987	2.78243	0.948377	0.749916
ENSDARG00000011537	160.574	170.998	60.6918	40.7505	165.786	50.7211	1.70686	4.29822e-06	6.67444e-05	ugt2a5	5	69868911	69876834	+	2756	protein_coding	UDP glucuronosyltransferase 2 family, polypeptide A5 [Source:ZFIN;Acc:ZDB-GENE-060929-796]	UDPGT	150	183	63	40	1.60196	1.70898	0.605242	0.407623
ENSDARG00000031616	116.684	59.8025	15.4138	38.713	88.2433	27.0634	1.7064	0.00311107	0.019402	g6pca.1	12	6023490	6033854	-	1372	protein_coding	glucose-6-phosphatase a, catalytic subunit, tandem duplicate 1 [Source:ZFIN;Acc:ZDB-GENE-031001-4]	-	109	64	16	38	2.33837	1.20058	0.308769	0.777871
ENSDARG00000099419	381.097	343.864	119.457	102.895	362.48	111.176	1.70377	1.74886e-11	6.77721e-10	CABZ01025780.1	KN150241.1	21712	38053	+	1408	protein_coding	-	Malic_M	356	368	124	101	7.44197	6.72683	2.33178	2.01464
ENSDARG00000057927	223.734	130.818	55.8749	52.9756	177.276	54.4253	1.70116	1.01142e-05	0.000141955	rps6ka3b	24	24183752	24271629	-	3190	protein_coding	ribosomal protein S6 kinase, polypeptide 3b [Source:ZFIN;Acc:ZDB-GENE-070209-74]	Pkinase	209	140	58	52	1.9284	1.12954	0.481399	0.457816
ENSDARG00000013057	373.603	233.604	93.446	93.7261	303.603	93.5861	1.69605	3.65602e-08	8.66327e-07	hoxb5a	3	23707691	23710095	+	1790	protein_coding	homeobox B5a [Source:ZFIN;Acc:ZDB-GENE-980526-70]	Homeobox	349	250	97	92	5.7387	3.59461	1.43478	1.44349
ENSDARG00000075867	71.7232	78.4908	23.1207	23.4315	75.107	23.2761	1.69069	0.00108974	0.00811557	mkl1a	3	24708685	24765127	+	4689	protein_coding	megakaryoblastic leukemia (translocation) 1a [Source:ZFIN;Acc:ZDB-GENE-121205-3]	SAP	67	84	24	23	0.420567	0.461067	0.135519	0.137761
ENSDARG00000055644	40.6788	199.965	48.1681	26.4878	120.322	37.3279	1.69002	0.00663038	0.0356092	prss60.2	6	39098397	39105480	+	1595	protein_coding	protease, serine, 60.2 [Source:ZFIN;Acc:ZDB-GENE-050320-109]	Trypsin	38	214	50	26	0.701235	3.45317	0.829998	0.457816
ENSDARG00000020252	676.554	741.925	213.866	226.165	709.239	220.016	1.68934	4.2457e-19	3.8413e-17	btbd10b	7	66112194	66133786	-	2193	protein_coding	BTB (POZ) domain containing 10b [Source:ZFIN;Acc:ZDB-GENE-080104-5]	-	632	794	222	222	8.48241	9.31852	2.68029	2.8431
ENSDARG00000097803	107.05	108.392	40.4612	26.4878	107.721	33.4745	1.6839	0.000176603	0.00172007	si:ch211-275j6.5	5	69747417	69783881	+	1148	protein_coding	si:ch211-275j6.5 [Source:ZFIN;Acc:ZDB-GENE-130109-1]	-	100	116	42	26	2.56389	2.60065	0.968669	0.636077
ENSDARG00000087196	1207.52	785.842	236.987	384.073	996.681	310.53	1.68249	0.000205761	0.00196148	fibinb	7	34290051	34293073	+	3023	protein_coding	fin bud initiation factor b [Source:ZFIN;Acc:ZDB-GENE-050417-423]	-	1128	841	246	377	10.9828	7.16017	2.15459	3.50253
ENSDARG00000054055	181.984	192.489	60.6918	56.0319	187.237	58.3618	1.68161	5.1581e-07	9.79502e-06	ostn	15	36228835	36249087	-	1961	protein_coding	osteocrin [Source:ZFIN;Acc:ZDB-GENE-121211-2]	-	170	206	63	55	2.5516	2.70368	0.850611	0.787705
ENSDARG00000027065	143.446	105.589	45.278	32.6004	124.518	38.9392	1.6738	8.77328e-05	0.000943472	slc38a3a	11	34824099	34914857	+	10598	protein_coding	solute carrier family 38, member 3a [Source:ZFIN;Acc:ZDB-GENE-070615-25]	Aa_trans	134	113	47	32	0.372153	0.274423	0.11742	0.0848017
ENSDARG00000058023	131.671	124.277	34.681	45.8443	127.974	40.2626	1.66959	4.01758e-05	0.000477811	BX901878.1	21	15295685	15306081	+	2985	protein_coding	-	Lectin_C	123	133	36	45	1.21283	1.14676	0.31932	0.423396
ENSDARG00000096037	677.624	777.433	257.217	201.715	727.528	229.466	1.66423	1.61908e-16	1.11829e-14	si:ch211-214j24.14	4	5249494	5253973	+	859	protein_coding	si:ch211-214j24.14 [Source:ZFIN;Acc:ZDB-GENE-110914-226]	-	633	832	267	198	21.6896	24.9285	8.22974	6.47367
ENSDARG00000073820	137.023	126.146	42.3879	40.7505	131.585	41.5692	1.66171	2.51861e-05	0.000316562	zgc:174917	14	11504504	11507426	-	2365	protein_coding	zgc:174917 [Source:ZFIN;Acc:ZDB-GENE-070928-42]	PhyH	128	135	44	40	1.59301	1.46916	0.492594	0.475015
ENSDARG00000101990	195.901	227.997	65.5086	69.2758	211.949	67.3922	1.65417	2.05757e-07	4.21426e-06	CU571315.3	3	19487707	19495814	-	1910	protein_coding	-	Trypsin	183	244	68	68	2.82006	3.28792	0.942635	0.999894
ENSDARG00000024831	511.697	352.274	149.321	125.308	431.986	137.314	1.65142	3.40517e-10	1.10947e-08	crhbp	21	7823146	7832351	+	1378	protein_coding	corticotropin releasing hormone binding protein [Source:ZFIN;Acc:ZDB-GENE-040801-196]	-	478	377	155	123	10.2099	7.04137	2.97818	2.50688
ENSDARG00000069549	616.606	561.583	189.782	185.415	589.094	187.598	1.6503	3.37614e-16	2.22652e-14	zgc:162396	9	28688574	28691972	+	1560	protein_coding	zgc:162396 [Source:ZFIN;Acc:ZDB-GENE-030131-1190]	Methyltransf_11	576	601	197	182	10.8677	9.91551	3.34356	3.27661
ENSDARG00000034568	308.303	317.701	111.75	87.6135	313.002	99.6817	1.64967	1.21581e-09	3.62178e-08	fitm2	23	25796348	25798099	-	1546	protein_coding	fat storage-inducing transmembrane protein 2 [Source:ZFIN;Acc:ZDB-GENE-050508-5]	-	288	340	116	86	5.48307	5.66024	1.98663	1.56231
ENSDARG00000078953	234.439	214.915	79.959	63.1632	224.677	71.5611	1.6489	1.4733e-07	3.13088e-06	epn3a	3	50155245	50269145	+	6493	protein_coding	epsin 3a [Source:ZFIN;Acc:ZDB-GENE-131121-324]	-	219	230	83	62	0.992749	0.911691	0.338455	0.268179
ENSDARG00000117000	189.478	228.931	63.5818	70.2946	209.205	66.9382	1.64553	3.5259e-07	6.94241e-06	AL929536.7	13	861730	865193	-	189	protein_coding	-	-	177	245	66	69	27.5646	33.3633	9.24592	10.2533
ENSDARG00000062686	57.8068	50.4584	18.3039	16.3002	54.1326	17.302	1.64408	0.0065664	0.0353246	megf11	18	19143437	19405616	-	3748	protein_coding	multiple EGF-like-domains 11 [Source:ZFIN;Acc:ZDB-GENE-060503-252]	-	54	54	19	16	0.424067	0.370817	0.134221	0.119894
ENSDARG00000026796	94.2037	209.309	37.5711	60.107	151.756	48.839	1.63997	0.000361977	0.00316261	grm1a	20	32047385	32112818	-	5021	protein_coding	glutamate receptor, metabotropic 1a [Source:ZFIN;Acc:ZDB-GENE-030131-7893]	ANF_receptor	88	224	39	59	0.515862	1.14821	0.205656	0.33002
ENSDARG00000003475	85.6397	120.539	31.7909	34.6379	103.09	33.2144	1.63628	0.000329207	0.00292414	sult1st5	23	24489077	24493811	-	1628	protein_coding	sulfotransferase family 1, cytosolic sulfotransferase 5 [Source:ZFIN;Acc:ZDB-GENE-050809-2]	Sulfotransfer_1	80	129	33	34	1.44636	2.03939	0.536695	0.586547
ENSDARG00000091956	59.9478	50.4584	21.1939	14.2627	55.2031	17.7283	1.6355	0.00719527	0.0379616	tmem184bb	3	3313950	3328097	-	1330	protein_coding	transmembrane protein 184bb [Source:ZFIN;Acc:ZDB-GENE-070705-124]	-	56	54	22	14	1.2393	1.04498	0.437965	0.295634
ENSDARG00000110192	148.799	128.015	43.3513	45.8443	138.407	44.5978	1.63336	2.35548e-05	0.000299497	CABZ01081535.1	KN149800.1	2019	18143	-	1227	protein_coding	-	-	139	137	45	45	3.33435	2.8737	0.971037	1.03002
ENSDARG00000073716	564.151	530.747	159.918	193.565	547.449	176.741	1.63172	2.16357e-14	1.1554e-12	cpxm1a	13	9575516	9608943	-	2741	protein_coding	carboxypeptidase X (M14 family), member 1a [Source:ZFIN;Acc:ZDB-GENE-030131-5284]	F5_F8_type_C	527	568	166	190	5.65904	5.33341	1.60349	1.94681
ENSDARG00000003533	1335.98	1015.71	377.638	381.017	1175.84	379.327	1.63141	4.3633e-20	4.40251e-18	col8a1b	22	28647130	28668442	-	3998	protein_coding	collagen, type VIII, alpha 1b [Source:ZFIN;Acc:ZDB-GENE-060503-140]	Collagen	1248	1087	392	374	9.18782	6.99765	2.59604	2.62728
ENSDARG00000105641	998.773	792.383	225.427	353.51	895.578	289.468	1.63007	3.34348e-13	1.58111e-11	si:ch211-98n17.5	7	34256520	34265481	-	2431	protein_coding	si:ch211-98n17.5 [Source:ZFIN;Acc:ZDB-GENE-160728-87]	-	933	848	234	347	11.2963	8.97793	2.54858	4.00888
ENSDARG00000044760	711.88	578.402	189.782	227.184	645.141	208.483	1.62964	1.01794e-14	5.59994e-13	gnaia	25	20997671	21031007	-	3744	protein_coding	guanine nucleotide binding protein (G protein), alpha inhibiting activity polypeptide a [Source:ZFIN;Acc:ZDB-GENE-030131-2229]	G-alpha	665	619	197	223	5.22789	4.2552	1.39315	1.67281
ENSDARG00000094215	150.94	187.817	55.8749	53.9944	169.379	54.9347	1.62543	4.75749e-06	7.31498e-05	BX005417.1	4	76988215	77004811	-	1827	antisense	-	-	141	201	58	53	2.27155	2.83154	0.840538	0.814734
ENSDARG00000101598	50.3133	132.687	26.9741	32.6004	91.5001	29.7872	1.62336	0.00354053	0.0215296	si:ch211-134c10.1	4	46890749	46915962	-	3849	protein_coding	si:ch211-134c10.1 [Source:ZFIN;Acc:ZDB-GENE-131122-6]	NACHT	47	142	28	32	0.35941	0.949523	0.19261	0.233497
ENSDARG00000001971	235.509	199.03	59.7284	81.501	217.27	70.6147	1.62219	6.46266e-07	1.20323e-05	cthrc1b	16	47454586	47483142	-	1066	protein_coding	collagen triple helix repeat containing 1b [Source:ZFIN;Acc:ZDB-GENE-050420-46]	-	220	213	62	80	6.07444	5.14266	1.53994	2.10771
ENSDARG00000053518	521.332	519.534	156.065	182.358	520.433	169.211	1.62163	3.74981e-14	1.92728e-12	adhfe1	2	42095487	42109575	-	1995	protein_coding	alcohol dehydrogenase, iron containing, 1 [Source:ZFIN;Acc:ZDB-GENE-040426-2070]	-	487	556	162	179	7.185	7.17294	2.15001	2.51993
ENSDARG00000095082	115.614	138.293	29.8642	52.9756	126.953	41.4199	1.61951	0.000176262	0.00171752	si:ch211-194p6.12	7	33172066	33176106	+	1860	protein_coding	si:ch211-194p6.12 [Source:ZFIN;Acc:ZDB-GENE-160728-9]	-	108	148	31	52	1.70904	2.04792	0.441282	0.785179
ENSDARG00000053209	337.206	392.454	94.4094	143.645	364.83	119.027	1.6183	4.42877e-09	1.20908e-07	smad6a	7	34182963	34192834	-	2781	protein_coding	SMAD family member 6a [Source:ZFIN;Acc:ZDB-GENE-011015-1]	MH2	315	420	98	141	3.33388	3.88699	0.933024	1.42396
ENSDARG00000041140	472.089	667.172	215.793	155.871	569.63	185.832	1.61598	7.11284e-11	2.54055e-09	ddb2	18	20468157	20482855	+	3815	protein_coding	damage-specific DNA binding protein 2 [Source:ZFIN;Acc:ZDB-GENE-050419-169]	-	441	714	224	153	3.4024	4.81691	1.55461	1.12635
ENSDARG00000025495	145.587	123.343	53.9482	33.6191	134.465	43.7837	1.61558	8.82551e-05	0.000948158	nhlh2	9	32978302	32981660	+	2340	protein_coding	nescient helix loop helix 2 [Source:ZFIN;Acc:ZDB-GENE-040426-1809]	HLH	136	132	56	33	1.71066	1.45186	0.633636	0.396074
ENSDARG00000069548	404.648	361.618	118.493	132.439	383.133	125.466	1.61056	4.06181e-11	1.49468e-09	zgc:162780	9	28693592	28696999	+	1555	protein_coding	zgc:162780 [Source:ZFIN;Acc:ZDB-GENE-070410-92]	Methyltransf_11	378	387	123	130	7.15488	6.40539	2.09432	2.34796
ENSDARG00000061480	72.7937	71.0155	10.597	36.6754	71.9046	23.6362	1.60978	0.00878612	0.0444894	si:ch211-132b12.1	18	40552620	40565776	+	1937	protein_coding	si:ch211-132b12.1 [Source:ZFIN;Acc:ZDB-GENE-050420-315]	SNF	68	76	11	36	1.03328	1.00983	0.15036	0.521977
ENSDARG00000059432	100.627	75.6875	22.1573	35.6567	88.1571	28.907	1.60966	0.00128881	0.00935936	fsd1l	5	69808763	69851412	+	1909	protein_coding	fibronectin type III and SPRY domain containing 1-like [Source:ZFIN;Acc:ZDB-GENE-070501-9]	SPRY	94	81	23	35	1.44931	1.09205	0.318999	0.514921
ENSDARG00000032630	5149.09	5080.41	1788.96	1568.89	5114.75	1678.93	1.60685	6.34341e-47	3.30688e-44	neb	9	22805138	22892838	-	19942	protein_coding	nebulin [Source:ZFIN;Acc:ZDB-GENE-041111-216]	-	4810	5437	1857	1540	7.09933	7.01707	2.46553	2.16885
ENSDARG00000053449	99.5561	102.786	27.9375	38.713	101.171	33.3252	1.60408	0.000385444	0.00333437	pyya	3	33340939	33344780	+	846	protein_coding	peptide YYa [Source:ZFIN;Acc:ZDB-GENE-980526-71]	-	93	110	29	38	3.23559	3.34648	0.907602	1.26151
ENSDARG00000042990	311.514	240.144	79.959	101.876	275.829	90.9176	1.60111	7.41734e-08	1.66056e-06	cyp2p10	20	25586099	25593607	+	1806	protein_coding	cytochrome P450, family 2, subfamily P, polypeptide 10 [Source:ZFIN;Acc:ZDB-GENE-040120-1]	p450	291	257	83	100	4.7426	3.66253	1.21683	1.55511
ENSDARG00000113332	947.389	1018.51	287.082	361.661	982.95	324.371	1.6006	2.27231e-19	2.10814e-17	CABZ01084501.2	1	58870054	58880613	-	2286	protein_coding	-	-	885	1090	298	355	11.3948	12.272	3.4515	4.36145
ENSDARG00000092033	102.768	41.1142	27.9375	19.3565	71.9409	23.647	1.59992	0.0081716	0.0420784	si:dkey-239h2.3	9	18908721	18911698	-	1257	protein_coding	si:dkey-239h2.3 [Source:ZFIN;Acc:ZDB-GENE-081104-383]	-	96	44	29	19	2.2479	0.900913	0.610844	0.424519
ENSDARG00000024092	61.0183	99.9823	31.7909	21.394	80.5003	26.5925	1.59838	0.00261781	0.0168877	lmbr1	7	40658003	40708140	+	1596	protein_coding	limb development membrane protein 1 [Source:ZFIN;Acc:ZDB-GENE-090128-4]	-	57	107	33	21	1.05119	1.7255	0.547456	0.369543
ENSDARG00000098984	234.439	271.915	123.31	43.8068	253.177	83.5585	1.59686	6.38152e-05	0.000714698	pid1	18	46634371	46684352	-	1905	protein_coding	phosphotyrosine interaction domain containing 1 [Source:ZFIN;Acc:ZDB-GENE-050320-72]	-	219	291	128	43	3.38369	3.93155	1.77903	0.633945
ENSDARG00000006299	274.047	255.095	92.4827	82.5197	264.571	87.5012	1.59529	2.02454e-08	4.9806e-07	arhgef7a	9	21535885	21570566	+	8448	protein_coding	Rho guanine nucleotide exchange factor (GEF) 7a [Source:ZFIN;Acc:ZDB-GENE-060322-11]	RhoGEF	256	273	96	81	0.891922	0.831714	0.300874	0.269283
ENSDARG00000019307	89.9217	138.293	41.4245	34.6379	114.107	38.0312	1.58635	0.000346293	0.00304624	dusp5	22	29911326	29922872	-	1522	protein_coding	dual specificity phosphatase 5 [Source:ZFIN;Acc:ZDB-GENE-010625-1]	DSPc	84	148	43	34	1.62445	2.50272	0.748035	0.627397
ENSDARG00000092780	166.997	122.408	59.7284	36.6754	144.703	48.2019	1.58224	0.000109003	0.00113566	si:ch1073-170o4.1	2	9746437	9748061	-	989	protein_coding	si:ch1073-170o4.1 [Source:ZFIN;Acc:ZDB-GENE-030131-7012]	-	156	131	62	36	4.64268	3.4091	1.65983	1.02231
ENSDARG00000092044	486.005	429.831	95.3728	210.884	457.918	153.128	1.58208	3.63247e-07	7.13807e-06	si:dkey-22f5.9	21	30651064	30658520	-	2510	protein_coding	si:dkey-22f5.9 [Source:ZFIN;Acc:ZDB-GENE-091204-260]	-	454	460	99	207	5.32381	4.71682	1.04431	2.31619
ENSDARG00000107065	100.627	137.359	48.1681	31.5816	118.993	39.8748	1.57676	0.000308001	0.00276154	PEBP4	8	50531709	50705652	+	1646	protein_coding	phosphatidylethanolamine binding protein 4 [Source:HGNC Symbol;Acc:HGNC:28319]	-	94	147	50	31	1.68089	2.29854	0.804282	0.528945
ENSDARG00000095512	206.606	295.275	79.959	88.6323	250.94	84.2956	1.5759	4.51628e-07	8.68165e-06	rca2.2	23	26125676	26128664	-	1177	protein_coding	regulator of complement activation group 2 gene 2 [Source:ZFIN;Acc:ZDB-GENE-060503-646]	Sushi	193	316	83	87	4.82638	6.90997	1.86711	2.07597
ENSDARG00000045142	3952.27	4324.47	1682.99	1101.28	4138.37	1392.14	1.5714	4.19289e-21	4.70786e-19	hbae5	12	20342451	20353541	+	1262	protein_coding	hemoglobin, alpha embryonic 5 [Source:ZFIN;Acc:ZDB-GENE-101028-1]	-	3692	4628	1747	1081	86.1079	94.3842	36.6523	24.0572
ENSDARG00000102161	56.7363	93.4414	20.2306	30.5629	75.0889	25.3967	1.56845	0.00410005	0.0242951	si:ch211-148f13.1	3	51030667	51142942	-	6561	protein_coding	si:ch211-148f13.1 [Source:ZFIN;Acc:ZDB-GENE-131122-3]	fn3	53	100	21	30	0.237764	0.392279	0.0847456	0.128419
ENSDARG00000113315	321.149	375.634	121.384	114.101	348.392	117.742	1.56554	7.19752e-10	2.22899e-08	zgc:153932	12	46098784	46112892	-	2755	protein_coding	zgc:153932 [Source:ZFIN;Acc:ZDB-GENE-070209-223]	-	300	402	126	112	3.20509	3.75552	1.21092	1.14176
ENSDARG00000070491	487.076	398.995	123.31	176.246	443.035	149.778	1.56525	6.98508e-10	2.16627e-08	hpcal4	19	30517311	30565122	-	6052	protein_coding	hippocalcin like 4 [Source:ZFIN;Acc:ZDB-GENE-060503-307]	efhand	455	427	128	173	2.21286	1.81591	0.559988	0.802834
ENSDARG00000088820	207.676	181.276	69.362	62.1445	194.476	65.7532	1.56314	1.8759e-06	3.14012e-05	FP326649.1	3	240636	250145	+	1684	protein_coding	-	zf-C2H2	194	194	72	61	3.39079	2.965	1.13203	1.01734
ENSDARG00000078060	187.337	160.719	59.7284	58.0694	174.028	58.8989	1.56201	5.76528e-06	8.6697e-05	syt7b	7	13039426	13338283	+	14847	protein_coding	synaptotagmin VIIb [Source:ZFIN;Acc:ZDB-GENE-090601-6]	C2	175	172	62	57	0.346929	0.298164	0.110566	0.107824
ENSDARG00000103614	310.444	299.013	104.043	102.895	304.728	103.469	1.55806	3.22009e-09	8.97938e-08	pemt	12	1286642	1388444	+	2452	protein_coding	phosphatidylethanolamine N-methyltransferase [Source:ZFIN;Acc:ZDB-GENE-040426-719]	-	290	320	108	101	3.48111	3.35888	1.1662	1.15686
ENSDARG00000051953	931.332	910.119	360.297	264.878	920.725	312.588	1.55736	1.70956e-16	1.17338e-14	ythdc1	5	69878693	69903372	+	3112	protein_coding	YTH domain containing 1 [Source:ZFIN;Acc:ZDB-GENE-041114-114]	YTH	870	974	374	260	8.2285	8.05535	3.182	2.34645
ENSDARG00000062756	457.102	453.191	117.53	192.546	455.146	155.038	1.55547	2.49423e-09	7.03753e-08	pllp	18	18861359	18870632	+	1180	protein_coding	plasmolipin [Source:ZFIN;Acc:ZDB-GENE-050419-195]	-	427	485	122	189	10.6509	10.5785	2.73745	4.4984
ENSDARG00000017905	339.347	252.292	98.2628	102.895	295.82	100.579	1.55523	4.57282e-08	1.06174e-06	casp3a	1	17527342	17536307	+	2992	protein_coding	caspase 3, apoptosis-related cysteine peptidase a [Source:ZFIN;Acc:ZDB-GENE-011210-1]	Peptidase_C14	317	270	102	101	3.11845	2.32256	0.902623	0.948065
ENSDARG00000086189	972.01	869.005	345.847	281.178	920.508	313.512	1.55271	8.36821e-18	6.83664e-16	mgp	3	1414870	1434135	-	637	protein_coding	matrix Gla protein [Source:ZFIN;Acc:ZDB-GENE-060928-1]	-	908	930	359	276	41.9553	37.5758	14.9219	12.1688
ENSDARG00000095791	79.2167	89.7038	24.084	33.6191	84.4602	28.8516	1.55212	0.00155028	0.01094	FP067424.1	22	1018601	1019152	+	552	processed_transcript	-	-	74	96	25	33	3.94579	4.47608	1.19914	1.67901
ENSDARG00000005739	109.191	72.8843	16.3771	45.8443	91.0375	31.1107	1.55135	0.00506019	0.0287624	gpm6ba	1	28961653	29045426	-	2308	protein_coding	glycoprotein M6Ba [Source:ZFIN;Acc:ZDB-GENE-030710-9]	-	102	78	17	45	1.30078	0.869809	0.195021	0.547589
ENSDARG00000102825	58.8773	132.687	28.9008	36.6754	95.782	32.7881	1.55084	0.00304287	0.0191063	olfm2b	1	59244159	59251874	-	2537	protein_coding	olfactomedin 2b [Source:ZFIN;Acc:ZDB-GENE-040426-2402]	-	55	142	30	36	0.638092	1.44057	0.31309	0.398529
ENSDARG00000005274	80.2872	49.5239	26.9741	17.319	64.9056	22.1465	1.5466	0.00773911	0.0402872	rad52	25	21098675	21115213	+	2434	protein_coding	RAD52 homolog, DNA repair protein [Source:ZFIN;Acc:ZDB-GENE-050731-10]	-	75	53	28	17	0.906946	0.560429	0.304583	0.196158
ENSDARG00000026865	50.3133	106.523	19.2672	34.6379	78.4183	26.9526	1.54632	0.00704366	0.0372875	fam107b	18	12276567	12327478	-	1735	protein_coding	family with sequence similarity 107, member B [Source:ZFIN;Acc:ZDB-GENE-031030-12]	-	47	114	20	34	0.797332	1.69111	0.30521	0.550374
ENSDARG00000041411	467.807	683.057	161.845	235.334	575.432	198.589	1.53706	1.74447e-09	5.03894e-08	rad51	20	46427963	46442137	+	2131	protein_coding	RAD51 recombinase [Source:ZFIN;Acc:ZDB-GENE-040426-2286]	-	437	731	168	231	6.03585	8.82875	2.08734	3.04444
ENSDARG00000033367	322.219	275.652	103.08	102.895	298.936	102.987	1.53656	1.22867e-08	3.14639e-07	rrm2b	19	32916372	32928486	-	1602	protein_coding	ribonucleotide reductase M2 b [Source:ZFIN;Acc:ZDB-GENE-030616-614]	-	301	295	107	101	5.53025	4.73942	1.76844	1.77067
ENSDARG00000104956	85.6397	52.3272	25.0474	22.4128	68.9834	23.7301	1.53638	0.00553085	0.0308451	si:dkey-165o8.2	4	75690971	75708006	-	3874	protein_coding	si:dkey-165o8.2 [Source:ZFIN;Acc:ZDB-GENE-131122-2]	NACHT	80	56	26	22	0.607815	0.372043	0.177698	0.159493
ENSDARG00000101693	506.345	398.06	179.185	132.439	452.203	155.812	1.53503	7.88738e-10	2.41868e-08	CABZ01028771.1	KN150449.1	38186	54173	-	4888	protein_coding	-	-	473	426	186	130	2.8482	2.24307	1.00751	0.746948
ENSDARG00000074331	259.06	226.128	79.959	87.6135	242.594	83.7863	1.53351	2.111e-07	4.31562e-06	eif4g3b	23	21978584	22060520	+	5921	protein_coding	eukaryotic translation initiation factor 4 gamma, 3b [Source:ZFIN;Acc:ZDB-GENE-090312-49]	-	242	242	83	86	1.20299	1.05193	0.371151	0.407926
ENSDARG00000013755	35688.2	35536.7	10357.1	14272.9	35612.5	12315	1.53203	4.38585e-31	9.69983e-29	actn3a	21	27382893	27404978	+	3259	protein_coding	actinin alpha 3a [Source:ZFIN;Acc:ZDB-GENE-000329-9]	CH	33338	38031	10751	14010	301.09	300.344	87.3439	120.735
ENSDARG00000092870	1581.12	1785.67	688.803	475.762	1683.39	582.283	1.53103	6.72552e-18	5.53553e-16	BX936337.1	9	30245637	30248034	-	827	lincRNA	-	-	1477	1911	715	467	52.5673	59.4731	22.8912	15.8595
ENSDARG00000019930	170.209	174.735	58.765	61.1257	172.472	59.9454	1.52501	7.53599e-06	0.00011	tal1	22	16535575	16545330	+	2643	protein_coding	T-cell acute lymphocytic leukemia 1 [Source:ZFIN;Acc:ZDB-GENE-980526-501]	HLH	159	187	61	60	1.77068	1.821	0.611084	0.637577
ENSDARG00000016038	393.943	404.601	125.237	152.814	399.272	139.026	1.52311	1.96766e-10	6.66198e-09	hacd3	18	18982077	18995283	+	1694	protein_coding	3-hydroxyacyl-CoA dehydratase 3 [Source:ZFIN;Acc:ZDB-GENE-040426-1200]	-	368	433	130	150	6.39404	6.5787	2.03188	2.48689
ENSDARG00000061789	301.88	278.455	125.237	76.4072	290.168	100.822	1.52271	4.90876e-07	9.37847e-06	gnl1	16	21651712	21668082	-	2051	protein_coding	guanine nucleotide binding protein-like 1 [Source:ZFIN;Acc:ZDB-GENE-060323-1]	-	282	298	130	75	4.04692	3.73952	1.67821	1.02701
ENSDARG00000089119	58.8773	74.7531	17.3405	29.5441	66.8152	23.4423	1.51504	0.00685981	0.0364995	BX663516.1	10	35644719	35644798	+	80	miRNA	-	-	55	80	18	29	20.2355	25.7374	5.95731	10.1809
ENSDARG00000063207	71.7232	69.1466	29.8642	19.3565	70.4349	24.6103	1.51453	0.00466809	0.0270187	erbb4a	1	6817292	6925407	+	4613	protein_coding	erb-b2 receptor tyrosine kinase 4a [Source:ZFIN;Acc:ZDB-GENE-030918-4]	Pkinase_Tyr	67	74	31	19	0.427496	0.41287	0.177929	0.115677
ENSDARG00000014634	81.3577	142.965	24.084	55.0131	112.162	39.5486	1.509	0.00282658	0.0179698	mbtps1	18	21645309	21685055	-	4150	protein_coding	membrane-bound transcription factor peptidase, site 1 [Source:ZFIN;Acc:ZDB-GENE-030131-4909]	Peptidase_S8	76	153	25	54	0.539022	0.948874	0.1595	0.365447
ENSDARG00000042742	220.522	185.014	64.5452	78.4447	202.768	71.4949	1.50399	3.68542e-06	5.83881e-05	stx6	22	16482631	16494406	-	4271	protein_coding	syntaxin 6 [Source:ZFIN;Acc:ZDB-GENE-030131-858]	SNARE	206	198	67	77	1.41964	1.19317	0.415349	0.506337
ENSDARG00000104505	264.413	299.013	103.08	95.7636	281.713	99.4216	1.50286	4.42579e-08	1.02869e-06	CABZ01046093.1	KN150506.1	22	8927	+	2405	protein_coding	-	-	247	320	107	94	3.02289	3.42452	1.17798	1.09772
ENSDARG00000045802	294.386	285.931	84.7758	120.214	290.159	102.495	1.50275	1.34599e-07	2.87517e-06	hapln3	25	19201231	19205875	+	1993	protein_coding	hyaluronan and proteoglycan link protein 3 [Source:ZFIN;Acc:ZDB-GENE-040426-2089]	Xlink	275	306	88	118	4.06131	3.95166	1.16908	1.66285
ENSDARG00000042293	168.068	165.391	74.1788	43.8068	166.73	58.9928	1.49643	6.48976e-05	0.000725706	ca4b	15	15390882	15401917	+	1626	protein_coding	carbonic anhydrase IV b [Source:ZFIN;Acc:ZDB-GENE-080815-5]	-	157	177	77	43	2.84197	2.80168	1.25383	0.742722
ENSDARG00000077588	350.052	410.208	122.347	148.739	380.13	135.543	1.48938	2.13698e-09	6.09279e-08	pdgfc	14	35567321	35853647	-	2736	protein_coding	platelet derived growth factor c [Source:ZFIN;Acc:ZDB-GENE-071217-2]	CUB	327	439	127	146	3.51781	4.12965	1.22901	1.4987
ENSDARG00000033450	634.804	431.699	257.217	123.27	533.252	190.244	1.48627	0.00923525	0.0461717	nkap	14	33418500	33425233	-	1730	protein_coding	NFKB activating protein [Source:ZFIN;Acc:ZDB-GENE-030131-8064]	-	593	462	267	121	10.089	6.87323	4.08633	1.96434
ENSDARG00000100443	1873.37	1925.83	685.913	671.364	1899.6	678.639	1.485	1.62208e-30	3.41495e-28	CR376766.2	13	2352289	2352995	+	707	lincRNA	-	-	1750	2061	712	659	72.855	75.0281	26.6642	26.1785
ENSDARG00000061385	261.201	257.898	100.19	85.576	259.55	92.8828	1.48166	1.77963e-07	3.71804e-06	haus3	7	24390939	24398429	+	2529	protein_coding	HAUS augmin-like complex, subunit 3 [Source:ZFIN;Acc:ZDB-GENE-060929-592]	-	244	276	104	84	2.83976	2.80883	1.08881	0.932844
ENSDARG00000060085	96.3446	57.9337	31.7909	23.4315	77.1392	27.6112	1.47816	0.00538805	0.0302664	kcnq3	2	43001512	43083755	-	3711	protein_coding	potassium voltage-gated channel, KQT-like subfamily, member 3 [Source:ZFIN;Acc:ZDB-GENE-070912-301]	Ion_trans	90	62	33	23	0.713826	0.429998	0.235446	0.174067
ENSDARG00000099946	997.702	1042.81	431.586	301.554	1020.25	366.57	1.47585	1.08852e-14	5.95829e-13	fam189a2	5	52745401	52784152	-	3021	protein_coding	family with sequence similarity 189, member A2 [Source:ZFIN;Acc:ZDB-GENE-050309-90]	-	932	1116	448	296	9.08042	9.50777	3.92641	2.75182
ENSDARG00000020136	59.9478	76.622	32.7543	16.3002	68.2849	24.5272	1.47516	0.00921124	0.0461405	ptges	5	33339762	33347993	+	996	protein_coding	prostaglandin E synthase [Source:ZFIN;Acc:ZDB-GENE-050407-2]	-	56	82	34	16	1.65489	2.11895	0.903832	0.451169
ENSDARG00000005176	77.0757	98.1135	34.681	28.5253	87.5946	31.6032	1.47109	0.00203584	0.0137026	zgc:101040	18	40479684	40481028	-	1345	protein_coding	zgc:101040 [Source:ZFIN;Acc:ZDB-GENE-040801-107]	Acetyltransf_2	72	105	36	28	1.57562	2.00924	0.708677	0.584674
ENSDARG00000104367	461.384	599.894	213.866	169.114	530.639	191.49	1.47057	2.4198e-10	8.06415e-09	zgc:194469	6	13083665	13114844	-	4824	protein_coding	zgc:194469 [Source:ZFIN;Acc:ZDB-GENE-081022-114]	Peptidase_C14	431	642	222	166	2.62973	3.42526	1.21847	0.966449
ENSDARG00000005690	2102.45	2255.68	810.187	764.072	2179.06	787.129	1.46907	1.09008e-30	2.36311e-28	slc25a23a	1	54974191	54997746	-	6252	protein_coding	solute carrier family 25 (mitochondrial carrier; phosphate carrier), member 23a [Source:ZFIN;Acc:ZDB-GENE-121214-154]	Mito_carr	1964	2414	841	750	9.2462	9.93765	3.5616	3.36915
ENSDARG00000055252	220.522	230.8	108.86	53.9944	225.661	81.4271	1.46821	3.79172e-05	0.000453164	snap23.2	17	33433566	33441020	+	1474	protein_coding	synaptosomal-associated protein 23.2 [Source:ZFIN;Acc:ZDB-GENE-051030-75]	-	206	247	113	53	4.11349	4.31285	2.02978	1.00985
ENSDARG00000045144	98.4856	84.0973	40.4612	25.4691	91.2915	32.9651	1.46639	0.00216536	0.0144237	zgc:163057	12	20336070	20337274	+	760	protein_coding	zgc:163057 [Source:ZFIN;Acc:ZDB-GENE-070410-131]	-	92	90	42	25	3.56299	3.04785	1.4632	0.923857
ENSDARG00000037845	3384.91	3334.92	1125.21	1308.09	3359.92	1216.65	1.46582	1.51369e-33	3.80945e-31	col9a3	23	495514	524780	-	3113	protein_coding	collagen, type IX, alpha 3 [Source:ZFIN;Acc:ZDB-GENE-030131-9799]	Collagen	3162	3569	1168	1284	29.8967	29.5075	9.93417	11.5842
ENSDARG00000003395	89.9217	57.9337	26.9741	26.4878	73.9277	26.731	1.46514	0.00542427	0.0304368	col4a3	15	36054864	36112794	+	9726	protein_coding	collagen, type IV, alpha 3 [Source:ZFIN;Acc:ZDB-GENE-070802-4]	Collagen	84	62	28	26	0.254206	0.164068	0.076224	0.0750788
ENSDARG00000029124	204.465	235.472	77.0689	82.5197	219.969	79.7943	1.46405	1.70896e-06	2.88495e-05	adamts15a	5	30179010	30209068	+	2877	protein_coding	ADAM metallopeptidase with thrombospondin type 1 motif, 15a [Source:ZFIN;Acc:ZDB-GENE-060526-203]	TSP_1	191	252	80	81	1.95404	2.25437	0.736238	0.790721
ENSDARG00000094923	119.896	150.441	45.278	52.9756	135.168	49.1268	1.46222	0.000169949	0.00166266	CU469568.2	25	29393632	29395206	-	1575	unprocessed_pseudogene	-	UDPGT	112	161	47	52	2.09304	2.63094	0.790106	0.927259
ENSDARG00000029112	68.5117	89.7038	26.0108	31.5816	79.1078	28.7962	1.46048	0.00353602	0.0215119	gem	16	26766423	26769327	+	1538	protein_coding	GTP binding protein overexpressed in skeletal muscle [Source:ZFIN;Acc:ZDB-GENE-060825-251]	Ras	64	96	27	31	1.2248	1.6065	0.46481	0.566088
ENSDARG00000013838	525.614	814.809	265.888	222.09	670.211	243.989	1.45851	7.91081e-10	2.42248e-08	sulf2b	23	15203822	15330230	-	5177	protein_coding	sulfatase 2b [Source:ZFIN;Acc:ZDB-GENE-030131-775]	Sulfatase	491	872	276	218	2.79154	4.33514	1.41156	1.18265
ENSDARG00000077256	2688.02	2214.56	928.68	857.798	2451.29	893.239	1.4558	1.0809e-25	1.67846e-23	nat8l	7	24457191	24472991	-	5836	protein_coding	N-acetyltransferase 8-like [Source:ZFIN;Acc:ZDB-GENE-030729-4]	Acetyltransf_1	2511	2370	964	842	12.664	10.452	4.37351	4.05205
ENSDARG00000094974	132.742	163.522	88.6292	19.3565	148.132	53.9929	1.45324	0.00636718	0.0345024	BX530068.1	13	22843830	22847484	-	1257	transcribed_unprocessed_pseudogene	-	-	124	175	92	19	2.90354	3.58318	1.93785	0.424519
ENSDARG00000036791	388.59	390.585	130.054	154.852	389.588	142.453	1.45232	1.09242e-09	3.2855e-08	dnmt3bb.1	23	17011454	17101360	-	3678	protein_coding	DNA (cytosine-5-)-methyltransferase 3 beta, duplicate b.1 [Source:ZFIN;Acc:ZDB-GENE-050314-1]	DNA_methylase	363	418	135	152	2.90493	2.92503	0.971829	1.16067
ENSDARG00000008263	149.869	128.015	61.6551	39.7317	138.942	50.6934	1.45173	0.000254187	0.00235425	mfsd4ab	23	18103080	18114890	+	1966	protein_coding	major facilitator superfamily domain containing 4Ab [Source:ZFIN;Acc:ZDB-GENE-060810-38]	MFS_1	140	137	64	39	2.09597	1.7935	0.861915	0.557134
ENSDARG00000076900	108.12	85.9661	21.1939	49.9193	97.0431	35.5566	1.45094	0.00420838	0.0248162	prozb	1	144284	151998	+	1519	protein_coding	protein Z, vitamin K-dependent plasma glycoprotein b [Source:ZFIN;Acc:ZDB-GENE-120816-1]	Trypsin	101	92	22	49	1.95706	1.55882	0.383471	0.905976
ENSDARG00000025465	150.94	189.686	57.8017	67.2383	170.313	62.52	1.44777	3.56898e-05	0.000430064	spon2a	14	21861099	21901815	+	4724	protein_coding	spondin 2a, extracellular matrix protein [Source:ZFIN;Acc:ZDB-GENE-990415-160]	-	141	203	60	66	0.878517	1.10599	0.336286	0.392385
ENSDARG00000056984	67.4413	89.7038	23.1207	34.6379	78.5725	28.8793	1.44754	0.00469821	0.0271474	rad9a	14	21923741	21932403	-	1884	protein_coding	RAD9 checkpoint clamp component A [Source:ZFIN;Acc:ZDB-GENE-040426-935]	-	63	96	24	34	0.984239	1.31146	0.337286	0.506846
ENSDARG00000055338	526.684	427.962	210.976	138.552	477.323	174.764	1.44739	1.22201e-08	3.13302e-07	CAPN1	21	27482149	27507786	-	2443	protein_coding	si:dkeyp-50d11.2 [Source:ZFIN;Acc:ZDB-GENE-091113-22]	Peptidase_C2	492	458	219	136	5.92765	4.82511	2.3735	1.56349
ENSDARG00000109563	122.037	105.589	34.681	48.9006	113.813	41.7908	1.44635	0.000653146	0.00525759	CABZ01074453.1	KZ116053.1	7782	10784	+	258	protein_coding	-	-	114	113	36	48	13.0055	11.2726	3.69446	5.22516
ENSDARG00000110756	64.2298	62.6057	23.1207	23.4315	63.4178	23.2761	1.44596	0.00785368	0.0407866	CLEC3A	7	65387374	65397354	+	3364	protein_coding	C-type lectin domain family 3 member A [Source:HGNC Symbol;Acc:HGNC:2052]	Lectin_C	60	67	24	23	0.524972	0.512606	0.188896	0.192022
ENSDARG00000079071	188.407	157.916	56.8383	70.2946	173.162	63.5664	1.4459	3.06689e-05	0.000375347	jam2b	9	34996245	35010396	+	1723	protein_coding	junctional adhesion molecule 2b [Source:ZFIN;Acc:ZDB-GENE-080229-3]	V-set	176	169	59	69	3.00655	2.52445	0.90664	1.12471
ENSDARG00000113780	74.9347	69.1466	17.3405	35.6567	72.0407	26.4986	1.44582	0.00848688	0.0434159	zgc:173615	4	69078543	69242961	+	2124	protein_coding	zgc:173615 [Source:ZFIN;Acc:ZDB-GENE-080218-20]	zf-C2H2	70	74	18	35	0.970028	0.89669	0.224381	0.462798
ENSDARG00000011862	69.5822	65.409	24.084	25.4691	67.4956	24.7765	1.44576	0.00620891	0.0338338	inaa	13	28675686	28681036	+	1844	protein_coding	internexin neuronal intermediate filament protein, alpha a [Source:ZFIN;Acc:ZDB-GENE-060531-65]	Filament	65	70	25	25	1.03751	0.977018	0.358961	0.380765
ENSDARG00000092731	302.95	339.192	112.713	123.27	321.071	117.992	1.44524	2.01376e-08	4.96523e-07	mhc1uka	19	7043634	7051481	+	1387	protein_coding	major histocompatibility complex class I UKA [Source:ZFIN;Acc:ZDB-GENE-060825-152]	MHC_I	283	363	117	121	6.00552	6.7359	2.23346	2.45012
ENSDARG00000112352	141.305	179.408	56.8383	61.1257	160.356	58.982	1.44459	5.54125e-05	0.000630591	CABZ01093429.1	KN150355.1	2275	4765	-	2059	protein_coding	-	-	132	192	59	60	1.88694	2.39999	0.758689	0.818414
ENSDARG00000052450	270.836	251.357	102.116	89.6511	261.096	95.8837	1.44417	2.97985e-07	5.93181e-06	hspb2	5	57629207	57641257	-	793	protein_coding	heat shock protein, alpha-crystallin-related, b2 [Source:ZFIN;Acc:ZDB-GENE-050417-260]	-	253	269	106	88	9.39049	8.73061	3.53916	3.11665
ENSDARG00000069139	62.0888	66.3434	28.9008	18.3377	64.2161	23.6193	1.44101	0.00948904	0.0471117	grik1a	10	25402463	25570647	-	4477	protein_coding	glutamate receptor, ionotropic, kainate 1a [Source:ZFIN;Acc:ZDB-GENE-030131-6502]	ANF_receptor	58	71	30	18	0.381313	0.408166	0.17742	0.112918
ENSDARG00000102538	156.292	158.85	47.2047	69.2758	157.571	58.2403	1.43785	9.19755e-05	0.000983783	mccc1	22	36875400	36899777	+	2740	protein_coding	methylcrotonoyl-CoA carboxylase 1 (alpha) [Source:ZFIN;Acc:ZDB-GENE-050208-450]	CPSase_L_D2	146	170	49	68	1.56835	1.59685	0.473493	0.697006
ENSDARG00000044751	181.984	140.162	56.8383	62.1445	161.073	59.4914	1.43601	6.44764e-05	0.000721364	ddt	21	15709061	15711765	+	1224	protein_coding	D-dopachrome tautomerase [Source:ZFIN;Acc:ZDB-GENE-040625-160]	MIF	170	150	59	61	4.08798	3.1541	1.27626	1.39967
ENSDARG00000074086	406.788	369.094	146.431	140.589	387.941	143.51	1.43399	1.12724e-09	3.38096e-08	tecpr1b	3	61292935	61336841	-	3584	protein_coding	tectonin beta-propeller repeat containing 1b [Source:ZFIN;Acc:ZDB-GENE-100812-12]	-	380	395	152	138	3.12073	2.83658	1.12291	1.08141
ENSDARG00000056950	1742.77	1670.73	604.027	660.158	1706.75	632.093	1.4332	7.03159e-26	1.09969e-23	epyc	4	16317296	16334362	-	6645	protein_coding	epiphycan [Source:ZFIN;Acc:ZDB-GENE-041008-9]	-	1628	1788	627	648	7.21108	6.92529	2.49828	2.73879
ENSDARG00000051940	655.144	739.122	304.422	211.902	697.133	258.162	1.43237	2.37734e-11	9.08408e-10	ugt2a4	5	69926766	69948119	-	5042	protein_coding	UDP glucuronosyltransferase 2 family, polypeptide A4 [Source:ZFIN;Acc:ZDB-GENE-080721-23]	UDPGT	612	791	316	208	3.57264	4.03775	1.6594	1.15861
ENSDARG00000030367	111.332	97.1791	35.6444	41.7692	104.255	38.7068	1.42952	0.000931257	0.00710944	metrn	24	37941618	37955993	-	3210	protein_coding	meteorin, glial cell differentiation regulator [Source:ZFIN;Acc:ZDB-GENE-050102-1]	-	104	104	37	41	0.953606	0.833861	0.305186	0.358721
ENSDARG00000099124	230.157	256.964	88.6292	92.7073	243.56	90.6683	1.42644	8.12308e-07	1.48336e-05	f3a	24	31277360	31290706	+	1372	protein_coding	coagulation factor IIIa [Source:ZFIN;Acc:ZDB-GENE-071119-5]	-	215	275	92	91	4.61238	5.15874	1.77542	1.8628
ENSDARG00000004763	124.178	170.998	52.0215	58.0694	147.588	55.0455	1.42508	0.000165116	0.0016219	hhla2a.2	10	35439952	35452191	+	1765	protein_coding	HERV-H LTR-associating 2a, tandem duplicate 2 [Source:ZFIN;Acc:ZDB-GENE-091204-324]	V-set	116	183	54	57	1.93443	2.66853	0.81006	0.907003
ENSDARG00000111423	189.478	170.998	71.2887	63.1632	180.238	67.226	1.42161	1.94011e-05	0.000253907	si:ch73-27e22.1	22	8581752	8725768	-	8460	protein_coding	si:ch73-27e22.1 [Source:ZFIN;Acc:ZDB-GENE-081031-107]	-	177	183	74	62	0.615806	0.556732	0.231595	0.205826
ENSDARG00000102720	474.23	303.685	157.028	133.458	388.957	145.243	1.41897	2.95013e-07	5.8828e-06	zgc:123284	3	49097775	49100456	+	1220	protein_coding	zgc:123284 [Source:ZFIN;Acc:ZDB-GENE-051113-92]	adh_short	443	325	163	131	10.6877	6.85628	3.53749	3.01571
ENSDARG00000090834	118.825	69.1466	37.5711	32.6004	93.9859	35.0857	1.41822	0.00336834	0.020722	epor	3	14543953	14561096	+	1655	protein_coding	erythropoietin receptor [Source:ZFIN;Acc:ZDB-GENE-071116-1]	fn3	111	74	39	32	1.97408	1.1508	0.623928	0.543038
ENSDARG00000076306	814.647	794.252	310.202	292.385	804.45	301.293	1.41646	2.70307e-16	1.7989e-14	loxl3a	14	5866894	5916580	-	2529	protein_coding	lysyl oxidase-like 3a [Source:ZFIN;Acc:ZDB-GENE-070818-2]	SRCR	761	850	322	287	8.8568	8.65038	3.37113	3.18722
ENSDARG00000055455	1659.27	1421.24	653.159	501.231	1540.26	577.195	1.415	1.99712e-17	1.5506e-15	gpm6aa	14	36348549	36378494	-	5148	protein_coding	glycoprotein M6Aa [Source:ZFIN;Acc:ZDB-GENE-030710-7]	-	1550	1521	678	492	8.86205	7.60424	3.48706	2.68414
ENSDARG00000062156	86.7102	86.9005	37.5711	27.5066	86.8053	32.5388	1.41402	0.00283535	0.0180203	abi3bpa	9	30132498	30165621	-	2805	protein_coding	ABI family, member 3 (NESH) binding protein a [Source:ZFIN;Acc:ZDB-GENE-070912-325]	fn3	81	93	39	27	0.849949	0.853327	0.368129	0.270339
ENSDARG00000036096	432.48	462.535	131.98	204.771	447.508	168.376	1.41205	2.48306e-08	6.014e-07	smad3a	7	34102661	34149263	-	6173	protein_coding	SMAD family member 3a [Source:ZFIN;Acc:ZDB-GENE-000509-3]	MH2	404	495	137	201	1.92631	2.06383	0.587614	0.914488
ENSDARG00000095717	78.1462	87.8349	29.8642	32.6004	82.9906	31.2323	1.41107	0.00313338	0.0195123	si:dkey-172k15.6	4	77038392	77202737	+	5775	protein_coding	si:dkey-172k15.6 [Source:ZFIN;Acc:ZDB-GENE-121214-9]	-	73	94	31	32	0.372059	0.41893	0.142127	0.155624
ENSDARG00000035663	115.614	105.589	42.3879	40.7505	110.601	41.5692	1.41104	0.000683179	0.00545721	zgc:103438	19	42567539	42573297	-	1778	protein_coding	zgc:103438 [Source:ZFIN;Acc:ZDB-GENE-041010-131]	-	108	113	44	40	1.78786	1.63573	0.655223	0.631839
ENSDARG00000020764	155.222	228.931	57.8017	87.6135	192.077	72.7076	1.40484	0.000106062	0.00110899	slmapb	23	19590006	19604413	+	2697	protein_coding	sarcolemma associated protein b [Source:ZFIN;Acc:ZDB-GENE-040426-809]	-	145	245	60	86	1.58244	2.33803	0.589031	0.895562
ENSDARG00000008105	239.791	193.424	72.2521	91.6886	216.607	81.9703	1.40193	9.98144e-06	0.000140452	mettl2a	3	19665319	19682819	+	1475	protein_coding	methyltransferase like 2A [Source:ZFIN;Acc:ZDB-GENE-050417-462]	-	224	207	75	90	4.46989	3.61197	1.34629	1.71368
ENSDARG00000017108	74.9347	56.0648	23.1207	26.4878	65.4998	24.8042	1.39994	0.00986244	0.0485145	kcna1b	4	74551606	74556277	+	2075	protein_coding	potassium voltage-gated channel, shaker-related subfamily, member 1b [Source:ZFIN;Acc:ZDB-GENE-140515-1]	Ion_trans	70	60	24	26	0.992935	0.744215	0.306239	0.351912
ENSDARG00000031506	190.548	184.08	62.6185	79.4634	187.314	71.041	1.39973	2.18157e-05	0.000279985	flvcr2b	20	46311242	46349064	+	2580	protein_coding	feline leukemia virus subgroup C cellular receptor family, member 2b [Source:ZFIN;Acc:ZDB-GENE-041210-312]	MFS_1	178	197	65	78	2.03068	1.96522	0.667055	0.849089
ENSDARG00000036888	192.689	240.144	81.8857	82.5197	216.417	82.2027	1.39776	6.69204e-06	9.90016e-05	zgc:153935	25	27714932	27735763	-	2511	protein_coding	zgc:153935 [Source:ZFIN;Acc:ZDB-GENE-061103-148]	-	180	257	85	81	2.10992	2.63422	0.896273	0.905976
ENSDARG00000029064	614.465	969.922	269.741	333.135	792.193	301.438	1.39563	1.71396e-09	4.97049e-08	uqcrq	14	38875078	38878419	-	1117	protein_coding	ubiquinol-cytochrome c reductase, complex III subunit VII [Source:ZFIN;Acc:ZDB-GENE-040718-199]	-	574	1038	280	327	15.1251	23.9172	6.63701	8.22191
ENSDARG00000045143	2732.98	3052.73	1265.86	935.224	2892.85	1100.54	1.39398	4.27316e-20	4.34366e-18	hbbe2	12	20349865	20350629	-	590	protein_coding	hemoglobin beta embryonic-2 [Source:ZFIN;Acc:ZDB-GENE-040702-1]	-	2553	3267	1314	918	127.362	142.516	58.9673	43.6988
ENSDARG00000089475	505.274	268.177	174.368	120.214	386.725	147.291	1.39	1.32296e-05	0.000180027	hbae1	3	55120330	55121125	-	633	protein_coding	hemoglobin, alpha embryonic 1 [Source:NCBI gene;Acc:30597]	-	472	287	181	118	21.9472	11.6693	7.57082	5.23548
ENSDARG00000042850	94.2037	74.7531	28.9008	35.6567	84.4784	32.2788	1.38775	0.00384094	0.0229774	nphs2	22	17251275	17256573	-	1808	protein_coding	nephrosis 2, idiopathic, steroid-resistant (podocin) [Source:ZFIN;Acc:ZDB-GENE-051102-2]	-	88	80	30	35	1.4326	1.13882	0.43933	0.543686
ENSDARG00000036968	80.2872	78.4908	23.1207	37.6942	79.389	30.4074	1.38679	0.00586844	0.032357	si:ch1073-416d2.3	17	53292215	53295507	+	1354	protein_coding	si:ch1073-416d2.3 [Source:ZFIN;Acc:ZDB-GENE-131127-199]	Serpin	75	84	24	37	1.63036	1.59671	0.469311	0.76747
ENSDARG00000059349	1211.8	1011.97	407.502	443.161	1111.89	425.332	1.386	6.79694e-17	4.91152e-15	homer2	18	1615	2758	+	528	protein_coding	homer scaffolding protein 2 [Source:ZFIN;Acc:ZDB-GENE-050522-417]	-	1132	1083	423	435	63.1035	52.791	21.2116	23.1384
ENSDARG00000077306	300.809	283.127	114.64	109.008	291.968	111.824	1.384	1.54085e-07	3.25961e-06	cutc	13	674351	678456	+	756	protein_coding	cutC copper transporter homolog (E. coli) [Source:ZFIN;Acc:ZDB-GENE-041010-144]	-	281	303	119	107	10.9402	10.3154	4.16767	3.97503
ENSDARG00000113721	131.671	118.671	28.9008	67.2383	125.171	48.0696	1.38341	0.00235108	0.0153892	hpdl	KZ116047.1	3806	13796	+	1263	protein_coding	4-hydroxyphenylpyruvate dioxygenase-like [Source:ZFIN;Acc:ZDB-GENE-071004-50]	Glyoxalase	123	127	30	66	2.86644	2.58801	0.628906	1.46764
ENSDARG00000024160	183.055	176.604	35.6444	102.895	179.83	69.2697	1.37916	0.00153546	0.0108543	hao1	17	4030493	4063581	+	1311	protein_coding	hydroxyacid oxidase (glycolate oxidase) 1 [Source:ZFIN;Acc:ZDB-GENE-060519-2]	FMN_dh	171	189	37	101	3.83914	3.71043	0.747252	2.1637
ENSDARG00000038424	133.812	97.1791	50.0948	38.713	115.496	44.4039	1.37615	0.00117665	0.00866852	si:dkey-8k3.2	16	16665203	16701718	-	5979	protein_coding	si:dkey-8k3.2 [Source:ZFIN;Acc:ZDB-GENE-100922-98]	A2M_comp	125	104	52	38	0.61535	0.447682	0.230273	0.178498
ENSDARG00000062181	221.593	236.407	104.043	72.3321	229	88.1876	1.3754	1.01912e-05	0.000142944	bmt2	25	21770962	21782435	-	1367	protein_coding	base methyltransferase of 25S rRNA 2 homolog [Source:ZFIN;Acc:ZDB-GENE-060825-17]	-	207	253	108	71	4.457	4.7634	2.09181	1.45871
ENSDARG00000088390	115.614	86.9005	22.1573	56.0319	101.257	39.0946	1.37517	0.00679094	0.0362123	nme4	3	15068321	15082475	-	1878	protein_coding	NME/NM23 nucleoside diphosphate kinase 4 [Source:ZFIN;Acc:ZDB-GENE-040426-1043]	NDK	108	93	23	55	1.69266	1.27454	0.324265	0.822518
ENSDARG00000100159	170.209	151.375	58.765	65.2008	160.792	61.9829	1.37511	8.05932e-05	0.000874424	angptl1b	2	97692	103388	-	1869	protein_coding	angiopoietin-like 1b [Source:ZFIN;Acc:ZDB-GENE-030131-6243]	-	159	162	61	64	2.50397	2.23085	0.864149	0.961721
ENSDARG00000076448	233.368	125.211	38.5344	99.8387	179.29	69.1866	1.37445	0.00263608	0.0169806	serpinf2a	21	40092301	40104916	+	1805	protein_coding	serpin peptidase inhibitor, clade F (alpha-2 antiplasmin, pigment epithelium derived factor), member 2a [Source:ZFIN;Acc:ZDB-GENE-060822-1]	Serpin	218	134	40	98	3.55484	1.9107	0.586747	1.52485
ENSDARG00000018296	139.164	171.932	52.0215	68.2571	155.548	60.1393	1.3734	0.000174488	0.00170326	rev1	9	21793565	21816606	+	5101	protein_coding	REV1, polymerase (DNA directed) [Source:ZFIN;Acc:ZDB-GENE-081105-180]	IMS	130	184	54	67	0.750117	0.928384	0.280289	0.368891
ENSDARG00000002217	965.587	886.759	397.868	316.835	926.173	357.352	1.37284	1.51782e-14	8.18537e-13	scocb	14	48932235	48939560	-	3160	protein_coding	short coiled-coil protein b [Source:ZFIN;Acc:ZDB-GENE-041010-41]	-	902	949	413	311	8.40157	7.72938	3.46044	2.76409
ENSDARG00000091954	66.3708	67.2778	22.1573	29.5441	66.8243	25.8507	1.37175	0.00984938	0.0484721	si:dkeyp-122a9.1	22	14338178	14346575	-	913	protein_coding	si:dkeyp-122a9.1 [Source:ZFIN;Acc:ZDB-GENE-060503-651]	-	62	72	23	29	1.99876	2.02968	0.666999	0.892084
ENSDARG00000074597	113.473	142.031	70.3254	28.5253	127.752	49.4253	1.36778	0.00313178	0.0195123	lzts2a	13	18801094	18863680	-	3011	protein_coding	leucine zipper, putative tumor suppressor 2a [Source:ZFIN;Acc:ZDB-GENE-090313-276]	Fez1	106	152	73	28	1.03618	1.29927	0.641919	0.261171
ENSDARG00000004115	620.888	626.057	219.646	263.859	623.473	241.753	1.36759	3.79803e-12	1.58095e-10	mgat4b	14	16483926	16754262	-	3199	protein_coding	mannosyl (alpha-1,3-)-glycoprotein beta-1,4-N-acetylglucosaminyltransferase, isozyme B [Source:ZFIN;Acc:ZDB-GENE-040704-19]	-	580	670	228	259	5.33648	5.39046	1.88707	2.27386
ENSDARG00000105625	107.05	121.474	32.7543	56.0319	114.262	44.3931	1.367	0.00166914	0.0115945	si:cabz01007812.1	7	2145304	2175181	-	1917	protein_coding	si:cabz01007812.1 [Source:ZFIN;Acc:ZDB-GENE-160728-152]	-	100	130	34	55	1.53539	1.74537	0.469596	0.805785
ENSDARG00000017984	241.932	264.439	88.6292	107.989	253.186	98.309	1.36621	1.89567e-06	3.17079e-05	zgc:172106	1	55293424	55299173	+	2302	protein_coding	zgc:172106 [Source:ZFIN;Acc:ZDB-GENE-080204-42]	ig	226	283	92	106	2.88964	3.16407	1.05816	1.29324
ENSDARG00000006456	699.034	749.4	308.276	253.672	724.217	280.974	1.36552	5.01636e-13	2.33192e-11	pdgfrl	14	30359124	30366196	-	1402	protein_coding	platelet-derived growth factor receptor-like [Source:ZFIN;Acc:ZDB-GENE-040426-901]	-	653	802	320	249	13.709	14.7228	6.04324	4.98804
ENSDARG00000093874	92.0627	142.031	48.1681	42.788	117.047	45.478	1.3655	0.00137345	0.00986734	si:dkey-196j8.2	13	5570952	5574014	+	2137	protein_coding	si:dkey-196j8.2 [Source:ZFIN;Acc:ZDB-GENE-081107-58]	-	86	152	50	42	1.1845	1.83065	0.619489	0.55198
ENSDARG00000035944	731.149	806.399	294.789	302.572	768.774	298.68	1.36451	1.46959e-14	7.96454e-13	sync	19	30990129	30997794	+	4309	protein_coding	syncoilin, intermediate filament protein [Source:ZFIN;Acc:ZDB-GENE-060503-747]	-	683	863	306	297	4.66536	5.15465	1.88024	1.93579
ENSDARG00000041599	264.413	189.686	67.4353	109.008	227.049	88.2214	1.36425	6.36199e-05	0.000712875	zgc:91860	18	17428258	17461796	+	3234	protein_coding	zgc:91860 [Source:ZFIN;Acc:ZDB-GENE-040704-34]	-	247	203	70	107	2.24801	1.61555	0.573094	0.929228
ENSDARG00000034559	290.104	276.587	98.2628	122.251	283.346	110.257	1.36246	6.20865e-07	1.15791e-05	srpx2	14	35442511	35462148	-	1942	protein_coding	sushi-repeat containing protein, X-linked 2 [Source:ZFIN;Acc:ZDB-GENE-110411-231]	Sushi	271	296	102	120	4.10734	3.9229	1.39065	1.73544
ENSDARG00000033443	254.778	259.767	114.64	85.576	257.273	100.108	1.36051	2.6894e-06	4.36504e-05	mdm2	4	23125689	23136195	+	3894	protein_coding	MDM2 oncogene, E3 ubiquitin protein ligase [Source:ZFIN;Acc:ZDB-GENE-990415-153]	-	238	278	119	84	1.79896	1.83744	0.809131	0.605845
ENSDARG00000112087	736.501	632.598	259.144	275.066	684.55	267.105	1.35732	9.40099e-13	4.18363e-11	ube2l3a	10	3133098	3138859	-	1620	protein_coding	ubiquitin-conjugating enzyme E2L 3a [Source:ZFIN;Acc:ZDB-GENE-030131-2977]	UQ_con	688	677	269	270	12.5001	10.7557	4.39648	4.68088
ENSDARG00000067714	110.261	99.9823	43.3513	38.713	105.122	41.0321	1.35607	0.00138151	0.00992069	hspb3	5	40296551	40297003	-	453	protein_coding	heat shock protein, alpha-crystallin-related, b3 [Source:ZFIN;Acc:ZDB-GENE-070705-338]	-	103	107	45	38	6.69237	6.07926	2.63016	2.35594
ENSDARG00000053136	710.809	793.318	341.03	246.54	752.063	293.785	1.35543	2.58937e-11	9.83985e-10	b2m	4	12785964	12795489	-	2348	protein_coding	beta-2-microglobulin [Source:ZFIN;Acc:ZDB-GENE-980526-88]	Pkinase	664	849	354	242	8.32359	9.30625	3.99184	2.89465
ENSDARG00000092950	72.7937	137.359	38.5344	43.8068	105.076	41.1706	1.3552	0.00390294	0.0233165	BX294379.1	1	46725808	46743552	-	876	processed_transcript	-	-	68	147	40	43	2.28479	4.31895	1.20899	1.37861
ENSDARG00000054537	495.64	438.24	189.782	175.227	466.94	182.505	1.35434	5.56882e-10	1.76198e-08	nhsl1a	17	30522764	30591223	+	8652	protein_coding	NHS-like 1a [Source:ZFIN;Acc:ZDB-GENE-050411-25]	-	463	469	197	172	1.57509	1.39515	0.602862	0.558329
ENSDARG00000034423	2148.49	2334.17	1017.31	735.546	2241.33	876.428	1.35421	1.85552e-17	1.45615e-15	sncga	13	22659153	22673166	+	1298	protein_coding	synuclein, gamma a [Source:ZFIN;Acc:ZDB-GENE-050417-18]	-	2007	2498	1056	722	45.5107	49.5317	21.5406	15.6222
ENSDARG00000092402	86.7102	99.0479	26.0108	46.8631	92.879	36.4369	1.3533	0.00470126	0.0271522	BX569787.1	18	23877624	23889042	+	5146	antisense	-	-	81	106	27	46	0.463293	0.530153	0.138919	0.251054
ENSDARG00000104083	234.439	214.915	73.2154	102.895	224.677	88.0552	1.35246	1.44416e-05	0.000194824	adgre5b.2	1	58580412	58592866	-	2301	protein_coding	adhesion G protein-coupled receptor E5b, duplicate 2 [Source:ZFIN;Acc:ZDB-GENE-121214-277]	7tm_2	219	230	76	101	2.80136	2.57263	0.87451	1.23277
ENSDARG00000035692	2664.46	2235.12	1042.36	876.135	2449.79	959.246	1.35197	4.4375e-21	4.95709e-19	rps3a	1	24355515	24359653	+	1874	protein_coding	ribosomal protein S3A [Source:ZFIN;Acc:ZDB-GENE-030131-9184]	-	2489	2392	1082	860	39.0927	32.8516	15.2871	12.8886
ENSDARG00000022165	507.415	323.307	120.42	205.79	415.361	163.105	1.34872	8.79495e-06	0.00012586	mgst1.2	4	12718965	12725513	-	2150	protein_coding	microsomal glutathione S-transferase 1.2 [Source:ZFIN;Acc:ZDB-GENE-040704-59]	-	474	346	125	202	6.48904	4.14193	1.53936	2.63871
ENSDARG00000096639	200.183	133.621	57.8017	73.3509	166.902	65.5763	1.34686	0.000267538	0.00245711	BX276101.1	20	19543262	19545552	-	830	processed_transcript	-	-	187	143	60	72	6.63139	4.43428	1.914	2.43631
ENSDARG00000034941	180.914	226.128	63.5818	96.7824	203.521	80.1821	1.34662	7.04374e-05	0.000780875	si:dkey-224e22.2	18	44746594	44765515	+	1845	protein_coding	si:dkey-224e22.2 [Source:ZFIN;Acc:ZDB-GENE-061207-59]	-	169	242	66	95	2.69607	3.37586	0.947143	1.44612
ENSDARG00000086327	142.376	117.736	41.4245	61.1257	130.056	51.2751	1.34361	0.000806009	0.00629371	srrm4	5	15667874	15817204	+	12640	protein_coding	serine/arginine repetitive matrix 4 [Source:ZFIN;Acc:ZDB-GENE-050208-34]	-	133	126	43	60	0.309703	0.25656	0.0900719	0.133316
ENSDARG00000069878	670.131	733.515	271.668	283.216	701.823	277.442	1.33952	2.45569e-13	1.17653e-11	snu13a	3	58158595	58165254	-	1706	protein_coding	SNU13 homolog, small nuclear ribonucleoprotein a (U4/U6.U5) [Source:ZFIN;Acc:ZDB-GENE-040426-879]	-	626	785	282	278	10.8003	11.8428	4.37661	4.57661
ENSDARG00000069093	6166.06	6126.95	2624.2	2240.26	6146.51	2432.23	1.33727	7.39672e-33	1.76034e-30	col2a1a	8	21195420	21219473	+	5937	protein_coding	collagen, type II, alpha 1a [Source:ZFIN;Acc:ZDB-GENE-980526-192]	VWC	5760	6557	2724	2199	28.5559	28.4252	12.1481	10.4025
ENSDARG00000012942	443.185	456.929	157.991	198.659	450.057	178.325	1.33672	3.57895e-09	9.8816e-08	itgb5	9	22677503	22748015	+	3619	protein_coding	integrin, beta 5 [Source:ZFIN;Acc:ZDB-GENE-030131-6022]	-	414	489	164	195	3.36707	3.47765	1.19984	1.5133
ENSDARG00000045835	942.037	823.219	328.506	370.829	882.628	349.668	1.33572	2.20418e-14	1.17422e-12	si:dkey-14d8.6	4	5531583	5533803	+	682	protein_coding	si:dkey-14d8.6 [Source:ZFIN;Acc:ZDB-GENE-041210-124]	-	880	881	341	364	37.9786	33.2473	13.2385	14.9898
ENSDARG00000005085	285.822	385.913	151.248	115.12	335.868	133.184	1.33469	1.30174e-06	2.2783e-05	ggctb	16	53685812	53709101	+	2050	protein_coding	gamma-glutamylcyclotransferase b [Source:ZFIN;Acc:ZDB-GENE-040426-1939]	-	267	413	157	113	3.83352	5.18515	2.02775	1.54811
ENSDARG00000039958	204.465	179.408	102.116	49.9193	191.936	76.0178	1.3332	0.000402604	0.00346094	utp11l	16	33645721	33650578	-	1095	protein_coding	UTP11-like, U3 small nucleolar ribonucleoprotein (yeast) [Source:ZFIN;Acc:ZDB-GENE-030131-8093]	-	191	192	106	49	5.13405	4.51287	2.56307	1.25678
ENSDARG00000003616	572.715	598.959	269.741	195.602	585.837	232.672	1.33123	6.98075e-10	2.16627e-08	arih1	18	18879733	18901017	+	2456	protein_coding	ariadne ubiquitin-conjugating enzyme E2 binding protein homolog 1 (Drosophila) [Source:ZFIN;Acc:ZDB-GENE-030131-5213]	IBR	535	641	280	192	6.4116	6.7173	3.01854	2.19559
ENSDARG00000089961	118.825	183.145	51.0581	69.2758	150.985	60.167	1.33067	0.00065447	0.00526574	si:cabz01007807.1	7	2120630	2143313	-	1861	protein_coding	si:cabz01007807.1 [Source:ZFIN;Acc:ZDB-GENE-160728-149]	-	111	196	53	68	1.75557	2.71066	0.754045	1.02622
ENSDARG00000035891	653.003	653.155	241.804	278.122	653.079	259.963	1.32954	2.35288e-12	9.98376e-11	acana	7	48761646	48787379	+	6229	protein_coding	aggrecan a [Source:ZFIN;Acc:ZDB-GENE-050208-221]	Xlink	610	699	251	273	2.88239	2.88818	1.0669	1.2309
ENSDARG00000074546	889.582	783.973	258.181	410.561	836.778	334.371	1.3242	1.52017e-09	4.46168e-08	BX248395.1	22	9060699	9096248	+	5993	protein_coding	-	NACHT	831	839	268	403	4.08129	3.60316	1.18402	1.8886
ENSDARG00000034001	289.034	219.587	70.3254	133.458	254.311	101.892	1.32062	0.000114758	0.00118186	tango6	18	17032312	17075098	-	9123	protein_coding	transport and golgi organization 6 homolog (Drosophila) [Source:ZFIN;Acc:ZDB-GENE-050419-237]	-	270	235	73	131	0.871098	0.662972	0.211862	0.403285
ENSDARG00000071076	297.598	247.62	58.765	159.946	272.609	109.355	1.31961	0.000624029	0.0050548	ldhbb	25	3326885	3336587	+	1781	protein_coding	lactate dehydrogenase Bb [Source:ZFIN;Acc:ZDB-GENE-040718-176]	-	278	265	61	157	4.59432	3.82955	0.906847	2.47579
ENSDARG00000022614	104.909	128.949	53.9482	39.7317	116.929	46.84	1.31949	0.00143421	0.0102387	ddx43	13	27332656	27354033	-	2518	protein_coding	DEAD (Asp-Glu-Ala-Asp) box polypeptide 43 [Source:ZFIN;Acc:ZDB-GENE-080204-77]	DEAD	98	138	56	39	1.14554	1.41055	0.588844	0.434998
ENSDARG00000014113	115.614	165.391	79.959	32.6004	140.502	56.2797	1.31837	0.00376206	0.0225854	wasla	25	27744293	27812810	+	2934	protein_coding	Wiskott-Aldrich syndrome-like a [Source:ZFIN;Acc:ZDB-GENE-070209-220]	PBD	108	177	83	32	1.08344	1.55267	0.749007	0.306315
ENSDARG00000030650	108.12	116.802	42.3879	47.8818	112.461	45.1349	1.31819	0.00124622	0.00909478	r3hdml	23	25821055	25827370	+	1294	protein_coding	R3H domain containing-like [Source:ZFIN;Acc:ZDB-GENE-090313-275]	SCP	101	125	44	47	2.29735	2.48623	0.900298	1.0201
ENSDARG00000060094	94.2037	142.965	42.3879	52.9756	118.585	47.6818	1.31753	0.00187113	0.0127508	ptgis	6	46568119	46589726	-	2019	protein_coding	prostaglandin I2 (prostacyclin) synthase [Source:ZFIN;Acc:ZDB-GENE-070116-1]	p450	88	153	44	52	1.28288	1.95039	0.577011	0.723345
ENSDARG00000079199	556.658	449.453	186.892	218.015	503.056	202.454	1.3128	3.51659e-09	9.73399e-08	megf6a	23	21119592	21215520	-	5219	protein_coding	multiple EGF-like-domains 6a [Source:ZFIN;Acc:ZDB-GENE-090312-12]	EGF_CA	520	481	194	214	2.93263	2.37205	0.984198	1.15161
ENSDARG00000036878	99.5561	103.72	49.1314	32.6004	101.638	40.8659	1.31274	0.002974	0.0187383	sh3bgrl2	23	31405497	31423729	+	2144	protein_coding	SH3 domain binding glutamate-rich protein like 2 [Source:ZFIN;Acc:ZDB-GENE-040704-38]	-	93	111	51	32	1.27673	1.33249	0.629815	0.419183
ENSDARG00000008904	600.548	539.157	235.06	224.128	569.853	229.594	1.31078	4.49279e-11	1.64773e-09	smarca2	5	45138934	45284136	+	6267	protein_coding	SWI/SNF related, matrix associated, actin dependent regulator of chromatin, subfamily a, member 2 [Source:ZFIN;Acc:ZDB-GENE-030131-5964]	SNF2_N	561	577	244	220	2.63478	2.36963	1.03086	0.985919
ENSDARG00000104613	2054.28	1949.19	762.982	851.685	2001.73	807.334	1.31017	2.01355e-23	2.75542e-21	znf1179	22	1796057	1800444	+	1427	protein_coding	zinc finger protein 1179 [Source:ZFIN;Acc:ZDB-GENE-050208-622]	zf-C2H2	1919	2086	792	836	39.5815	37.6232	14.695	16.4536
ENSDARG00000038107	7867.08	8473.27	3244.6	3368.03	8170.17	3306.31	1.30529	1.42238e-39	5.36948e-37	sgcg	15	9327252	9353696	+	7938	protein_coding	sarcoglycan, gamma [Source:ZFIN;Acc:ZDB-GENE-030724-2]	-	7349	9068	3368	3306	27.2495	29.4012	11.2339	11.6969
ENSDARG00000017986	339.347	594.287	151.248	227.184	466.817	189.216	1.30523	9.68847e-06	0.000137123	vps13d	23	21696560	21763598	-	13611	protein_coding	vacuolar protein sorting 13 homolog D (S. cerevisiae) [Source:ZFIN;Acc:ZDB-GENE-050912-1]	UBA	317	636	157	223	0.685504	1.20263	0.305406	0.460143
ENSDARG00000020031	1153.99	1033.46	469.157	415.655	1093.73	442.406	1.30497	5.01809e-16	3.22203e-14	cldn11a	2	25997426	26001173	-	1316	protein_coding	claudin 11a [Source:ZFIN;Acc:ZDB-GENE-040718-369]	-	1078	1106	487	408	24.1104	21.6304	9.79808	8.70728
ENSDARG00000039501	118.825	110.261	50.0948	42.788	114.543	46.4414	1.30117	0.00131578	0.00952995	ugt2a6	5	69856153	69865574	+	1899	protein_coding	UDP glucuronosyltransferase 2 family, polypeptide A6 [Source:ZFIN;Acc:ZDB-GENE-081104-3]	UDPGT	111	118	52	42	1.72044	1.59927	0.725014	0.621159
ENSDARG00000043997	76.0052	86.9005	37.5711	28.5253	81.4529	33.0482	1.3008	0.00691575	0.0367159	cyp2x8	25	17386763	17395315	-	1575	protein_coding	cytochrome P450, family 2, subfamily X, polypeptide 8 [Source:ZFIN;Acc:ZDB-GENE-040704-28]	p450	71	93	39	28	1.32684	1.51973	0.65562	0.499293
ENSDARG00000076213	78.1462	72.8843	32.7543	28.5253	75.5153	30.6398	1.30022	0.0083211	0.0426951	DOCK4 (1 of many)	25	21517551	21716326	-	7653	protein_coding	si:dkey-81e3.1 [Source:ZFIN;Acc:ZDB-GENE-120703-34]	Ded_cyto	73	78	34	28	0.280758	0.262318	0.117629	0.102755
ENSDARG00000015278	374.674	350.405	160.881	133.458	362.539	147.17	1.29949	9.44141e-08	2.07134e-06	plxnc1	4	18281954	18315912	-	5096	protein_coding	plexin C1 [Source:ZFIN;Acc:ZDB-GENE-030131-1620]	TIG	350	375	167	131	2.02153	1.89394	0.867671	0.721972
ENSDARG00000090368	85.6397	100.917	47.2047	28.5253	93.2782	37.865	1.29926	0.00558061	0.0310672	dre-mir-132-2	10	35645017	35645135	+	119	miRNA	dre-mir-132-2 [Source:miRBase;Acc:MI0001991]	-	80	108	49	28	19.7872	23.3583	10.9023	6.60829
ENSDARG00000018270	218.381	224.259	75.1422	104.932	221.32	90.0373	1.29916	2.83649e-05	0.000349888	olfm1a	5	64732036	64775757	+	2300	protein_coding	olfactomedin 1a [Source:ZFIN;Acc:ZDB-GENE-040718-194]	-	204	240	78	103	2.61062	2.68565	0.897914	1.25773
ENSDARG00000100886	123.107	148.572	84.7758	25.4691	135.839	55.1224	1.29862	0.00851766	0.0435429	si:dkeyp-97a10.1	16	50953547	50968750	+	893	protein_coding	si:dkeyp-97a10.1 [Source:ZFIN;Acc:ZDB-GENE-131121-449]	V-set	115	159	88	25	3.79042	4.58259	2.60915	0.786261
ENSDARG00000096566	69.5822	158.85	45.278	47.8818	114.216	46.5799	1.29743	0.00659846	0.0354797	zgc:165656	1	51615506	51627129	+	809	protein_coding	zgc:165656 [Source:ZFIN;Acc:ZDB-GENE-070928-6]	-	65	170	47	47	2.36486	5.40836	1.53822	1.63165
ENSDARG00000089032	179.843	194.358	79.959	72.3321	187.101	76.1455	1.29694	5.30907e-05	0.000607961	si:ch211-154o6.2	16	21673723	21692024	-	1311	protein_coding	si:ch211-154o6.2 [Source:ZFIN;Acc:ZDB-GENE-030131-2855]	-	168	208	83	71	3.77179	4.08344	1.67627	1.52102
ENSDARG00000081252	108.12	113.999	60.6918	29.5441	111.059	45.1179	1.29693	0.00437967	0.0256726	dre-mir-16b	1	46722379	46722518	-	140	miRNA	dre-mir-16b [Source:miRBase;Acc:MI0001895]	-	101	122	63	29	21.2341	22.4283	11.9146	5.81766
ENSDARG00000079543	382.167	245.751	88.6292	167.077	313.959	127.853	1.29648	0.00011822	0.00121238	dpys	16	44298902	44325688	+	2772	protein_coding	dihydropyrimidinase [Source:ZFIN;Acc:ZDB-GENE-070508-1]	Amidohydro_1	357	263	92	164	3.79067	2.4419	0.878744	1.66161
ENSDARG00000104678	144.517	73.8187	52.0215	36.6754	109.168	44.3485	1.29535	0.00625617	0.0340236	CU467646.6	4	77092909	77108450	+	8189	protein_coding	-	zf-C2H2	135	79	54	36	0.485226	0.248291	0.174595	0.123467
ENSDARG00000036295	453.89	372.831	166.661	170.133	413.361	168.397	1.29466	2.62752e-08	6.35685e-07	golga7ba	1	54908895	54931913	+	3784	protein_coding	golgin A7 family, member Ba [Source:ZFIN;Acc:ZDB-GENE-050417-14]	-	424	399	173	167	3.29804	2.71386	1.21049	1.23949
ENSDARG00000087732	1718.15	1143.72	496.131	672.383	1430.93	584.257	1.29208	3.35722e-10	1.09547e-08	RF00017	3	30248739	30249036	+	298	misc_RNA	-	-	1605	1224	515	660	158.526	105.713	45.7571	62.2022
ENSDARG00000069122	295.457	234.538	118.493	97.8012	264.997	108.147	1.291	7.11285e-06	0.000104451	si:ch211-216l23.2	18	17754510	17775588	+	2891	protein_coding	si:ch211-216l23.2 [Source:ZFIN;Acc:ZDB-GENE-030131-3806]	-	276	251	123	96	2.80997	2.23455	1.12648	0.932613
ENSDARG00000031138	97.4151	62.6057	32.7543	32.6004	80.0104	32.6773	1.28945	0.00967591	0.0478595	irx3b	25	36488164	36492779	-	1216	protein_coding	iroquois homeobox 3b [Source:ZFIN;Acc:ZDB-GENE-030131-525]	Coprinus_mating	91	67	34	32	2.20267	1.4181	0.740309	0.739086
ENSDARG00000062381	118.825	182.211	48.1681	75.3884	150.518	61.7782	1.28843	0.00125417	0.00914419	si:ch211-238n5.4	18	20541316	20560059	-	3829	protein_coding	si:ch211-238n5.4 [Source:ZFIN;Acc:ZDB-GENE-050419-80]	-	111	195	50	74	0.853254	1.31073	0.345742	0.542781
ENSDARG00000093804	154.151	121.474	57.8017	55.0131	137.813	56.4074	1.28717	0.000621073	0.00503272	sst6	23	29375676	29376859	-	701	protein_coding	somatostatin 6 [Source:ZFIN;Acc:ZDB-GENE-081022-199]	-	144	130	60	54	6.04624	4.77299	2.26622	2.16349
ENSDARG00000039989	149.869	149.506	62.6185	60.107	149.688	61.3627	1.2863	0.000271735	0.00248939	snrnp48	16	36974523	36979597	-	1528	protein_coding	small nuclear ribonucleoprotein 48 (U11/U12) [Source:ZFIN;Acc:ZDB-GENE-030131-4482]	-	140	160	65	59	2.69678	2.69502	1.12631	1.08444
ENSDARG00000056477	359.687	454.125	158.955	176.246	406.906	167.6	1.28118	8.43695e-08	1.86971e-06	ccdc125	5	26171564	26187097	-	1494	protein_coding	coiled-coil domain containing 125 [Source:ZFIN;Acc:ZDB-GENE-060526-104]	-	336	486	165	173	6.61957	8.37242	2.92416	3.25217
ENSDARG00000001656	87.7807	77.5564	41.4245	26.4878	82.6685	33.9562	1.28086	0.00858648	0.0437618	psmb13a	19	7111779	7144585	-	1486	protein_coding	proteasome subunit beta 13a [Source:ZFIN;Acc:ZDB-GENE-001208-2]	ABC_tran	82	83	43	26	1.62419	1.43756	0.766157	0.491397
ENSDARG00000092970	1219.3	978.332	452.78	451.312	1098.81	452.046	1.28064	2.94338e-14	1.5407e-12	tmsb2	14	34486629	34488993	+	1321	protein_coding	thymosin beta 2 [Source:ZFIN;Acc:ZDB-GENE-070126-5]	-	1139	1047	470	443	25.3783	20.399	9.42026	9.41845
ENSDARG00000099412	1636.79	1478.24	627.148	656.083	1557.52	641.615	1.27925	6.2696e-20	6.15574e-18	bcan	16	29310145	29334672	-	5529	protein_coding	brevican [Source:ZFIN;Acc:ZDB-GENE-030131-6045]	Xlink	1529	1582	651	644	8.13957	7.36419	3.11747	3.27128
ENSDARG00000089697	217.311	254.161	110.787	83.5385	235.736	97.1625	1.27826	2.2739e-05	0.000290473	nfe2l2b	6	10888798	10902916	-	3002	protein_coding	nuclear factor, erythroid 2-like 2b [Source:ZFIN;Acc:ZDB-GENE-120320-3]	bZIP_Maf	203	272	115	82	1.99033	2.33197	1.01427	0.767152
ENSDARG00000001760	803.943	816.678	309.239	359.623	810.31	334.431	1.27741	3.13905e-13	1.49088e-11	tnxba	16	16621242	16649764	-	6359	protein_coding	tenascin XBa [Source:ZFIN;Acc:ZDB-GENE-070103-5]	Fibrinogen_C	751	874	321	353	3.4761	3.53743	1.33655	1.55907
ENSDARG00000015902	262.272	357.881	135.834	120.214	310.076	128.024	1.27715	3.34087e-06	5.32376e-05	stat6	23	27078866	27123180	-	3661	protein_coding	signal transducer and activator of transcription 6, interleukin-4 induced [Source:ZFIN;Acc:ZDB-GENE-030131-9359]	STAT_bind	245	383	141	118	1.96973	2.69255	1.01973	0.905234
ENSDARG00000026484	119.896	120.539	42.3879	57.0507	120.217	49.7193	1.27523	0.00144796	0.0103126	rab15	20	28782903	28800999	-	1958	protein_coding	RAB15, member RAS oncogene family [Source:ZFIN;Acc:ZDB-GENE-040718-2]	Ras	112	129	44	56	1.68363	1.69567	0.594988	0.803255
ENSDARG00000099532	700.104	778.367	314.056	297.479	739.236	305.767	1.27387	1.29257e-12	5.66015e-11	ubl3a	10	36363318	36406562	-	2670	protein_coding	ubiquitin-like 3a [Source:ZFIN;Acc:ZDB-GENE-030131-3431]	-	654	833	326	292	7.20954	8.02969	3.23277	3.0715
ENSDARG00000094889	474.23	450.388	185.929	196.621	462.309	191.275	1.27319	2.3785e-09	6.72832e-08	cplx4c	2	55890673	56003799	-	4451	protein_coding	complexin 4c [Source:ZFIN;Acc:ZDB-GENE-101018-1]	-	443	482	193	193	2.92946	2.78711	1.14807	1.21781
ENSDARG00000008723	280.47	325.176	108.86	142.627	302.823	125.743	1.26985	2.85264e-06	4.60949e-05	prkcba	1	9004719	9064912	+	3024	protein_coding	protein kinase C, beta a [Source:ZFIN;Acc:ZDB-GENE-040426-1354]	Pkinase	262	348	113	140	2.55012	2.96185	0.989383	1.30024
ENSDARG00000074316	173.42	225.194	73.2154	92.7073	199.307	82.9614	1.26684	0.000108507	0.00113132	itga1	10	8730988	8841038	+	3755	protein_coding	integrin, alpha 1 [Source:ZFIN;Acc:ZDB-GENE-091118-115]	VWA	162	241	76	91	1.26983	1.65186	0.535885	0.680628
ENSDARG00000113599	14050.3	9708.56	5053.79	4826.89	11879.4	4940.34	1.26561	5.24465e-18	4.36622e-16	hbbe1.1	3	55114097	55114874	+	684	protein_coding	hemoglobin beta embryonic-1.1 [Source:ZFIN;Acc:ZDB-GENE-030616-7]	-	13125	10390	5246	4738	564.786	390.953	203.067	194.544
ENSDARG00000005485	411.07	383.11	175.332	154.852	397.09	165.092	1.26528	3.89192e-08	9.1529e-07	ucmab	25	7982979	7988936	+	1422	protein_coding	upper zone of growth plate and cartilage matrix associated b [Source:ZFIN;Acc:ZDB-GENE-040426-2368]	-	384	410	182	152	7.94827	7.42078	3.38875	3.00208
ENSDARG00000106560	429.269	361.618	162.808	166.058	395.444	164.433	1.26519	6.26039e-08	1.4219e-06	BX640462.2	24	23729908	23758003	-	2608	protein_coding	Danio rerio minichromosome maintenance domain containing 2 (mcmdc2), mRNA. [Source:RefSeq mRNA;Acc:NM_001324440]	-	401	387	169	163	4.52561	3.81917	1.71572	1.75533
ENSDARG00000033655	3562.61	3034.98	1377.61	1370.23	3298.79	1373.92	1.26329	1.30278e-24	1.85223e-22	stmn1b	16	34523515	34527206	+	1687	protein_coding	stathmin 1b [Source:ZFIN;Acc:ZDB-GENE-050417-397]	-	3328	3248	1430	1345	58.0643	49.5526	22.4434	22.3916
ENSDARG00000034165	104.909	147.637	44.3146	61.1257	126.273	52.7202	1.26329	0.00197583	0.0133439	lingo1a	25	7229046	7230905	+	1860	protein_coding	leucine rich repeat and Ig domain containing 1a [Source:ZFIN;Acc:ZDB-GENE-080327-16]	I-set	98	158	46	60	1.55079	2.1863	0.654806	0.905976
ENSDARG00000090035	131.671	132.687	71.2887	38.713	132.179	55.0008	1.26253	0.00216873	0.0144417	rtn4r	5	10765611	10946379	-	3275	protein_coding	reticulon 4 receptor [Source:ZFIN;Acc:ZDB-GENE-040310-1]	-	123	142	74	38	1.10544	1.11594	0.598258	0.325875
ENSDARG00000037706	330.783	600.828	156.065	233.297	465.806	194.681	1.261	2.5544e-05	0.000320324	gss	23	14743087	14769523	-	2055	protein_coding	glutathione synthetase [Source:ZFIN;Acc:ZDB-GENE-041010-208]	-	309	643	162	229	4.42576	8.05312	2.08723	3.12969
ENSDARG00000041062	138.094	133.621	44.3146	69.2758	135.858	56.7952	1.26006	0.00124396	0.0090849	calb2a	18	21198762	21218851	-	1365	protein_coding	calbindin 2a [Source:ZFIN;Acc:ZDB-GENE-040426-1677]	-	129	143	46	68	2.78162	2.6963	0.892263	1.39912
ENSDARG00000088298	220.522	252.292	85.7391	112.064	236.407	98.9015	1.25908	2.46378e-05	0.00031074	si:ch211-235i11.4	17	50424407	50430817	-	2924	protein_coding	si:ch211-235i11.4 [Source:ZFIN;Acc:ZDB-GENE-131126-23]	zf-C2H2	206	270	89	110	2.07363	2.37658	0.805899	1.05656
ENSDARG00000100052	902.428	958.709	356.444	421.767	930.569	389.106	1.25879	1.15128e-13	5.69014e-12	CABZ01101977.1	KN150698.1	2793	8412	+	620	protein_coding	-	Gastrin	843	1026	370	414	40.02	42.5913	15.8008	18.7537
ENSDARG00000011166	2346.53	2173.45	1038.5	852.704	2259.99	945.604	1.25638	1.19245e-19	1.16039e-17	cahz	2	29477383	29485408	-	1919	protein_coding	carbonic anhydrase [Source:ZFIN;Acc:ZDB-GENE-980526-39]	-	2192	2326	1078	837	33.6207	31.1961	14.8735	12.2498
ENSDARG00000005853	166.997	150.441	62.6185	70.2946	158.719	66.4565	1.25595	0.000279294	0.00254671	slc25a6	9	34866576	34871900	-	1238	protein_coding	solute carrier family 25 (mitochondrial carrier; adenine nucleotide translocator), member 6 [Source:ZFIN;Acc:ZDB-GENE-070912-446]	Mito_carr	156	161	65	69	3.7089	3.34711	1.39015	1.56533
ENSDARG00000041450	3613.99	3549.84	1544.27	1463.96	3581.92	1504.11	1.25165	3.32278e-30	6.86343e-28	rab11a	18	19131773	19139152	+	3232	protein_coding	RAB11a, member RAS oncogene family [Source:ZFIN;Acc:ZDB-GENE-041114-53]	Ras	3376	3799	1603	1437	30.7448	30.2526	13.132	12.4872
ENSDARG00000018559	345.77	356.946	182.075	113.083	351.358	147.579	1.24994	5.64339e-06	8.51565e-05	kdm7ab	25	17244532	17310301	+	5063	protein_coding	lysine (K)-specific demethylase 7Ab [Source:ZFIN;Acc:ZDB-GENE-050309-32]	JmjC	323	382	189	111	1.87774	1.94187	0.988375	0.615734
ENSDARG00000087529	925.979	940.021	385.344	400.373	933	392.859	1.24808	7.01549e-15	3.97938e-13	zgc:85936	19	48060464	48069778	+	3286	protein_coding	zgc:85936 [Source:ZFIN;Acc:ZDB-GENE-040426-2450]	-	865	1006	400	393	7.748	7.87945	3.223	3.35895
ENSDARG00000098129	256.919	266.308	157.028	63.1632	261.614	110.096	1.24653	0.000747275	0.00590671	si:dkeyp-97a10.2	16	50969248	50980728	+	1856	protein_coding	si:dkeyp-97a10.2 [Source:ZFIN;Acc:ZDB-GENE-090429-4]	V-set	240	285	163	62	3.80605	3.95214	2.32529	0.938193
ENSDARG00000077263	285.822	204.637	130.054	76.4072	245.23	103.23	1.24521	0.000206526	0.00196689	si:ch73-27e22.3	22	8506168	8509215	-	1439	protein_coding	si:ch73-27e22.3 [Source:ZFIN;Acc:ZDB-GENE-070705-231]	-	267	219	135	75	5.46124	3.91696	2.48394	1.46379
ENSDARG00000095184	435.692	450.388	193.636	180.321	443.04	186.978	1.24442	8.90214e-09	2.32315e-07	si:ch73-52p7.1	13	1345276	1349922	-	884	protein_coding	si:ch73-52p7.1 [Source:ZFIN;Acc:ZDB-GENE-081107-46]	-	407	482	201	177	13.5514	14.0333	6.02021	5.6234
ENSDARG00000044550	143.446	121.474	53.9482	58.0694	132.46	56.0088	1.24122	0.000986239	0.00746153	hif1al2	21	27327442	27338639	-	2522	protein_coding	hypoxia-inducible factor 1, alpha subunit, like 2 [Source:ZFIN;Acc:ZDB-GENE-050211-2]	PAS	134	130	56	57	1.56387	1.32667	0.58791	0.634758
ENSDARG00000101535	16011.4	12695.9	5588.46	6561.85	14353.6	6075.15	1.24039	2.77354e-22	3.4701e-20	col10a1b	20	484256	487783	-	2356	protein_coding	collagen, type X, alpha 1b [Source:ZFIN;Acc:ZDB-GENE-030131-7079]	Collagen	14957	13587	5801	6441	186.857	148.427	65.1922	76.7815
ENSDARG00000070539	236.58	202.768	76.1055	110.026	219.674	93.0659	1.2398	9.04582e-05	0.000969923	arf3a	23	27622020	27633730	-	1472	protein_coding	ADP-ribosylation factor 3a [Source:ZFIN;Acc:ZDB-GENE-040801-176]	Arf	221	217	79	108	4.41901	3.79417	1.42098	2.0606
ENSDARG00000007720	670.131	413.945	205.196	253.672	542.038	229.434	1.23946	1.2986e-06	2.27482e-05	sub1b	5	41143563	41153469	+	3010	protein_coding	SUB1 homolog, transcriptional regulator b [Source:ZFIN;Acc:ZDB-GENE-040718-209]	-	626	443	213	249	6.12137	3.78793	1.87362	2.32333
ENSDARG00000028900	109.191	152.31	53.9482	57.0507	130.75	55.4994	1.23834	0.00151091	0.0106956	odf2a	21	13127742	13148318	+	5123	protein_coding	outer dense fiber of sperm tails 2a [Source:ZFIN;Acc:ZDB-GENE-091117-46]	-	102	163	56	56	0.586026	0.818896	0.289422	0.307003
ENSDARG00000097192	134.883	129.884	48.1681	64.182	132.383	56.175	1.23786	0.00116762	0.00861933	CU861453.1	16	46397661	46430863	-	5181	antisense	-	-	126	139	50	63	0.71581	0.690504	0.25552	0.341511
ENSDARG00000004392	194.83	174.735	72.2521	84.5572	184.783	78.4047	1.23694	0.000130372	0.00132521	hdr	5	27404946	27415081	+	1647	protein_coding	hematopoietic death receptor [Source:ZFIN;Acc:ZDB-GENE-030826-5]	Death	182	187	75	83	3.25251	2.92222	1.20569	1.41535
ENSDARG00000022788	795.379	771.826	377.638	288.31	783.602	332.974	1.23371	7.15704e-11	2.55217e-09	cops7a	16	21751922	21777545	-	1196	protein_coding	COP9 constitutive photomorphogenic homolog subunit 7A [Source:ZFIN;Acc:ZDB-GENE-030131-8680]	-	743	826	392	283	18.2851	17.7752	8.67806	6.64559
ENSDARG00000088581	1656.06	1375.46	612.698	676.458	1515.76	644.578	1.23332	5.7807e-16	3.69004e-14	f10	1	135903	142469	+	2727	protein_coding	coagulation factor X [Source:ZFIN;Acc:ZDB-GENE-021206-9]	Trypsin	1547	1472	636	664	16.6973	13.8927	6.17504	6.83851
ENSDARG00000075015	1843.39	1776.32	833.307	706.002	1809.86	769.655	1.23304	8.2706e-19	7.33137e-17	soul5	3	53476155	53486169	-	1842	protein_coding	heme-binding protein soul5 [Source:ZFIN;Acc:ZDB-GENE-110718-2]	-	1722	1901	865	693	27.5159	26.5618	12.4335	10.5663
ENSDARG00000095907	117.755	99.0479	44.3146	47.8818	108.401	46.0982	1.23295	0.00286489	0.0181764	AL928685.2	22	6300311	6316979	-	2661	processed_transcript	-	-	110	106	46	47	1.21671	1.02524	0.4577	0.496057
ENSDARG00000091771	131.671	112.13	32.7543	71.3133	121.9	52.0338	1.23028	0.00593853	0.032653	lysmd2	18	39416357	39430956	+	1527	protein_coding	LysM, putative peptidoglycan-binding, domain containing 2 [Source:ZFIN;Acc:ZDB-GENE-040801-250]	LysM	123	120	34	70	2.37087	2.02259	0.589533	1.28747
ENSDARG00000053454	114.543	80.3596	41.4245	41.7692	97.4513	41.5969	1.22625	0.00592724	0.0326073	cntn3b	6	44584775	44711942	-	6398	protein_coding	contactin 3b [Source:ZFIN;Acc:ZDB-GENE-130530-645]	fn3	107	86	43	41	0.492244	0.345955	0.177948	0.179977
ENSDARG00000003519	639.086	691.466	288.045	281.178	665.276	284.612	1.22524	2.52549e-11	9.61664e-10	aprt	7	55530532	55539805	-	2742	protein_coding	adenine phosphoribosyltransferase [Source:ZFIN;Acc:ZDB-GENE-040426-1492]	Pribosyltran	597	740	299	276	6.40837	6.94592	2.88717	2.82696
ENSDARG00000095810	396.084	368.159	157.991	169.114	382.121	163.553	1.22418	1.14848e-07	2.48479e-06	BX005108.2	9	45551053	45553365	-	1477	processed_transcript	-	-	370	394	164	166	7.3733	6.86564	2.93989	3.1565
ENSDARG00000037101	104.909	79.4252	48.1681	30.5629	92.1669	39.3655	1.22382	0.00912635	0.0457676	mtmr7a	14	30398546	30412141	+	2826	protein_coding	myotubularin related protein 7a [Source:ZFIN;Acc:ZDB-GENE-060421-7754]	-	98	85	50	30	1.02069	0.774127	0.468453	0.298145
ENSDARG00000096273	128.46	144.834	52.9849	64.182	136.647	58.5834	1.2235	0.00100695	0.0075946	si:dkey-3n22.9	19	10805858	10810006	-	2125	protein_coding	si:dkey-3n22.9 [Source:ZFIN;Acc:ZDB-GENE-120215-95]	-	120	155	55	63	1.66212	1.87732	0.685286	0.832645
ENSDARG00000079586	126.319	124.277	64.5452	42.788	125.298	53.6666	1.22133	0.00221256	0.0146401	gabrb2	14	22172047	22273847	+	3400	protein_coding	gamma-aminobutyric acid (GABA) A receptor, beta 2 [Source:ZFIN;Acc:ZDB-GENE-030131-8196]	Neur_chan_LBD	118	133	67	42	1.02151	1.00679	0.521752	0.346935
ENSDARG00000078447	120.966	116.802	50.0948	51.9569	118.884	51.0258	1.22022	0.00179449	0.0123167	tctn1	10	8416117	8434816	-	1810	protein_coding	tectonic family member 1 [Source:ZFIN;Acc:ZDB-GENE-081104-157]	-	113	125	52	51	1.83756	1.77745	0.760664	0.791352
ENSDARG00000077874	436.762	515.797	201.342	207.827	476.279	204.585	1.22005	1.5412e-08	3.89212e-07	vwa10.1	1	40291054	40307806	+	2883	protein_coding	von Willebrand factor A domain containing 10, tandem duplicate 1 [Source:ZFIN;Acc:ZDB-GENE-090313-291]	-	408	552	209	204	4.1654	4.92788	1.91942	1.9873
ENSDARG00000011072	1585.4	1534.31	565.493	777.315	1559.86	671.404	1.21677	2.32132e-13	1.11459e-11	ddx11	18	6502441	6534516	-	3733	protein_coding	DEAD/H (Asp-Glu-Ala-Asp/His) box helicase 11 [Source:ZFIN;Acc:ZDB-GENE-041114-191]	-	1481	1642	587	763	11.6772	11.3209	4.1634	5.74044
ENSDARG00000062165	205.535	179.408	95.3728	70.2946	192.471	82.8337	1.2143	0.000202711	0.00193815	tub	7	27898091	28058520	+	10918	protein_coding	tubby bipartite transcription factor [Source:ZFIN;Acc:ZDB-GENE-121009-1]	Tub	192	192	99	69	0.517606	0.452609	0.240082	0.177494
ENSDARG00000100385	215.17	201.833	78.0323	101.876	208.502	89.9542	1.21364	9.27506e-05	0.000991589	slc25a19	3	13487760	13509283	-	1820	protein_coding	solute carrier family 25 (mitochondrial thiamine pyrophosphate carrier), member 19 [Source:ZFIN;Acc:ZDB-GENE-050417-292]	Mito_carr	201	216	81	100	3.25061	3.05455	1.17837	1.54315
ENSDARG00000097082	178.773	83.1629	57.8017	55.0131	130.968	56.4074	1.21202	0.0062984	0.0342179	im:7152348	6	27884372	27891961	-	1465	protein_coding	im:7152348 [Source:ZFIN;Acc:ZDB-GENE-041111-308]	-	167	89	60	54	3.35521	1.56357	1.08438	1.03522
ENSDARG00000040991	834.987	900.775	339.103	411.58	867.881	375.341	1.21026	6.04747e-12	2.47494e-10	cttnbp2	18	20726149	20822045	-	5222	protein_coding	cortactin binding protein 2 [Source:ZFIN;Acc:ZDB-GENE-030131-8134]	-	780	964	352	404	4.39641	4.75122	1.78473	2.17282
ENSDARG00000079307	401.436	438.24	195.562	169.114	419.838	182.338	1.20305	9.27779e-08	2.03953e-06	si:dkey-205h13.1	23	26503876	26523026	-	2695	protein_coding	si:dkey-205h13.1 [Source:ZFIN;Acc:ZDB-GENE-090313-227]	CDP-OH_P_transf	375	469	203	166	4.09556	4.47898	1.99437	1.72993
ENSDARG00000055527	2151.7	3333.99	1232.14	1152.22	2742.84	1192.18	1.20252	1.02416e-11	4.09944e-10	cmn	12	13118540	13164249	+	4111	protein_coding	calymmin [Source:ZFIN;Acc:ZDB-GENE-000208-9]	-	2010	3568	1279	1131	14.3909	22.3379	8.23742	7.72669
ENSDARG00000063008	219.452	207.44	85.7391	99.8387	213.446	92.7889	1.20223	6.1649e-05	0.000693274	si:dkeyp-27e10.3	4	9784301	9810999	-	8078	protein_coding	si:dkeyp-27e10.3 [Source:ZFIN;Acc:ZDB-GENE-041210-96]	-	205	222	89	98	0.746949	0.707317	0.291712	0.340722
ENSDARG00000096667	964.517	916.66	414.245	403.43	940.589	408.838	1.20171	5.4876e-14	2.78773e-12	hemgn	1	26667872	26671210	+	2440	protein_coding	hemogen [Source:ZFIN;Acc:ZDB-GENE-121214-307]	-	901	981	430	396	10.8687	10.3477	4.66602	4.5581
ENSDARG00000092778	253.708	245.751	157.028	60.107	249.729	108.567	1.19942	0.00166444	0.0115692	si:ch73-338o16.4	3	5083407	5113772	+	8966	protein_coding	si:ch73-338o16.4 [Source:ZFIN;Acc:ZDB-GENE-131119-14]	Zona_pellucida	237	263	163	59	0.778019	0.754957	0.481345	0.184813
ENSDARG00000096834	278.329	313.029	138.724	119.195	295.679	128.96	1.19708	4.97355e-06	7.60977e-05	si:ch211-155k24.9	19	20191887	20199167	-	5770	protein_coding	si:ch211-155k24.9 [Source:ZFIN;Acc:ZDB-GENE-131127-51]	-	260	335	144	117	1.32629	1.49429	0.660777	0.569493
ENSDARG00000111934	123.107	85.9661	44.3146	46.8631	104.537	45.5888	1.1955	0.00554489	0.0309156	zgc:112234	25	35058088	35058462	+	375	protein_coding	zgc:112234 [Source:NCBI gene;Acc:554097]	Histone	115	92	46	46	9.02625	6.31425	3.24784	3.44512
ENSDARG00000024299	535.248	540.091	231.207	238.39	537.67	234.798	1.19547	1.3966e-09	4.13224e-08	c1qtnf4	7	38600150	38634845	-	3907	protein_coding	C1q and TNF related 4 [Source:ZFIN;Acc:ZDB-GENE-050417-198]	-	500	578	240	234	3.76676	3.80759	1.62643	1.6821
ENSDARG00000009131	169.138	128.949	75.1422	55.0131	149.044	65.0777	1.19274	0.00135527	0.00976747	slc10a4	20	23431485	23440955	-	1617	protein_coding	solute carrier family 10, member 4 [Source:ZFIN;Acc:ZDB-GENE-041014-249]	-	158	138	78	54	2.87599	2.19652	1.27718	0.937912
ENSDARG00000097310	119.896	91.5726	60.6918	31.5816	105.734	46.1367	1.19262	0.00953319	0.0472981	zgc:193812	25	19485328	19486415	-	792	protein_coding	zgc:193812 [Source:ZFIN;Acc:ZDB-GENE-081022-44]	-	112	98	63	31	4.1623	3.18468	2.10612	1.0993
ENSDARG00000013292	202.324	200.899	106.933	69.2758	201.611	88.1045	1.1925	0.000287877	0.00261213	tmem179	20	27393668	27396568	+	1154	protein_coding	transmembrane protein 179 [Source:ZFIN;Acc:ZDB-GENE-040808-25]	-	189	215	111	68	4.82055	4.7951	2.54674	1.65494
ENSDARG00000041572	92.0627	105.589	34.681	51.9569	98.8257	43.3189	1.19249	0.00711507	0.03762	zfpm1	18	17270427	17399376	-	5050	protein_coding	zinc finger protein, FOG family member 1 [Source:ZFIN;Acc:ZDB-GENE-050419-238]	-	86	113	36	51	0.501242	0.575907	0.188747	0.283633
ENSDARG00000033949	102.768	90.6382	31.7909	52.9756	96.7029	42.3833	1.1916	0.00892896	0.0450563	fbxo16	20	35208020	35254641	+	1915	protein_coding	F-box protein 16 [Source:ZFIN;Acc:ZDB-GENE-041015-747]	-	96	97	33	52	1.47551	1.30367	0.456261	0.762628
ENSDARG00000053554	179.843	182.211	93.446	65.2008	181.027	79.3234	1.1889	0.000401599	0.00345366	wdr76	7	30201611	30209790	+	2077	protein_coding	WD repeat domain 76 [Source:ZFIN;Acc:ZDB-GENE-030131-4513]	-	168	195	97	64	2.38075	2.41637	1.23653	0.86541
ENSDARG00000052895	153.081	134.556	69.362	57.0507	143.818	63.2063	1.18444	0.0010814	0.00806447	htra3a	1	40740951	40759629	+	3444	protein_coding	HtrA serine peptidase 3a [Source:ZFIN;Acc:ZDB-GENE-040801-245]	-	143	144	72	56	1.22212	1.07613	0.553525	0.456671
ENSDARG00000098800	378.956	367.225	175.332	153.833	373.09	164.582	1.17998	4.3001e-07	8.28792e-06	znf1156	22	1911269	1919599	+	1269	protein_coding	zinc finger protein 1156 [Source:ZFIN;Acc:ZDB-GENE-050208-787]	zf-C2H2	354	393	182	151	8.21074	7.9707	3.79732	3.3419
ENSDARG00000056695	256.919	255.095	122.347	103.914	256.007	113.13	1.17742	1.98634e-05	0.000259029	phc2a	23	22063484	22130778	-	4007	protein_coding	polyhomeotic homolog 2a (Drosophila) [Source:ZFIN;Acc:ZDB-GENE-020312-1]	SAM_1	240	273	127	102	1.76292	1.75351	0.839175	0.714923
ENSDARG00000003495	384.308	496.174	135.834	254.691	440.241	195.262	1.1751	5.03195e-05	0.000581382	madd	7	34317401	34413398	-	7797	protein_coding	MAP-kinase activating death domain [Source:ZFIN;Acc:ZDB-GENE-030131-8076]	DENN	359	531	141	250	1.35521	1.7528	0.478806	0.900515
ENSDARG00000103186	367.18	320.504	178.222	126.326	343.842	152.274	1.17318	7.96066e-06	0.00011543	si:ch73-389k6.1	4	76304911	76335199	+	3718	protein_coding	si:ch73-389k6.1 [Source:ZFIN;Acc:ZDB-GENE-091204-408]	THAP	343	343	185	124	2.71535	2.37438	1.31744	0.936679
ENSDARG00000069168	406.788	474.682	230.243	160.964	440.735	195.604	1.1714	1.56186e-06	2.67163e-05	si:dkey-73n10.1	18	18931484	18942098	-	4428	protein_coding	si:dkey-73n10.1 [Source:ZFIN;Acc:ZDB-GENE-030131-9311]	-	380	508	239	158	2.5259	2.95271	1.42909	1.00214
ENSDARG00000013669	715.091	549.436	257.217	304.61	632.263	280.914	1.16993	2.47222e-08	5.99439e-07	napba	17	4297076	4318428	-	2635	protein_coding	N-ethylmaleimide-sensitive factor attachment protein, beta a [Source:ZFIN;Acc:ZDB-GENE-050522-230]	-	668	588	267	299	7.46168	5.74331	2.68286	3.1869
ENSDARG00000091126	366.11	299.947	142.577	153.833	333.028	148.205	1.16734	3.42817e-06	5.45493e-05	rnf207a	11	29671661	29677714	+	835	protein_coding	ring finger protein 207a [Source:ZFIN;Acc:ZDB-GENE-120813-7]	-	342	321	148	151	12.0554	9.89427	4.69292	5.07889
ENSDARG00000045131	161.645	131.752	66.4719	64.182	146.699	65.327	1.16575	0.00112356	0.00833907	id4	16	9977858	9980402	-	1191	protein_coding	inhibitor of DNA binding 4 [Source:ZFIN;Acc:ZDB-GENE-051113-208]	HLH	151	141	69	63	3.73169	3.047	1.53393	1.48562
ENSDARG00000097573	122.037	124.277	54.9116	55.0131	123.157	54.9624	1.1641	0.00226294	0.0149104	si:ch211-107e6.5	25	10568514	10571078	-	628	protein_coding	si:ch211-107e6.5 [Source:ZFIN;Acc:ZDB-GENE-131121-206]	-	114	133	57	54	5.34301	5.45076	2.40316	2.41497
ENSDARG00000068989	131.671	112.13	36.6077	72.3321	121.9	54.4699	1.16395	0.00715983	0.037811	gabra1	21	42050351	42100471	-	2305	protein_coding	gamma-aminobutyric acid (GABA) A receptor, alpha 1 [Source:ZFIN;Acc:ZDB-GENE-061013-194]	Neur_chan_LBD	123	120	38	71	1.57063	1.33991	0.436496	0.865099
ENSDARG00000090108	204.465	257.898	90.5559	116.139	231.182	103.347	1.16373	0.000124413	0.00127112	si:ch1073-174d20.1	25	37126921	37137446	+	3152	protein_coding	si:ch1073-174d20.1 [Source:ZFIN;Acc:ZDB-GENE-121214-359]	-	191	276	94	114	1.78356	2.25366	0.789604	1.01577
ENSDARG00000104384	756.841	1045.61	367.041	439.086	901.225	403.064	1.16228	5.00504e-09	1.35291e-07	AGBL1	25	11389220	11706389	+	6721	protein_coding	si:ch73-141f14.1 [Source:ZFIN;Acc:ZDB-GENE-131127-336]	-	707	1119	381	431	3.09618	4.2851	1.50093	1.80103
ENSDARG00000035360	601.619	718.564	309.239	281.178	660.092	295.209	1.16137	1.67569e-09	4.87242e-08	mink1	5	38301906	38384755	-	8663	protein_coding	misshapen-like kinase 1 [Source:ZFIN;Acc:ZDB-GENE-060526-45]	Pkinase	562	769	321	276	1.90945	2.28467	0.981081	0.894786
ENSDARG00000024492	4284.13	4225.42	1788.96	2018.17	4254.77	1903.56	1.16056	2.84059e-25	4.23094e-23	col9a2	19	38422059	38467554	+	3866	protein_coding	procollagen, type IX, alpha 2 [Source:ZFIN;Acc:ZDB-GENE-030131-9786]	Collagen	4002	4522	1857	1981	30.4688	30.1047	12.718	14.3913
ENSDARG00000077072	175.561	156.982	70.3254	78.4447	166.271	74.385	1.16031	0.000521668	0.00433799	si:ch73-280o22.2	5	50084936	50371205	-	6111	protein_coding	si:ch73-280o22.2 [Source:ZFIN;Acc:ZDB-GENE-141216-272]	-	164	168	73	77	0.7899	0.707558	0.316285	0.353881
ENSDARG00000100106	219.452	208.374	106.933	84.5572	213.913	95.7452	1.15842	0.000130227	0.00132434	CR385054.1	12	43852970	43982343	-	703	protein_coding	-	-	205	223	111	83	8.583	8.16422	4.18057	3.3159
ENSDARG00000079805	103.838	92.507	46.2413	41.7692	98.1726	44.0053	1.15644	0.00678803	0.0362056	tagln3a	5	67869785	67878064	-	1052	protein_coding	transgelin 3a [Source:ZFIN;Acc:ZDB-GENE-060531-53]	CH	97	99	48	41	2.71392	2.42206	1.20807	1.09458
ENSDARG00000029296	274.047	228.931	115.603	110.026	251.489	112.815	1.15533	3.73047e-05	0.00044682	nexmifb	14	11103718	11268375	+	8055	protein_coding	neurite extension and migration factor b [Source:ZFIN;Acc:ZDB-GENE-140106-18]	-	256	245	120	108	0.935438	0.782827	0.394442	0.376562
ENSDARG00000103478	127.389	95.3102	52.9849	46.8631	111.35	49.924	1.15506	0.00512333	0.0290685	nsun6	7	71776905	71788110	+	1869	protein_coding	NOL1/NOP2/Sun domain family, member 6 [Source:ZFIN;Acc:ZDB-GENE-080808-8]	-	119	102	55	46	1.87404	1.40461	0.77915	0.691237
ENSDARG00000067713	428.198	381.241	183.039	180.321	404.72	181.68	1.15484	2.78522e-07	5.59472e-06	snx18a	5	40272848	40292299	-	2472	protein_coding	sorting nexin 18a [Source:ZFIN;Acc:ZDB-GENE-070705-339]	PX	400	408	190	177	4.76269	4.24793	2.03504	2.01096
ENSDARG00000100133	1458.02	1528.7	671.463	670.345	1493.36	670.904	1.15456	1.98498e-17	1.54666e-15	cnmd	9	53725128	53744243	+	2208	protein_coding	chondromodulin [Source:ZFIN;Acc:ZDB-GENE-010713-1]	-	1362	1636	697	658	18.1559	19.0699	8.35799	8.36961
ENSDARG00000103634	508.486	449.453	236.023	194.584	478.969	215.304	1.15223	1.24994e-07	2.6862e-06	CU914622.2	12	43701777	43711918	-	5779	protein_coding	-	-	475	481	245	191	2.41926	2.14219	1.12249	0.928237
ENSDARG00000043527	129.53	116.802	57.8017	52.9756	123.166	55.3886	1.1519	0.00263951	0.0169977	plpp6	20	15142972	15161669	-	1714	protein_coding	phospholipid phosphatase 6 [Source:ZFIN;Acc:ZDB-GENE-040724-247]	-	121	125	60	52	2.07786	1.877	0.926848	0.852061
ENSDARG00000056515	200.183	276.587	107.896	106.97	238.385	107.433	1.15144	0.000120086	0.00122921	spsb1	23	22496314	22523303	-	2524	protein_coding	splA/ryanodine receptor domain and SOCS box containing 1 [Source:ZFIN;Acc:ZDB-GENE-030131-6122]	SPRY	187	296	112	105	2.18069	3.01834	1.17489	1.16836
ENSDARG00000090844	265.483	299.013	127.164	127.345	282.248	127.254	1.14992	1.15512e-05	0.00015987	CABZ01054965.1	9	52971097	52999318	-	5008	protein_coding	-	TIR	248	320	132	125	1.45757	1.64456	0.697875	0.70101
ENSDARG00000070337	161.645	121.474	70.3254	57.0507	141.559	63.688	1.14983	0.00209627	0.0140371	hoxc1a	23	36178104	36190988	+	8400	protein_coding	homeobox C1a [Source:ZFIN;Acc:ZDB-GENE-000822-2]	Homeobox	151	130	73	56	0.529101	0.398317	0.230097	0.187235
ENSDARG00000078247	200.183	215.85	84.7758	102.895	208.016	93.8354	1.14979	0.000156662	0.00154859	vip	13	46987955	46991577	-	1109	protein_coding	vasoactive intestinal peptide [Source:ZFIN;Acc:ZDB-GENE-080204-3]	-	187	231	88	101	4.96308	5.361	2.10097	2.55781
ENSDARG00000039726	241.932	183.145	106.933	84.5572	212.539	95.7452	1.14808	0.000285066	0.00258984	zgc:123321	13	9432501	9436539	+	878	protein_coding	zgc:123321 [Source:ZFIN;Acc:ZDB-GENE-051023-1]	-	226	196	111	83	7.57626	5.74549	3.34731	2.65498
ENSDARG00000056519	190.548	215.85	104.043	79.4634	203.199	91.7532	1.14658	0.000259351	0.00239333	si:dkey-280e21.3	14	25464681	25502537	+	6742	protein_coding	si:dkey-280e21.3 [Source:ZFIN;Acc:ZDB-GENE-140106-61]	-	178	231	108	78	0.777091	0.881837	0.424134	0.324926
ENSDARG00000091728	274.047	219.587	105.97	117.158	246.817	111.564	1.14482	6.4446e-05	0.000721364	zgc:114046	25	35044524	35045250	-	727	protein_coding	zgc:114046 [Source:ZFIN;Acc:ZDB-GENE-050320-24]	Histone	256	235	110	115	10.3645	8.31953	4.00614	4.44265
ENSDARG00000098334	148.799	131.752	59.7284	67.2383	140.276	63.4833	1.14364	0.00155846	0.0109754	exosc3	14	52476520	52480661	-	1281	protein_coding	exosome component 3 [Source:ZFIN;Acc:ZDB-GENE-050706-140]	-	139	141	62	66	3.19379	2.83293	1.28148	1.44702
ENSDARG00000069471	646.58	450.388	244.694	252.653	548.484	248.673	1.13995	5.35816e-07	1.0131e-05	mhc1zca	1	47140788	47151790	-	2187	protein_coding	major histocompatibility complex class I ZCA [Source:ZFIN;Acc:ZDB-GENE-070424-4]	MHC_I	604	482	254	248	8.12885	5.67236	3.07505	3.18479
ENSDARG00000095807	313.655	237.341	93.446	156.889	275.498	125.168	1.13872	0.000293455	0.00265285	hp	8	50143194	50147948	-	631	protein_coding	haptoglobin [Source:ZFIN;Acc:ZDB-GENE-030131-1259]	-	293	254	97	154	13.6672	10.3602	4.07015	6.8544
ENSDARG00000052766	109.191	86.9005	47.2047	41.7692	98.0456	44.487	1.13813	0.00841857	0.0431371	EVI5L	1	45217425	45282774	+	3027	protein_coding	si:ch211-239f4.1 [Source:ZFIN;Acc:ZDB-GENE-061207-24]	TBC	102	93	49	41	0.99181	0.790744	0.428599	0.380408
ENSDARG00000104436	1656.06	1717.45	743.715	790.559	1686.76	767.137	1.13701	6.60735e-18	5.45917e-16	zgc:153426	3	49559261	49566364	-	1750	protein_coding	zgc:153426 [Source:ZFIN;Acc:ZDB-GENE-060929-220]	Tubulin	1547	1838	772	776	26.0191	27.0317	11.6801	12.4538
ENSDARG00000002295	582.35	683.991	266.851	309.704	633.171	288.277	1.13637	7.31074e-09	1.92159e-07	si:dkey-21p1.3	8	14855471	14883692	+	3378	protein_coding	si:dkey-21p1.3 [Source:ZFIN;Acc:ZDB-GENE-081105-162]	Collagen	544	732	277	304	4.74002	5.57721	2.17114	2.52751
ENSDARG00000076585	250.496	228.931	105.006	113.083	239.714	109.044	1.13621	5.26968e-05	0.000604715	si:ch211-113e8.11	1	40107811	40115242	+	3802	protein_coding	si:ch211-113e8.11 [Source:ZFIN;Acc:ZDB-GENE-090313-12]	zf-CCCH	234	245	109	111	1.81153	1.65851	0.759071	0.819953
ENSDARG00000102679	186.266	197.161	96.3361	78.4447	191.714	87.3904	1.13281	0.000322379	0.00287047	FP074874.2	4	76403698	76413981	+	5673	protein_coding	-	zf-C2H2	174	211	100	77	0.90277	0.957271	0.466719	0.381203
ENSDARG00000103156	110.261	134.556	58.765	52.9756	122.408	55.8703	1.13224	0.00349524	0.021323	gpc6a	1	2712956	3036019	+	2021	protein_coding	glypican 6a [Source:ZFIN;Acc:ZDB-GENE-071004-15]	-	103	144	61	52	1.50007	1.83384	0.799156	0.722629
ENSDARG00000069184	279.399	249.489	107.896	133.458	264.444	120.677	1.1321	4.16144e-05	0.000491338	ubtd2	21	35215810	35281609	+	2273	protein_coding	ubiquitin domain containing 2 [Source:ZFIN;Acc:ZDB-GENE-040718-473]	ubiquitin	261	267	112	131	3.37973	3.02327	1.30463	1.61864
ENSDARG00000001937	811.436	576.534	333.323	300.535	693.985	316.929	1.12928	8.6395e-08	1.90495e-06	LO018422.1	17	48433817	48458789	+	5631	protein_coding	-	Sugar_tr	758	617	346	295	3.96209	2.8201	1.62689	1.47135
ENSDARG00000053201	10154.7	6733.39	3683.89	4048.56	8444.06	3866.23	1.12697	0.000167416	0.00164302	zgc:172323	16	32736588	32744258	+	3344	protein_coding	zgc:172323 [Source:ZFIN;Acc:ZDB-GENE-080204-113]	Filament	9486	7206	3824	3974	83.4945	55.4617	30.2775	33.3764
ENSDARG00000062797	716.162	598.959	296.715	305.629	657.561	301.172	1.12584	3.43029e-09	9.51916e-08	nell2b	4	14247693	14328997	-	5154	protein_coding	neural EGFL like 2b [Source:ZFIN;Acc:ZDB-GENE-030131-8026]	EGF_CA	669	641	308	300	3.82052	3.20095	1.58225	1.63476
ENSDARG00000097938	314.726	337.324	151.248	147.72	326.025	149.484	1.12528	3.807e-06	6.00969e-05	asb5a	14	36398282	36412506	-	1700	protein_coding	ankyrin repeat and SOCS box containing 5a [Source:ZFIN;Acc:ZDB-GENE-070424-269]	SOCS_box	294	361	157	145	5.09025	5.46542	2.44522	2.39551
ENSDARG00000077840	674.413	684.926	345.847	277.103	679.669	311.475	1.12501	3.57325e-09	9.87831e-08	meis2b	20	10098590	10120442	-	3889	protein_coding	Meis homeobox 2b [Source:ZFIN;Acc:ZDB-GENE-000210-23]	Coprinus_mating	630	733	359	272	4.76808	4.851	2.44413	1.96431
ENSDARG00000059781	147.728	137.359	40.4612	90.6698	142.544	65.5655	1.1227	0.00780869	0.0405915	atcayb	2	55914699	55970970	+	10170	protein_coding	ataxia, cerebellar, Cayman type b [Source:ZFIN;Acc:ZDB-GENE-070912-220]	-	138	147	42	89	0.399392	0.372016	0.109344	0.24578
ENSDARG00000014675	169.138	157.916	60.6918	89.6511	163.527	75.1714	1.12254	0.00140896	0.0100979	efna3a	19	8144556	8339860	+	4728	protein_coding	ephrin-A3a [Source:ZFIN;Acc:ZDB-GENE-060503-186]	-	158	169	63	88	0.983604	0.919972	0.352802	0.522737
ENSDARG00000001127	166.997	138.293	80.9223	59.0882	152.645	70.0053	1.12227	0.00184334	0.0125967	slc17a6a	25	35250976	35271284	+	2608	protein_coding	solute carrier family 17 (vesicular glutamate transporter), member 6a [Source:ZFIN;Acc:ZDB-GENE-050105-4]	MFS_1	156	148	84	58	1.76059	1.46056	0.852785	0.624595
ENSDARG00000099511	710.809	548.501	211.939	366.754	629.655	289.347	1.12225	1.06171e-05	0.000148349	CABZ01034698.2	22	7971101	8074212	-	3146	protein_coding	-	-	664	587	220	360	6.21227	4.80225	1.85153	3.21382
ENSDARG00000095427	594.125	512.993	275.521	233.297	553.559	254.409	1.12031	5.19233e-08	1.19544e-06	FP101887.1	19	27463934	27469262	-	1526	processed_transcript	-	-	555	549	286	229	10.7048	9.25941	4.96226	4.21463
ENSDARG00000090778	266.554	242.948	101.153	133.458	254.751	117.305	1.11947	8.20731e-05	0.000888719	ttll1	4	77919987	77932570	+	2064	protein_coding	tubulin tyrosine ligase-like family, member 1 [Source:ZFIN;Acc:ZDB-GENE-040426-1326]	TTL	249	260	105	131	3.55083	3.24212	1.34694	1.78254
ENSDARG00000070498	271.906	241.079	110.787	125.308	256.492	118.047	1.11942	4.68476e-05	0.000546595	phyhiplb	12	7445595	7513794	+	3120	protein_coding	phytanoyl-CoA 2-hydroxylase interacting protein-like b [Source:ZFIN;Acc:ZDB-GENE-040927-27]	fn3	254	258	115	123	2.39618	2.12829	0.975913	1.10721
ENSDARG00000070575	196.971	197.161	85.7391	95.7636	197.066	90.7514	1.1192	0.000251782	0.00233592	fam131bb	16	17389116	17467462	+	2810	protein_coding	family with sequence similarity 131, member Bb [Source:ZFIN;Acc:ZDB-GENE-100922-12]	-	184	211	89	94	1.92731	1.9326	0.838594	0.939507
ENSDARG00000023369	120.966	101.851	61.6551	40.7505	111.409	51.2028	1.11884	0.00763298	0.0398104	mxd	25	19718504	19731255	+	2472	protein_coding	myxovirus (influenza virus) resistance D [Source:ZFIN;Acc:ZDB-GENE-030721-8]	-	113	109	64	40	1.34546	1.13486	0.685487	0.454454
ENSDARG00000100722	259.06	221.456	103.08	118.176	240.258	110.628	1.11859	8.90481e-05	0.000956209	si:ch211-160f23.7	17	27176243	27183448	+	7206	protein_coding	si:ch211-160f23.7 [Source:ZFIN;Acc:ZDB-GENE-141216-470]	-	242	237	107	116	0.988466	0.846485	0.393149	0.452108
ENSDARG00000007975	1413.05	1484.78	614.624	721.284	1448.92	667.954	1.11778	1.971e-14	1.05772e-12	fth1b	25	3058924	3066067	+	1606	protein_coding	ferritin, heavy polypeptide 1b [Source:ZFIN;Acc:ZDB-GENE-040912-30]	Ferritin	1320	1589	638	708	24.1919	25.465	10.5182	12.3813
ENSDARG00000086665	316.867	288.734	141.614	137.533	302.8	139.573	1.11669	9.52553e-06	0.000134904	si:dkey-175g6.2	10	23022263	23026529	+	3278	protein_coding	si:dkey-175g6.2 [Source:ZFIN;Acc:ZDB-GENE-030131-8061]	-	296	309	147	135	2.65781	2.42613	1.18734	1.15665
ENSDARG00000057167	4626.68	5012.2	2484.51	1967.23	4819.44	2225.87	1.11434	6.75034e-18	5.53553e-16	eif4g2b	18	16715864	16726206	+	4669	protein_coding	eukaryotic translation initiation factor 4, gamma 2b [Source:ZFIN;Acc:ZDB-GENE-030131-6550]	-	4322	5364	2579	1931	27.2459	29.5686	14.625	11.6155
ENSDARG00000063288	145.587	257.898	99.2262	87.6135	201.743	93.4199	1.11266	0.00161657	0.011301	slc2a11b	5	10014604	10046183	+	2868	protein_coding	solute carrier family 2 (facilitated glucose transporter), member 11b [Source:ZFIN;Acc:ZDB-GENE-070705-96]	Sugar_tr	136	276	103	86	1.39573	2.47682	0.950881	0.842166
ENSDARG00000053323	133.812	120.539	60.6918	57.0507	127.176	58.8712	1.11026	0.00306664	0.0192115	zgc:112285	12	35051636	35070011	-	2189	protein_coding	zgc:112285 [Source:ZFIN;Acc:ZDB-GENE-050913-132]	-	125	129	63	56	1.68076	1.51673	0.762014	0.71849
ENSDARG00000058504	115.614	214.915	97.2995	56.0319	165.264	76.6657	1.10875	0.00722431	0.0380872	ap1s2	11	12719944	12728353	+	1856	protein_coding	adaptor-related protein complex 1, sigma 2 subunit [Source:ZFIN;Acc:ZDB-GENE-030131-5448]	-	108	230	101	55	1.71272	3.18945	1.44083	0.832268
ENSDARG00000075933	612.324	567.189	247.584	299.516	589.757	273.55	1.10866	2.35081e-08	5.73174e-07	cox15	13	713941	724385	+	1583	protein_coding	cytochrome c oxidase assembly homolog 15 (yeast) [Source:ZFIN;Acc:ZDB-GENE-040426-955]	-	572	607	257	294	10.6355	9.869	4.29853	5.21609
ENSDARG00000078113	1696.74	1639.9	725.411	835.385	1668.32	780.398	1.09638	2.00226e-15	1.2077e-13	atp5mea	21	20377752	20381481	-	557	protein_coding	ATP synthase membrane subunit ea [Source:ZFIN;Acc:ZDB-GENE-070928-12]	-	1585	1755	753	820	83.7558	81.0937	35.7938	41.3463
ENSDARG00000035732	131.671	237.341	95.3728	77.4259	184.506	86.3993	1.09631	0.00296114	0.0186681	arntl1b	7	66048102	66105828	+	3645	protein_coding	aryl hydrocarbon receptor nuclear translocator-like 1b [Source:ZFIN;Acc:ZDB-GENE-030408-1]	HLH	123	254	99	76	0.993227	1.7935	0.719127	0.585591
ENSDARG00000012035	90.9922	134.556	55.8749	49.9193	112.774	52.8971	1.09384	0.00849053	0.0434245	zgc:100832	23	16814968	16823262	+	3084	protein_coding	zgc:100832 [Source:ZFIN;Acc:ZDB-GENE-040801-53]	-	85	144	58	49	0.811233	1.20175	0.497945	0.446231
ENSDARG00000033307	886.371	1103.54	441.219	492.062	994.957	466.641	1.0934	3.05776e-10	1.00374e-08	igf2b	25	24039364	24046870	-	3385	protein_coding	insulin-like growth factor 2b [Source:ZFIN;Acc:ZDB-GENE-030131-2935]	-	828	1181	458	483	7.19967	8.97959	3.58241	4.00744
ENSDARG00000043798	115.614	126.146	68.3986	44.8255	120.88	56.6121	1.09309	0.00650095	0.03505	ms4a17a.1	4	76692834	76701249	+	1084	protein_coding	membrane-spanning 4-domains, subfamily A, member 17A.1 [Source:ZFIN;Acc:ZDB-GENE-050417-307]	-	108	135	71	44	2.93248	3.20531	1.73419	1.13999
ENSDARG00000101510	220.522	228.931	106.933	103.914	224.727	105.423	1.09207	0.000131546	0.00133528	cetn2	14	14662116	14666556	+	2045	protein_coding	centrin, EF-hand protein, 2 [Source:ZFIN;Acc:ZDB-GENE-091118-94]	-	206	245	111	102	2.96493	3.08346	1.43714	1.40083
ENSDARG00000044511	1371.31	1327.8	540.446	726.377	1349.55	633.411	1.09185	5.44121e-11	1.98228e-09	etv5b	6	14030903	14040161	-	4118	protein_coding	ets variant 5b [Source:ZFIN;Acc:ZDB-GENE-991228-4]	ETS_PEA3_N	1281	1421	561	713	9.15595	8.88123	3.60699	4.86275
ENSDARG00000045071	1765.25	1586.64	791.883	780.372	1675.94	786.127	1.09172	5.85209e-16	3.72475e-14	chad	12	26512569	26525699	+	2600	protein_coding	chondroadherin [Source:ZFIN;Acc:ZDB-GENE-040426-1130]	-	1649	1698	822	766	18.6676	16.8085	8.37079	8.27435
ENSDARG00000087452	316.867	341.996	164.735	144.664	329.431	154.699	1.09038	8.31595e-06	0.000119709	peli3	7	18121722	18168493	-	2609	protein_coding	pellino E3 ubiquitin protein ligase family member 3 [Source:ZFIN;Acc:ZDB-GENE-110304-4]	-	296	366	171	142	3.33932	3.61054	1.73536	1.5286
ENSDARG00000079645	734.36	602.697	297.679	330.079	668.529	313.879	1.09029	1.64061e-08	4.10739e-07	sc:d217	22	7896072	8006342	-	2814	protein_coding	sc:d217 [Source:ZFIN;Acc:ZDB-GENE-080303-15]	-	686	645	309	324	7.17531	5.89931	2.90738	3.2337
ENSDARG00000060656	262.272	218.653	91.5193	134.477	240.462	112.998	1.09007	0.000347779	0.00305563	si:ch211-10a23.2	13	33117528	33123240	+	1951	protein_coding	si:ch211-10a23.2 [Source:ZFIN;Acc:ZDB-GENE-090313-9]	-	245	234	95	132	3.69615	3.08691	1.28924	1.90018
ENSDARG00000013020	214.099	178.473	89.5926	94.7449	196.286	92.1687	1.08981	0.000438792	0.00372523	dtnbb	17	37070096	37156520	-	2483	protein_coding	dystrobrevin, beta b [Source:ZFIN;Acc:ZDB-GENE-070117-3]	ZZ	200	191	93	93	2.3708	1.9798	0.991686	1.05192
ENSDARG00000096829	784.674	706.417	420.025	280.16	745.545	350.093	1.08921	2.85952e-07	5.71773e-06	blvrb	18	46151505	46160108	+	1652	protein_coding	biliverdin reductase B [Source:ZFIN;Acc:ZDB-GENE-030131-1516]	-	733	756	436	275	13.0597	11.7781	6.98786	4.67521
ENSDARG00000063663	378.956	375.634	171.478	183.377	377.295	177.428	1.0887	1.64632e-06	2.79644e-05	clp1	14	48982236	48998631	+	4292	protein_coding	cleavage and polyadenylation factor I subunit 1 [Source:ZFIN;Acc:ZDB-GENE-030131-5306]	Clp1	354	402	178	180	2.42764	2.41064	1.09807	1.17785
ENSDARG00000091783	5796.74	6169	2874.67	2758.81	5982.87	2816.74	1.08686	7.82549e-27	1.30793e-24	si:dkeyp-71f10.5	3	30998362	31019832	-	933	protein_coding	si:dkeyp-71f10.5 [Source:ZFIN;Acc:ZDB-GENE-131121-547]	-	5415	6602	2984	2708	170.827	182.121	84.6808	81.5165
ENSDARG00000079656	174.491	137.359	68.3986	78.4447	155.925	73.4217	1.08581	0.00187886	0.0127995	fam171a2b	24	36812640	36826504	-	3169	protein_coding	family with sequence similarity 171, member A2b [Source:ZFIN;Acc:ZDB-GENE-161227-1]	-	163	147	71	77	1.51393	1.19388	0.593204	0.682412
ENSDARG00000071468	268.695	229.866	153.174	81.501	249.28	117.338	1.0846	0.00104287	0.00782639	mrpl54	22	15719347	15720347	-	699	protein_coding	mitochondrial ribosomal protein L54 [Source:ZFIN;Acc:ZDB-GENE-050208-381]	-	251	246	159	80	10.5691	9.05781	6.02265	3.21434
ENSDARG00000097804	533.107	532.616	282.265	220.053	532.862	251.159	1.08427	2.2991e-07	4.67832e-06	lypc	15	39957809	39963009	-	1019	protein_coding	ly6 domain containing, pigment cell [Source:ZFIN;Acc:ZDB-GENE-131127-361]	-	498	570	293	216	14.3845	14.3968	7.6131	5.9533
ENSDARG00000089243	656.214	698.942	312.129	328.041	677.578	320.085	1.08243	1.59263e-09	4.64943e-08	r3hcc1l	1	54948059	54958463	+	1704	protein_coding	R3H domain and coiled-coil containing 1-like [Source:ZFIN;Acc:ZDB-GENE-030131-4156]	-	613	748	324	322	10.5884	11.2979	5.03435	5.30719
ENSDARG00000069624	474.23	370.962	160.881	238.39	422.596	199.636	1.08215	2.57583e-05	0.000322457	mrps18c	21	19328847	19330333	-	720	protein_coding	mitochondrial ribosomal protein S18C [Source:ZFIN;Acc:ZDB-GENE-060503-609]	-	443	397	167	234	18.1097	14.1913	6.14118	9.12771
ENSDARG00000009764	254.778	196.227	99.2262	114.101	225.503	106.664	1.07926	0.000323613	0.00288029	srek1	5	55160348	55201172	-	1879	protein_coding	splicing regulatory glutamine/lysine-rich protein 1 [Source:ZFIN;Acc:ZDB-GENE-040801-132]	RRM_1	238	210	103	112	3.72813	2.87646	1.45137	1.67405
ENSDARG00000101716	200.183	192.489	74.1788	112.064	196.336	93.1213	1.07756	0.000970465	0.00735491	BACE1	15	93131	97205	-	663	protein_coding	beta-secretase 1 [Source:HGNC Symbol;Acc:HGNC:933]	Asp	187	206	77	110	8.30174	7.99685	3.075	4.6597
ENSDARG00000069361	110.261	107.458	43.3513	60.107	108.859	51.7291	1.07472	0.00892596	0.0450516	spa17	15	22267847	22286918	+	1941	protein_coding	sperm autoantigenic protein 17 [Source:ZFIN;Acc:ZDB-GENE-061027-337]	RIIa	103	115	45	59	1.5619	1.52489	0.61384	0.853699
ENSDARG00000017446	159.504	130.818	66.4719	71.3133	145.161	68.8926	1.07437	0.00251026	0.0162899	camk1db	25	7987920	8030425	-	4401	protein_coding	calcium/calmodulin-dependent protein kinase 1Db [Source:ZFIN;Acc:ZDB-GENE-070112-1872]	Pkinase	149	140	69	70	0.996496	0.818732	0.415112	0.446709
ENSDARG00000029832	226.945	222.391	117.53	95.7636	224.668	106.647	1.07395	0.000225771	0.00212521	slc26a1	21	20324562	20329541	-	2972	protein_coding	solute carrier family 26 (anion exchanger), member 1 [Source:ZFIN;Acc:ZDB-GENE-070112-2182]	Sulfate_transp	212	238	122	94	2.09956	2.06107	1.08687	0.888295
ENSDARG00000103763	282.611	297.144	124.274	151.796	289.877	138.035	1.07152	4.05733e-05	0.000481753	l3hypdh	6	13083146	13091856	+	1255	protein_coding	trans-L-3-hydroxyproline dehydratase [Source:ZFIN;Acc:ZDB-GENE-170412-1]	-	264	318	129	149	6.19157	6.52152	2.72153	3.33442
ENSDARG00000030547	345.77	362.553	169.552	168.096	354.161	168.824	1.06912	4.28764e-06	6.66274e-05	rnd1a	23	17800717	17815253	+	3940	protein_coding	Rho family GTPase 1a [Source:ZFIN;Acc:ZDB-GENE-040630-6]	Ras	323	388	176	165	2.41294	2.53455	1.18273	1.17616
ENSDARG00000053542	134.883	114.933	54.9116	64.182	124.908	59.5468	1.06851	0.0049922	0.028435	kctd12.2	1	34295925	34297403	+	1479	protein_coding	potassium channel tetramerisation domain containing 12.2 [Source:ZFIN;Acc:ZDB-GENE-060117-4]	K_tetra	126	123	57	63	2.50751	2.14044	1.02041	1.19633
ENSDARG00000099112	115.614	125.211	56.8383	58.0694	120.413	57.4539	1.06811	0.00510908	0.0290027	si:dkey-71l4.3	4	75603917	75616197	-	4639	protein_coding	si:dkey-71l4.3 [Source:ZFIN;Acc:ZDB-GENE-120703-25]	NACHT	108	134	59	57	0.685236	0.74344	0.336741	0.345087
ENSDARG00000034168	137.023	121.474	49.1314	74.3696	129.249	61.7505	1.06668	0.00617008	0.0336789	serpini1	18	5137241	5170417	+	4689	protein_coding	serpin peptidase inhibitor, clade I (neuroserpin), member 1 [Source:ZFIN;Acc:ZDB-GENE-060503-390]	Serpin	128	130	51	73	0.803472	0.713557	0.287977	0.437241
ENSDARG00000088764	142.376	126.146	71.2887	57.0507	134.261	64.1697	1.06336	0.00399519	0.0237833	lyplal1	16	2637478	2650375	-	1413	protein_coding	lysophospholipase-like 1 [Source:ZFIN;Acc:ZDB-GENE-050306-32]	Abhydrolase_2	133	135	74	56	2.77045	2.45899	1.38662	1.11307
ENSDARG00000062506	413.211	349.471	131.98	233.297	381.341	182.638	1.06303	0.000180907	0.00175496	zc3h18	18	17076680	17147803	-	7173	protein_coding	zinc finger CCCH-type containing 18 [Source:ZFIN;Acc:ZDB-GENE-050419-13]	-	386	374	137	229	1.5839	1.34195	0.505694	0.896629
ENSDARG00000069632	190.548	210.243	100.19	91.6886	200.396	95.9391	1.06285	0.000442093	0.00375034	emp1	1	45323142	45330451	+	1459	protein_coding	epithelial membrane protein 1 [Source:ZFIN;Acc:ZDB-GENE-070822-2]	-	178	225	104	90	3.59092	3.9691	1.88732	1.73247
ENSDARG00000052765	452.82	446.65	219.646	210.884	449.735	215.265	1.06272	3.99312e-07	7.73028e-06	gria2b	14	35748206	35813662	+	5242	protein_coding	glutamate receptor, ionotropic, AMPA 2b [Source:ZFIN;Acc:ZDB-GENE-020125-4]	Lig_chan	423	478	228	207	2.37511	2.34691	1.15161	1.10905
ENSDARG00000109276	1698.88	1731.47	823.674	827.235	1715.17	825.454	1.05518	2.07157e-16	1.39991e-14	CABZ01068367.1	12	45339637	45349849	-	1086	protein_coding	Danio rerio uncharacterized LOC100332446 (LOC100332446), mRNA. [Source:RefSeq mRNA;Acc:NM_001328030]	-	1587	1853	855	812	43.0118	43.9148	20.8451	20.9993
ENSDARG00000101890	320.078	377.503	174.368	161.983	348.791	168.176	1.05297	1.21289e-05	0.000167125	pigr	2	51613453	51634431	-	1836	protein_coding	polymeric immunoglobulin receptor [Source:ZFIN;Acc:ZDB-GENE-060503-327]	V-set	299	404	181	159	4.79335	5.66336	2.6102	2.43222
ENSDARG00000020364	233.368	297.144	159.918	95.7636	265.256	127.841	1.05242	0.000758587	0.00597455	fbp1b	5	35458190	35462126	+	1622	protein_coding	fructose-1,6-bisphosphatase 1b [Source:ZFIN;Acc:ZDB-GENE-021206-11]	-	218	318	166	94	3.95591	5.04593	2.70972	1.62763
ENSDARG00000070857	3560.47	3141.5	1572.21	1662.62	3350.99	1617.41	1.05072	6.76747e-19	6.0727e-17	si:dkey-32e6.6	23	20068880	20100436	-	1775	protein_coding	si:dkey-32e6.6 [Source:ZFIN;Acc:ZDB-GENE-081031-90]	-	3326	3362	1632	1632	55.1524	48.7489	24.3439	25.8226
ENSDARG00000070951	562.01	516.731	239.877	281.178	539.371	260.528	1.05002	1.94419e-07	4.01964e-06	hmga1b	6	54142311	54152983	+	4079	protein_coding	high mobility group AT-hook 1b [Source:ZFIN;Acc:ZDB-GENE-061013-204]	-	525	553	249	276	3.78832	3.48929	1.61627	1.90035
ENSDARG00000019081	2032.87	1840.8	916.156	954.58	1936.83	935.368	1.04988	4.76725e-16	3.07902e-14	zgc:101723	18	951092	968706	-	5650	protein_coding	zgc:101723 [Source:ZFIN;Acc:ZDB-GENE-040927-25]	GFO_IDH_MocA	1899	1970	951	937	9.89276	8.97394	4.45656	4.65768
ENSDARG00000105557	356.475	478.42	188.819	214.959	417.448	201.889	1.04978	1.1692e-05	0.000161511	BX511061.1	7	24840701	24853898	-	4166	unprocessed_pseudogene	-	-	333	512	196	211	2.3527	3.16312	1.24567	1.42246
ENSDARG00000039273	1001.98	892.366	472.047	443.161	947.175	457.604	1.04882	9.71038e-11	3.40174e-09	fbln5	13	33155428	33170733	-	2428	protein_coding	fibulin 5 [Source:ZFIN;Acc:ZDB-GENE-041010-54]	EGF_CA	936	955	490	435	11.3467	10.1232	5.34337	5.03175
ENSDARG00000018478	687.258	598.959	289.008	333.135	643.109	311.072	1.04769	4.39992e-08	1.02376e-06	agxtb	2	22676743	22688651	-	2211	protein_coding	alanine-glyoxylate aminotransferase b [Source:ZFIN;Acc:ZDB-GENE-010302-3]	Aminotran_5	642	641	300	327	8.54648	7.46164	3.59253	4.15372
ENSDARG00000058319	162.715	152.31	73.2154	79.4634	157.512	76.3394	1.04493	0.00186068	0.0126954	cep76	16	10025896	10053049	-	2533	protein_coding	centrosomal protein 76 [Source:ZFIN;Acc:ZDB-GENE-070820-5]	-	152	163	76	78	1.76624	1.65622	0.794413	0.864844
ENSDARG00000097953	124.178	128.015	69.362	52.9756	126.096	61.1688	1.04265	0.00602876	0.0330566	BX469902.1	9	31266192	31271786	-	3142	lincRNA	-	-	116	137	72	52	1.08666	1.12222	0.606728	0.46481
ENSDARG00000022315	702.245	519.534	280.338	312.76	610.89	296.549	1.04181	8.39218e-07	1.5274e-05	atp6v1g1	5	57320113	57325557	+	1069	protein_coding	ATPase H+ transporting V1 subunit G1 [Source:ZFIN;Acc:ZDB-GENE-030131-6965]	-	656	556	291	307	18.062	13.3864	7.20748	8.06564
ENSDARG00000030297	266.554	253.226	120.42	132.439	259.89	126.43	1.03968	0.000100489	0.0010583	sox13	11	37768298	37831776	+	5557	protein_coding	SRY (sex determining region Y)-box 13 [Source:ZFIN;Acc:ZDB-GENE-100519-1]	HMG_box	249	271	125	130	1.31886	1.25515	0.595576	0.657024
ENSDARG00000042032	150.94	113.064	64.5452	64.182	132.002	64.3636	1.03454	0.0058332	0.0322195	pou3f3a	9	6658594	6661666	-	3073	protein_coding	POU class 3 homeobox 3a [Source:ZFIN;Acc:ZDB-GENE-980526-220]	Pou	141	121	67	63	1.35051	1.01342	0.577272	0.57578
ENSDARG00000099616	104.909	117.736	54.9116	53.9944	111.322	54.453	1.0323	0.00896457	0.0451891	FP236734.1	7	72101890	72103391	+	1502	lincRNA	-	-	98	126	57	53	1.92042	2.15907	1.00478	0.991024
ENSDARG00000079985	301.88	313.029	134.871	166.058	307.454	150.464	1.03199	4.82513e-05	0.000562248	nrip2	4	17572495	17629444	-	3685	protein_coding	nuclear receptor interacting protein 2 [Source:ZFIN;Acc:ZDB-GENE-030131-9425]	-	282	335	140	163	2.25244	2.33977	1.00591	1.24231
ENSDARG00000013533	146.658	100.917	54.9116	66.2195	123.787	60.5656	1.03002	0.00951557	0.047222	hoxb4a	3	23710839	23723982	+	1336	protein_coding	homeobox B4a [Source:ZFIN;Acc:ZDB-GENE-990415-105]	Homeobox	137	108	57	65	3.01825	2.08057	1.12963	1.36642
ENSDARG00000018383	2063.92	1583.83	920.973	864.929	1823.87	892.951	1.0296	2.5931e-11	9.83985e-10	frzb	9	44832032	44839148	+	2994	protein_coding	frizzled related protein [Source:ZFIN;Acc:ZDB-GENE-990715-1]	Fz	1928	1695	956	849	18.9538	14.5708	8.45423	7.96405
ENSDARG00000079183	421.775	442.912	235.06	188.471	432.344	211.766	1.02913	3.90323e-06	6.14829e-05	sod3b	1	39990547	39992042	+	1218	protein_coding	superoxide dismutase 3, extracellular b [Source:ZFIN;Acc:ZDB-GENE-030131-8743]	-	394	474	244	185	9.52116	10.016	5.30408	4.26582
ENSDARG00000058498	730.078	664.368	404.612	278.122	697.223	341.367	1.02899	9.64166e-07	1.73748e-05	slc9a3.1	19	10692166	10730488	-	3816	protein_coding	solute carrier family 9, subfamily A (NHE3, cation proton antiporter 3), member 3, tandem duplicate 1 [Source:ZFIN;Acc:ZDB-GENE-060503-545]	Na_H_Exchanger	682	711	420	273	5.26038	4.79542	2.91413	2.00924
ENSDARG00000102506	1056.58	977.397	510.581	485.949	1016.99	498.265	1.02881	3.00349e-11	1.12605e-09	lrp2a	9	48415043	48672254	+	17318	protein_coding	low density lipoprotein receptor-related protein 2a [Source:ZFIN;Acc:ZDB-GENE-050119-2]	Ldl_recept_a	987	1046	530	477	1.67749	1.55453	0.8103	0.773569
ENSDARG00000103937	2356.16	2265.95	1093.41	1172.6	2311.06	1133	1.02845	1.84545e-17	1.45346e-15	ndrg4	25	13332280	13381854	-	6419	protein_coding	NDRG family member 4 [Source:ZFIN;Acc:ZDB-GENE-060512-226]	Ndr	2201	2425	1135	1151	10.0924	9.72321	4.68162	5.03601
ENSDARG00000055373	299.739	432.634	169.552	190.508	366.186	180.03	1.0263	7.46668e-05	0.000820285	sema3fb	11	35447417	35575830	-	6946	protein_coding	sema domain, immunoglobulin domain (Ig), short basic domain, secreted, (semaphorin) 3Fb [Source:ZFIN;Acc:ZDB-GENE-050513-2]	Sema	280	463	176	187	1.18649	1.71558	0.670882	0.75611
ENSDARG00000075297	308.303	254.161	143.541	132.439	281.232	137.99	1.02581	0.000106751	0.00111513	trnt1	6	43222524	43233700	-	5192	protein_coding	tRNA nucleotidyl transferase, CCA-adding, 1 [Source:ZFIN;Acc:ZDB-GENE-040625-176]	-	288	272	149	130	1.63267	1.34834	0.759835	0.703213
ENSDARG00000077573	168.068	260.702	78.9956	132.439	214.385	105.717	1.02323	0.0038021	0.0227824	tmprss13b	5	37888095	37900395	-	1836	protein_coding	transmembrane protease, serine 13b [Source:ZFIN;Acc:ZDB-GENE-090309-2]	Trypsin	157	279	82	130	2.51691	3.91108	1.18252	1.98861
ENSDARG00000002956	316.867	261.636	148.358	136.514	289.251	142.436	1.02063	9.47562e-05	0.00100958	si:dkey-32n7.4	12	4114401	4145033	+	5121	protein_coding	si:dkey-32n7.4 [Source:ZFIN;Acc:ZDB-GENE-110411-175]	VWA	296	280	154	134	1.70129	1.40724	0.796221	0.7349
ENSDARG00000099117	271.906	193.424	105.006	124.289	232.665	114.648	1.01999	0.000791891	0.00621004	si:dkey-33i11.4	16	45228101	45235947	-	875	protein_coding	si:dkey-33i11.4 [Source:ZFIN;Acc:ZDB-GENE-030131-33]	-	254	207	109	122	8.5441	6.08874	3.29827	3.91589
ENSDARG00000067593	183.055	138.293	101.153	57.0507	160.674	79.1018	1.01914	0.0073959	0.0387493	sco1	3	62196672	62203711	+	1178	protein_coding	SCO1 cytochrome c oxidase assembly protein [Source:ZFIN;Acc:ZDB-GENE-140909-1]	-	171	148	105	56	4.27259	3.23357	2.36	1.33512
ENSDARG00000075706	224.804	241.079	131.98	97.8012	232.942	114.891	1.01889	0.000505896	0.00422609	si:ch211-106h4.9	2	31599963	31664615	-	9405	protein_coding	si:ch211-106h4.9 [Source:ZFIN;Acc:ZDB-GENE-070705-17]	-	210	258	137	96	0.657206	0.706035	0.385682	0.286676
ENSDARG00000101967	679.765	603.632	306.349	327.023	641.698	316.686	1.0185	4.07705e-08	9.5485e-07	sult4a1	4	8797197	8810740	+	2801	protein_coding	sulfotransferase family 4A, member 1 [Source:ZFIN;Acc:ZDB-GENE-060421-2705]	Sulfotransfer_1	635	646	318	321	6.6727	5.93587	3.00595	3.21862
ENSDARG00000068856	228.016	249.489	131.017	104.932	238.752	117.975	1.01662	0.000350313	0.00307542	f2rl1.1	21	7934573	7940105	-	1695	protein_coding	coagulation factor II (thrombin) receptor-like 1, tandem duplicate 1 [Source:ZFIN;Acc:ZDB-GENE-061215-140]	7tm_1	213	267	136	103	3.69871	4.05422	2.1244	1.70666
ENSDARG00000006760	218.381	272.849	125.237	118.176	245.615	121.707	1.01398	0.00031903	0.00284528	slc24a3	13	27073901	27210001	+	1839	protein_coding	solute carrier family 24 (sodium/potassium/calcium exchanger), member 3 [Source:ZFIN;Acc:ZDB-GENE-090312-67]	Na_Ca_ex	204	292	130	116	3.26505	4.08664	1.87167	1.77155
ENSDARG00000045014	3262.87	2822.87	1406.51	1612.7	3042.87	1509.6	1.01119	4.36995e-15	2.5179e-13	tuba2	11	3336524	3343463	-	3688	protein_coding	tubulin, alpha 2 [Source:ZFIN;Acc:ZDB-GENE-040426-1970]	Tubulin	3048	3021	1460	1583	24.3257	21.0826	10.4817	12.055
ENSDARG00000092240	492.428	505.518	243.73	251.634	498.973	247.682	1.01074	4.07368e-07	7.87231e-06	si:ch211-243a20.3	1	45351890	45366422	+	981	protein_coding	si:ch211-243a20.3 [Source:ZFIN;Acc:ZDB-GENE-061207-28]	-	460	541	253	247	13.8016	14.1936	6.82841	7.07141
ENSDARG00000060601	229.086	186.883	96.3361	110.026	207.984	103.181	1.0107	0.00084692	0.00656204	rgs7bpa	8	31901318	31919624	-	2526	protein_coding	regulator of G protein signaling 7 binding protein a [Source:ZFIN;Acc:ZDB-GENE-060929-380]	-	214	200	100	108	2.49357	2.0378	1.04818	1.20079
ENSDARG00000077314	291.175	327.979	185.929	121.233	309.577	153.581	1.01042	0.000279916	0.00254834	mblac1	7	26459360	26467404	-	2288	protein_coding	metallo-beta-lactamase domain containing 1 [Source:ZFIN;Acc:ZDB-GENE-111102-2]	-	272	351	193	119	3.49908	3.94836	2.23341	1.46073
ENSDARG00000076500	532.037	398.995	236.023	226.165	465.516	231.094	1.00892	8.27381e-06	0.000119259	chgb	20	45741566	45752016	+	2778	protein_coding	chromogranin B [Source:ZFIN;Acc:ZDB-GENE-070705-268]	-	497	427	245	222	5.26581	3.95604	2.33508	2.24439
ENSDARG00000044975	3827.02	3447.05	1826.53	1787.93	3637.04	1807.23	1.00871	3.63306e-19	3.31441e-17	krt94	11	11468566	11471857	-	1891	protein_coding	keratin 94 [Source:ZFIN;Acc:ZDB-GENE-061027-116]	Filament	3575	3689	1896	1755	55.6449	50.2091	26.547	26.0654
ENSDARG00000036993	524.543	792.383	365.114	290.347	658.463	327.731	1.00729	1.23461e-05	0.000169691	erbb3b	23	25232411	25287666	+	4645	protein_coding	erb-b2 receptor tyrosine kinase 3b [Source:ZFIN;Acc:ZDB-GENE-050107-1]	Pkinase_Tyr	490	848	379	285	3.10493	4.69867	2.16034	1.72321
ENSDARG00000022560	487.076	399.929	209.049	232.278	443.502	220.664	1.00651	5.57977e-06	8.43709e-05	clcnk	23	24272421	24291927	+	2352	protein_coding	chloride channel K [Source:ZFIN;Acc:ZDB-GENE-040426-1379]	Voltage_CLC	455	428	217	228	5.69397	4.68351	2.44281	2.72255
ENSDARG00000105188	3550.84	2349.12	1456.6	1479.24	2949.98	1467.92	1.00644	2.45584e-09	6.93814e-08	vimr2	14	33788835	33824329	-	4699	protein_coding	vimentin-related 2 [Source:ZFIN;Acc:ZDB-GENE-160113-76]	Filament	3317	2514	1512	1452	20.7769	13.7697	8.5195	8.6784
ENSDARG00000073747	1173.26	1196.98	611.734	568.469	1185.12	590.102	1.00585	4.8651e-12	2.01364e-10	si:dkey-1j5.4	20	36380266	36393555	-	1769	protein_coding	si:dkey-1j5.4 [Source:ZFIN;Acc:ZDB-GENE-130603-91]	-	1096	1281	635	558	18.2357	18.6375	9.50416	8.859
ENSDARG00000087198	463.525	463.469	205.196	256.728	463.497	230.962	1.00572	3.33308e-06	5.31521e-05	cthrc1a	19	12915498	12927089	+	1262	protein_coding	collagen triple helix repeat containing 1a [Source:ZFIN;Acc:ZDB-GENE-040808-22]	Collagen	433	496	213	252	10.0988	10.1155	4.46877	5.60815
ENSDARG00000102725	139.164	170.063	84.7758	69.2758	154.614	77.0258	1.00556	0.00377492	0.0226494	CABZ01081909.1	KN150115.1	10553	18336	-	1008	protein_coding	-	-	130	182	88	68	3.79598	4.64704	2.31148	1.89464
ENSDARG00000095300	198.042	177.539	75.1422	112.064	187.79	93.603	1.00545	0.00234336	0.0153479	mxra7	12	20667301	20677982	+	2450	protein_coding	matrix-remodelling associated 7 [Source:ZFIN;Acc:ZDB-GENE-041014-95]	-	185	190	78	110	2.22252	1.99596	0.84294	1.26097
ENSDARG00000002635	357.546	257.898	163.771	142.627	307.722	153.199	1.00419	0.000205445	0.00196001	zgc:85722	17	15309432	15382704	-	3814	protein_coding	zgc:85722 [Source:ZFIN;Acc:ZDB-GENE-040516-7]	-	334	276	170	140	2.57755	1.86249	1.18015	1.03092
ENSDARG00000097576	169.138	157.916	81.8857	81.501	163.527	81.6933	1.00079	0.00223221	0.0147544	zgc:92912	16	9779680	9786259	+	1060	protein_coding	zgc:92912 [Source:ZFIN;Acc:ZDB-GENE-040718-265]	-	158	169	85	80	4.38725	4.10342	2.12315	2.11964
ENSDARG00000101009	84.5692	103.72	191.709	185.415	94.1446	188.562	-1.00003	0.00134745	0.00972806	cited4b	16	35535171	35537491	+	1819	protein_coding	Cbp/p300-interacting transactivator, with Glu/Asp-rich carboxy-terminal domain, 4b [Source:ZFIN;Acc:ZDB-GENE-030425-5]	-	79	111	199	182	1.27831	1.57056	2.8966	2.81007
ENSDARG00000011870	684.047	698.942	1252.37	1514.9	691.494	1383.63	-1.00028	3.63912e-11	1.35508e-09	sp8a	19	2315208	2318391	-	2445	protein_coding	sp8 transcription factor a [Source:ZFIN;Acc:ZDB-GENE-030131-9849]	zf-C2H2	639	748	1300	1487	7.69242	7.87387	14.0777	17.0809
ENSDARG00000054300	194.83	185.014	299.605	460.48	189.922	380.043	-1.00044	0.000142338	0.00143221	dhrs1	2	38261748	38269675	+	1339	protein_coding	dehydrogenase/reductase (SDR family) member 1 [Source:ZFIN;Acc:ZDB-GENE-030616-591]	adh_short	182	198	311	452	4.00066	3.80583	6.14961	9.48061
ENSDARG00000110804	52.4543	71.9499	123.31	126.326	62.2021	124.818	-1.00143	0.00888242	0.0449118	PARD3 (1 of many)	24	1845689	1985007	-	1593	protein_coding	par-3 family cell polarity regulator [Source:HGNC Symbol;Acc:HGNC:16051]	PDZ	49	77	128	124	0.90536	1.24406	2.12746	2.18617
ENSDARG00000056979	126.319	178.473	277.448	334.154	152.396	305.801	-1.00149	0.000246526	0.00229494	lhx9	22	23238790	23253481	-	6522	protein_coding	LIM homeobox 9 [Source:ZFIN;Acc:ZDB-GENE-050417-210]	LIM	118	191	288	328	0.532527	0.753734	1.16918	1.41244
ENSDARG00000052527	81.3577	115.867	202.306	193.565	98.6125	197.935	-1.00188	0.00158972	0.0111668	mul1b	23	37287542	37291840	-	2132	protein_coding	mitochondrial E3 ubiquitin protein ligase 1b [Source:ZFIN;Acc:ZDB-GENE-050208-236]	-	76	124	210	190	1.04922	1.49692	2.60795	2.50291
ENSDARG00000104758	113.473	83.1629	185.929	207.827	98.3177	196.878	-1.00459	0.00147045	0.0104531	zgc:194981	11	42730639	42732440	+	504	protein_coding	zgc:194981 [Source:ZFIN;Acc:ZDB-GENE-081022-170]	-	106	89	193	204	6.19036	4.5449	10.139	11.3678
ENSDARG00000060847	105.979	116.802	245.657	201.715	111.39	223.686	-1.00531	0.000571677	0.004695	setd1ba	10	41986685	42022566	+	8180	protein_coding	SET domain containing 1B, a [Source:ZFIN;Acc:ZDB-GENE-050309-289]	SET	99	125	255	198	0.356224	0.393298	0.825382	0.679814
ENSDARG00000010758	173.42	214.915	341.993	439.086	194.168	390.54	-1.0059	3.84887e-05	0.000458992	capn12	18	36664654	36729637	+	2677	protein_coding	calpain 12 [Source:ZFIN;Acc:ZDB-GENE-050419-245]	Peptidase_C2	162	230	355	431	1.78118	2.21129	3.51114	4.52176
ENSDARG00000062361	381.097	387.782	781.286	764.072	384.439	772.679	-1.007	1.86368e-09	5.3691e-08	PAXBP1	10	24422017	24442546	+	3839	protein_coding	zgc:158234 [Source:ZFIN;Acc:ZDB-GENE-070112-2352]	-	356	415	811	750	2.72943	2.78224	5.59333	5.48683
ENSDARG00000002991	361.828	292.472	589.577	725.359	327.15	657.468	-1.0082	5.72686e-07	1.07538e-05	cep135	20	25711718	25735315	+	4259	protein_coding	centrosomal protein 135 [Source:ZFIN;Acc:ZDB-GENE-041210-325]	-	338	313	612	712	2.33588	1.89148	3.80462	4.69516
ENSDARG00000091727	107.05	141.097	245.657	254.691	124.073	250.174	-1.00897	0.000339848	0.00300021	RNF14 (1 of many)	15	3808996	3816757	+	1311	protein_coding	ring finger protein 14 [Source:HGNC Symbol;Acc:HGNC:10058]	RWD	100	151	255	250	2.24511	2.96442	5.14998	5.35569
ENSDARG00000116806	4682.35	5100.97	9971.75	9727.14	4891.66	9849.45	-1.00954	2.61229e-25	3.91755e-23	CU693479.1	3	59851537	59862797	+	5258	protein_coding	-	-	4374	5459	10351	9548	24.4849	26.7213	52.123	51
ENSDARG00000044073	362.898	350.405	626.185	811.953	356.652	719.069	-1.01146	1.56089e-07	3.29562e-06	fuca2	17	6438051	6451801	-	1983	protein_coding	alpha-L-fucosidase 2 [Source:ZFIN;Acc:ZDB-GENE-040822-39]	Alpha_L_fucos	339	375	650	797	5.03174	4.86714	8.67878	11.2879
ENSDARG00000015662	510.627	427.962	992.262	898.548	469.294	945.405	-1.0119	1.83961e-09	5.30675e-08	pla2g12b	13	4671698	4683595	+	2292	protein_coding	phospholipase A2, group XIIB [Source:ZFIN;Acc:ZDB-GENE-040426-2771]	-	477	458	1030	882	6.12554	5.143	11.8985	10.8077
ENSDARG00000054184	56.7363	59.8025	125.237	110.026	58.2694	117.632	-1.01321	0.0084754	0.0433775	btr06	7	16205609	16214891	-	3045	protein_coding	bloodthirsty-related gene family, member 6 [Source:ZFIN;Acc:ZDB-GENE-080516-2]	SPRY	53	64	130	108	0.512306	0.540951	1.13038	0.996127
ENSDARG00000059993	414.282	507.387	880.512	984.124	460.834	932.318	-1.01496	4.12576e-09	1.13058e-07	trpm4a	3	32492467	32518947	+	4659	protein_coding	transient receptor potential cation channel, subfamily M, member 4a [Source:ZFIN;Acc:ZDB-GENE-090302-3]	Ion_trans	387	543	914	966	2.44489	2.99966	5.19423	5.82321
ENSDARG00000105039	284.752	416.749	686.876	733.509	350.75	710.193	-1.01525	1.13769e-06	2.01861e-05	phka1b	21	30600337	30648132	-	4914	protein_coding	phosphorylase kinase, alpha 1b (muscle) [Source:ZFIN;Acc:ZDB-GENE-091204-81]	-	266	446	713	720	1.59326	2.33596	3.84169	4.11506
ENSDARG00000110186	299.739	327.045	695.547	572.544	313.392	634.045	-1.01625	1.67182e-07	3.52304e-06	CDCP1	19	2835240	2853746	+	3088	protein_coding	CUB domain containing protein 1 [Source:HGNC Symbol;Acc:HGNC:24357]	-	280	350	722	562	2.66883	2.91713	6.19053	5.11137
ENSDARG00000056209	4154.6	3803.07	8070.08	8028.86	3978.83	8049.47	-1.01678	8.4405e-25	1.21582e-22	myoz1a	13	22264914	22278415	+	1919	protein_coding	myozenin 1a [Source:ZFIN;Acc:ZDB-GENE-040426-1875]	-	3881	4070	8377	7881	59.5264	54.5864	115.58	115.341
ENSDARG00000008287	129.53	129.884	281.301	243.484	129.707	262.393	-1.01678	0.000147043	0.00146942	fam114a1	1	18575747	18592068	-	2273	protein_coding	family with sequence similarity 114, member A1 [Source:ZFIN;Acc:ZDB-GENE-070410-52]	-	121	139	292	239	1.56685	1.57391	3.40135	2.95309
ENSDARG00000088036	63.1593	64.4746	131.017	127.345	63.8169	129.181	-1.01723	0.00543086	0.0304652	si:dkey-106g10.7	7	17760713	17780048	-	8270	protein_coding	si:dkey-106g10.7 [Source:ZFIN;Acc:ZDB-GENE-160728-46]	-	59	69	136	125	0.209985	0.214738	0.435413	0.424505
ENSDARG00000020417	118.825	155.113	259.144	296.46	136.969	277.802	-1.0174	0.000190135	0.00183635	emx3	14	26363537	26377044	-	2987	protein_coding	empty spiracles homeobox 3 [Source:ZFIN;Acc:ZDB-GENE-990415-53]	Homeobox	111	166	269	291	1.09378	1.43034	2.38443	2.73613
ENSDARG00000054312	257.99	284.996	525.995	574.582	271.493	550.288	-1.01817	2.13128e-07	4.34897e-06	slc38a6	13	31687973	31707870	+	2039	protein_coding	solute carrier family 38, member 6 [Source:ZFIN;Acc:ZDB-GENE-050522-51]	Aa_trans	241	305	546	564	3.47889	3.84989	7.08995	7.76855
ENSDARG00000035652	1098.33	1496.93	2289.91	2974.79	1297.63	2632.35	-1.01948	1.40535e-09	4.15252e-08	sat1a.1	5	4332220	4342866	+	1758	protein_coding	spermidine/spermine N1-acetyltransferase 1a, duplicate 1 [Source:ZFIN;Acc:ZDB-GENE-050913-41]	Acetyltransf_1	1026	1602	2377	2920	17.1779	23.4536	35.7996	46.649
ENSDARG00000101696	152.01	131.752	255.291	319.891	141.881	287.591	-1.02022	0.000135166	0.00136696	zgc:158316	9	51891	59189	+	1302	protein_coding	zgc:158316 [Source:ZFIN;Acc:ZDB-GENE-061215-98]	-	142	141	265	314	3.2101	2.78723	5.38893	6.77325
ENSDARG00000042112	399.295	430.765	803.443	881.229	415.03	842.336	-1.02037	1.00428e-09	3.03291e-08	dio1	8	18039570	18042089	-	1474	protein_coding	iodothyronine deiodinase 1 [Source:ZFIN;Acc:ZDB-GENE-030328-41]	-	373	461	834	865	7.44821	8.0495	14.9809	16.4815
ENSDARG00000077300	93.1332	153.244	223.5	278.122	123.189	250.811	-1.02143	0.00114028	0.00844599	usp42	12	17570675	17593030	-	5061	protein_coding	ubiquitin specific peptidase 42 [Source:ZFIN;Acc:ZDB-GENE-030131-5739]	UCH	87	164	232	273	0.505969	0.834013	1.21372	1.51497
ENSDARG00000079560	237.65	355.077	553.933	652.008	296.364	602.97	-1.02192	6.23837e-06	9.30443e-05	ptprh	24	7782313	7816871	+	3733	protein_coding	protein tyrosine phosphatase, receptor type, h [Source:ZFIN;Acc:ZDB-GENE-091118-90]	fn3	222	380	575	640	1.75039	2.61994	4.07829	4.81504
ENSDARG00000026736	269.765	267.242	557.786	532.813	268.504	545.299	-1.0223	1.16613e-07	2.518e-06	il11ra	10	13305610	13396720	-	2887	protein_coding	interleukin 11 receptor, alpha [Source:ZFIN;Acc:ZDB-GENE-030131-5942]	-	252	286	579	523	2.56918	2.54967	5.31006	5.08784
ENSDARG00000042859	143.446	161.654	303.459	316.835	152.55	310.147	-1.02234	3.68135e-05	0.000441177	slc5a6a	20	36646761	36671660	-	2320	protein_coding	solute carrier family 5 (sodium/multivitamin and iodide cotransporter), member 6a [Source:ZFIN;Acc:ZDB-GENE-041001-177]	-	134	173	315	311	1.70003	1.91921	3.59493	3.76488
ENSDARG00000014232	401.436	471.879	816.93	959.674	436.658	888.302	-1.02312	5.53694e-09	1.48568e-07	si:dkey-121j17.5	20	616114	641511	-	2373	protein_coding	si:dkey-121j17.5 [Source:ZFIN;Acc:ZDB-GENE-030131-4745]	Pkinase	375	505	848	942	4.6513	5.4772	9.46163	11.1489
ENSDARG00000112637	92.0627	120.539	219.646	213.94	106.301	216.793	-1.0255	0.000599327	0.0048818	ANOS1	9	55154414	55217191	+	2392	protein_coding	anosmin 1 [Source:HGNC Symbol;Acc:HGNC:6211]	fn3	86	129	228	210	1.05823	1.38801	2.52372	2.46568
ENSDARG00000043281	238.721	285.931	532.739	536.888	262.326	534.813	-1.02602	3.63505e-07	7.13807e-06	stap2b	8	18650414	18667693	-	1861	protein_coding	signal transducing adaptor family member 2b [Source:ZFIN;Acc:ZDB-GENE-040426-2540]	-	223	306	553	527	3.52695	4.23195	7.86768	7.95321
ENSDARG00000009209	253.708	198.096	485.534	436.03	225.902	460.782	-1.03075	3.60925e-06	5.72227e-05	slc9a6a	14	31618982	31647900	+	8262	protein_coding	solute carrier family 9, subfamily A (NHE6, cation proton antiporter 6), member 6a [Source:ZFIN;Acc:ZDB-GENE-070424-104]	Na_H_Exchanger	237	212	504	428	0.844314	0.660413	1.61515	1.45491
ENSDARG00000101892	131.671	237.341	429.659	326.004	184.506	377.831	-1.03091	0.000460576	0.00389055	ino80e	16	10422836	10428899	+	3569	protein_coding	INO80 complex subunit E [Source:ZFIN;Acc:ZDB-GENE-040426-1818]	-	123	254	446	320	1.01438	1.83169	3.30869	2.51815
ENSDARG00000026787	49.2428	66.3434	116.567	120.214	57.7931	118.39	-1.03131	0.00853493	0.0436047	aqp7	21	12010505	12021593	+	2461	protein_coding	aquaporin 7 [Source:ZFIN;Acc:ZDB-GENE-030131-6461]	-	46	71	121	118	0.550157	0.742527	1.30179	1.34663
ENSDARG00000023820	751.488	812.006	1567.39	1632.06	781.747	1599.72	-1.03244	1.25494e-14	6.8181e-13	faxdc2	21	45839917	45852112	+	2177	protein_coding	fatty acid hydroxylase domain containing 2 [Source:ZFIN;Acc:ZDB-GENE-040426-2907]	-	702	869	1627	1602	9.49116	10.2737	19.7878	20.6672
ENSDARG00000100955	208.747	242.948	441.219	483.912	225.847	462.566	-1.03269	1.32817e-06	2.31532e-05	stk24a	9	1162216	1176354	+	1488	protein_coding	serine/threonine kinase 24a (STE20 homolog, yeast) [Source:ZFIN;Acc:ZDB-GENE-070424-52]	Pkinase	195	260	458	475	3.8572	4.49713	8.14949	8.96539
ENSDARG00000102474	681.906	755.007	1432.52	1509.81	718.456	1471.16	-1.03319	1.22908e-13	6.04737e-12	dusp16	4	107287	119689	-	4927	protein_coding	dual specificity phosphatase 16 [Source:ZFIN;Acc:ZDB-GENE-040426-2360]	DSPc	637	808	1487	1482	3.80538	4.22079	7.99091	8.44781
ENSDARG00000020984	1722.43	1830.52	3677.15	3604.38	1776.47	3640.76	-1.03496	1.4763e-21	1.72853e-19	slc16a10	20	122123	147578	-	2389	protein_coding	solute carrier family 16 (aromatic amino acid transporter), member 10 [Source:ZFIN;Acc:ZDB-GENE-040724-214]	MFS_1	1609	1959	3817	3538	19.8235	21.1049	42.3033	41.593
ENSDARG00000102765	739.713	668.106	1510.55	1376.35	703.909	1443.45	-1.03689	3.61324e-13	1.69405e-11	lonp1	22	3160447	3182965	-	4114	protein_coding	lon peptidase 1, mitochondrial [Source:ZFIN;Acc:ZDB-GENE-030131-4006]	AAA	691	715	1568	1351	4.94373	4.47308	10.0914	9.22294
ENSDARG00000021573	78.1462	73.8187	120.42	191.527	75.9825	155.974	-1.03715	0.00486453	0.0278527	slc16a7	23	9867483	9889330	+	2019	protein_coding	solute carrier family 16, member 7 (monocarboxylic acid transporter 2) [Source:ZFIN;Acc:ZDB-GENE-051113-248]	MFS_1	73	79	125	188	1.06421	1.00706	1.63924	2.61517
ENSDARG00000040606	585.561	775.564	1548.12	1247.98	680.563	1398.05	-1.03751	3.38029e-09	9.39231e-08	tfap2c	6	56141852	56179707	+	5091	protein_coding	transcription factor AP-2 gamma (activating enhancer binding protein 2 gamma) [Source:ZFIN;Acc:ZDB-GENE-041212-61]	TF_AP-2	547	830	1607	1225	3.16246	4.19605	8.35758	6.75789
ENSDARG00000005518	224.804	257.898	498.058	495.118	241.351	496.588	-1.03961	3.7688e-07	7.36766e-06	slc5a9	8	15254564	15268932	+	2201	protein_coding	solute carrier family 5 (sodium/sugar cotransporter), member 9 [Source:ZFIN;Acc:ZDB-GENE-080513-3]	-	210	276	517	486	2.80828	3.22741	6.21926	6.20147
ENSDARG00000103850	62.0888	91.5726	159.918	156.889	76.8307	158.404	-1.04002	0.00317194	0.0197244	si:cabz01021426.2	4	73335421	73372362	-	4155	protein_coding	si:cabz01021426.2 [Source:ZFIN;Acc:ZDB-GENE-161017-90]	zf-C2H2	58	98	166	154	0.410864	0.607044	1.0578	1.04095
ENSDARG00000058830	226.945	241.079	473.01	490.025	234.012	481.517	-1.04033	3.42351e-07	6.75903e-06	zdhhc3b	19	1003332	1013213	+	3724	protein_coding	zinc finger, DHHC-type containing 3b [Source:ZFIN;Acc:ZDB-GENE-061110-19]	-	212	258	491	481	1.67559	1.7831	3.49092	3.62755
ENSDARG00000041339	452.82	570.927	1127.13	983.105	511.873	1055.12	-1.04224	1.49081e-09	4.38726e-08	zgc:92380	9	48007081	48039964	+	1712	protein_coding	zgc:92380 [Source:ZFIN;Acc:ZDB-GENE-040801-221]	Filament	423	611	1170	965	7.27239	9.1855	18.0946	15.8308
ENSDARG00000057531	80.2872	64.4746	136.797	160.964	72.3809	148.881	-1.04243	0.00318101	0.0197595	pgap3	12	9449665	9468618	-	1522	protein_coding	post-GPI attachment to proteins 3 [Source:ZFIN;Acc:ZDB-GENE-080204-27]	-	75	69	142	158	1.4504	1.16681	2.47025	2.91555
ENSDARG00000038683	94.2037	122.408	255.291	191.527	108.306	223.409	-1.04273	0.000754395	0.00594582	MFAP4 (1 of many)	1	59075795	59104145	-	2171	protein_coding	si:zfos-2330d3.1 [Source:ZFIN;Acc:ZDB-GENE-110408-35]	Fibrinogen_C	88	131	265	188	1.19306	1.55302	3.23187	2.43207
ENSDARG00000061414	99.5561	85.0317	197.489	182.358	92.2939	189.924	-1.043	0.000798368	0.00624965	slx4	22	26798853	26844334	+	5597	protein_coding	SLX4 structure-specific endonuclease subunit homolog (S. cerevisiae) [Source:ZFIN;Acc:ZDB-GENE-050208-359]	BTB	93	91	205	179	0.489067	0.418457	0.969765	0.898206
ENSDARG00000061196	196.971	352.274	535.629	599.032	274.623	567.33	-1.0435	4.51956e-05	0.000529175	emilin2a	2	30986996	31018096	-	3304	protein_coding	elastin microfibril interfacer 2a [Source:ZFIN;Acc:ZDB-GENE-060503-247]	-	184	377	556	588	1.63915	2.93675	4.45556	4.99822
ENSDARG00000109996	653.003	585.878	1322.69	1229.65	619.44	1276.17	-1.04369	1.22769e-12	5.39762e-11	CABZ01101996.1	19	43123331	43134843	+	243	protein_coding	-	-	610	627	1373	1207	73.8864	66.4089	149.6	139.502
ENSDARG00000015293	47.1018	57.9337	105.97	111.045	52.5178	108.507	-1.04449	0.00968903	0.0478874	fam110a	8	49206057	49207319	-	921	protein_coding	family with sequence similarity 110, member A [Source:ZFIN;Acc:ZDB-GENE-030521-6]	-	44	62	110	109	1.40616	1.7326	3.16228	3.32388
ENSDARG00000028336	1318.85	1239.03	2345.78	2929.96	1278.94	2637.87	-1.04449	3.74294e-14	1.92728e-12	dhdhl	18	970246	977075	-	1247	protein_coding	dihydrodiol dehydrogenase (dimeric), like [Source:ZFIN;Acc:ZDB-GENE-040426-2180]	GFO_IDH_MocA	1232	1326	2435	2876	29.0794	27.368	51.7012	64.774
ENSDARG00000093629	198.042	236.407	502.875	394.261	217.224	448.568	-1.04509	5.72151e-06	8.6098e-05	si:ch211-106h4.4	2	31597841	31607080	+	4345	protein_coding	si:ch211-106h4.4 [Source:ZFIN;Acc:ZDB-GENE-070705-14]	-	185	253	522	387	1.25321	1.49864	3.18089	2.50149
ENSDARG00000069192	86.7102	193.424	304.422	276.085	140.067	290.253	-1.0467	0.00209821	0.0140403	zgc:163030	13	33669936	33671694	-	826	protein_coding	zgc:163030 [Source:ZFIN;Acc:ZDB-GENE-060810-77]	-	81	207	316	271	2.88633	6.44994	10.1292	9.21441
ENSDARG00000054154	204.465	116.802	373.784	288.31	160.633	331.047	-1.04737	0.00047816	0.00402821	bms1	12	29240124	29270362	+	4662	protein_coding	BMS1 ribosome biogenesis factor [Source:ZFIN;Acc:ZDB-GENE-060720-2]	-	191	125	388	283	1.20587	0.690086	2.20357	1.70487
ENSDARG00000099032	375.744	336.389	785.139	685.627	356.067	735.383	-1.04752	6.66429e-09	1.76652e-07	FO818704.1	7	69841017	69846879	+	369	protein_coding	-	-	351	360	815	673	27.9976	25.1097	58.4789	51.2232
ENSDARG00000031929	452.82	524.206	959.508	1065.63	488.513	1012.57	-1.05028	1.17248e-10	4.0878e-09	stard14	14	33270387	33278084	-	2386	protein_coding	START domain containing 14 [Source:ZFIN;Acc:ZDB-GENE-040426-963]	START	423	561	996	1046	5.21808	6.05143	11.0524	12.3123
ENSDARG00000109481	53.5248	68.2122	145.468	106.97	60.8685	126.219	-1.05037	0.00731684	0.038381	CABZ01092745.1	13	52071971	52105015	+	165	protein_coding	-	-	50	73	151	105	8.91922	11.3869	24.2304	17.8724
ENSDARG00000087793	236.58	190.62	471.084	412.599	213.6	441.841	-1.05082	2.97302e-06	4.78283e-05	si:dkey-54n8.2	15	25576809	25584888	-	2531	protein_coding	si:dkey-54n8.2 [Source:ZFIN;Acc:ZDB-GENE-131121-569]	-	221	204	489	405	2.57005	2.07445	5.11546	4.49408
ENSDARG00000053774	145.587	128.949	320.799	247.559	137.268	284.179	-1.0515	0.000109343	0.00113732	alpi.2	22	38778649	38794610	+	4363	protein_coding	alkaline phosphatase, intestinal, tandem duplicate 2 [Source:ZFIN;Acc:ZDB-GENE-050626-142]	-	136	138	333	243	0.917476	0.814065	2.02082	1.56423
ENSDARG00000100296	120.966	65.409	197.489	187.452	93.1875	192.471	-1.05155	0.00293171	0.0185359	pja2	5	57210237	57234118	+	2413	protein_coding	praja ring finger ubiquitin ligase 2 [Source:ZFIN;Acc:ZDB-GENE-060526-337]	-	113	70	205	184	1.37836	0.746631	2.24939	2.1416
ENSDARG00000007912	145.587	245.751	401.722	411.58	195.669	406.651	-1.05174	8.03038e-05	0.000872148	si:ch211-196i2.1	21	14253404	14310159	-	6041	protein_coding	si:ch211-196i2.1 [Source:ZFIN;Acc:ZDB-GENE-091204-150]	Collagen	136	263	417	404	0.66263	1.1205	1.82766	1.87824
ENSDARG00000099483	93.1332	113.064	174.368	254.691	103.099	214.529	-1.05464	0.00100293	0.00757213	vdra	23	45822935	45825632	+	822	protein_coding	vitamin D receptor a [Source:ZFIN;Acc:ZDB-GENE-000210-31]	Hormone_recep	87	121	181	250	3.11522	3.7886	5.83008	8.54174
ENSDARG00000073893	114.543	142.031	243.73	290.347	128.287	267.039	-1.05519	0.000136558	0.00138039	dnase2	16	45337663	45357518	+	3476	protein_coding	deoxyribonuclease II, lysosomal [Source:ZFIN;Acc:ZDB-GENE-010724-16]	-	107	152	253	285	0.906035	1.12546	1.92712	2.30273
ENSDARG00000104538	248.355	314.898	612.698	559.3	281.626	585.999	-1.0553	2.08727e-07	4.27111e-06	tmem184a	3	42923275	42957609	+	2965	protein_coding	transmembrane protein 184a [Source:ZFIN;Acc:ZDB-GENE-040426-2925]	-	232	337	636	549	2.30305	2.9253	5.67937	5.20027
ENSDARG00000098477	79.2167	87.8349	172.442	175.227	83.5258	173.834	-1.05623	0.00101146	0.00761816	tec	23	44124138	44146690	+	1866	protein_coding	tec protein tyrosine kinase [Source:ZFIN;Acc:ZDB-GENE-030131-7499]	Pkinase_Tyr	74	94	179	172	1.16724	1.29653	2.53986	2.58878
ENSDARG00000074842	503.133	530.747	979.738	1174.63	516.94	1077.19	-1.05854	6.76883e-11	2.42559e-09	snx8a	3	42090418	42120172	+	2753	protein_coding	sorting nexin 8a [Source:ZFIN;Acc:ZDB-GENE-031202-1]	PX	470	568	1017	1153	5.02496	5.31016	9.78099	11.7625
ENSDARG00000069415	6910.05	8089.22	15435.9	15815.3	7499.64	15625.6	-1.05882	3.55763e-24	4.99322e-22	col17a1a	1	49568335	49605854	+	4745	protein_coding	collagen, type XVII, alpha 1a [Source:ZFIN;Acc:ZDB-GENE-090313-107]	Collagen	6455	8657	16023	15524	40.0406	46.9566	89.4078	91.8852
ENSDARG00000025375	175.561	139.228	342.957	311.741	157.395	327.349	-1.05889	2.61696e-05	0.000326673	idh1	9	28103735	28129476	+	4322	protein_coding	isocitrate dehydrogenase 1 (NADP+), soluble [Source:ZFIN;Acc:ZDB-GENE-031006-1]	-	164	149	356	306	1.11686	0.887292	2.18089	1.98845
ENSDARG00000063309	669.06	657.828	1381.46	1383.48	663.444	1382.47	-1.05933	1.1611e-14	6.32394e-13	tjp2a	10	15815865	15879569	-	5085	protein_coding	tight junction protein 2a (zona occludens 2) [Source:ZFIN;Acc:ZDB-GENE-070925-2]	PDZ	625	704	1434	1358	3.61768	3.56326	7.46666	7.50045
ENSDARG00000102050	185.196	232.669	366.077	506.325	208.932	436.201	-1.05968	1.69085e-05	0.00022437	LO017850.1	23	45937468	45955177	-	2452	protein_coding	-	-	173	249	380	497	2.07667	2.61363	4.10328	5.69265
ENSDARG00000056108	216.24	178.473	528.885	294.422	197.357	411.654	-1.0625	0.00022325	0.00210601	ndufa4	12	9880493	9884326	+	1403	protein_coding	NADH dehydrogenase (ubiquinone) 1 alpha subcomplex, 4 [Source:ZFIN;Acc:ZDB-GENE-040426-1962]	-	202	191	549	289	4.23774	3.50381	10.3605	5.7852
ENSDARG00000079011	1462.3	1956.66	3671.37	3476.02	1709.48	3573.69	-1.06305	7.4648e-14	3.75728e-12	col17a1b	13	24750078	24779692	+	5454	protein_coding	collagen, type XVII, alpha 1b [Source:ZFIN;Acc:ZDB-GENE-030131-7145]	Collagen	1366	2094	3811	3412	7.37185	9.88159	18.5009	17.57
ENSDARG00000035438	12326.8	16283.1	31766.8	28028.2	14304.9	29897.5	-1.06341	2.09783e-16	1.41329e-14	myhc4	5	32221755	32233862	+	5983	protein_coding	myosin heavy chain 4 [Source:ZFIN;Acc:ZDB-GENE-030131-6206]	Myosin_head	11515	17426	32975	27512	56.6482	74.9625	145.926	129.146
ENSDARG00000104256	472.089	623.254	1200.35	1092.11	547.671	1146.23	-1.06396	6.45622e-10	2.01366e-08	bco1	7	65261354	65290474	+	2183	protein_coding	beta-carotene oxygenase 1 [Source:ZFIN;Acc:ZDB-GENE-010508-1]	RPE65	441	667	1246	1072	5.94601	7.86389	15.1124	13.7918
ENSDARG00000101290	64.2298	83.1629	171.478	137.533	73.6963	154.506	-1.06583	0.00264092	0.0170018	si:dkey-203a12.8	14	15597049	15597806	+	410	protein_coding	si:dkey-203a12.8 [Source:ZFIN;Acc:ZDB-GENE-141216-182]	-	60	89	178	135	4.30733	5.58691	11.4949	9.24758
ENSDARG00000030687	990.209	1191.38	2445.97	2124.12	1090.79	2285.05	-1.06613	3.73832e-14	1.92728e-12	phka2	11	33870357	33919309	-	7231	protein_coding	phosphorylase kinase, alpha 2 (liver) [Source:ZFIN;Acc:ZDB-GENE-130422-1]	-	925	1275	2539	2085	3.76517	4.53813	9.29677	8.09815
ENSDARG00000102414	2083.19	2191.2	4348.61	4607.86	2137.19	4478.24	-1.06695	7.3163e-24	1.02032e-21	myhz1.1	22	268352	278328	-	4893	protein_coding	myosin, heavy polypeptide 1.1, skeletal muscle [Source:ZFIN;Acc:ZDB-GENE-000322-5]	Myosin_head	1946	2345	4514	4523	11.706	12.3348	24.4261	25.9615
ENSDARG00000031848	107.05	118.671	243.73	230.24	112.86	236.985	-1.06928	0.000134562	0.0013621	pparg	11	609516	669558	-	1581	protein_coding	peroxisome proliferator-activated receptor gamma [Source:ZFIN;Acc:ZDB-GENE-990415-213]	Hormone_recep	100	127	253	226	1.8617	2.06746	4.23698	4.01472
ENSDARG00000026376	811.436	797.99	1571.24	1807.28	804.713	1689.26	-1.06977	9.05093e-15	5.05536e-13	aco1	7	71463106	71486162	-	2884	protein_coding	aconitase 1, soluble [Source:ZFIN;Acc:ZDB-GENE-031118-76]	Aconitase	758	854	1631	1774	7.73597	7.62128	14.9736	17.2757
ENSDARG00000068586	1478.36	1776.32	3276.39	3570.76	1627.34	3423.58	-1.07223	3.17084e-17	2.38576e-15	CDHR2	14	50839282	50892442	-	3929	protein_coding	cadherin related family member 2 [Source:HGNC Symbol;Acc:HGNC:18231]	Cadherin	1381	1901	3401	3505	10.3455	12.4528	22.9188	25.0544
ENSDARG00000094386	50.3133	124.277	174.368	194.584	87.2952	184.476	-1.07345	0.0076784	0.0400187	adgrg4b	10	26634472	26652593	+	2345	protein_coding	adhesion G protein-coupled receptor G4b [Source:ZFIN;Acc:ZDB-GENE-091204-201]	7tm_2	47	133	181	191	0.589924	1.45974	2.04364	2.28754
ENSDARG00000036462	80.2872	142.965	214.83	256.728	111.626	235.779	-1.07396	0.00112583	0.00835032	rab11fip1b	10	41318583	41352608	-	616	protein_coding	RAB11 family interacting protein 1 (class I) b [Source:ZFIN;Acc:ZDB-GENE-091204-322]	C2	75	153	223	252	3.58362	6.39258	9.585	11.4894
ENSDARG00000031325	144.517	134.556	289.008	298.497	139.536	293.753	-1.07465	2.21853e-05	0.000284396	tmed1a	3	47222096	47235997	-	3938	protein_coding	transmembrane p24 trafficking protein 1a [Source:ZFIN;Acc:ZDB-GENE-040801-229]	-	135	144	300	293	1.00902	0.941135	2.01704	2.08963
ENSDARG00000099979	54.5953	50.4584	102.116	119.195	52.5268	110.656	-1.07546	0.00727029	0.0382341	tgfbr3	6	24398907	24598752	+	3008	protein_coding	transforming growth factor, beta receptor III [Source:ZFIN;Acc:ZDB-GENE-120215-125]	Zona_pellucida	51	54	106	117	0.499037	0.462042	0.933031	1.09241
ENSDARG00000042856	166.997	55.1304	251.437	214.959	111.064	233.198	-1.07563	0.00928293	0.0463723	itpka	17	31363000	31394615	+	3108	protein_coding	inositol-trisphosphate 3-kinase A [Source:ZFIN;Acc:ZDB-GENE-030616-116]	-	156	59	261	211	1.47735	0.488581	2.22345	1.90669
ENSDARG00000004954	132.742	201.833	354.517	352.492	167.287	353.504	-1.07595	4.42938e-05	0.000520007	grna	3	29914427	29941357	-	4227	protein_coding	granulin a [Source:ZFIN;Acc:ZDB-GENE-030131-8434]	-	124	216	368	346	0.863436	1.31518	2.30507	2.29891
ENSDARG00000077130	279.399	327.045	571.273	709.058	303.222	640.166	-1.07646	8.51726e-08	1.88369e-06	bcl10	2	1945211	1954204	+	3859	protein_coding	B cell CLL/lymphoma 10 [Source:ZFIN;Acc:ZDB-GENE-100219-2]	CARD	261	350	593	696	1.9907	2.33431	4.06863	5.06539
ENSDARG00000103951	1249.27	1153.07	2380.47	2685.46	1201.17	2532.96	-1.07668	1.18603e-17	9.58231e-16	tspan34	1	57521361	57533548	+	1197	protein_coding	tetraspanin 34 [Source:ZFIN;Acc:ZDB-GENE-060825-202]	Tetraspannin	1167	1234	2471	2636	28.6957	26.533	54.6571	61.8486
ENSDARG00000076472	131.671	131.752	334.286	222.09	131.712	278.188	-1.07942	0.000205778	0.00196148	ovol1a	7	19835569	19848037	+	2536	protein_coding	ovo-like zinc finger 1a [Source:ZFIN;Acc:ZDB-GENE-031010-37]	-	123	141	347	218	1.42757	1.43099	3.62283	2.41427
ENSDARG00000068213	266.554	314.898	610.771	620.426	290.726	615.599	-1.08079	1.6288e-08	4.09914e-07	fzd10	8	44295983	44298964	-	2982	protein_coding	frizzled class receptor 10 [Source:ZFIN;Acc:ZDB-GENE-990415-220]	Fz	249	337	634	609	2.45772	2.90862	5.62924	5.73572
ENSDARG00000079623	80.2872	110.261	183.039	221.071	95.274	202.055	-1.08108	0.000721571	0.00572196	ubtd1b	12	2780190	2800859	-	1757	protein_coding	ubiquitin domain containing 1b [Source:ZFIN;Acc:ZDB-GENE-050913-62]	ubiquitin	75	118	190	217	1.25641	1.72852	2.86319	3.4687
ENSDARG00000095462	132.742	113.999	331.396	190.508	123.37	260.952	-1.08283	0.000762024	0.00599946	CELA1 (1 of many)	22	7472420	7476352	+	924	protein_coding	si:dkey-57c15.4 [Source:ZFIN;Acc:ZDB-GENE-050208-732]	Trypsin	124	122	344	187	3.94994	3.39823	9.85722	5.68392
ENSDARG00000005456	206.606	132.687	376.674	340.267	169.646	358.47	-1.08301	5.19118e-05	0.000596959	katnb1	7	52158818	52285349	+	3378	protein_coding	katanin p80 (WD repeat containing) subunit B 1 [Source:ZFIN;Acc:ZDB-GENE-040426-1954]	WD40	193	142	391	334	1.68166	1.08192	3.06468	2.77693
ENSDARG00000054916	570.574	663.434	1504.77	1110.45	617.004	1307.61	-1.08312	9.561e-10	2.89942e-08	eif4ebp3	21	26401332	26406304	-	1541	protein_coding	eukaryotic translation initiation factor 4E binding protein 3 [Source:ZFIN;Acc:ZDB-GENE-041114-44]	-	533	710	1562	1090	10.1804	11.8583	26.8378	19.8656
ENSDARG00000069828	64.2298	81.294	176.295	132.439	72.7619	154.367	-1.08334	0.00254561	0.0164851	si:ch211-117n7.7	13	9878544	9886579	-	1720	protein_coding	si:ch211-117n7.7 [Source:ZFIN;Acc:ZDB-GENE-060503-569]	-	60	87	183	130	1.02675	1.30184	2.81702	2.12272
ENSDARG00000014646	1343.47	1339.02	2177.2	3516.77	1341.24	2846.98	-1.0858	0.00130448	0.00946376	aoc2	3	32924185	32934359	-	3152	protein_coding	amine oxidase, copper containing 2 [Source:ZFIN;Acc:ZDB-GENE-050320-133]	-	1255	1433	2260	3452	11.7192	11.7011	18.9841	30.7583
ENSDARG00000102896	305.091	273.783	644.489	585.788	289.437	615.138	-1.08885	1.05491e-08	2.72694e-07	jmjd6	3	60575113	60589292	-	5710	protein_coding	jumonji domain containing 6 [Source:ZFIN;Acc:ZDB-GENE-040426-17]	JmjC	285	293	669	575	1.46909	1.32068	3.10212	2.8282
ENSDARG00000059256	49.2428	63.5402	105.97	134.477	56.3915	120.223	-1.08888	0.00613751	0.0335532	hoxd13a	9	1986816	1990323	-	1687	protein_coding	homeobox D13a [Source:ZFIN;Acc:ZDB-GENE-990415-119]	Homeobox	46	68	110	132	0.802571	1.03743	1.72642	2.19754
ENSDARG00000016490	65.3003	113.999	177.258	205.79	89.6494	191.524	-1.09011	0.00185839	0.0126838	rab11fip3	24	37722048	37794593	+	8313	protein_coding	RAB11 family interacting protein 3 (class II) [Source:ZFIN;Acc:ZDB-GENE-040724-138]	-	61	122	184	202	0.21598	0.377718	0.586041	0.682452
ENSDARG00000008637	389.661	361.618	893.036	708.04	375.639	800.538	-1.09255	3.67977e-09	1.01472e-07	mttp	1	12105901	12126625	-	4907	protein_coding	microsomal triglyceride transfer protein [Source:ZFIN;Acc:ZDB-GENE-040419-2]	Vitellogenin_N	364	387	927	695	2.18336	2.02983	5.00186	3.97784
ENSDARG00000068926	80.2872	120.539	184.002	245.522	100.413	214.762	-1.09266	0.000877189	0.00676466	si:ch211-137a8.2	15	29024895	29071870	+	3486	protein_coding	si:ch211-137a8.2 [Source:ZFIN;Acc:ZDB-GENE-061103-172]	-	75	129	191	241	0.633249	0.952418	1.45069	1.94164
ENSDARG00000095930	2936.37	4628.15	7304.2	8838.78	3782.26	8071.49	-1.09348	0.00178348	0.0122681	myha	5	32246872	32257316	+	5915	protein_coding	myosin, heavy chain a [Source:ZFIN;Acc:ZDB-GENE-060531-50]	Myosin_head	2743	4953	7582	8676	13.6493	21.5516	33.9388	41.1949
ENSDARG00000071592	120.966	46.7207	161.845	194.584	83.8434	178.214	-1.09358	0.00882193	0.0446397	aqp8a.2	12	20354691	20362061	-	1892	protein_coding	aquaporin 8a, tandem duplicate 2 [Source:ZFIN;Acc:ZDB-GENE-070112-1802]	-	113	50	168	191	1.75792	0.680165	2.35102	2.83524
ENSDARG00000070352	363.969	638.205	998.042	1144.07	501.087	1071.06	-1.09362	1.05134e-06	1.87604e-05	hoxc12a	23	36063599	36065182	+	825	protein_coding	homeobox C12a [Source:ZFIN;Acc:ZDB-GENE-000822-6]	Homeobox	340	683	1036	1123	12.1301	21.3075	33.2486	38.23
ENSDARG00000079123	226.945	264.439	467.23	582.732	245.692	524.981	-1.09372	3.77858e-07	7.37362e-06	ikbkb	8	2319091	2406699	+	2858	protein_coding	inhibitor of kappa light polypeptide gene enhancer in B-cells, kinase beta [Source:ZFIN;Acc:ZDB-GENE-071115-2]	Pkinase	212	283	485	572	2.18331	2.54853	4.49311	5.62098
ENSDARG00000038296	205.535	206.506	456.633	422.786	206.02	439.71	-1.09389	3.07162e-07	6.09178e-06	tmem86b	3	16762483	16770318	+	2782	protein_coding	transmembrane protein 86B [Source:ZFIN;Acc:ZDB-GENE-060825-132]	YhhN	192	221	474	415	2.03135	2.04456	4.51117	4.18957
ENSDARG00000114554	343.629	350.405	757.202	724.34	347.017	740.771	-1.09393	2.22594e-10	7.46356e-09	cdx1a	14	3287740	3312722	+	4042	protein_coding	caudal type homeobox 1a [Source:ZFIN;Acc:ZDB-GENE-050510-1]	Homeobox	321	375	786	711	2.33749	2.38781	5.14866	4.94028
ENSDARG00000079009	828.564	1184.84	2350.6	1951.95	1006.7	2151.27	-1.09449	1.96862e-10	6.66198e-09	abca1b	14	6423973	6519076	+	9432	protein_coding	ATP-binding cassette, sub-family A (ABC1), member 1B [Source:ZFIN;Acc:ZDB-GENE-030131-9826]	ABC_tran	774	1268	2440	1916	2.41534	3.46004	6.84942	5.70519
ENSDARG00000098239	416.423	434.503	878.585	941.336	425.463	909.961	-1.09627	1.05789e-11	4.22672e-10	zgc:85932	15	43333121	43389922	+	2339	protein_coding	zgc:85932 [Source:ZFIN;Acc:ZDB-GENE-040426-2460]	Peptidase_C2	389	465	912	924	4.89508	5.11668	10.3236	11.0948
ENSDARG00000010717	82.4282	87.8349	108.86	255.709	85.1316	182.285	-1.09684	0.00723815	0.0381418	chchd10	21	15704556	15708626	+	857	protein_coding	coiled-coil-helix-coiled-coil-helix domain containing 10 [Source:ZFIN;Acc:ZDB-GENE-040426-1753]	-	77	94	113	251	2.64454	2.82301	3.49113	8.22567
ENSDARG00000075292	159.504	181.276	325.616	404.449	170.39	365.032	-1.09753	6.91326e-06	0.000102067	myo15aa	3	40056485	40136743	-	13044	protein_coding	myosin XVAa [Source:ZFIN;Acc:ZDB-GENE-080425-2]	Myosin_head	149	194	338	397	0.336214	0.382786	0.686079	0.854787
ENSDARG00000102364	222.663	350.405	633.892	594.957	286.534	614.424	-1.0977	1.66096e-06	2.81694e-05	si:dkey-202l22.6	15	12004777	12011390	-	5724	protein_coding	si:dkey-202l22.6 [Source:ZFIN;Acc:ZDB-GENE-131121-181]	-	208	375	658	584	1.06956	1.68615	3.04365	2.86544
ENSDARG00000101379	191.619	238.276	430.622	492.062	214.947	461.342	-1.09963	7.87267e-07	1.44694e-05	mfsd1	15	1199407	1210546	+	1380	protein_coding	major facilitator superfamily domain containing 1 [Source:ZFIN;Acc:ZDB-GENE-051120-153]	MFS_1	179	255	447	483	3.81781	4.75583	8.57623	9.82984
ENSDARG00000076121	464.595	447.584	918.083	1037.1	456.09	977.591	-1.10001	8.17272e-12	3.29543e-10	smpd1	10	24709967	24724388	-	2933	protein_coding	sphingomyelin phosphodiesterase 1, acid lysosomal [Source:ZFIN;Acc:ZDB-GENE-110411-222]	Metallophos	434	479	953	1018	4.3553	4.20328	8.60298	9.74797
ENSDARG00000052405	154.151	267.242	471.084	435.011	210.697	453.047	-1.10104	3.19684e-05	0.00038886	pak6b	20	53521648	53568849	+	2269	protein_coding	p21 protein (Cdc42/Rac)-activated kinase 6b [Source:ZFIN;Acc:ZDB-GENE-041014-121]	Pkinase	144	286	489	427	1.86797	3.24412	5.70614	5.28533
ENSDARG00000103459	1617.52	1894.06	3882.35	3660.41	1755.79	3771.38	-1.1024	4.28514e-20	4.34366e-18	evplb	KN149912.1	57102	76613	-	6126	protein_coding	envoplakin b [Source:ZFIN;Acc:ZDB-GENE-030131-212]	-	1511	2027	4030	3593	7.25986	8.51612	17.4179	16.4725
ENSDARG00000003269	331.854	265.374	610.771	671.364	298.614	641.068	-1.10391	2.02131e-08	4.97826e-07	clcn3	7	7511914	7643941	+	6141	protein_coding	chloride channel 3 [Source:ZFIN;Acc:ZDB-GENE-030131-1699]	Voltage_CLC	310	284	634	659	1.48581	1.19027	2.73349	3.01387
ENSDARG00000079791	52.4543	69.1466	137.761	124.289	60.8005	131.025	-1.10491	0.00346543	0.0211884	si:ch211-176g6.2	12	657704	684200	-	4000	protein_coding	si:ch211-176g6.2 [Source:ZFIN;Acc:ZDB-GENE-121214-224]	DIL	49	74	143	122	0.360559	0.476143	0.946551	0.8566
ENSDARG00000030478	912.063	966.184	1897.82	2144.49	939.123	2021.16	-1.10529	4.22728e-17	3.1269e-15	zgc:66484	9	44897806	44905897	-	3914	protein_coding	zgc:66484 [Source:ZFIN;Acc:ZDB-GENE-030131-5768]	Amino_oxidase	852	1034	1970	2105	6.40707	6.79931	13.3264	15.1046
ENSDARG00000036442	111.332	182.211	341.03	292.385	146.771	316.707	-1.10598	0.000124667	0.00127253	atp11c	14	32507811	32631519	-	4558	protein_coding	ATPase phospholipid transporting 11C [Source:ZFIN;Acc:ZDB-GENE-030616-51]	E1-E2_ATPase	104	195	354	287	0.671583	1.1011	2.05635	1.76842
ENSDARG00000077047	83.4987	81.294	154.138	200.696	82.3964	177.417	-1.10618	0.000826162	0.00643044	ptprnb	6	13920479	13987739	+	3550	protein_coding	protein tyrosine phosphatase, receptor type, Nb [Source:ZFIN;Acc:ZDB-GENE-100505-1]	Y_phosphatase	78	87	160	197	0.646706	0.630748	1.19333	1.55853
ENSDARG00000036308	54.5953	57.9337	122.347	120.214	56.2645	121.28	-1.1074	0.0037247	0.0224229	nod1	16	53710416	53734405	+	3097	protein_coding	nucleotide-binding oligomerization domain containing 1 [Source:ZFIN;Acc:ZDB-GENE-071116-9]	NACHT	51	62	127	118	0.484696	0.515247	1.08575	1.07009
ENSDARG00000009549	803.943	918.529	1602.07	2121.06	861.236	1861.57	-1.1112	4.94059e-12	2.04102e-10	ubr4	23	21278948	21376847	+	16386	protein_coding	ubiquitin protein ligase E3 component n-recognin 4 [Source:ZFIN;Acc:ZDB-GENE-090313-341]	zf-UBR1	751	983	1663	2082	1.34899	1.54399	2.68712	3.5685
ENSDARG00000019137	171.279	177.539	370.894	384.073	174.409	377.484	-1.11348	9.89113e-07	1.77805e-05	tram1	24	14214831	14234824	+	2407	protein_coding	translocation associated membrane protein 1 [Source:ZFIN;Acc:ZDB-GENE-021011-1]	LAG1	160	190	385	377	1.95652	2.03162	4.23499	4.3989
ENSDARG00000022995	1408.77	1493.19	3099.13	3191.78	1450.98	3145.46	-1.11589	3.08413e-23	4.16834e-21	clic4	17	25444323	25480375	+	3222	protein_coding	chloride intracellular channel 4 [Source:ZFIN;Acc:ZDB-GENE-030326-3]	-	1316	1598	3217	3133	12.0218	12.7649	26.4359	27.3095
ENSDARG00000114451	494.569	784.908	1520.18	1256.13	639.739	1388.16	-1.11602	3.0612e-08	7.34118e-07	mmp13a	10	38610741	38620514	+	2556	protein_coding	matrix metallopeptidase 13a [Source:ZFIN;Acc:ZDB-GENE-031202-2]	PG_binding_1	462	840	1578	1233	5.32013	8.45831	16.3461	13.5482
ENSDARG00000002787	207.676	201.833	392.088	496.137	204.755	444.113	-1.11684	7.84733e-07	1.44506e-05	tle3a	18	20225961	20257511	+	4159	protein_coding	transducin-like enhancer of split 3a [Source:ZFIN;Acc:ZDB-GENE-990415-86]	-	194	216	407	487	1.37295	1.33669	2.59104	3.28866
ENSDARG00000062532	193.76	202.768	460.487	400.373	198.264	430.43	-1.1182	3.83811e-07	7.46317e-06	washc2c	13	18073211	18122333	-	4787	protein_coding	WASH complex subunit 2C [Source:ZFIN;Acc:ZDB-GENE-060825-87]	-	181	217	478	393	1.1129	1.16671	2.64382	2.30572
ENSDARG00000104450	1063	1211	2478.73	2466.42	1137	2472.58	-1.12005	2.13229e-19	1.98666e-17	CR855996.2	10	17026870	17062546	+	4205	protein_coding	-	-	993	1296	2573	2421	6.95063	7.93239	16.201	16.1699
ENSDARG00000051711	71.7232	65.409	131.017	167.077	68.5661	149.047	-1.12065	0.0016913	0.0117261	CR339041.2	25	10929790	10935577	+	1891	protein_coding	-	C1-set	67	70	136	164	1.04286	0.952734	1.90421	2.43574
ENSDARG00000044204	71.7232	97.1791	249.511	118.176	84.4512	183.843	-1.12116	0.00495607	0.0283176	endou	6	39905021	39912440	+	1394	protein_coding	endonuclease, polyU-specific [Source:ZFIN;Acc:ZDB-GENE-070112-2012]	-	67	104	259	116	1.41466	1.92015	4.91932	2.33708
ENSDARG00000115301	262.272	237.341	547.189	539.944	249.806	543.566	-1.12267	1.23641e-08	3.16251e-07	lurap1	6	30625945	30658848	-	5987	protein_coding	leucine rich adaptor protein 1 [Source:ZFIN;Acc:ZDB-GENE-070928-35]	-	245	254	568	530	1.20447	1.09192	2.51193	2.48625
ENSDARG00000035338	118.825	120.539	289.972	231.259	119.682	260.615	-1.12306	5.46142e-05	0.000622477	tppp2	5	37056818	37065741	+	991	protein_coding	tubulin polymerization-promoting protein family member 2 [Source:ZFIN;Acc:ZDB-GENE-140106-24]	p25-alpha	111	129	301	227	3.29678	3.35028	8.04194	6.43325
ENSDARG00000002644	407.859	466.273	874.732	1030.99	437.066	952.86	-1.12314	5.66188e-11	2.05925e-09	rgs5a	6	35387367	35439406	-	3255	protein_coding	regulator of G protein signaling 5a [Source:ZFIN;Acc:ZDB-GENE-030131-7570]	-	381	499	908	1012	3.4452	3.94562	7.38589	8.73188
ENSDARG00000056986	55.6658	115.867	191.709	183.377	85.7666	187.543	-1.12316	0.00273442	0.0174957	dact2	13	43400443	43407199	+	3021	protein_coding	dishevelled-binding antagonist of beta-catenin 2 [Source:ZFIN;Acc:ZDB-GENE-030131-9975]	-	52	124	199	180	0.506633	1.05642	1.7441	1.6734
ENSDARG00000099791	46.0313	63.5402	143.541	95.7636	54.7857	119.652	-1.12461	0.00706739	0.037395	pdk3b	21	40589770	40613000	+	2131	protein_coding	pyruvate dehydrogenase kinase, isozyme 3b [Source:ZFIN;Acc:ZDB-GENE-070112-1892]	HATPase_c	43	68	149	94	0.593917	0.821279	1.85127	1.23886
ENSDARG00000089307	360.757	462.535	964.324	833.347	411.646	898.836	-1.12512	9.20348e-10	2.80265e-08	pmaip1	10	8656417	8657684	+	1171	protein_coding	phorbol-12-myristate-13-acetate-induced protein 1 [Source:ZFIN;Acc:ZDB-GENE-070119-3]	-	337	495	1001	818	8.47059	10.8796	22.6332	19.6189
ENSDARG00000045051	724.726	859.661	1771.62	1689.11	792.193	1730.36	-1.12614	1.28915e-15	7.97345e-14	slc16a3	12	33350256	33359654	-	3126	protein_coding	solute carrier family 16 (monocarboxylate transporter), member 3 [Source:ZFIN;Acc:ZDB-GENE-030131-5487]	MFS_1	677	920	1839	1658	6.37442	7.57468	15.5762	14.8961
ENSDARG00000078797	323.29	429.831	775.506	871.042	376.56	823.274	-1.1263	3.46231e-09	9.59586e-08	dennd3a	19	1688727	1738445	+	6987	protein_coding	DENN/MADD domain containing 3a [Source:ZFIN;Acc:ZDB-GENE-091230-6]	DENN	302	460	805	855	1.2722	1.69446	3.05051	3.4368
ENSDARG00000062457	147.728	102.786	287.082	258.766	125.257	272.924	-1.12723	7.82261e-05	0.000853818	las1l	5	22115250	22130937	-	2642	protein_coding	LAS1-like, ribosome biogenesis factor [Source:ZFIN;Acc:ZDB-GENE-030131-3625]	-	138	110	298	254	1.5374	1.07158	2.98642	2.7001
ENSDARG00000032010	1774.88	1904.34	3671.37	4373.55	1839.61	4022.46	-1.1283	4.77706e-20	4.77597e-18	slc15a2	9	37320222	37339656	+	3271	protein_coding	solute carrier family 15 (oligopeptide transporter), member 2 [Source:ZFIN;Acc:ZDB-GENE-030131-5866]	-	1658	2038	3811	4293	14.9192	16.0357	30.848	36.8603
ENSDARG00000012467	390.731	489.633	1048.14	879.192	440.182	963.664	-1.12913	3.91756e-10	1.27074e-08	spint1b	20	3218893	3238110	-	2436	protein_coding	serine peptidase inhibitor, Kunitz type 1 b [Source:ZFIN;Acc:ZDB-GENE-071218-1]	Kunitz_BPTI	365	524	1088	863	4.41018	5.5363	11.8255	9.94974
ENSDARG00000113393	94.2037	122.408	250.474	224.128	108.306	237.301	-1.12915	0.000113646	0.00117205	CABZ01080601.1	18	5192343	5209258	-	3795	protein_coding	-	-	88	131	260	220	0.682514	0.888433	1.81397	1.62813
ENSDARG00000098641	37.4674	82.2284	119.457	143.645	59.8479	131.551	-1.12951	0.00923492	0.0461717	nbeal2	16	16358348	16522013	-	9094	protein_coding	neurobeachin-like 2 [Source:ZFIN;Acc:ZDB-GENE-100922-283]	Beach	35	88	124	141	0.11328	0.249054	0.361023	0.435454
ENSDARG00000100312	87.7807	161.654	207.123	341.285	124.717	274.204	-1.13214	0.00119269	0.00877779	hoxa13a	19	19729506	19731291	+	1669	protein_coding	homeobox A13a [Source:ZFIN;Acc:ZDB-GENE-990415-5]	Homeobox	82	173	215	335	1.4461	2.66781	3.41075	5.63724
ENSDARG00000040528	164.856	181.276	345.847	413.617	173.066	379.732	-1.13234	1.69005e-06	2.85742e-05	lgals3bpb	3	57741933	57744323	-	1994	protein_coding	lectin, galactoside-binding, soluble, 3 binding protein b [Source:ZFIN;Acc:ZDB-GENE-040426-2262]	SRCR	154	194	359	406	2.27319	2.50404	4.76691	5.71846
ENSDARG00000039374	359.687	405.536	869.915	808.897	382.611	839.406	-1.13257	2.97766e-11	1.11828e-09	apool	5	22851857	22868650	-	1761	protein_coding	apolipoprotein O-like [Source:ZFIN;Acc:ZDB-GENE-050327-76]	-	336	434	903	794	5.61592	6.34301	13.5768	12.6631
ENSDARG00000044935	2681.59	4903.81	8631.72	8000.34	3792.7	8316.03	-1.13259	0.00780404	0.0405769	hpdb	8	34731982	34742234	+	1621	protein_coding	4-hydroxyphenylpyruvate dioxygenase b [Source:ZFIN;Acc:ZDB-GENE-040808-62]	Glyoxalase	2505	5248	8960	7853	45.4847	83.3251	146.35	136.06
ENSDARG00000077330	359.687	396.192	707.107	953.561	377.939	830.334	-1.13446	5.22177e-09	1.40662e-07	SH3TC1	7	61843532	61901695	-	7310	protein_coding	SH3 domain and tetratricopeptide repeats 1 [Source:HGNC Symbol;Acc:HGNC:26009]	-	336	424	734	936	1.35289	1.49284	2.65856	3.59614
ENSDARG00000070272	163.786	170.998	464.34	270.991	167.392	367.665	-1.13561	7.23298e-05	0.000797413	casp8l2	9	1313418	1357809	+	2251	protein_coding	caspase 8, apoptosis-related cysteine peptidase, like 2 [Source:ZFIN;Acc:ZDB-GENE-070608-2]	Peptidase_C14	153	183	482	266	2.00058	2.09238	5.66943	3.31883
ENSDARG00000018361	168.068	90.6382	255.291	311.741	129.353	283.516	-1.13627	0.000378642	0.00328832	sult1st3	8	46559332	46581448	-	1625	protein_coding	sulfotransferase family 1, cytosolic sulfotransferase 3 [Source:ZFIN;Acc:ZDB-GENE-030804-28]	Sulfotransfer_1	157	97	265	306	2.84372	1.53633	4.31778	5.28867
ENSDARG00000055592	878.877	1359.57	2619.38	2305.46	1119.22	2462.42	-1.13643	1.88018e-10	6.38242e-09	capn2b	22	26328063	26353916	-	2454	protein_coding	calpain 2, (m/II) large subunit b [Source:ZFIN;Acc:ZDB-GENE-050522-84]	Peptidase_C2	821	1455	2719	2263	9.84712	15.26	29.3361	25.8993
ENSDARG00000040298	2916.03	2592.06	6174.18	5932.25	2754.05	6053.22	-1.13655	2.0514e-26	3.32707e-24	apoa4b.1	16	23913943	23916263	+	1796	protein_coding	apolipoprotein A-IV b, tandem duplicate 1 [Source:ZFIN;Acc:ZDB-GENE-030131-1263]	-	2724	2774	6409	5823	44.6418	39.7526	94.4826	91.0581
ENSDARG00000077788	97.4151	117.736	225.427	248.578	107.576	237.002	-1.13729	7.66409e-05	0.000839371	arhgef10	17	25197180	25259478	+	4102	protein_coding	Rho guanine nucleotide exchange factor (GEF) 10 [Source:ZFIN;Acc:ZDB-GENE-030131-6210]	RhoGEF	91	126	234	244	0.65296	0.79057	1.51039	1.6706
ENSDARG00000056239	541.671	554.108	1174.34	1236.78	547.889	1205.56	-1.13747	6.09997e-15	3.46906e-13	tmem45b	21	25236297	25247052	+	1700	protein_coding	transmembrane protein 45B [Source:ZFIN;Acc:ZDB-GENE-040426-1904]	-	506	593	1219	1214	8.76077	8.97782	18.9855	20.0562
ENSDARG00000102733	92.0627	96.2447	184.965	230.24	94.1537	207.603	-1.13976	0.000204513	0.00195282	emc4	KN150334.1	14450	16282	-	1520	protein_coding	ER membrane protein complex subunit 4 [Source:ZFIN;Acc:ZDB-GENE-040426-1891]	-	86	103	192	226	1.66531	1.74405	3.34446	4.17583
ENSDARG00000074311	124.178	173.801	422.916	234.315	148.989	328.615	-1.13977	0.00033511	0.00296675	mast2	6	33663666	33871055	-	9451	protein_coding	microtubule associated serine/threonine kinase 2 [Source:ZFIN;Acc:ZDB-GENE-050309-150]	Pkinase	116	186	439	230	0.361261	0.506524	1.22986	0.683484
ENSDARG00000099374	275.117	447.584	716.741	879.192	361.351	797.966	-1.14022	6.0054e-07	1.12191e-05	sp9	9	2591968	2594464	-	2497	protein_coding	sp9 transcription factor [Source:ZFIN;Acc:ZDB-GENE-040426-2313]	zf-C2H2	257	479	744	863	3.02939	4.93722	7.88901	9.70668
ENSDARG00000110581	54.5953	60.7369	123.31	131.42	57.6661	127.365	-1.14177	0.00240565	0.0156901	mapk4	8	29742237	29769157	+	7452	protein_coding	mitogen-activated protein kinase 4 [Source:ZFIN;Acc:ZDB-GENE-040426-2835]	Pkinase	51	65	128	129	0.201436	0.224495	0.454784	0.486178
ENSDARG00000032571	200.183	212.112	428.696	481.874	206.147	455.285	-1.14226	1.02769e-07	2.23671e-06	il20ra	20	2589414	2609270	+	2876	protein_coding	interleukin 20 receptor, alpha [Source:ZFIN;Acc:ZDB-GENE-040724-249]	-	187	227	445	473	1.91379	2.03143	4.09675	4.61903
ENSDARG00000061810	254.778	467.207	746.605	850.666	360.993	798.636	-1.14274	2.83035e-06	4.57684e-05	si:dkey-110c1.10	22	20246587	20309283	-	9191	protein_coding	si:dkey-110c1.10 [Source:ZFIN;Acc:ZDB-GENE-050208-429]	Myosin_head	238	500	775	835	0.762176	1.40014	2.23258	2.55154
ENSDARG00000043171	266.554	202.768	685.913	349.435	234.661	517.674	-1.14344	9.56294e-05	0.0010151	CELA1 (1 of many)	22	7486867	7492548	+	1373	protein_coding	zgc:112302 [Source:ZFIN;Acc:ZDB-GENE-050626-127]	Trypsin	249	217	712	343	5.33789	4.06775	13.7302	7.0162
ENSDARG00000090548	219.452	205.571	510.581	427.88	212.511	469.231	-1.14374	1.33439e-07	2.85318e-06	CR753886.1	24	11058151	11069237	-	5773	protein_coding	-	-	205	220	530	420	1.04518	0.980813	2.43076	2.04327
ENSDARG00000043443	112.402	88.7693	233.133	210.884	100.586	222.009	-1.14493	0.000128262	0.0013074	kcnj13	15	40217256	40267485	-	6938	protein_coding	potassium inwardly-rectifying channel, subfamily J, member 13 [Source:ZFIN;Acc:ZDB-GENE-070129-1]	-	105	95	242	207	0.445447	0.352415	0.923526	0.837943
ENSDARG00000075831	2836.81	2833.14	6413.09	6137.02	2834.98	6275.06	-1.14633	2.88291e-31	6.50734e-29	slc7a8a	7	24208611	24236364	-	6116	protein_coding	solute carrier family 7 (amino acid transporter light chain, L system), member 8a [Source:ZFIN;Acc:ZDB-GENE-121120-2]	-	2650	3032	6657	6024	12.7532	12.7593	28.819	27.6628
ENSDARG00000052536	62.0888	89.7038	163.771	173.19	75.8963	168.48	-1.14653	0.000920238	0.00704005	tia1	5	56950861	56964547	-	3416	protein_coding	TIA1 cytotoxic granule-associated RNA binding protein [Source:ZFIN;Acc:ZDB-GENE-030131-1506]	RRM_1	58	96	170	170	0.499748	0.7233	1.31765	1.39769
ENSDARG00000095949	83.4987	135.49	272.631	213.94	109.494	243.286	-1.14813	0.000338179	0.00298825	si:dkey-22i16.9	1	43973880	43983405	-	4044	protein_coding	si:dkey-22i16.9 [Source:ZFIN;Acc:ZDB-GENE-090313-261]	V-set	78	145	283	210	0.567707	0.922831	1.85286	1.45843
ENSDARG00000090190	647.65	783.039	1525.96	1651.41	715.345	1588.69	-1.14984	7.43947e-15	4.20897e-13	bcam	16	24030272	24135573	-	2222	protein_coding	basal cell adhesion molecule (Lutheran blood group) [Source:ZFIN;Acc:ZDB-GENE-060929-620]	V-set	605	838	1584	1621	8.01405	9.70656	18.8747	20.4888
ENSDARG00000074094	1040.52	1022.25	2364.09	2214.79	1031.39	2289.44	-1.15061	3.04562e-21	3.43731e-19	tgm2b	6	2093206	2122486	+	3330	protein_coding	transglutaminase 2b [Source:ZFIN;Acc:ZDB-GENE-030131-2576]	Transglut_core	972	1094	2454	2174	8.59138	8.45548	19.5118	18.3355
ENSDARG00000008931	408.929	405.536	815.004	995.33	407.233	905.167	-1.15208	3.46083e-11	1.29088e-09	renbp	8	37030974	37043900	-	1889	protein_coding	renin binding protein [Source:ZFIN;Acc:ZDB-GENE-041212-34]	GlcNAc_2-epim	382	434	846	977	5.95213	5.91321	11.8579	14.5258
ENSDARG00000017489	159.504	169.129	286.118	445.199	164.316	365.659	-1.15285	2.26413e-05	0.000289393	zgc:123068	13	37605896	37608441	-	1222	protein_coding	zgc:123068 [Source:ZFIN;Acc:ZDB-GENE-051030-98]	-	149	181	297	437	3.58885	3.81217	6.43507	10.0436
ENSDARG00000017612	56.7363	47.6551	112.713	119.195	52.1957	115.954	-1.15345	0.00354781	0.0215536	pnpo	12	28799988	28807184	+	2155	protein_coding	pyridoxamine 5'-phosphate oxidase [Source:ZFIN;Acc:ZDB-GENE-060602-2]	Pyridox_oxidase	53	51	117	117	0.723885	0.609099	1.4375	1.52481
ENSDARG00000104773	3300.34	2867.72	5890.95	7865.86	3084.03	6878.41	-1.1574	1.55776e-16	1.08276e-14	junbb	3	7654655	7656059	-	1405	protein_coding	JunB proto-oncogene, AP-1 transcription factor subunit b [Source:ZFIN;Acc:ZDB-GENE-040426-2666]	Jun	3083	3069	6115	7721	64.5859	56.2194	115.236	154.339
ENSDARG00000074852	175.561	185.014	372.821	431.955	180.288	402.388	-1.15744	3.87007e-07	7.51865e-06	myo15b	12	33661781	33706726	-	5445	protein_coding	myosin XVB [Source:ZFIN;Acc:ZDB-GENE-030131-4797]	SH3_2	164	198	387	424	0.886516	0.935907	1.88183	2.18699
ENSDARG00000056873	545.953	931.611	1604	1695.22	738.782	1649.61	-1.15839	0.00206194	0.013857	and3	10	22848556	22854758	-	1211	protein_coding	actinodin3 [Source:ZFIN;Acc:ZDB-GENE-040724-185]	-	510	997	1665	1664	12.3956	21.1893	36.4031	38.5911
ENSDARG00000058229	219.452	247.62	565.493	477.799	233.536	521.646	-1.15862	3.49464e-08	8.32592e-07	acot11a	2	11028923	11063878	+	2575	protein_coding	acyl-CoA thioesterase 11a [Source:ZFIN;Acc:ZDB-GENE-050522-538]	START	205	265	587	469	2.34324	2.64871	6.03572	5.11533
ENSDARG00000007990	74.9347	72.8843	199.416	130.402	73.9095	164.909	-1.15898	0.00128849	0.00935936	wt1b	18	45594085	45617146	-	1389	protein_coding	wilms tumor 1b [Source:ZFIN;Acc:ZDB-GENE-050420-319]	WT1	70	78	207	128	1.48333	1.4453	3.94581	2.58813
ENSDARG00000007443	51.3838	38.311	99.2262	100.857	44.8474	100.042	-1.16084	0.00686486	0.0365107	fbxl18	1	8638162	8646941	-	2626	protein_coding	F-box and leucine-rich repeat protein 18 [Source:ZFIN;Acc:ZDB-GENE-050913-65]	F-box	48	41	103	99	0.538006	0.401841	1.03851	1.05881
ENSDARG00000017314	10389.2	10641.1	30328.5	16697.5	10515.1	23513	-1.161	0.00551896	0.0307945	zgc:92041	22	7439186	7447391	+	5031	protein_coding	zgc:92041 [Source:ZFIN;Acc:ZDB-GENE-040808-55]	Trypsin	9705	11388	31482	16390	56.7783	58.2584	165.682	91.4962
ENSDARG00000097217	67.4413	46.7207	125.237	129.383	57.081	127.31	-1.1612	0.00292224	0.0184867	si:dkey-229e3.2	17	39741926	39751592	+	1187	protein_coding	si:dkey-229e3.2 [Source:ZFIN;Acc:ZDB-GENE-131121-296]	-	63	50	130	127	1.56218	1.08414	2.89975	3.00491
ENSDARG00000018060	104.909	76.622	159.918	245.522	90.7653	202.72	-1.16132	0.000744225	0.00588473	pik3r2	2	24700922	24755347	+	9546	protein_coding	phosphoinositide-3-kinase, regulatory subunit 2 (beta) [Source:ZFIN;Acc:ZDB-GENE-040309-1]	RhoGAP	98	82	166	241	0.302166	0.221084	0.46042	0.709045
ENSDARG00000022466	58.8773	81.294	149.321	165.039	70.0857	157.18	-1.16153	0.00104246	0.00782639	clcn5b	7	22853788	22900344	+	6823	protein_coding	chloride channel, voltage-sensitive 5b [Source:ZFIN;Acc:ZDB-GENE-110407-11]	Voltage_CLC	55	87	155	162	0.237262	0.328178	0.601484	0.666834
ENSDARG00000062326	1688.17	1716.52	3632.83	3984.38	1702.35	3808.61	-1.16158	1.65267e-25	2.51287e-23	hmgn7	5	22969635	22972775	+	1647	protein_coding	high mobility group nucleosomal binding domain 7 [Source:ZFIN;Acc:ZDB-GENE-061215-23]	-	1577	1837	3771	3911	28.1825	28.7065	60.6221	66.6918
ENSDARG00000105416	47.1018	69.1466	120.42	140.589	58.1242	130.505	-1.16247	0.00293785	0.0185533	adgrg4a	14	31721171	31751154	+	4586	protein_coding	adhesion G protein-coupled receptor G4a [Source:ZFIN;Acc:ZDB-GENE-121129-2]	7tm_2	44	74	125	138	0.282397	0.415301	0.721679	0.84513
ENSDARG00000069988	53.5248	93.4414	213.866	116.139	73.4831	165.003	-1.16373	0.00496231	0.0283319	arid6	21	11244068	11251815	+	2211	protein_coding	AT-rich interaction domain 6 [Source:ZFIN;Acc:ZDB-GENE-070112-1882]	ARID	50	100	222	114	0.665613	1.16406	2.65847	1.44809
ENSDARG00000010981	67.4413	85.9661	157.991	186.433	76.7037	172.212	-1.16381	0.000573449	0.00470426	zdhhc3a	16	39196727	39233451	+	1975	protein_coding	zinc finger, DHHC-type containing 3a [Source:ZFIN;Acc:ZDB-GENE-040718-484]	-	63	92	164	183	0.938889	1.19891	2.19859	2.60233
ENSDARG00000098362	77.0757	42.0486	122.347	143.645	59.5622	132.996	-1.1643	0.004521	0.0263544	CABZ01081747.1	KN150703.1	188	14726	-	6177	protein_coding	-	-	72	45	127	141	0.34308	0.1875	0.54437	0.641091
ENSDARG00000090338	73.8642	68.2122	129.09	189.49	71.0382	159.29	-1.165	0.00126777	0.00922187	fam20cb	12	18234557	18343653	+	2523	protein_coding	family with sequence similarity 20, member Cb [Source:ZFIN;Acc:ZDB-GENE-050301-4]	DUF1193	69	73	134	186	0.804957	0.744682	1.40623	2.07049
ENSDARG00000090598	47.1018	59.8025	104.043	136.514	53.4522	120.279	-1.16682	0.00374023	0.0224917	pkp1a	23	5631381	5639675	+	643	protein_coding	plakophilin 1a [Source:ZFIN;Acc:ZDB-GENE-110411-77]	-	44	64	108	134	2.01411	2.56174	4.44714	5.85291
ENSDARG00000086881	892.794	817.612	1571.24	2272.86	855.203	1922.05	-1.16838	1.4957e-11	5.85557e-10	ier2b	11	31038409	31039533	-	1125	protein_coding	immediate early response 2b [Source:ZFIN;Acc:ZDB-GENE-030131-8244]	-	834	875	1631	2231	21.82	20.018	38.3857	55.6962
ENSDARG00000061439	209.817	213.981	492.278	460.48	211.899	476.379	-1.16867	1.97245e-08	4.88539e-07	ugt5c3	18	40471826	40477865	+	2844	protein_coding	UDP glucuronosyltransferase 5 family, polypeptide C3 [Source:ZFIN;Acc:ZDB-GENE-050419-23]	UDPGT	196	229	511	452	2.02846	2.07239	4.75729	4.46362
ENSDARG00000075715	49.2428	48.5895	87.6659	132.439	48.9162	110.052	-1.16904	0.00595242	0.0327129	TMEM236	2	31454562	31457860	+	1084	protein_coding	si:dkey-32m20.1 [Source:ZFIN;Acc:ZDB-GENE-070705-455]	-	46	52	91	130	1.24902	1.23464	2.2227	3.36816
ENSDARG00000058553	153.081	222.391	446.036	401.392	187.736	423.714	-1.17143	1.96553e-06	3.27763e-05	sprb	8	1065458	1070636	+	1409	protein_coding	sepiapterin reductase b [Source:ZFIN;Acc:ZDB-GENE-070719-1]	adh_short	143	238	463	394	2.98721	4.34742	8.70037	7.85351
ENSDARG00000056018	126.319	217.718	393.051	384.073	172.019	388.562	-1.17165	2.08584e-05	0.000270393	itga6l	14	41528635	41600040	-	7598	protein_coding	integrin, alpha 6, like [Source:ZFIN;Acc:ZDB-GENE-040914-57]	-	118	233	408	377	0.457113	0.789263	1.42177	1.39354
ENSDARG00000099313	2988.82	2778.95	5752.23	7241.36	2883.89	6496.79	-1.17178	1.41977e-20	1.5389e-18	naga	4	982028	992148	-	5696	protein_coding	N-acetylgalactosaminidase, alpha [Source:ZFIN;Acc:ZDB-GENE-051113-256]	-	2792	2974	5971	7108	14.4273	13.4381	27.7552	35.0474
ENSDARG00000055656	133.812	172.867	287.082	406.486	153.339	346.784	-1.17457	1.72757e-05	0.00022855	pdzd3b	5	30680804	30697908	+	1994	protein_coding	PDZ domain containing 3b [Source:ZFIN;Acc:ZDB-GENE-081022-151]	PDZ	125	185	298	399	1.84512	2.38788	3.95694	5.61987
ENSDARG00000007534	71.7232	125.211	265.888	180.321	98.4674	223.104	-1.17629	0.000845281	0.00655594	itln1	1	15204633	15224338	+	2191	protein_coding	intelectin 1 [Source:ZFIN;Acc:ZDB-GENE-060929-564]	Fibrinogen_C	67	134	276	177	0.900064	1.57408	3.3353	2.26887
ENSDARG00000068910	67.4413	70.0811	144.504	167.077	68.7612	155.791	-1.17915	0.0006465	0.00520983	nos1	5	12100126	12272689	-	5681	protein_coding	nitric oxide synthase 1 (neuronal) [Source:ZFIN;Acc:ZDB-GENE-001101-1]	NAD_binding_1	63	75	150	164	0.326405	0.339783	0.699092	0.81077
ENSDARG00000016494	428.198	478.42	917.12	1137.96	453.309	1027.54	-1.17952	9.27695e-12	3.72695e-10	ddc	16	8298542	8342749	-	4346	protein_coding	dopa decarboxylase [Source:ZFIN;Acc:ZDB-GENE-040426-2656]	-	400	512	952	1117	2.70901	3.03211	5.79983	7.21841
ENSDARG00000088515	100.627	165.391	290.935	313.779	133.009	302.357	-1.18044	5.15852e-05	0.000594139	st6gal2b	6	15437132	15492073	-	2633	protein_coding	ST6 beta-galactosamide alpha-2,6-sialyltranferase 2b [Source:ZFIN;Acc:ZDB-GENE-120426-2]	Glyco_transf_29	94	177	302	308	1.05079	1.73017	3.03685	3.28532
ENSDARG00000055240	329.713	347.602	674.353	861.873	338.657	768.113	-1.18069	5.39049e-10	1.70803e-08	xdh	17	33340675	33374538	+	5906	protein_coding	xanthine dehydrogenase [Source:ZFIN;Acc:ZDB-GENE-070719-9]	Fer2	308	372	700	846	1.53496	1.62112	3.13814	4.02305
ENSDARG00000090340	72.7937	99.9823	222.536	170.133	86.388	196.335	-1.1818	0.000382996	0.00332107	si:dkey-27o4.1	3	39619571	39627412	-	5242	protein_coding	si:dkey-27o4.1 [Source:ZFIN;Acc:ZDB-GENE-131121-60]	-	68	107	231	167	0.381815	0.525354	1.16676	0.894742
ENSDARG00000071437	108.12	130.818	300.569	242.465	119.469	271.517	-1.18291	2.40871e-05	0.000305094	ptprc	22	22977268	23067859	-	4286	protein_coding	protein tyrosine phosphatase, receptor type, C [Source:ZFIN;Acc:ZDB-GENE-050208-585]	-	101	140	312	238	0.693601	0.8407	1.92739	1.55956
ENSDARG00000078733	187.337	189.686	402.685	454.368	188.511	428.526	-1.18434	7.95183e-08	1.76936e-06	cnnm2b	1	31725154	31799359	+	5073	protein_coding	cyclin and CBS domain divalent metal cation transport mediator 2b [Source:ZFIN;Acc:ZDB-GENE-090311-26]	-	175	203	418	446	1.01535	1.0299	2.18162	2.46915
ENSDARG00000075172	267.624	276.587	602.101	637.745	272.105	619.923	-1.18747	2.29478e-10	7.67088e-09	fbxo25	23	35468834	35483310	-	2641	protein_coding	F-box protein 25 [Source:ZFIN;Acc:ZDB-GENE-040801-19]	-	250	296	625	626	2.7862	2.88462	6.26584	6.65709
ENSDARG00000016474	656.214	607.369	1415.18	1461.92	631.792	1438.55	-1.18766	1.7979e-17	1.42112e-15	galcb	17	18889637	18898115	-	2320	protein_coding	galactosylceramidase b [Source:ZFIN;Acc:ZDB-GENE-040426-2115]	-	613	650	1469	1435	7.77702	7.21092	16.7649	17.3717
ENSDARG00000030177	214.099	149.506	297.679	529.756	181.803	413.717	-1.18777	7.51424e-05	0.000824683	uchl3	9	21971260	21976670	-	1314	protein_coding	ubiquitin carboxyl-terminal esterase L3 (ubiquitin thiolesterase) [Source:ZFIN;Acc:ZDB-GENE-050522-158]	-	200	160	309	520	4.47997	3.13393	6.22631	11.1144
ENSDARG00000043843	133.812	153.244	288.045	367.773	143.528	327.909	-1.19014	4.73482e-06	7.28523e-05	akap7	20	2460864	2479450	+	585	protein_coding	A kinase (PRKA) anchor protein 7 [Source:ZFIN;Acc:ZDB-GENE-040724-128]	-	125	164	299	361	6.28919	7.21528	13.5327	17.3312
ENSDARG00000069888	1143.29	1464.23	2933.43	3024.7	1303.76	2979.07	-1.19117	4.60215e-18	3.87554e-16	cldna	15	2655566	2657508	-	1943	protein_coding	claudin a [Source:ZFIN;Acc:ZDB-GENE-010328-1]	-	1068	1567	3045	2969	16.1785	20.7569	41.4937	42.9157
ENSDARG00000102578	51.3838	46.7207	106.933	117.158	49.0523	112.045	-1.1926	0.00304737	0.019117	mif4gdb	3	11079404	11089062	-	1387	protein_coding	MIF4G domain containing b [Source:ZFIN;Acc:ZDB-GENE-050227-7]	-	48	50	111	115	1.0186	0.927809	2.11892	2.32863
ENSDARG00000058108	533.107	616.713	1246.59	1384.5	574.91	1315.54	-1.19304	5.46249e-15	3.12275e-13	eps8l2	25	3994391	4129303	+	3940	protein_coding	EPS8 like 2 [Source:ZFIN;Acc:ZDB-GENE-131121-340]	SH3_1	498	660	1294	1359	3.72027	4.31135	8.69573	9.68727
ENSDARG00000101861	422.846	410.208	864.135	1044.23	416.527	954.183	-1.1958	2.42314e-12	1.0262e-10	cyp2k19	3	12732382	12740310	+	3437	protein_coding	cytochrome P450, family 2, subfamily k, polypeptide 19 [Source:ZFIN;Acc:ZDB-GENE-091211-1]	p450	395	439	897	1025	3.38266	3.28738	6.91004	8.37573
ENSDARG00000060001	166.997	96.2447	274.558	327.023	131.621	300.79	-1.19641	8.4262e-05	0.00091152	mettl9	12	992442	999800	-	2207	protein_coding	methyltransferase like 9 [Source:ZFIN;Acc:ZDB-GENE-061013-752]	-	156	103	285	321	2.08048	1.20116	3.41909	4.0849
ENSDARG00000041068	540.601	451.322	881.475	1392.65	495.961	1137.06	-1.19744	1.40622e-08	3.56769e-07	got2a	18	21178721	21188768	-	2573	protein_coding	glutamic-oxaloacetic transaminase 2a, mitochondrial [Source:ZFIN;Acc:ZDB-GENE-040426-2703]	Aminotran_1_2	505	483	915	1367	5.77687	4.8314	9.41563	14.9213
ENSDARG00000061985	1462.3	1250.25	3087.57	3132.69	1356.27	3110.13	-1.19808	1.46622e-22	1.84499e-20	rbm47	1	19353048	19402815	-	7235	protein_coding	RNA binding motif protein 47 [Source:ZFIN;Acc:ZDB-GENE-030131-9612]	RRM_1	1366	1338	3205	3075	5.55716	4.75974	11.7289	11.9367
ENSDARG00000094018	58.8773	110.261	203.269	186.433	84.5691	194.851	-1.19893	0.00081217	0.0063373	si:dkey-111e8.1	5	37982117	37997809	-	2212	protein_coding	si:dkey-111e8.1 [Source:ZFIN;Acc:ZDB-GENE-030131-2439]	-	55	118	211	183	0.731844	1.37297	2.5256	2.32351
ENSDARG00000037064	964.517	1060.56	2107.83	2544.87	1012.54	2326.35	-1.19943	5.14772e-18	4.30189e-16	galca	20	4769762	4793450	-	2809	protein_coding	galactosylceramidase a [Source:ZFIN;Acc:ZDB-GENE-040724-243]	-	901	1135	2188	2498	9.44091	10.3994	20.6236	24.9758
ENSDARG00000004930	574.856	468.141	1280.31	1112.49	521.499	1196.4	-1.19955	4.67452e-13	2.17763e-11	lmo7a	9	21893757	21970067	-	7151	protein_coding	LIM domain 7a [Source:ZFIN;Acc:ZDB-GENE-030219-74]	CH	537	501	1329	1092	2.21029	1.80317	4.92069	4.28878
ENSDARG00000095783	37.4674	35.5077	74.1788	93.7261	36.4875	83.9525	-1.20224	0.010084	0.0494486	si:dkey-249d8.1	6	49761229	49769100	-	3207	protein_coding	si:dkey-249d8.1 [Source:ZFIN;Acc:ZDB-GENE-110411-157]	-	35	38	77	92	0.321225	0.304965	0.635711	0.805689
ENSDARG00000089362	129.53	145.769	236.987	397.317	137.649	317.152	-1.20247	5.84723e-05	0.000659923	grn1	19	40186677	40192249	-	1618	protein_coding	granulin 1 [Source:ZFIN;Acc:ZDB-GENE-060103-1]	-	121	156	246	390	2.20114	2.48148	4.02554	6.76962
ENSDARG00000014517	459.243	382.175	913.266	1024.87	420.709	969.07	-1.20505	2.07156e-12	8.85874e-11	usp5	16	11965371	11986321	-	3324	protein_coding	ubiquitin specific peptidase 5 (isopeptidase T) [Source:ZFIN;Acc:ZDB-GENE-040426-2584]	UCH	429	409	948	1006	3.79872	3.16685	7.55119	8.49993
ENSDARG00000039974	239.791	261.636	537.556	619.407	250.714	578.481	-1.20512	1.49897e-09	4.40535e-08	rai14	21	19547806	19608698	+	6080	protein_coding	retinoic acid induced 14 [Source:ZFIN;Acc:ZDB-GENE-040718-235]	-	224	280	558	608	1.08439	1.18528	2.42996	2.80853
ENSDARG00000012944	276615	363752	710831	766218	320184	738525	-1.20574	1.31077e-22	1.65892e-20	myhz2	5	32206378	32217579	+	5990	protein_coding	myosin, heavy polypeptide 2, fast muscle specific [Source:ZFIN;Acc:ZDB-GENE-020604-1]	Myosin_head	258399	389284	737866	752107	1269.71	1672.65	3261.51	3526.4
ENSDARG00000075766	424.987	497.108	1112.68	1016.72	461.048	1064.7	-1.20635	1.1162e-13	5.52925e-12	sccpdha	17	12159529	12175772	+	1827	protein_coding	saccharopine dehydrogenase a [Source:ZFIN;Acc:ZDB-GENE-040718-51]	Saccharop_dh	397	532	1155	998	6.39577	7.49443	16.7383	15.3416
ENSDARG00000058462	1671.04	1802.48	4156.9	3861.11	1736.76	4009.01	-1.20656	2.88938e-27	4.98134e-25	zgc:158846	6	39336731	39344259	-	1917	protein_coding	zgc:158846 [Source:ZFIN;Acc:ZDB-GENE-070209-50]	Filament	1561	1929	4315	3790	23.9674	25.8985	59.5973	55.5259
ENSDARG00000017821	48.1723	57.9337	144.504	100.857	53.053	122.681	-1.20818	0.00291059	0.0184343	gata5	23	7379728	7391028	+	2310	protein_coding	GATA binding protein 5 [Source:ZFIN;Acc:ZDB-GENE-980526-340]	GATA-N	45	62	150	99	0.573378	0.690788	1.71928	1.20365
ENSDARG00000088263	348.982	393.388	788.993	928.092	371.185	858.542	-1.20849	8.93084e-12	3.5945e-10	zgc:174356	17	39242437	39316202	+	1833	protein_coding	zgc:174356 [Source:ZFIN;Acc:ZDB-GENE-080215-21]	-	326	421	819	911	5.23475	5.91133	11.8301	13.9584
ENSDARG00000105408	264.413	207.44	563.566	525.681	235.926	544.624	-1.20928	9.77026e-09	2.54364e-07	BX248082.1	16	16055484	16059808	+	1834	antisense	-	-	247	222	585	516	3.96404	3.11544	8.44548	7.90185
ENSDARG00000009160	450.679	467.207	938.314	1185.84	458.943	1062.08	-1.20992	1.74064e-12	7.48749e-11	kmo	13	42272515	42306348	-	2124	protein_coding	kynurenine 3-monooxygenase [Source:ZFIN;Acc:ZDB-GENE-030424-4]	FAD_binding_3	421	500	974	1164	5.83403	6.05872	12.1415	15.3914
ENSDARG00000101320	41.7493	56.0648	124.274	102.895	48.9071	113.584	-1.21275	0.00330636	0.0203981	si:dkey-50i6.5	21	2212645	2217685	-	2395	protein_coding	si:dkey-50i6.5 [Source:ZFIN;Acc:ZDB-GENE-081031-53]	-	39	60	129	101	0.479292	0.644779	1.42611	1.18439
ENSDARG00000005894	236.58	306.488	501.911	759.996	271.534	630.954	-1.21428	3.77515e-07	7.37351e-06	slc7a9	7	38507006	38527833	+	2327	protein_coding	solute carrier family 7 (amino acid transporter light chain, bo,+ system), member 9 [Source:ZFIN;Acc:ZDB-GENE-080116-2]	-	221	328	521	746	2.79535	3.62779	5.92801	9.0037
ENSDARG00000043667	55.6658	35.5077	124.274	86.5948	45.5868	105.434	-1.21504	0.00678229	0.036193	zgc:100997	20	10498704	10520821	+	3350	protein_coding	zgc:100997 [Source:ZFIN;Acc:ZDB-GENE-040801-124]	CH	52	38	129	85	0.456877	0.291947	1.01956	0.712611
ENSDARG00000103226	398.225	398.995	928.68	926.055	398.61	927.367	-1.21815	2.43321e-14	1.28684e-12	dhcr7	2	28648888	28682476	-	3978	protein_coding	7-dehydrocholesterol reductase [Source:ZFIN;Acc:ZDB-GENE-030912-9]	-	372	427	964	909	2.75245	2.76267	6.41623	6.41767
ENSDARG00000098911	55.6658	42.9831	101.153	128.364	49.3244	114.758	-1.22062	0.00304657	0.019117	zgc:153293	25	3507368	3518589	+	1298	protein_coding	zgc:153293 [Source:ZFIN;Acc:ZDB-GENE-060825-315]	-	52	46	105	126	1.17915	0.912113	2.14182	2.7263
ENSDARG00000103148	86.7102	76.622	184.002	196.621	81.6661	190.312	-1.22184	0.000110312	0.00114512	nectin4	2	58026496	58075414	-	2134	protein_coding	nectin cell adhesion molecule 4 [Source:ZFIN;Acc:ZDB-GENE-070912-114]	V-set	81	82	191	193	1.1172	0.988974	2.36977	2.54004
ENSDARG00000096317	31.0444	62.6057	97.2995	122.251	46.8251	109.775	-1.2222	0.00758838	0.0395971	CU571254.1	6	8691408	8691993	+	586	processed_pseudogene	-	-	29	67	101	120	1.4566	2.94268	4.56343	5.75125
ENSDARG00000028507	9623.76	13466.8	27087.8	26803.6	11545.3	26945.7	-1.2226	1.96352e-19	1.84512e-17	itgb4	8	13106760	13159587	+	9247	protein_coding	integrin, beta 4 [Source:ZFIN;Acc:ZDB-GENE-030131-7209]	fn3	8990	14412	28118	26310	28.6154	40.1133	80.5103	79.9095
ENSDARG00000057741	42.8198	56.9993	99.2262	134.477	49.9096	116.851	-1.22347	0.00321039	0.019907	nr1h4	18	15644559	15666942	+	2044	protein_coding	nuclear receptor subfamily 1, group H, member 4 [Source:ZFIN;Acc:ZDB-GENE-040718-313]	zf-C4	40	61	103	132	0.575997	0.768094	1.33421	1.81372
ENSDARG00000076602	655.144	741.925	1470.09	1795.06	698.534	1632.57	-1.22378	1.36873e-15	8.39452e-14	prss16	15	43286785	43327911	-	2169	protein_coding	protease, serine, 16 (thymus) [Source:ZFIN;Acc:ZDB-GENE-070112-732]	Peptidase_S28	612	794	1526	1762	8.30487	9.42163	18.6279	22.8152
ENSDARG00000074322	55.6658	109.326	197.489	189.49	82.4961	193.489	-1.22424	0.000802971	0.00627671	si:ch211-147m6.2	25	13191391	13194926	+	1972	protein_coding	si:ch211-147m6.2 [Source:ZFIN;Acc:ZDB-GENE-131121-85]	-	52	117	205	186	0.776135	1.52702	2.75242	2.64901
ENSDARG00000101471	59.9478	108.392	203.269	192.546	84.1699	197.908	-1.22824	0.000478117	0.00402821	fgd4a	18	12147971	12229524	+	3445	protein_coding	FYVE, RhoGEF and PH domain containing 4a [Source:ZFIN;Acc:ZDB-GENE-050420-347]	RhoGEF	56	116	211	189	0.478453	0.866631	1.62167	1.54082
ENSDARG00000097790	37.4674	44.8519	76.1055	117.158	41.1596	96.6316	-1.22834	0.00727313	0.0382341	si:dkey-234i14.6	25	37268900	37277392	+	1534	protein_coding	si:dkey-234i14.6 [Source:ZFIN;Acc:ZDB-GENE-131121-173]	-	35	48	79	115	0.671558	0.805343	1.36355	2.10548
ENSDARG00000031496	241.932	181.276	458.56	533.831	211.604	496.196	-1.23182	6.25525e-08	1.4219e-06	ap1ar	14	4796168	4814464	+	8196	protein_coding	adaptor-related protein complex 1 associated regulatory protein [Source:ZFIN;Acc:ZDB-GENE-130530-580]	-	226	194	476	524	0.81161	0.609207	1.5377	1.79559
ENSDARG00000035595	97.4151	117.736	225.427	281.178	107.576	253.302	-1.23306	2.13935e-05	0.000275641	ficd	5	20485624	20491272	-	2431	protein_coding	FIC domain containing [Source:ZFIN;Acc:ZDB-GENE-030131-6588]	Fic	91	126	234	276	1.10179	1.33398	2.54858	3.18862
ENSDARG00000075958	50.3133	78.4908	199.416	103.914	64.4021	151.665	-1.23306	0.00360013	0.0218351	si:dkey-266f7.9	19	8086491	8096984	-	1186	protein_coding	si:dkey-266f7.9 [Source:ZFIN;Acc:ZDB-GENE-070705-440]	PI-PLC-X	47	84	207	102	1.16642	1.82289	4.62119	2.41543
ENSDARG00000058218	78.1462	53.2616	149.321	158.927	65.7039	154.124	-1.23408	0.000696452	0.00554704	fam151a	2	11069055	11082914	-	2250	protein_coding	family with sequence similarity 151, member A [Source:ZFIN;Acc:ZDB-GENE-070705-105]	-	73	57	155	156	0.954951	0.652015	1.82397	1.94724
ENSDARG00000011652	47.1018	67.2778	157.028	113.083	57.1898	135.055	-1.23668	0.00186659	0.0127239	si:zfos-979f1.2	9	3153466	3166159	+	2404	protein_coding	si:zfos-979f1.2 [Source:ZFIN;Acc:ZDB-GENE-091204-441]	Pro_isomerase	44	72	163	111	0.538715	0.770838	1.79523	1.29678
ENSDARG00000011975	34.2559	47.6551	105.006	88.6323	40.9555	96.8193	-1.23783	0.00551154	0.0307688	fmn1	20	29436601	29469228	+	4244	protein_coding	formin 1 [Source:ZFIN;Acc:ZDB-GENE-041001-198]	FH2	32	51	109	87	0.22193	0.309286	0.680016	0.575734
ENSDARG00000054218	61.0183	60.7369	142.577	144.664	60.8776	143.621	-1.2383	0.000543246	0.00449014	si:ch73-269m23.5	23	44772661	44786844	-	1763	protein_coding	si:ch73-269m23.5 [Source:ZFIN;Acc:ZDB-GENE-110411-68]	-	57	65	148	142	0.95162	0.948913	2.22268	2.26211
ENSDARG00000017853	32.1149	59.8025	107.896	110.026	45.9587	108.961	-1.23906	0.00534985	0.0301041	prepl	13	10621257	10647310	+	2379	protein_coding	prolyl endopeptidase-like [Source:ZFIN;Acc:ZDB-GENE-090313-224]	-	30	64	112	108	0.371166	0.69239	1.2465	1.27499
ENSDARG00000079166	764.334	752.203	1740.79	1838.87	758.269	1789.83	-1.23908	1.71358e-21	1.97468e-19	ace	12	5530247	5582060	+	4260	protein_coding	angiotensin I converting enzyme (peptidyl-dipeptidase A) 1 [Source:ZFIN;Acc:ZDB-GENE-030131-1826]	Peptidase_M2	714	805	1807	1805	4.93321	4.86353	11.2309	11.9
ENSDARG00000073870	107.05	133.621	234.097	335.173	120.335	284.635	-1.23936	2.41268e-05	0.00030535	gdpd2	14	33219370	33265068	-	4023	protein_coding	glycerophosphodiester phosphodiesterase domain containing 2 [Source:ZFIN;Acc:ZDB-GENE-081107-62]	-	100	143	243	329	0.731629	0.914853	1.59928	2.29681
ENSDARG00000004754	2369.01	1835.19	5136.64	4807.54	2102.1	4972.09	-1.24275	5.37268e-21	5.94115e-19	hspa4a	21	43137500	43171249	-	3219	protein_coding	heat shock protein 4a [Source:ZFIN;Acc:ZDB-GENE-040426-2832]	HSP70	2213	1964	5332	4719	20.2349	15.7031	43.8568	41.1725
ENSDARG00000079302	3381.7	6190.49	11519.9	11212.5	4786.1	11366.2	-1.24776	0.00321009	0.019907	and2	2	31762852	31767827	-	2530	protein_coding	actinodin2 [Source:ZFIN;Acc:ZDB-GENE-041105-2]	-	3159	6625	11958	11006	36.7511	67.3955	125.143	122.176
ENSDARG00000054290	654.073	929.742	1878.55	1887.77	791.908	1883.16	-1.24816	5.39098e-14	2.74501e-12	acin1a	2	38197820	38225472	-	7500	protein_coding	apoptotic chromatin condensation inducer 1a [Source:ZFIN;Acc:ZDB-GENE-030616-583]	SAP	611	995	1950	1853	2.39784	3.4145	6.88401	6.93893
ENSDARG00000075191	59.9478	71.9499	157.028	156.889	65.9488	156.959	-1.24881	0.00033185	0.00294641	oacyl	21	10828828	10846928	+	2263	protein_coding	O-acyltransferase like [Source:ZFIN;Acc:ZDB-GENE-090710-2]	-	56	77	163	154	0.728357	0.875732	1.90709	1.91124
ENSDARG00000040920	118.825	112.13	293.825	254.691	115.477	274.258	-1.24889	3.94395e-06	6.19905e-05	si:dkey-49n23.1	22	30811775	30935510	-	3682	protein_coding	si:dkey-49n23.1 [Source:ZFIN;Acc:ZDB-GENE-050208-762]	Sema	111	120	305	250	0.887319	0.838808	2.19323	1.90693
ENSDARG00000029290	97.4151	142.965	235.06	338.229	120.19	286.645	-1.25011	4.51782e-05	0.000529175	stx11b.1	20	26538137	26541177	+	1556	protein_coding	syntaxin 11b, tandem duplicate 1 [Source:ZFIN;Acc:ZDB-GENE-040426-1893]	-	91	153	244	332	1.72136	2.53074	4.15191	5.99248
ENSDARG00000005972	255.849	212.112	460.487	653.026	233.98	556.757	-1.2516	7.51921e-08	1.67993e-06	ric8b	18	15287065	15329471	-	2937	protein_coding	RIC8 guanine nucleotide exchange factor B [Source:ZFIN;Acc:ZDB-GENE-030131-6435]	-	239	227	478	641	2.39516	1.98924	4.30915	6.1296
ENSDARG00000079420	551.305	716.696	1490.32	1536.29	634.001	1513.31	-1.2535	2.4616e-15	1.46361e-13	dpp4	22	11628438	11648322	-	3362	protein_coding	dipeptidyl-peptidase 4 [Source:ZFIN;Acc:ZDB-GENE-081104-277]	-	515	767	1547	1508	4.50869	5.87169	12.1832	12.5974
ENSDARG00000104181	1689.24	1727.73	4359.21	3789.79	1708.49	4074.5	-1.25392	4.91532e-27	8.27853e-25	tmsb1	14	12066695	12071679	-	1053	protein_coding	thymosin beta 1 [Source:ZFIN;Acc:ZDB-GENE-030131-8575]	-	1578	1849	4525	3720	44.1082	45.1933	113.778	99.2186
ENSDARG00000044642	367.18	282.193	841.014	706.002	324.687	773.508	-1.25464	2.18791e-10	7.34727e-09	sc5d	21	24531679	24535510	-	1291	protein_coding	sterol-C5-desaturase [Source:ZFIN;Acc:ZDB-GENE-040912-56]	-	343	302	873	693	7.82003	6.02069	17.9042	15.076
ENSDARG00000069953	69.5822	49.5239	155.101	128.364	59.5531	141.733	-1.2551	0.000935394	0.00713356	kcnq5b	1	31134942	31350148	-	4129	protein_coding	potassium voltage-gated channel, KQT-like subfamily, member 5b [Source:ZFIN;Acc:ZDB-GENE-090312-178]	Ion_trans	65	53	161	126	0.46335	0.330367	1.0324	0.857046
ENSDARG00000055481	82.4282	114.933	210.013	262.841	98.6806	236.427	-1.25679	4.91189e-05	0.000568632	atf7b	6	39613357	39631181	-	3487	protein_coding	activating transcription factor 7b [Source:ZFIN;Acc:ZDB-GENE-030131-3028]	bZIP_1	77	123	218	258	0.649949	0.907859	1.65528	2.078
ENSDARG00000017320	218.381	258.833	709.034	431.955	238.607	570.494	-1.25706	6.73283e-07	1.24611e-05	f11r.1	5	29831195	29848772	+	1886	protein_coding	F11 receptor, tandem duplicate 1 [Source:ZFIN;Acc:ZDB-GENE-030131-2416]	V-set	204	277	736	424	3.18368	3.7801	10.3325	6.31397
ENSDARG00000004059	175.561	196.227	421.952	469.649	185.894	445.801	-1.26052	1.10119e-08	2.83988e-07	galk2	25	32390794	32400209	+	1973	protein_coding	galactokinase 2 [Source:ZFIN;Acc:ZDB-GENE-041114-143]	GHMP_kinases	164	210	438	461	2.44657	2.73941	5.8778	6.56224
ENSDARG00000076294	177.702	226.128	481.681	487.987	201.915	484.834	-1.26135	9.23985e-09	2.40841e-07	klb	14	740032	750043	+	2988	protein_coding	klotho beta [Source:ZFIN;Acc:ZDB-GENE-110909-4]	Glyco_hydro_1	166	242	500	479	1.63519	2.08449	4.43055	4.50229
ENSDARG00000074393	90.9922	110.261	273.595	210.884	100.627	242.239	-1.26593	2.45979e-05	0.000310416	sh3yl1	17	30604819	30652738	-	1986	protein_coding	SH3 and SYLF domain containing 1 [Source:ZFIN;Acc:ZDB-GENE-040128-16]	SH3_1	85	118	284	207	1.25974	1.52921	3.78623	2.92731
ENSDARG00000099877	96.3446	111.195	276.485	223.109	103.77	249.797	-1.26626	1.27284e-05	0.000174076	si:dkeyp-72e1.6	3	36605149	36606884	-	832	protein_coding	si:dkeyp-72e1.6 [Source:ZFIN;Acc:ZDB-GENE-120215-228]	-	90	119	287	219	3.1839	3.6812	9.13327	7.39263
ENSDARG00000071425	47.1018	55.1304	91.5193	154.852	51.1161	123.186	-1.26633	0.00289318	0.0183346	nat9	12	31789379	31794940	-	1384	protein_coding	N-acetyltransferase 9 (GCN5-related, putative) [Source:ZFIN;Acc:ZDB-GENE-030131-5097]	-	44	59	95	152	0.935745	1.09719	1.81742	3.08451
ENSDARG00000096505	169.138	181.276	455.67	388.148	175.207	421.909	-1.26747	2.65843e-08	6.41745e-07	si:ch73-103l1.2	12	10179452	10193551	+	786	protein_coding	si:ch73-103l1.2 [Source:ZFIN;Acc:ZDB-GENE-121214-226]	-	158	194	473	381	5.91664	6.3525	15.9333	13.6138
ENSDARG00000035324	418.564	463.469	1025.02	1102.3	441.017	1063.66	-1.26912	9.93015e-16	6.21202e-14	hnrnpl	5	36899691	36911903	+	2390	protein_coding	heterogeneous nuclear ribonucleoprotein L [Source:ZFIN;Acc:ZDB-GENE-040426-710]	RRM_1	391	496	1064	1082	4.81526	5.34133	11.7872	12.7147
ENSDARG00000060771	329.713	257.898	658.939	756.94	293.806	707.94	-1.2706	1.44253e-10	4.95826e-09	map7d3	14	31668510	31715412	-	4931	protein_coding	MAP7 domain containing 3 [Source:ZFIN;Acc:ZDB-GENE-121129-3]	-	308	276	684	743	1.83847	1.44059	3.67273	4.23187
ENSDARG00000096304	43.8903	75.6875	149.321	140.589	59.7889	144.955	-1.27223	0.00113047	0.00838188	btr31	23	46183410	46190073	+	1439	protein_coding	bloodthirsty-related gene family, member 31 [Source:ZFIN;Acc:ZDB-GENE-090512-3]	SPRY	41	81	155	138	0.838617	1.44874	2.85193	2.69337
ENSDARG00000058944	109.191	142.965	313.092	298.497	126.078	305.795	-1.27549	1.68711e-06	2.85466e-05	si:dkey-8e10.3	8	10033326	10048059	-	1115	protein_coding	si:dkey-8e10.3 [Source:ZFIN;Acc:ZDB-GENE-081104-442]	Pkinase	102	153	325	293	2.69256	3.53168	7.7175	7.38025
ENSDARG00000040566	135.953	139.228	332.36	334.154	137.59	333.257	-1.27597	1.80552e-07	3.76493e-06	phykpl	15	23443665	23451449	+	1919	protein_coding	5-phosphohydroxy-L-lysine phospho-lyase [Source:ZFIN;Acc:ZDB-GENE-051127-33]	Aminotran_3	127	149	345	328	1.94791	1.99837	4.76006	4.8004
ENSDARG00000036252	153.081	74.7531	295.752	254.691	113.917	275.221	-1.27801	0.000152749	0.00151607	rras2	7	27834130	27887883	+	4832	protein_coding	RAS related 2 [Source:ZFIN;Acc:ZDB-GENE-050417-352]	Ras	143	80	307	250	0.871064	0.426116	1.68221	1.45309
ENSDARG00000061120	829.634	730.712	1978.74	1803.21	780.173	1890.98	-1.27823	1.15687e-20	1.26018e-18	slc43a2b	10	24371921	24391716	-	4637	protein_coding	solute carrier family 43 (amino acid system L transporter), member 2b [Source:ZFIN;Acc:ZDB-GENE-041212-6]	MFS_1	775	782	2054	1770	4.91932	4.34045	11.7282	10.7205
ENSDARG00000023815	93.1332	72.8843	205.196	197.64	83.0087	201.418	-1.28175	4.88595e-05	0.000567221	uvrag	10	32264857	32494499	-	2720	protein_coding	UV radiation resistance associated gene [Source:ZFIN;Acc:ZDB-GENE-040426-924]	-	87	78	213	194	0.941437	0.738059	2.07338	2.00314
ENSDARG00000075905	138.094	122.408	251.437	382.036	130.251	316.737	-1.28238	7.75205e-06	0.000112554	si:ch211-266g18.9	17	15580665	15600552	-	2992	protein_coding	si:ch211-266g18.9 [Source:ZFIN;Acc:ZDB-GENE-131127-382]	CNH	129	131	261	375	1.26902	1.12687	2.30965	3.52004
ENSDARG00000054304	50.3133	62.6057	131.98	143.645	56.4595	137.813	-1.28462	0.000588691	0.00480768	homeza	2	38271392	38275658	+	2117	protein_coding	homeobox and leucine zipper encoding a [Source:ZFIN;Acc:ZDB-GENE-030616-592]	Homeobox	47	67	137	141	0.653458	0.814553	1.71344	1.87058
ENSDARG00000098081	72.7937	65.409	161.845	175.227	69.1014	168.536	-1.28738	0.000131155	0.00133193	FO704905.1	17	53273684	53282539	-	1541	protein_coding	-	Neur_chan_LBD	68	70	168	172	1.29881	1.16912	2.88652	3.13476
ENSDARG00000093671	424.987	405.536	948.911	1079.89	415.261	1014.4	-1.28873	2.30735e-15	1.3795e-13	BX001030.1	24	38098896	38099675	-	708	unprocessed_pseudogene	-	-	397	434	985	1060	16.5043	15.7769	36.8359	42.0485
ENSDARG00000077911	44.9608	28.9668	86.7025	93.7261	36.9638	90.2143	-1.29217	0.00573008	0.0317299	treh	18	43846936	43866526	-	2208	protein_coding	trehalase (brush-border membrane glycoprotein) [Source:ZFIN;Acc:ZDB-GENE-070912-84]	-	42	31	90	92	0.559875	0.36135	1.07922	1.17022
ENSDARG00000016479	238.721	289.668	743.715	553.188	264.195	648.451	-1.29431	2.20299e-09	6.24798e-08	ugt5a1	25	29407671	29415382	-	1960	protein_coding	UDP glucuronosyltransferase 5 family, polypeptide A1 [Source:ZFIN;Acc:ZDB-GENE-051120-60]	UDPGT	223	310	772	543	3.3488	4.07072	10.4287	7.78076
ENSDARG00000105465	137.023	134.556	369.931	296.46	135.79	333.195	-1.29564	4.23496e-07	8.16955e-06	BX005228.1	14	24278047	24283719	+	1633	processed_transcript	-	RRM_1	128	144	384	291	2.30709	2.26956	6.22606	5.00478
ENSDARG00000094557	1408.77	1608.13	4156.9	3250.87	1508.45	3703.89	-1.29567	3.49561e-20	3.62732e-18	nupr1	3	15505275	15506158	+	794	protein_coding	nuclear protein 1 [Source:ZFIN;Acc:ZDB-GENE-030131-4653]	-	1316	1721	4315	3191	48.7839	55.7861	143.889	112.872
ENSDARG00000110341	67.4413	68.2122	137.761	195.602	67.8267	166.681	-1.2963	0.000269794	0.00247471	hsd11b1lb	2	53459873	53481912	-	846	protein_coding	hydroxysteroid (11-beta) dehydrogenase 1-like b [Source:ZFIN;Acc:ZDB-GENE-101130-4]	adh_short	63	73	143	192	2.19185	2.22084	4.47542	6.37396
ENSDARG00000038700	50.3133	56.9993	140.651	123.27	53.6563	131.96	-1.29708	0.000638314	0.00515905	gpr160	2	37295088	37296159	+	1072	protein_coding	G protein-coupled receptor 160 [Source:ZFIN;Acc:ZDB-GENE-081022-189]	-	47	61	146	121	1.29046	1.46454	3.606	3.17007
ENSDARG00000025074	575.927	539.157	1411.32	1328.47	557.542	1369.89	-1.29756	1.62808e-19	1.55663e-17	slc25a10	1	56421754	56435182	-	2890	protein_coding	solute carrier family 25 (mitochondrial carrier; dicarboxylate transporter), member 10 [Source:ZFIN;Acc:ZDB-GENE-040426-1095]	Mito_carr	538	577	1465	1304	5.4793	5.13858	13.4217	12.6724
ENSDARG00000079979	87.7807	134.556	226.39	321.929	111.168	274.159	-1.29804	3.82064e-05	0.000456122	fam89a	20	4026408	4031475	-	1011	protein_coding	family with sequence similarity 89, member A [Source:ZFIN;Acc:ZDB-GENE-111019-1]	-	82	144	235	316	2.38728	3.66587	6.15438	8.77838
ENSDARG00000058556	793.238	912.923	2262.94	1934.63	853.08	2098.78	-1.29815	5.121e-20	5.09656e-18	muc5.2	25	8407892	8445400	+	18751	protein_coding	mucin 5.2 [Source:ZFIN;Acc:ZDB-GENE-121108-1]	VWD	741	977	2349	1899	1.16315	1.34102	3.31686	2.84432
ENSDARG00000086623	41.7493	60.7369	155.101	97.8012	51.2431	126.451	-1.30022	0.00223253	0.0147544	vav3a	24	29563767	29586082	-	505	protein_coding	vav 3 guanine nucleotide exchange factor a [Source:ZFIN;Acc:ZDB-GENE-091204-266]	SH2	39	65	161	96	2.27308	3.31274	8.44117	5.33898
ENSDARG00000096533	232.298	174.735	506.728	494.1	203.517	500.414	-1.30073	4.96053e-09	1.34253e-07	rltgr	12	6158225	6159545	-	1321	protein_coding	RAMP-like triterpene glycoside receptor [Source:ZFIN;Acc:ZDB-GENE-100727-4]	-	217	187	526	485	4.83501	3.64338	10.5427	10.3114
ENSDARG00000061274	163.786	142.031	402.685	350.454	152.908	376.57	-1.30207	6.32559e-08	1.43522e-06	lss	9	38481780	38500391	+	2565	protein_coding	lanosterol synthase (2,3-oxidosqualene-lanosterol cyclase) [Source:ZFIN;Acc:ZDB-GENE-050119-7]	-	153	152	418	344	1.75568	1.52518	4.31476	3.7666
ENSDARG00000009401	1355.25	1980.96	4051.9	4181	1668.1	4116.45	-1.30225	7.68153e-17	5.46062e-15	vcanb	10	43188678	43263885	+	7027	protein_coding	versican b [Source:ZFIN;Acc:ZDB-GENE-030131-2185]	Xlink	1266	2120	4206	4104	5.30279	7.76482	15.8477	16.4027
ENSDARG00000052376	78.1462	76.622	217.72	164.021	77.3841	190.87	-1.30331	7.76619e-05	0.000848506	b3gnt2a	1	53475074	53476758	-	1685	protein_coding	UDP-GlcNAc:betaGal beta-1,3-N-acetylglucosaminyltransferase 2a [Source:ZFIN;Acc:ZDB-GENE-090312-192]	Galactosyl_T	73	82	226	161	1.27516	1.2525	3.55121	2.68352
ENSDARG00000051762	2651.62	1646.44	5780.17	4830.97	2149.03	5305.57	-1.30401	0.000295449	0.00266592	DNAJA4	25	34662358	34670413	-	1134	protein_coding	DnaJ heat shock protein family (Hsp40) member A4 [Source:HGNC Symbol;Acc:HGNC:14885]	DnaJ_C	2477	1762	6000	4742	64.2915	39.9906	140.09	117.443
ENSDARG00000089767	168.068	185.948	473.974	401.392	177.008	437.683	-1.30534	8.85626e-09	2.31393e-07	rnf130	14	36765612	36863432	-	3054	protein_coding	ring finger protein 130 [Source:ZFIN;Acc:ZDB-GENE-050522-525]	-	157	199	492	394	1.51311	1.67706	4.26544	3.62331
ENSDARG00000020952	1708.51	1536.18	3722.43	4308.34	1622.34	4015.39	-1.30779	1.24689e-26	2.06824e-24	si:ch211-214j8.1	5	26248380	26261125	+	2853	protein_coding	si:ch211-214j8.1 [Source:ZFIN;Acc:ZDB-GENE-060526-100]	TFR_dimer	1596	1644	3864	4229	16.4654	14.8308	35.8594	41.6308
ENSDARG00000058775	44.9608	99.0479	195.562	163.002	72.0044	179.282	-1.30999	0.000964389	0.00731646	2002-10-01	17	6331994	6349044	-	1996	protein_coding	organic cation transporter 2 [Source:ZFIN;Acc:ZDB-GENE-080204-92]	Sugar_tr	42	106	203	160	0.619341	1.36682	2.6928	2.25132
ENSDARG00000028618	964.517	1028.79	2905.5	2037.52	996.653	2471.51	-1.31021	1.55656e-15	9.46693e-14	zgc:77517	6	39360377	39365467	+	1889	protein_coding	zgc:77517 [Source:ZFIN;Acc:ZDB-GENE-040426-1508]	Filament	901	1101	3016	2000	14.0389	15.001	42.2734	29.7356
ENSDARG00000098538	280.47	453.191	1067.4	756.94	366.83	912.172	-1.31221	2.87623e-08	6.92795e-07	CABZ01112049.1	KN150189.1	3	9866	+	2871	protein_coding	-	VWD	262	485	1108	743	2.68602	4.34784	10.2182	7.26832
ENSDARG00000075543	138.094	204.637	408.465	449.274	171.365	428.87	-1.31982	1.30023e-07	2.78558e-06	chd8	2	38087413	38117538	-	8826	protein_coding	chromodomain helicase DNA binding protein 8 [Source:ZFIN;Acc:ZDB-GENE-030131-6320]	SNF2_N	129	219	424	441	0.430196	0.638624	1.27195	1.40331
ENSDARG00000103503	324.36	372.831	895.926	846.591	348.596	871.259	-1.32034	1.4789e-14	7.99518e-13	dgat1a	19	1370504	1393308	+	2730	protein_coding	diacylglycerol O-acyltransferase 1a [Source:ZFIN;Acc:ZDB-GENE-030131-4600]	MBOAT	303	399	930	831	3.26679	3.76163	9.01962	8.54903
ENSDARG00000001897	5803.16	5691.52	12585.3	16123.9	5747.34	14354.6	-1.32053	1.93604e-27	3.41645e-25	man2b1	11	31258116	31276080	-	3517	protein_coding	mannosidase, alpha, class 2B, member 1 [Source:ZFIN;Acc:ZDB-GENE-050327-52]	-	5421	6091	13064	15827	45.3678	44.574	98.3494	126.388
ENSDARG00000112419	537.389	1093.26	2183.94	1891.84	815.327	2037.89	-1.3213	0.0083265	0.0426952	si:ch211-62a1.3	13	45709380	45774815	+	5585	protein_coding	si:ch211-62a1.3 [Source:ZFIN;Acc:ZDB-GENE-061207-41]	VWA	502	1170	2267	1857	2.64558	5.39173	10.7472	9.33828
ENSDARG00000060415	131.671	87.8349	240.84	306.647	109.753	273.744	-1.32197	1.28782e-05	0.000175572	arhgef28	5	34827614	34964830	-	8667	protein_coding	Rho guanine nucleotide exchange factor (GEF) 28 [Source:ZFIN;Acc:ZDB-GENE-060531-28]	RhoGEF	123	94	250	301	0.417712	0.279141	0.763729	0.975385
ENSDARG00000055108	59.9478	66.3434	155.101	160.964	63.1456	158.033	-1.32213	0.00014139	0.00142398	gde1	22	26839241	26852516	-	2135	protein_coding	glycerophosphodiester phosphodiesterase 1 [Source:ZFIN;Acc:ZDB-GENE-040426-881]	-	56	71	161	158	0.772024	0.855905	1.99662	2.07844
ENSDARG00000073845	360.757	395.257	1019.24	872.06	378.007	945.648	-1.32234	1.13825e-14	6.21495e-13	zgc:110843	14	7902374	7917861	+	2991	protein_coding	zgc:110843 [Source:ZFIN;Acc:ZDB-GENE-050327-15]	-	337	423	1058	856	3.3163	3.6399	9.36563	8.03777
ENSDARG00000102868	76.0052	80.3596	200.379	191.527	78.1824	195.953	-1.32502	2.40926e-05	0.000305094	SPINK2	14	15331486	15332339	+	505	protein_coding	si:dkey-203a12.4 [Source:ZFIN;Acc:ZDB-GENE-141216-169]	-	71	86	208	188	4.13816	4.38301	10.9054	10.4555
ENSDARG00000041848	207.676	332.651	631.002	727.396	270.164	679.199	-1.32672	1.06551e-08	2.75111e-07	rh50	8	37259398	37263524	-	1749	protein_coding	Rh50-like protein [Source:ZFIN;Acc:ZDB-GENE-000427-1]	Ammonium_transp	194	356	655	714	3.26477	5.23872	9.91561	11.4653
ENSDARG00000010936	3151.54	3626.46	8167.38	8840.82	3389	8504.1	-1.32692	6.18729e-34	1.65208e-31	abcb4	16	28629242	28658341	-	4032	protein_coding	ATP-binding cassette, sub-family B (MDR/TAP), member 4 [Source:ZFIN;Acc:ZDB-GENE-080204-52]	ABC_membrane	2944	3881	8478	8678	21.4911	24.7736	55.6725	60.4474
ENSDARG00000067729	49.2428	71.0155	102.116	200.696	60.1291	151.406	-1.32803	0.00179083	0.0123038	arid3c	5	41322783	41447128	+	2479	protein_coding	AT rich interactive domain 3C (BRIGHT-like) [Source:ZFIN;Acc:ZDB-GENE-060526-12]	ARID	46	76	106	197	0.546163	0.789046	1.13213	2.23187
ENSDARG00000101407	24.6214	37.3766	73.2154	83.5385	30.999	78.377	-1.33293	0.00773556	0.0402865	tgm1l4	23	46191873	46201008	-	2310	protein_coding	transglutaminase 1 like 4 [Source:ZFIN;Acc:ZDB-GENE-050913-29]	Transglut_core	23	40	76	82	0.29306	0.44567	0.871103	0.996966
ENSDARG00000102937	249.426	187.817	598.247	502.25	218.621	550.248	-1.33444	2.16498e-09	6.15612e-08	hspbp1	3	13600714	13618382	+	1877	protein_coding	HSPA (heat shock 70kDa) binding protein, cytoplasmic cochaperone 1 [Source:ZFIN;Acc:ZDB-GENE-030219-55]	-	233	201	621	493	3.6537	2.75611	8.75982	7.37668
ENSDARG00000017931	31.0444	28.0324	61.6551	87.6135	29.5384	74.6343	-1.33769	0.00877349	0.0444894	ints6l	14	31566517	31608159	+	3149	protein_coding	integrator complex subunit 6 like [Source:ZFIN;Acc:ZDB-GENE-040426-1150]	-	29	30	64	86	0.27106	0.245196	0.538115	0.767015
ENSDARG00000071565	147.728	127.08	350.663	345.36	137.404	348.012	-1.34246	4.64184e-08	1.07662e-06	hnf4g	24	23646644	23675446	-	3490	protein_coding	hepatocyte nuclear factor 4, gamma [Source:ZFIN;Acc:ZDB-GENE-060929-100]	Hormone_recep	138	136	364	339	1.16384	1.00295	2.76149	2.72805
ENSDARG00000051939	188.407	209.309	490.351	523.644	198.858	506.997	-1.34896	1.14243e-10	3.98938e-09	pcxb	7	60457138	60831105	-	5842	protein_coding	pyruvate carboxylase b [Source:ZFIN;Acc:ZDB-GENE-000831-1]	CPSase_L_D2	176	224	509	514	0.886731	0.986851	2.30688	2.47104
ENSDARG00000024540	294.386	337.324	779.359	833.347	315.855	806.353	-1.35072	2.40433e-14	1.27464e-12	tspan36	8	29726620	29734951	+	1496	protein_coding	tetraspanin 36 [Source:ZFIN;Acc:ZDB-GENE-040718-248]	Tetraspannin	275	361	809	818	5.41056	6.2107	14.3181	15.3568
ENSDARG00000011573	53.5248	93.4414	186.892	189.49	73.4831	188.191	-1.35116	0.0001518	0.0015087	abcb11a	9	48755638	48817119	+	5051	protein_coding	ATP-binding cassette, sub-family B (MDR/TAP), member 11a [Source:ZFIN;Acc:ZDB-GENE-050517-13]	ABC_membrane	50	100	194	186	0.291362	0.509551	1.01693	1.03422
ENSDARG00000018621	73.8642	76.622	229.28	154.852	75.2431	192.066	-1.35235	7.85805e-05	0.000856704	slc6a19a.1	19	663796	677713	-	3908	protein_coding	solute carrier family 6 (neutral amino acid transporter), member 19a, tandem duplicate 1 [Source:ZFIN;Acc:ZDB-GENE-070620-2]	SNF	69	82	238	152	0.519679	0.540038	1.61247	1.09236
ENSDARG00000101800	105.979	81.294	278.411	198.659	93.6366	238.535	-1.35237	1.95377e-05	0.00025539	CABZ01088271.1	KN150631.1	15268	17625	+	1059	protein_coding	-	-	99	87	289	195	2.75157	2.11441	7.22553	5.17151
ENSDARG00000005565	248.355	327.045	888.219	585.788	287.7	737.004	-1.35584	6.59763e-09	1.75097e-07	entpd8	6	41038757	41060423	+	6278	protein_coding	ectonucleoside triphosphate diphosphohydrolase 8 [Source:ZFIN;Acc:ZDB-GENE-040724-142]	-	232	350	922	575	1.0877	1.43487	3.88846	2.57232
ENSDARG00000112049	203.394	270.046	588.614	625.52	236.72	607.067	-1.35598	9.9442e-11	3.47809e-09	cldn15a	7	20826240	20836625	-	5587	protein_coding	claudin 15a [Source:ZFIN;Acc:ZDB-GENE-040426-1305]	-	190	289	611	614	1.00096	1.33133	2.89555	3.08651
ENSDARG00000011956	39.6084	27.098	85.7391	84.5572	33.3532	85.1482	-1.35683	0.00458517	0.0266646	dlx4a	3	34670076	34681421	+	1195	protein_coding	distal-less homeobox 4a [Source:ZFIN;Acc:ZDB-GENE-980526-73]	Homeobox	37	29	89	83	0.911328	0.62459	1.97192	1.95069
ENSDARG00000102986	277.258	551.304	957.581	1168.52	414.281	1063.05	-1.35883	0.00601365	0.0329914	csf1ra	14	3143337	3180947	-	3685	protein_coding	colony stimulating factor 1 receptor, a [Source:ZFIN;Acc:ZDB-GENE-001205-1]	Pkinase_Tyr	259	590	994	1147	2.06873	4.12078	7.14195	8.74187
ENSDARG00000034409	86.7102	85.0317	272.631	168.096	85.8709	220.363	-1.36068	5.26057e-05	0.000603986	pik3r3b	6	33537267	33558977	+	7998	protein_coding	phosphoinositide-3-kinase, regulatory subunit 3b (gamma) [Source:ZFIN;Acc:ZDB-GENE-040426-743]	SH2	81	91	283	165	0.298088	0.292837	0.936856	0.579403
ENSDARG00000042027	557.728	698.007	1617.48	1611.68	627.868	1614.58	-1.36111	2.12142e-19	1.98498e-17	prrx1b	20	34511678	34521041	+	2828	protein_coding	paired related homeobox 1b [Source:ZFIN;Acc:ZDB-GENE-030131-9033]	Homeobox	521	747	1679	1582	5.42249	6.7984	15.7195	15.7111
ENSDARG00000086628	33.1854	25.2292	70.3254	79.4634	29.2073	74.8944	-1.3617	0.00692131	0.0367197	stk19	3	56601829	56617097	-	1179	protein_coding	serine/threonine kinase 19 [Source:ZFIN;Acc:ZDB-GENE-000616-11]	-	31	27	73	78	0.773907	0.589407	1.63937	1.85806
ENSDARG00000104188	48.1723	85.9661	180.149	166.058	67.0692	173.103	-1.36229	0.000249388	0.00231567	fam83fb	6	414653	426041	-	2579	protein_coding	family with sequence similarity 83, member Fb [Source:ZFIN;Acc:ZDB-GENE-041114-194]	-	45	92	187	163	0.513573	0.918125	1.91981	1.77507
ENSDARG00000076176	176.632	138.293	415.209	393.242	157.463	404.225	-1.36285	1.11646e-08	2.87588e-07	ptcd1	1	8555323	8566567	-	2344	protein_coding	pentatricopeptide repeat domain 1 [Source:ZFIN;Acc:ZDB-GENE-030131-6146]	-	165	148	431	386	2.07189	1.62506	4.86842	4.62496
ENSDARG00000061797	43.8903	35.5077	84.7758	119.195	39.699	101.985	-1.36296	0.00229023	0.0150494	zgc:154006	2	24386453	24403153	-	2761	protein_coding	zgc:154006 [Source:ZFIN;Acc:ZDB-GENE-061013-134]	-	41	38	88	117	0.437077	0.354228	0.843887	1.19014
ENSDARG00000022944	32.1149	38.311	79.959	101.876	35.2129	90.9176	-1.3657	0.00315903	0.0196553	ecd	17	20188704	20202725	-	2258	protein_coding	ecdysoneless homolog (Drosophila) [Source:ZFIN;Acc:ZDB-GENE-030131-6304]	SGT1	30	41	83	100	0.391055	0.467332	0.973245	1.24381
ENSDARG00000036834	4541.04	5171.05	12012.1	13034	4856.05	12523.1	-1.36647	1.33883e-38	4.873e-36	krt92	19	5349656	5352199	-	1995	protein_coding	keratin 92 [Source:ZFIN;Acc:ZDB-GENE-050417-363]	Filament	4242	5534	12469	12794	62.5848	71.394	165.484	180.112
ENSDARG00000036832	692.611	890.497	1984.52	2108.84	791.554	2046.68	-1.36907	3.71212e-20	3.83381e-18	cyt1l	19	5356421	5358455	-	1561	protein_coding	type I cytokeratin, enveloping layer, like [Source:ZFIN;Acc:ZDB-GENE-061026-4]	Filament	647	953	2060	2070	12.1995	15.7129	34.9408	37.2431
ENSDARG00000043976	317.937	462.535	928.68	1094.15	390.236	1011.42	-1.37144	5.78485e-12	2.37635e-10	etf1b	10	21434649	21444731	+	5146	protein_coding	eukaryotic translation termination factor 1b [Source:ZFIN;Acc:ZDB-GENE-021029-1]	-	297	495	964	1074	1.69874	2.47572	4.95993	5.86156
ENSDARG00000070835	48.1723	34.5733	113.677	99.8387	41.3728	106.758	-1.37191	0.00148808	0.0105476	tnnc2	23	20422661	20427299	+	1531	protein_coding	troponin C type 2 (fast) [Source:ZFIN;Acc:ZDB-GENE-000322-2]	-	45	37	118	98	0.865124	0.622002	2.04068	1.79775
ENSDARG00000004753	78.1462	177.539	322.726	343.323	127.842	333.024	-1.37593	4.07799e-05	0.000483681	mylkb	6	13458257	13498745	-	3594	protein_coding	myosin light chain kinase b [Source:ZFIN;Acc:ZDB-GENE-041111-150]	Pkinase	73	190	335	337	0.597841	1.36063	2.46794	2.63348
ENSDARG00000023151	2404.33	3780.64	8315.73	7761.95	3092.49	8038.84	-1.37808	2.12322e-05	0.000274301	ucp1	1	53374454	53388914	+	3098	protein_coding	uncoupling protein 1 [Source:ZFIN;Acc:ZDB-GENE-010503-1]	Mito_carr	2246	4046	8632	7619	21.3388	33.6132	73.7731	69.0709
ENSDARG00000019239	41.7493	42.0486	105.006	113.083	41.899	109.044	-1.37966	0.00091873	0.00703097	cul1a	2	50229183	50272077	-	3711	protein_coding	cullin 1a [Source:ZFIN;Acc:ZDB-GENE-030131-2603]	Cullin	39	45	109	111	0.309325	0.312095	0.777685	0.84006
ENSDARG00000035868	102.768	101.851	277.448	255.709	102.309	266.579	-1.38192	5.03209e-07	9.58065e-06	spire1a	19	32979132	33072157	+	4029	protein_coding	spire-type actin nucleation factor 1a [Source:ZFIN;Acc:ZDB-GENE-061013-119]	-	96	109	288	251	0.701318	0.696297	1.89262	1.74966
ENSDARG00000077038	207.676	165.391	471.084	501.231	186.534	486.157	-1.38424	4.14791e-10	1.3336e-08	pbrm1l	6	46406565	46431597	+	6348	protein_coding	polybromo 1, like [Source:ZFIN;Acc:ZDB-GENE-010501-3]	BAH	194	177	489	492	0.899509	0.717632	2.03958	2.17674
ENSDARG00000056719	818.929	1125.97	2958.48	2125.14	972.449	2541.81	-1.38534	2.06383e-14	1.10483e-12	slc6a19b	16	18974064	18998549	+	2538	protein_coding	solute carrier family 6 (neutral amino acid transporter), member 19b [Source:ZFIN;Acc:ZDB-GENE-030131-4755]	SNF	765	1205	3071	2086	8.87178	12.2197	32.0373	23.0835
ENSDARG00000099465	908.851	1015.71	2391.06	2639.61	962.28	2515.34	-1.38543	3.92221e-27	6.65712e-25	rnf213a	3	56699187	56813923	+	16192	protein_coding	ring finger protein 213a [Source:ZFIN;Acc:ZDB-GENE-050302-100]	-	849	1087	2482	2591	1.54329	1.7278	4.05853	4.49413
ENSDARG00000099154	252.637	206.506	545.262	653.026	229.571	599.144	-1.38556	4.70342e-11	1.7221e-09	CABZ01032488.1	KN149764.1	4168	17479	-	1952	protein_coding	-	Aldedh	236	221	566	641	3.55855	2.91392	7.67723	9.22267
ENSDARG00000074806	62.0888	98.1135	195.562	225.146	80.1011	210.354	-1.38792	3.42681e-05	0.000414989	afap1l2	12	30233977	30308351	+	4204	protein_coding	actin filament associated protein 1-like 2 [Source:ZFIN;Acc:ZDB-GENE-100318-1]	PH	58	105	203	221	0.406075	0.642824	1.2785	1.47641
ENSDARG00000052705	299.739	381.241	977.812	806.86	340.49	892.336	-1.38836	3.36219e-13	1.58653e-11	pkp1b	6	54711306	54754042	+	2833	protein_coding	plakophilin 1b [Source:ZFIN;Acc:ZDB-GENE-030131-417]	Arm	280	408	1015	792	2.90906	3.70663	9.48609	7.85158
ENSDARG00000051851	108.12	56.0648	251.437	177.265	82.0925	214.351	-1.39062	0.000177386	0.00172693	ctu2	7	55292959	55325712	+	1799	protein_coding	cytosolic thiouridylase subunit 2 homolog (S. pombe) [Source:ZFIN;Acc:ZDB-GENE-040801-79]	-	101	60	261	174	1.65246	0.858391	3.84129	2.71642
ENSDARG00000099747	107.05	85.9661	235.06	270.991	96.5079	253.025	-1.39279	1.76196e-06	2.96299e-05	CABZ01111953.1	19	1097393	1112800	+	2542	protein_coding	-	-	100	92	244	266	1.15788	0.931489	2.54145	2.9389
ENSDARG00000075296	70.6527	96.2447	203.269	237.372	83.4487	220.32	-1.39685	9.97717e-06	0.000140452	fam83c	6	52468139	52484566	-	1874	protein_coding	family with sequence similarity 83, member C [Source:ZFIN;Acc:ZDB-GENE-120201-3]	-	66	103	211	233	1.03661	1.4146	2.98113	3.49192
ENSDARG00000061416	25.6919	24.2948	68.3986	63.1632	24.9933	65.7809	-1.39706	0.0086511	0.0440092	c2cd4a	25	32886143	32888115	-	1679	protein_coding	C2 calcium dependent domain containing 4A [Source:ZFIN;Acc:ZDB-GENE-030131-5712]	C2	24	26	71	62	0.420728	0.398555	1.11963	1.0371
ENSDARG00000104207	78.1462	63.5402	173.405	199.677	70.8432	186.541	-1.39898	2.49472e-05	0.000313919	pcyt1bb	21	40618615	40630650	-	1671	protein_coding	phosphate cytidylyltransferase 1, choline, beta b [Source:ZFIN;Acc:ZDB-GENE-051120-48]	CTP_transf_2	73	68	180	196	1.28584	1.04736	2.8521	3.29426
ENSDARG00000095939	42.8198	69.1466	159.918	136.514	55.9832	148.216	-1.39969	0.000310771	0.00278409	si:ch73-226l13.2	11	29975830	29981972	+	1504	protein_coding	si:ch73-226l13.2 [Source:ZFIN;Acc:ZDB-GENE-110411-18]	-	40	74	166	134	0.782804	1.26634	2.92232	2.50228
ENSDARG00000043770	46.0313	53.2616	112.713	149.758	49.6465	131.236	-1.40001	0.000398405	0.00343158	si:dkey-192d15.2	7	3597413	3611842	+	6934	protein_coding	si:dkey-192d15.2 [Source:ZFIN;Acc:ZDB-GENE-040724-74]	Pkinase	43	57	117	147	0.182526	0.211571	0.446756	0.595404
ENSDARG00000039436	123.107	130.818	327.543	344.342	126.963	335.942	-1.40297	1.63649e-08	4.10739e-07	il13ra2	5	37101393	37117778	-	2155	protein_coding	interleukin 13 receptor, alpha 2 [Source:ZFIN;Acc:ZDB-GENE-030521-10]	-	115	140	340	338	1.57069	1.67204	4.17734	4.40502
ENSDARG00000101218	47.1018	56.0648	150.284	123.27	51.5833	136.777	-1.40515	0.000247229	0.00229757	si:ch73-345f18.3	19	2590182	2593912	+	864	protein_coding	si:ch73-345f18.3 [Source:ZFIN;Acc:ZDB-GENE-141212-392]	-	44	60	156	121	1.49892	1.78732	4.78056	3.93324
ENSDARG00000033466	439.974	624.189	1603.03	1223.53	532.081	1413.28	-1.40783	3.41522e-13	1.60809e-11	tagln2	5	37087583	37095460	+	1359	protein_coding	transgelin 2 [Source:ZFIN;Acc:ZDB-GENE-020802-2]	CH	411	668	1664	1201	8.9015	12.6509	32.4192	24.82
ENSDARG00000054026	33.1854	31.7701	85.7391	86.5948	32.4777	86.167	-1.40824	0.00256949	0.016625	mustn1a	6	40841156	40842768	-	598	protein_coding	musculoskeletal, embryonic nuclear protein 1a [Source:ZFIN;Acc:ZDB-GENE-111129-3]	-	31	34	89	85	1.52581	1.46333	3.94055	3.99205
ENSDARG00000036943	215.17	239.21	605.954	601.07	227.19	603.512	-1.40834	5.3547e-13	2.47344e-11	golph3l	19	329808	340641	-	4378	protein_coding	golgi phosphoprotein 3-like [Source:ZFIN;Acc:ZDB-GENE-051113-168]	-	201	256	629	590	1.35133	1.50498	3.80402	3.7849
ENSDARG00000074166	837.128	861.53	2508.59	2017.15	849.329	2262.87	-1.4138	4.27925e-23	5.61043e-21	birc6	17	22587356	22741729	+	15893	protein_coding	baculoviral IAP repeat containing 6 [Source:ZFIN;Acc:ZDB-GENE-091202-7]	UQ_con	782	922	2604	1980	1.44824	1.4931	4.33813	3.49895
ENSDARG00000104593	609.112	634.467	1385.31	1929.54	621.79	1657.42	-1.41393	1.76546e-16	1.2042e-14	cyp2k18	3	12710350	12715432	+	2335	protein_coding	cytochrome P450, family 2, subfamily K, polypeptide 18 [Source:ZFIN;Acc:ZDB-GENE-040426-1584]	p450	569	679	1438	1894	7.17243	7.48425	16.3057	22.7809
ENSDARG00000054771	20.3394	31.7701	69.362	70.2946	26.0548	69.8283	-1.41669	0.00780209	0.0405764	ghra	8	31465222	31606514	-	2359	protein_coding	growth hormone receptor a [Source:ZFIN;Acc:ZDB-GENE-070509-1]	-	19	34	72	69	0.237064	0.370951	0.808114	0.821485
ENSDARG00000058835	108.12	133.621	345.847	300.535	120.871	323.191	-1.41683	7.65321e-08	1.70812e-06	si:ch73-212j7.3	20	3145497	3160687	-	3381	protein_coding	si:ch73-212j7.3 [Source:ZFIN;Acc:ZDB-GENE-081104-259]	-	101	143	359	295	0.879259	1.08857	2.81136	2.4505
ENSDARG00000055185	189.478	178.473	567.42	414.636	183.975	491.028	-1.41737	1.60739e-09	4.68626e-08	tm4sf5	7	21841037	21848205	+	1654	protein_coding	transmembrane 4 L six family member 5 [Source:ZFIN;Acc:ZDB-GENE-040718-65]	-	177	191	589	407	3.14977	2.9721	9.42861	6.91094
ENSDARG00000093750	19.2689	41.1142	79.959	82.5197	30.1916	81.2393	-1.41979	0.00680234	0.0362642	cd180	5	54938634	54941004	+	2279	protein_coding	CD180 molecule [Source:ZFIN;Acc:ZDB-GENE-070705-323]	-	18	44	83	81	0.232471	0.496905	0.964277	0.998203
ENSDARG00000087013	6560	7176.3	16077.5	20729.8	6868.15	18403.7	-1.42188	3.5242e-30	7.14467e-28	cubn	24	32035759	32150276	-	10878	protein_coding	cubilin (intrinsic factor-cobalamin receptor) [Source:ZFIN;Acc:ZDB-GENE-060228-6]	CUB	6128	7680	16689	20348	16.581	18.1709	40.6209	52.5353
ENSDARG00000091859	50.3133	32.7045	112.713	109.008	41.5089	110.86	-1.42251	0.000988111	0.00746796	si:ch73-233m11.2	8	7055619	7078575	-	3075	protein_coding	si:ch73-233m11.2 [Source:ZFIN;Acc:ZDB-GENE-081104-266]	NACHT	47	35	117	107	0.449877	0.292946	1.00742	0.977275
ENSDARG00000025797	27.8329	35.5077	83.8124	86.5948	31.6703	85.2036	-1.42455	0.00274751	0.0175742	abhd2a	7	13824150	13858955	+	1645	protein_coding	abhydrolase domain containing 2a [Source:ZFIN;Acc:ZDB-GENE-040426-784]	Abhydrolase_1	26	38	87	85	0.465209	0.594543	1.4003	1.45121
ENSDARG00000056480	2713.71	2747.18	6591.32	8085.91	2730.44	7338.62	-1.42626	4.2514e-33	1.03427e-30	cpvl	16	20496691	20515806	+	2989	protein_coding	carboxypeptidase, vitellogenic-like [Source:ZFIN;Acc:ZDB-GENE-031219-2]	Peptidase_S10	2535	2940	6842	7937	24.9628	25.3155	60.6073	74.5777
ENSDARG00000017155	42.8198	57.9337	137.761	134.477	50.3768	136.119	-1.43035	0.000210963	0.00200566	wnt10a	9	11379782	11409691	+	1775	protein_coding	wingless-type MMTV integration site family, member 10a [Source:ZFIN;Acc:ZDB-GENE-990415-278]	wnt	40	62	143	132	0.663288	0.898998	2.13307	2.08859
ENSDARG00000042094	298.668	453.191	1003.82	1033.02	375.93	1018.42	-1.4351	6.66432e-13	3.05262e-11	eef2a.1	22	20135443	20143425	+	3825	protein_coding	eukaryotic translation elongation factor 2a, tandem duplicate 1 [Source:ZFIN;Acc:ZDB-GENE-050522-500]	GTP_EFTU	279	485	1042	1014	2.14691	3.26344	7.21281	7.44535
ENSDARG00000031278	52.4543	89.7038	179.185	206.809	71.079	192.997	-1.43532	5.62696e-05	0.000637363	si:ch73-193i2.2	13	3327417	3351708	-	2410	protein_coding	si:ch73-193i2.2 [Source:ZFIN;Acc:ZDB-GENE-141215-32]	Ion_trans	49	96	186	203	0.598439	1.02523	2.04345	2.36569
ENSDARG00000094258	71.7232	41.1142	158.955	145.683	56.4187	152.319	-1.43903	0.000230637	0.00216265	commd9	17	24618640	24622996	+	1014	protein_coding	COMM domain containing 9 [Source:ZFIN;Acc:ZDB-GENE-070424-139]	-	67	44	165	143	1.94481	1.11681	4.30838	3.96074
ENSDARG00000056410	99.5561	82.2284	247.584	245.522	90.8923	246.553	-1.44202	7.04181e-07	1.3e-05	fdx1	9	29520696	29535453	+	1427	protein_coding	ferredoxin 1 [Source:ZFIN;Acc:ZDB-GENE-071015-2]	-	93	88	257	241	1.91823	1.58717	4.76845	4.7432
ENSDARG00000114245	527.755	863.399	1467.2	2317.68	695.577	1892.44	-1.44361	0.0022977	0.0150804	zgc:158619	9	168442	180334	-	2599	protein_coding	zgc:158619 [Source:ZFIN;Acc:ZDB-GENE-070209-116]	-	493	924	1523	2275	5.58318	9.15021	15.5153	24.5841
ENSDARG00000043175	59.9478	37.3766	178.222	85.576	48.6622	131.899	-1.44391	0.00190056	0.0129058	zgc:112368	22	7462997	7470338	+	1246	protein_coding	zgc:112368 [Source:ZFIN;Acc:ZDB-GENE-050522-187]	Trypsin	56	40	185	84	1.32285	0.826242	3.93117	1.89339
ENSDARG00000023768	19.2689	37.3766	84.7758	70.2946	28.3227	77.5352	-1.44577	0.0064031	0.0346333	mfsd4aa	11	38429319	38458406	+	2242	protein_coding	major facilitator superfamily domain containing 4Aa [Source:ZFIN;Acc:ZDB-GENE-040426-1643]	MFS_1	18	40	88	69	0.236308	0.459187	1.03924	0.864354
ENSDARG00000061375	1383.08	1387.61	3933.4	3635.96	1385.34	3784.68	-1.44998	1.35763e-38	4.873e-36	sgpl1	13	25725547	25750910	-	5884	protein_coding	sphingosine-1-phosphate lyase 1 [Source:ZFIN;Acc:ZDB-GENE-070410-24]	-	1292	1485	4083	3569	6.46295	6.4956	18.3728	17.0354
ENSDARG00000100315	69.5822	98.1135	226.39	233.297	83.8479	229.843	-1.4508	3.12505e-06	4.99803e-05	slc15a1a	9	1137430	1162804	+	2870	protein_coding	solute carrier family 15 (oligopeptide transporter), member 1a [Source:ZFIN;Acc:ZDB-GENE-091204-9]	-	65	105	235	229	0.666611	0.941613	2.16797	2.24095
ENSDARG00000053119	44.9608	43.9175	113.677	129.383	44.4391	121.53	-1.45141	0.000291303	0.0026368	smpdl3a	20	40337423	40367493	-	1639	protein_coding	sphingomyelin phosphodiesterase, acid-like 3A [Source:ZFIN;Acc:ZDB-GENE-050327-61]	Metallophos	42	47	118	127	0.754243	0.738047	1.90621	2.17622
ENSDARG00000070353	270.836	443.847	979.738	984.124	357.341	981.931	-1.45543	1.09448e-11	4.34912e-10	hoxc13a	23	36052944	36055886	+	1162	protein_coding	homeobox C13a [Source:ZFIN;Acc:ZDB-GENE-000822-4]	Homeobox	253	475	1017	966	6.40848	10.5209	23.173	23.348
ENSDARG00000093120	49.2428	52.3272	164.735	114.101	50.785	139.418	-1.45698	0.00021024	0.00199965	si:dkey-117m1.4	1	40057412	40086978	-	2953	protein_coding	si:dkey-117m1.4 [Source:ZFIN;Acc:ZDB-GENE-090313-177]	-	46	56	171	112	0.458496	0.488079	1.53321	1.0652
ENSDARG00000042874	68.5117	63.5402	153.174	209.865	66.026	181.52	-1.45927	2.57249e-05	0.000322224	phlda2	25	23524796	23526086	-	1291	protein_coding	pleckstrin homology-like domain, family A, member 2 [Source:ZFIN;Acc:ZDB-GENE-050522-73]	-	64	68	159	206	1.45913	1.35565	3.26091	4.48146
ENSDARG00000006522	228.016	246.685	678.206	630.614	237.35	654.41	-1.46245	1.66932e-14	8.9803e-13	otop2	3	56905103	56918442	+	2060	protein_coding	otopetrin 2 [Source:ZFIN;Acc:ZDB-GENE-050104-2]	-	213	264	704	619	3.04336	3.29839	9.04843	8.43921
ENSDARG00000077955	80.2872	99.9823	247.584	250.615	90.1348	249.1	-1.46387	5.27481e-07	9.99931e-06	rnf6	24	21501842	21511737	-	4578	protein_coding	ring finger protein (C3H2C3 type) 6 [Source:ZFIN;Acc:ZDB-GENE-100209-1]	-	75	107	257	246	0.482199	0.601552	1.48636	1.50917
ENSDARG00000070122	98.4856	92.507	305.385	222.09	95.4963	263.738	-1.4669	8.40486e-07	1.52844e-05	stk11ip	6	20954400	20999623	+	6664	protein_coding	serine/threonine kinase 11 interacting protein [Source:ZFIN;Acc:ZDB-GENE-040426-1022]	-	92	99	317	218	0.406344	0.382354	1.25948	0.918755
ENSDARG00000116378	1724.57	1767.91	4580.78	5081.58	1746.24	4831.18	-1.46793	1.01924e-40	3.98505e-38	CU104731.1	4	76492691	76507576	+	5156	protein_coding	-	-	1611	1892	4755	4988	9.19652	9.44438	24.4177	27.1701
ENSDARG00000098837	2815.4	2832.21	7662.57	7969.78	2823.81	7816.17	-1.46878	3.24815e-52	1.92212e-49	tgm5l	6	2145564	2162446	-	2402	protein_coding	transglutaminase 5, like [Source:ZFIN;Acc:ZDB-GENE-110411-176]	Transglut_core	2630	3031	7954	7823	32.2273	32.4772	87.676	91.47
ENSDARG00000055138	57.8068	76.622	193.636	179.302	67.2144	186.469	-1.46882	1.28312e-05	0.000175259	zgc:110410	16	25599379	25608453	-	2399	protein_coding	zgc:110410 [Source:ZFIN;Acc:ZDB-GENE-050522-465]	-	54	82	201	176	0.662528	0.879729	2.21837	2.06044
ENSDARG00000004687	385.379	398.06	1060.66	1120.64	391.72	1090.65	-1.47688	2.83962e-21	3.2382e-19	acaa1	24	20325312	20332460	+	1781	protein_coding	acetyl-CoA acyltransferase 1 [Source:ZFIN;Acc:ZDB-GENE-040704-48]	Thiolase_N	360	426	1101	1100	5.94949	6.15617	16.3678	17.3463
ENSDARG00000062467	61.0183	73.8187	182.075	194.584	67.4185	188.329	-1.47948	7.43888e-06	0.000108728	stra6l	1	12172322	12193239	+	5458	protein_coding	STRA6-like [Source:ZFIN;Acc:ZDB-GENE-070410-116]	-	57	79	189	191	0.307385	0.372528	0.916846	0.982829
ENSDARG00000099233	27.8329	25.2292	86.7025	61.1257	26.531	73.9141	-1.48023	0.00452488	0.026363	si:zfos-2372e4.1	25	4750972	4757823	+	1169	protein_coding	si:zfos-2372e4.1 [Source:ZFIN;Acc:ZDB-GENE-131127-560]	-	26	27	90	60	0.654636	0.594449	2.03843	1.4415
ENSDARG00000016918	1572.56	1902.47	5006.59	4693.44	1737.51	4850.01	-1.48028	1.10924e-33	2.89128e-31	ace2	11	29981678	29996357	-	2871	protein_coding	angiotensin I converting enzyme 2 [Source:ZFIN;Acc:ZDB-GENE-041114-6]	Peptidase_M2	1469	2036	5197	4607	15.0602	18.252	47.9278	45.0675
ENSDARG00000039213	49.2428	53.2616	122.347	164.021	51.2522	143.184	-1.48057	0.000111534	0.00115463	prpf38a	6	33926829	33931696	-	1308	protein_coding	pre-mRNA processing factor 38A [Source:ZFIN;Acc:ZDB-GENE-040801-225]	PRP38	46	57	127	161	1.03512	1.12159	2.57077	3.45698
ENSDARG00000076179	496.71	581.206	1593.4	1424.23	538.958	1508.81	-1.48409	1.26467e-22	1.60988e-20	ngef	15	40074923	40133784	+	7638	protein_coding	neuronal guanine nucleotide exchange factor [Source:ZFIN;Acc:ZDB-GENE-130530-794]	RhoGEF	464	622	1654	1398	1.78805	2.09593	5.73355	5.14051
ENSDARG00000095805	23.5509	27.098	46.2413	95.7636	25.3245	71.0025	-1.48436	0.00921568	0.0461438	si:dkey-16n15.6	8	23390844	23396194	+	3104	protein_coding	si:dkey-16n15.6 [Source:ZFIN;Acc:ZDB-GENE-110411-70]	-	22	29	48	94	0.208613	0.240459	0.409437	0.85052
ENSDARG00000040466	3326.03	3452.66	9485.25	9490.79	3389.35	9488.02	-1.48498	5.69727e-56	3.89818e-53	vil1	9	44907768	44953664	-	6769	protein_coding	villin 1 [Source:ZFIN;Acc:ZDB-GENE-040426-799]	-	3107	3695	9846	9316	13.5101	14.0493	38.5126	38.653
ENSDARG00000097452	68.5117	82.2284	199.416	224.128	75.3701	211.772	-1.48792	2.29232e-06	3.77087e-05	CU929070.1	11	7149504	7151246	+	791	processed_transcript	-	-	64	88	207	220	2.38147	2.86333	6.92886	7.81132
ENSDARG00000086620	20.3394	31.7701	87.6659	59.0882	26.0548	73.377	-1.48924	0.00588888	0.0324389	gckr	17	5863150	5878032	-	1211	protein_coding	glucokinase (hexokinase 4) regulator [Source:ZFIN;Acc:ZDB-GENE-110411-248]	-	19	34	91	58	0.461796	0.722603	1.9896	1.34512
ENSDARG00000094023	19.2689	28.0324	55.8749	77.4259	23.6507	66.6504	-1.48928	0.00731205	0.0383739	AL935183.1	4	23122744	23123510	-	484	processed_transcript	-	-	18	30	58	76	1.09463	1.5953	3.17286	4.41008
ENSDARG00000113877	99.5561	146.703	344.883	351.473	123.13	348.178	-1.49557	2.93632e-08	7.05611e-07	hoxc13b	11	2156430	2162821	+	4736	protein_coding	homeobox C13b [Source:ZFIN;Acc:ZDB-GENE-000822-5]	Homeobox	93	157	358	345	0.577979	0.853205	2.00142	2.04591
ENSDARG00000011581	223.734	272.849	679.17	724.34	248.291	701.755	-1.4968	9.89695e-15	5.47206e-13	si:dkey-23k10.5	15	36349009	36357889	-	5843	protein_coding	si:dkey-23k10.5 [Source:ZFIN;Acc:ZDB-GENE-030131-4787]	-	209	292	705	711	1.05281	1.28621	3.19463	3.41753
ENSDARG00000113274	57.8068	46.7207	155.101	139.57	52.2637	147.336	-1.49821	5.63072e-05	0.000637459	gsta.1	13	835390	840787	+	672	protein_coding	glutathione S-transferase, alpha tandem duplicate 1 [Source:ZFIN;Acc:ZDB-GENE-040426-2720]	GST_N	54	50	161	137	2.36519	1.91499	6.34344	5.72571
ENSDARG00000027070	48.1723	32.7045	114.64	113.083	40.4384	113.861	-1.49839	0.000448857	0.00379889	acbd4	12	15568761	15620090	-	1754	protein_coding	acyl-CoA binding domain containing 4 [Source:ZFIN;Acc:ZDB-GENE-040426-2074]	-	45	35	119	111	0.755133	0.513575	1.79633	1.77734
ENSDARG00000056921	29.9739	39.2454	116.567	79.4634	34.6096	98.0151	-1.49933	0.00135741	0.00977649	ankk1	15	22014029	22024954	+	2448	protein_coding	ankyrin repeat and kinase domain containing 1 [Source:ZFIN;Acc:ZDB-GENE-071015-4]	Pkinase_Tyr	28	42	121	78	0.336657	0.441574	1.30871	0.894873
ENSDARG00000079497	81.3577	64.4746	168.588	246.54	72.9161	207.564	-1.51112	1.0069e-05	0.000141412	tcima	5	27866649	27867657	-	1009	protein_coding	transcriptional and immune response regulator a [Source:ZFIN;Acc:ZDB-GENE-050320-36]	-	76	69	175	242	2.21699	1.76004	4.59214	6.73601
ENSDARG00000097635	294.386	376.569	983.592	933.186	335.478	958.389	-1.51229	3.16087e-17	2.38576e-15	wu:fb18f06	15	46356879	46358766	+	1775	protein_coding	wu:fb18f06 [Source:ZFIN;Acc:ZDB-GENE-030131-261]	-	275	403	1021	916	4.56011	5.84349	15.2298	14.4936
ENSDARG00000009470	63.1593	69.1466	188.819	189.49	66.153	189.154	-1.51449	3.55118e-06	5.64245e-05	hnf1a	8	39802506	39817167	+	2961	protein_coding	HNF1 homeobox a [Source:ZFIN;Acc:ZDB-GENE-021206-12]	HNF-1B_C	59	74	196	186	0.586482	0.643219	1.75261	1.76422
ENSDARG00000013871	777.18	981.135	2804.34	2228.03	879.157	2516.19	-1.51615	6.54938e-22	7.96659e-20	slc5a1	10	17135631	17159761	-	2835	protein_coding	solute carrier family 5 (sodium/glucose cotransporter), member 1 [Source:ZFIN;Acc:ZDB-GENE-040426-1524]	-	726	1050	2911	2187	7.53745	9.53238	27.1867	21.6658
ENSDARG00000037861	271.906	243.882	659.902	816.028	257.894	737.965	-1.51749	1.01433e-14	5.59412e-13	slc2a3b	16	12474861	12496632	-	4303	protein_coding	solute carrier family 2 (facilitated glucose transporter), member 3b [Source:ZFIN;Acc:ZDB-GENE-121031-5]	Sugar_tr	254	261	685	801	1.73741	1.56111	4.2149	5.22805
ENSDARG00000110019	33.1854	44.8519	127.164	96.7824	39.0186	111.973	-1.51774	0.000493718	0.00414174	CABZ01079267.1	6	60004871	60024255	+	132	protein_coding	-	-	31	48	132	95	6.9124	9.35907	26.4769	20.2129
ENSDARG00000025218	226.945	226.128	615.588	682.571	226.537	649.079	-1.5185	3.10632e-15	1.81368e-13	myo5ab	25	7612606	7650335	-	5554	protein_coding	myosin VAb [Source:ZFIN;Acc:ZDB-GENE-050411-72]	Myosin_head	212	242	639	670	1.12349	1.12144	3.04623	3.38803
ENSDARG00000018303	63.1593	78.4908	225.427	181.34	70.825	203.383	-1.51968	3.91171e-06	6.15722e-05	etv4	12	27536095	27568694	+	1974	protein_coding	ets variant 4 [Source:ZFIN;Acc:ZDB-GENE-990415-71]	ETS_PEA3_N	59	84	234	178	0.879722	1.09521	3.1386	2.53251
ENSDARG00000017261	24.6214	41.1142	72.2521	117.158	32.8678	94.7049	-1.52012	0.00235717	0.0154199	gdpd1	15	16886196	16894875	+	2669	protein_coding	glycerophosphodiester phosphodiesterase domain containing 1 [Source:ZFIN;Acc:ZDB-GENE-040822-22]	-	23	44	75	115	0.253641	0.424296	0.744013	1.21012
ENSDARG00000104924	25.6919	23.3604	66.4719	74.3696	24.5261	70.4208	-1.52272	0.00368063	0.0222249	BX072577.1	21	33187992	33212425	+	2565	protein_coding	-	-	24	25	69	73	0.2754	0.250852	0.712245	0.799307
ENSDARG00000096989	55.6658	95.3102	219.646	215.978	75.488	217.812	-1.52313	7.5129e-06	0.000109737	fam110c	23	35486037	35491587	-	5551	protein_coding	family with sequence similarity 110, member C [Source:ZFIN;Acc:ZDB-GENE-131121-63]	-	52	102	228	212	0.275723	0.472927	1.08751	1.07261
ENSDARG00000017165	123.107	113.999	303.459	377.961	118.553	340.71	-1.52348	5.23809e-09	1.40894e-07	slc3a1	13	10649069	10672538	-	3754	protein_coding	solute carrier family 3 (amino acid transporter heavy chain), member 1 [Source:ZFIN;Acc:ZDB-GENE-090313-225]	-	115	122	315	371	0.901663	0.836432	2.22169	2.77561
ENSDARG00000003403	294.386	339.192	888.219	939.299	316.789	913.759	-1.52676	7.18837e-19	6.39795e-17	tenm1	5	21295747	21524251	-	9037	protein_coding	teneurin transmembrane protein 1 [Source:ZFIN;Acc:ZDB-GENE-060531-26]	-	275	363	922	922	0.895672	1.03383	2.70131	2.8654
ENSDARG00000010553	79.2167	45.7863	251.437	107.989	62.5015	179.713	-1.52889	0.000614661	0.00499554	mmgt1	14	31615577	31619408	-	1327	protein_coding	membrane magnesium transporter 1 [Source:ZFIN;Acc:ZDB-GENE-040801-65]	-	74	49	261	106	1.64135	0.950365	5.2076	2.24343
ENSDARG00000026634	150.94	160.719	317.909	582.732	155.83	450.321	-1.52984	1.3659e-07	2.91202e-06	ehmt1b	21	14644247	14692119	-	6056	protein_coding	euchromatic histone-lysine N-methyltransferase 1b [Source:ZFIN;Acc:ZDB-GENE-080515-3]	SET	141	172	330	572	0.685289	0.730984	1.44277	2.6527
ENSDARG00000044685	44.9608	36.4422	89.5926	145.683	40.7015	117.638	-1.53273	0.00053242	0.00441566	nr0b2a	16	54875530	54880550	+	3063	protein_coding	nuclear receptor subfamily 0, group B, member 2a [Source:ZFIN;Acc:ZDB-GENE-080403-1]	Hormone_recep	42	39	93	143	0.403593	0.327705	0.803903	1.3112
ENSDARG00000077728	59.9478	53.2616	171.478	155.871	56.6047	163.674	-1.53362	1.34413e-05	0.000182453	supv3l1	13	23037585	23051766	-	2792	protein_coding	SUV3-like helicase [Source:ZFIN;Acc:ZDB-GENE-030131-2838]	Helicase_C	56	57	178	153	0.590355	0.525442	1.688	1.53906
ENSDARG00000036864	451.749	556.911	1464.31	1461.92	504.33	1463.12	-1.53493	2.5657e-23	3.48919e-21	slc34a2b	23	1078072	1104995	+	2543	protein_coding	solute carrier family 34 (type II sodium/phosphate cotransporter), member 2b [Source:ZFIN;Acc:ZDB-GENE-030709-1]	Na_Pi_cotrans	422	596	1520	1435	4.88435	6.03205	15.8258	15.8483
ENSDARG00000029747	1243.92	1031.59	3290.84	3337.46	1137.75	3314.15	-1.54344	5.80382e-34	1.58843e-31	mep1a.1	20	35473288	35481584	+	2340	protein_coding	meprin A, alpha (PABA peptide hydrolase), tandem duplicate 1 [Source:ZFIN;Acc:ZDB-GENE-041001-209]	Astacin	1162	1104	3416	3276	14.6161	12.1428	38.6518	39.3194
ENSDARG00000102226	63.1593	55.1304	176.295	168.096	59.1449	172.195	-1.54364	7.17919e-06	0.000105213	gpr19	4	128697	133492	-	1857	protein_coding	G protein-coupled receptor 19 [Source:ZFIN;Acc:ZDB-GENE-040426-1295]	7tm_1	59	59	183	165	0.935149	0.817721	2.6092	2.49546
ENSDARG00000114063	236.58	192.489	770.689	478.818	214.534	624.754	-1.54408	7.34763e-10	2.27226e-08	parm1	10	15064433	15076420	+	5716	protein_coding	prostate androgen-regulated mucin-like protein 1 [Source:ZFIN;Acc:ZDB-GENE-140106-262]	-	221	206	800	470	1.138	0.927556	3.70566	2.30932
ENSDARG00000070396	22.4804	29.9013	60.6918	92.7073	26.1908	76.6995	-1.54565	0.00342299	0.0209816	serpinb1l2	20	26916639	26919945	+	1959	protein_coding	serpin peptidase inhibitor, clade B (ovalbumin), member 1, like 2 [Source:ZFIN;Acc:ZDB-GENE-041001-117]	Serpin	21	32	63	91	0.315519	0.420418	0.851479	1.30462
ENSDARG00000037852	179.843	193.424	597.284	495.118	186.634	546.201	-1.54876	5.30682e-13	2.45651e-11	zgc:101663	23	383782	397300	+	5189	protein_coding	zgc:101663 [Source:ZFIN;Acc:ZDB-GENE-041114-149]	-	168	207	620	486	0.952942	1.02672	3.16356	2.63046
ENSDARG00000098453	51.3838	94.3758	183.039	245.522	72.8798	214.28	-1.54965	2.04156e-05	0.000265282	pank4	11	15878343	15915788	+	3216	protein_coding	pantothenate kinase 4 [Source:ZFIN;Acc:ZDB-GENE-040426-1592]	Fumble	48	101	190	241	0.439305	0.808296	1.56425	2.10465
ENSDARG00000115425	20.3394	20.5571	49.1314	71.3133	20.4483	60.2224	-1.55734	0.00721221	0.0380326	CABZ01038524.1	3	58608169	58617819	-	3246	protein_coding	-	NACHT	19	22	51	70	0.172284	0.174437	0.415996	0.605659
ENSDARG00000109368	31.0444	30.8357	108.86	73.3509	30.94	91.1053	-1.559	0.00120687	0.00886131	si:dkey-182g1.2	22	8628064	8634560	+	804	protein_coding	si:dkey-182g1.2 [Source:ZFIN;Acc:ZDB-GENE-060503-619]	V-set	29	33	113	72	1.06165	1.05639	3.72126	2.5151
ENSDARG00000052413	67.4413	126.146	337.176	235.334	96.7936	286.255	-1.55962	4.56967e-06	7.0609e-05	crfb12	5	57673141	57686487	-	2649	protein_coding	cytokine receptor family member B12 [Source:ZFIN;Acc:ZDB-GENE-060421-4184]	-	63	135	350	231	0.700002	1.31165	3.49828	2.44911
ENSDARG00000029308	24.6214	14.0162	61.6551	51.9569	19.3188	56.806	-1.56368	0.00977264	0.0481988	prr15lb	12	28808645	28818734	-	1452	protein_coding	proline rich 15-like b [Source:ZFIN;Acc:ZDB-GENE-050417-201]	-	23	15	64	51	0.466232	0.265883	1.16703	0.986466
ENSDARG00000008494	129.53	276.587	599.211	605.145	203.058	602.178	-1.564	4.09794e-08	9.57571e-07	myl6	6	39874177	39893526	-	2836	protein_coding	myosin, light chain 6, alkali, smooth muscle and non-muscle [Source:ZFIN;Acc:ZDB-GENE-041010-28]	-	121	296	622	594	1.2558	2.68628	5.807	5.88245
ENSDARG00000023587	48.1723	34.5733	107.896	136.514	41.3728	122.205	-1.56626	0.00019575	0.00188393	kcnk5a	17	48683769	48705993	-	1949	protein_coding	potassium channel, subfamily K, member 5a [Source:ZFIN;Acc:ZDB-GENE-051113-112]	Ion_trans_2	45	37	112	134	0.679581	0.488602	1.52151	1.93095
ENSDARG00000079839	33.1854	48.5895	113.677	129.383	40.8875	121.53	-1.56645	0.000190598	0.00184001	arrdc1b	21	14699693	14762944	-	1332	protein_coding	arrestin domain containing 1b [Source:ZFIN;Acc:ZDB-GENE-080515-2]	-	31	52	118	127	0.685012	1.00476	2.34556	2.6778
ENSDARG00000104609	299.739	281.259	859.318	860.854	290.499	860.086	-1.56665	5.63634e-20	5.58406e-18	crebbpa	22	26703026	26791767	+	9682	protein_coding	CREB binding protein a [Source:ZFIN;Acc:ZDB-GENE-050208-439]	KIX	280	301	892	845	0.851204	0.800141	2.43931	2.45115
ENSDARG00000101629	1632.51	1545.52	4756.11	4664.91	1589.01	4710.51	-1.56807	1.06888e-49	6.00082e-47	CABZ01079192.1	18	1837668	1925826	+	3987	protein_coding	-	Glyco_hydro_31	1525	1654	4937	4579	11.2581	10.6771	32.7857	32.2554
ENSDARG00000005463	191.619	237.341	559.713	716.19	214.48	637.951	-1.57023	5.04757e-13	2.34145e-11	slc30a1a	20	13894123	13913790	+	2996	protein_coding	solute carrier family 30 (zinc transporter), member 1a [Source:ZFIN;Acc:ZDB-GENE-040426-1840]	-	179	254	581	703	1.75854	2.18201	5.13455	6.5901
ENSDARG00000070721	74.9347	125.211	289.008	307.666	100.073	298.337	-1.57061	2.11881e-07	4.32754e-06	vdrb	6	38954733	39006449	-	2128	protein_coding	vitamin D receptor b [Source:ZFIN;Acc:ZDB-GENE-080403-10]	zf-C4	70	134	300	302	0.968205	1.62068	3.73265	3.98578
ENSDARG00000060748	36.3969	49.5239	125.237	131.42	42.9604	128.329	-1.57462	9.53133e-05	0.00101305	tsfm	6	39897543	39903431	-	1869	protein_coding	Ts translation elongation factor, mitochondrial [Source:ZFIN;Acc:ZDB-GENE-061215-17]	-	34	53	130	129	0.53544	0.729847	1.84163	1.93847
ENSDARG00000095351	792.167	768.088	2241.74	2413.45	780.128	2327.59	-1.57721	3.70586e-36	1.14281e-33	CU914776.1	8	44340504	44344742	-	1440	processed_transcript	-	-	740	822	2327	2369	15.1255	14.6918	42.786	46.2041
ENSDARG00000067976	40.6788	53.2616	125.237	155.871	46.9702	140.554	-1.57739	5.6826e-05	0.000643	ar	5	35561607	35679140	+	3177	protein_coding	androgen receptor [Source:ZFIN;Acc:ZDB-GENE-060131-1]	Hormone_recep	38	57	130	153	0.352052	0.461767	1.08341	1.35255
ENSDARG00000075110	89.9217	83.1629	286.118	230.24	86.5423	258.179	-1.57831	8.23315e-08	1.82824e-06	dab2ipb	5	33679559	33886495	-	4648	protein_coding	DAB2 interacting protein b [Source:ZFIN;Acc:ZDB-GENE-030131-2449]	C2	84	89	297	226	0.531929	0.492821	1.69184	1.36559
ENSDARG00000052288	20.3394	21.4915	64.5452	61.1257	20.9155	62.8355	-1.58636	0.00439718	0.0257561	zmp:0000000634	6	22679610	22686016	+	4407	protein_coding	zmp:0000000634 [Source:ZFIN;Acc:ZDB-GENE-130530-637]	-	19	23	67	60	0.126897	0.134323	0.402531	0.382372
ENSDARG00000008886	86.7102	215.85	425.806	483.912	151.28	454.859	-1.58667	0.00990766	0.0486823	msx1b	1	49352900	49355313	+	1424	protein_coding	muscle segment homeobox 1b [Source:ZFIN;Acc:ZDB-GENE-980526-26]	Homeobox	81	231	442	475	1.67423	4.1751	8.21827	9.36833
ENSDARG00000101482	114.543	256.029	519.252	601.07	185.286	560.161	-1.5915	1.1562e-07	2.49901e-06	hk2	5	13870340	14004206	+	3832	protein_coding	hexokinase 2 [Source:ZFIN;Acc:ZDB-GENE-040426-2017]	-	107	274	539	590	0.821862	1.84031	3.72418	4.32419
ENSDARG00000052336	98.4856	46.7207	225.427	210.884	72.6032	218.155	-1.59425	1.61917e-05	0.000216037	ociad2	20	23238833	23244193	+	1483	protein_coding	OCIA domain containing 2 [Source:ZFIN;Acc:ZDB-GENE-041014-253]	-	92	50	234	207	1.82594	0.867749	4.17775	3.92019
ENSDARG00000095362	58.8773	31.7701	134.871	137.533	45.3237	136.202	-1.59446	0.000143929	0.0014449	si:ch211-77g15.32	2	47986662	47988542	-	1141	processed_transcript	si:ch211-77g15.32 [Source:ZFIN;Acc:ZDB-GENE-070912-320]	-	55	34	140	135	1.41879	0.766935	3.24871	3.32297
ENSDARG00000096711	28.9034	56.0648	180.149	77.4259	42.4841	128.787	-1.59544	0.00156459	0.0110059	si:ch211-194k22.8	12	28839839	28848015	-	1759	protein_coding	si:ch211-194k22.8 [Source:ZFIN;Acc:ZDB-GENE-030131-1820]	-	27	60	187	76	0.451792	0.877911	2.81478	1.21346
ENSDARG00000108060	131.671	126.146	365.114	415.655	128.908	390.384	-1.59882	3.3349e-11	1.24816e-09	LO017771.1	16	27157683	27161410	-	1979	protein_coding	-	-	123	135	379	408	1.82936	1.75571	5.07062	5.79019
ENSDARG00000097063	34.2559	16.8195	70.3254	83.5385	25.5377	76.9319	-1.59913	0.00326604	0.0201827	sparcl2	17	26543690	26552971	+	1267	protein_coding	SPARC-like 2 [Source:ZFIN;Acc:ZDB-GENE-131127-575]	-	32	18	73	82	0.743386	0.365646	1.52551	1.81767
ENSDARG00000015674	111.332	226.128	464.34	567.45	168.73	515.895	-1.60759	3.79785e-08	8.95707e-07	msx3	13	24662238	24664668	+	2028	protein_coding	muscle segment homeobox 3 [Source:ZFIN;Acc:ZDB-GENE-980526-306]	Homeobox	104	242	482	557	1.50941	3.07123	6.29284	7.71375
ENSDARG00000102271	70.6527	140.162	373.784	270.991	105.407	322.387	-1.60784	1.48571e-06	2.55937e-05	si:dkey-203a12.2	14	15191176	15258549	+	1621	protein_coding	si:dkey-203a12.2 [Source:ZFIN;Acc:ZDB-GENE-091118-100]	-	66	150	388	266	1.1984	2.38163	6.33748	4.60868
ENSDARG00000038964	48.1723	49.5239	169.552	128.364	48.8481	148.958	-1.60876	2.3439e-05	0.000298197	traf4b	21	39005905	39024754	-	1781	protein_coding	tnf receptor-associated factor 4b [Source:ZFIN;Acc:ZDB-GENE-040305-2]	zf-C3HC4	45	53	176	126	0.743686	0.765909	2.61648	1.98694
ENSDARG00000020956	283.681	282.193	980.702	747.771	282.937	864.236	-1.61136	7.27176e-17	5.18616e-15	pck2	24	12920019	12938922	-	3414	protein_coding	phosphoenolpyruvate carboxykinase 2 (mitochondrial) [Source:ZFIN;Acc:ZDB-GENE-040426-2266]	-	265	302	1018	734	2.28467	2.27672	7.895	6.03825
ENSDARG00000091885	20.3394	14.9506	59.7284	47.8818	17.645	53.8051	-1.61327	0.00840978	0.0431021	grnas	19	40186385	40205463	+	2093	antisense	granulin antisense [Source:ZFIN;Acc:ZDB-GENE-060104-1]	-	19	16	62	47	0.267193	0.196751	0.784315	0.630677
ENSDARG00000078109	43.8903	31.7701	165.698	65.2008	37.8302	115.449	-1.614	0.00167448	0.0116242	usp12a	24	21600320	21620316	-	2050	protein_coding	ubiquitin specific peptidase 12a [Source:ZFIN;Acc:ZDB-GENE-060228-3]	UCH	41	34	172	64	0.588669	0.426865	2.22148	0.876808
ENSDARG00000093370	38.5379	37.3766	100.19	132.439	37.9572	116.314	-1.61538	0.000147276	0.001471	lrrc66	20	23185530	23192298	+	403	protein_coding	leucine rich repeat containing 66 [Source:ZFIN;Acc:ZDB-GENE-070705-240]	-	36	40	104	130	2.62929	2.55458	6.83276	9.05976
ENSDARG00000042563	35.3264	14.9506	64.5452	88.6323	25.1385	76.5887	-1.61617	0.0043512	0.0255346	mis18bp1	17	28611746	28623360	+	4034	protein_coding	MIS18 binding protein 1 [Source:ZFIN;Acc:ZDB-GENE-030616-151]	Myb_DNA-binding	33	16	67	87	0.240779	0.102082	0.439751	0.605706
ENSDARG00000007906	3881.62	3545.17	9745.36	13077.8	3713.39	11411.6	-1.61977	2.60555e-33	6.40994e-31	lrp2b	12	16132612	16229402	+	14302	protein_coding	low density lipoprotein receptor-related protein 2b [Source:ZFIN;Acc:ZDB-GENE-111115-1]	Ldl_recept_a	3626	3794	10116	12837	7.46229	6.82756	18.7275	25.2084
ENSDARG00000098296	1399.14	1462.36	3955.56	4849.31	1430.75	4402.43	-1.62122	3.61686e-37	1.23736e-34	gnsb	10	45031398	45047242	+	1934	protein_coding	glucosamine (N-acetyl)-6-sulfatase (Sanfilippo disease IIID), b [Source:ZFIN;Acc:ZDB-GENE-030131-5846]	Sulfatase	1307	1565	4106	4760	19.8912	20.8268	56.2122	69.124
ENSDARG00000103342	794.308	677.45	2289.91	2241.28	735.879	2265.59	-1.62354	6.36576e-34	1.67926e-31	wu:fa56d06	KN149797.1	55555	70688	-	2195	protein_coding	wu:fa56d06 [Source:ZFIN;Acc:ZDB-GENE-030131-9298]	-	742	725	2377	2200	9.9497	8.50098	28.6723	28.1492
ENSDARG00000069537	120.966	83.1629	389.198	238.39	102.064	313.794	-1.62437	4.3725e-07	8.42004e-06	si:dkey-238c7.16	18	7479201	7481036	-	783	protein_coding	si:dkey-238c7.16 [Source:ZFIN;Acc:ZDB-GENE-030131-4169]	-	113	89	404	234	4.24774	2.92546	13.6612	8.39329
ENSDARG00000077504	42.8198	48.5895	182.075	99.8387	45.7047	140.957	-1.62445	0.000143781	0.00144408	si:ch211-103n10.5	8	29718692	29719393	-	702	protein_coding	si:ch211-103n10.5 [Source:ZFIN;Acc:ZDB-GENE-030131-5155]	-	40	52	189	98	1.67712	1.90648	7.12841	3.92073
ENSDARG00000095048	44.9608	46.7207	161.845	121.233	45.8408	141.539	-1.6266	3.15726e-05	0.000384687	si:dkey-250k15.7	16	11683548	11709759	+	2101	protein_coding	si:dkey-250k15.7 [Source:ZFIN;Acc:ZDB-GENE-100921-33]	I-set	42	50	168	119	0.588388	0.612504	2.11715	1.59074
ENSDARG00000089691	124.178	120.539	356.444	399.355	122.358	377.899	-1.62703	2.65756e-11	1.0067e-09	ism2a	17	17861681	17902509	+	3920	protein_coding	isthmin 2a [Source:ZFIN;Acc:ZDB-GENE-130530-972]	TSP_1	116	129	370	392	0.870989	0.846972	2.4991	2.80853
ENSDARG00000042899	39.6084	42.9831	159.918	95.7636	41.2957	127.841	-1.63026	0.000161349	0.00158846	si:ch211-163l21.8	8	23783066	23809686	+	4468	protein_coding	si:ch211-163l21.8 [Source:ZFIN;Acc:ZDB-GENE-041008-93]	-	37	46	166	94	0.243741	0.264978	0.9837	0.590871
ENSDARG00000089878	71.7232	41.1142	195.562	152.814	56.4187	174.188	-1.633	2.14142e-05	0.000275641	nedd9	19	3653976	3707794	+	2909	protein_coding	neural precursor cell expressed, developmentally down-regulated 9 [Source:ZFIN;Acc:ZDB-GENE-061013-318]	SH3_1	67	44	203	150	0.67791	0.389291	1.84765	1.44819
ENSDARG00000040553	154.151	84.0973	351.627	386.111	119.124	368.869	-1.63588	3.80046e-08	8.95707e-07	tmem97	15	23790057	23793641	-	1467	protein_coding	transmembrane protein 97 [Source:ZFIN;Acc:ZDB-GENE-110627-1]	-	144	90	365	379	2.88917	1.57898	6.58765	7.25584
ENSDARG00000061424	23.5509	12.1474	62.6185	47.8818	17.8491	55.2501	-1.63916	0.00911176	0.0457195	znf646	12	28946708	28975705	-	7201	protein_coding	zinc finger protein 646 [Source:ZFIN;Acc:ZDB-GENE-160627-3]	-	22	13	65	47	0.089923	0.0464639	0.238995	0.183309
ENSDARG00000043740	28.9034	19.6227	68.3986	82.5197	24.263	75.4592	-1.64179	0.0018423	0.0125936	efcab11	17	16423721	16533069	+	1562	protein_coding	EF-hand calcium binding domain 11 [Source:ZFIN;Acc:ZDB-GENE-050417-348]	-	27	21	71	81	0.508772	0.346022	1.2035	1.45641
ENSDARG00000100712	35.3264	34.5733	119.457	98.8199	34.9498	109.138	-1.64353	0.00015309	0.00151876	si:dkey-19b23.12	7	20503344	20508771	+	866	protein_coding	si:dkey-19b23.12 [Source:ZFIN;Acc:ZDB-GENE-141216-440]	-	33	37	124	97	1.1216	1.09964	3.79116	3.14581
ENSDARG00000103324	42.8198	75.6875	216.756	155.871	59.2537	186.313	-1.64731	1.69873e-05	0.000225007	si:ch211-127b6.2	4	70791887	71029208	+	5416	protein_coding	si:ch211-127b6.2 [Source:ZFIN;Acc:ZDB-GENE-081103-37]	NACHT	40	81	225	153	0.217381	0.384921	1.09995	0.793398
ENSDARG00000052030	83.4987	130.818	391.125	282.197	107.158	336.661	-1.64774	4.85572e-08	1.12148e-06	akr1a1b	6	33918813	33925432	-	1756	protein_coding	aldo-keto reductase family 1, member A1b (aldehyde reductase) [Source:ZFIN;Acc:ZDB-GENE-050417-118]	Aldo_ket_red	78	140	406	277	1.30741	2.05196	6.12166	4.4303
ENSDARG00000010186	85.6397	79.4252	322.726	195.602	82.5324	259.164	-1.65242	5.31698e-07	1.00705e-05	myo3a	24	6161037	6260333	-	8031	protein_coding	myosin IIIA [Source:ZFIN;Acc:ZDB-GENE-041026-4]	Myosin_head	80	85	335	192	0.293198	0.272405	1.10444	0.671444
ENSDARG00000111876	52.4543	59.8025	196.526	157.908	56.1284	177.217	-1.65743	2.40461e-06	3.94078e-05	CABZ01048392.1	KZ115989.1	57	10913	-	1917	protein_coding	-	-	49	64	204	155	0.752341	0.859257	2.81758	2.27085
ENSDARG00000056781	5670.42	5556.03	16155.6	19318.8	5613.22	17737.2	-1.65987	8.31321e-53	5.05605e-50	zanl	7	26326462	26365420	+	13728	protein_coding	zonadhesin, like [Source:ZFIN;Acc:ZDB-GENE-060131-2]	VWD	5297	5946	16770	18963	11.357	11.1476	32.344	38.7952
ENSDARG00000060796	322.219	458.797	1153.14	1340.69	390.508	1246.92	-1.67235	6.84806e-19	6.11993e-17	slc20a2	8	29770098	29851706	-	8352	protein_coding	solute carrier family 20 (phosphate transporter), member 2 [Source:ZFIN;Acc:ZDB-GENE-060929-828]	-	301	491	1197	1316	1.06076	1.51306	3.79465	4.42531
ENSDARG00000097110	234.439	186.883	607.881	735.546	210.661	671.714	-1.67494	1.75484e-15	1.06433e-13	si:dkey-56f14.4	16	24590538	24598042	-	2037	protein_coding	si:dkey-56f14.4 [Source:ZFIN;Acc:ZDB-GENE-131121-272]	-	219	200	631	722	3.16442	2.52699	8.20175	9.95462
ENSDARG00000042590	107.05	72.8843	275.521	298.497	89.967	287.009	-1.67803	1.3162e-08	3.35486e-07	rbm19	6	45843193	45869164	-	4779	protein_coding	RNA binding motif protein 19 [Source:ZFIN;Acc:ZDB-GENE-031125-3]	RRM_1	100	78	286	293	0.615891	0.420071	1.58452	1.7219
ENSDARG00000088444	46.0313	58.8681	159.918	177.265	52.4497	168.591	-1.68097	2.82454e-06	4.57083e-05	CU929133.1	20	3943237	3953631	-	903	protein_coding	-	-	43	63	166	174	1.40159	1.79564	4.8673	5.41178
ENSDARG00000103253	33.1854	44.8519	133.907	117.158	39.0186	125.532	-1.68201	4.90432e-05	0.000568632	zgc:112023	6	9163007	9173106	+	3241	protein_coding	zgc:112023 [Source:ZFIN;Acc:ZDB-GENE-050417-162]	-	31	48	139	115	0.281529	0.381178	1.13554	0.996546
ENSDARG00000074760	21.4099	24.2948	61.6551	85.576	22.8523	73.6156	-1.68517	0.0016172	0.0113018	ttc7a	13	8693410	8756048	+	3099	protein_coding	tetratricopeptide repeat domain 7A [Source:ZFIN;Acc:ZDB-GENE-010319-27]	-	20	26	64	84	0.189954	0.215932	0.546797	0.761265
ENSDARG00000078541	100.627	83.1629	296.715	294.422	91.8947	295.569	-1.68798	9.3692e-10	2.84915e-08	cers3a	7	9904627	9961727	+	5173	protein_coding	ceramide synthase 3a [Source:ZFIN;Acc:ZDB-GENE-130320-1]	LAG1	94	89	308	289	0.534843	0.442805	1.57644	1.56904
ENSDARG00000098791	311.514	376.569	1065.48	1159.35	344.042	1112.41	-1.69109	1.25704e-23	1.74196e-21	FP245455.1	25	4760489	4780635	+	2281	protein_coding	-	Cadherin	291	403	1106	1138	3.75499	4.54721	12.838	14.0118
ENSDARG00000086746	878.877	923.201	2783.15	3048.14	901.039	2915.64	-1.6937	5.97756e-44	2.56625e-41	prodha	21	5888641	5920826	+	2282	protein_coding	proline dehydrogenase (oxidase) 1a [Source:ZFIN;Acc:ZDB-GENE-041008-73]	-	821	988	2889	2992	10.5893	11.1431	33.5197	36.8234
ENSDARG00000068275	389.661	979.266	2253.3	2178.11	684.463	2215.71	-1.69439	0.00629972	0.0342179	ptx3a	18	41364437	41375120	-	2164	protein_coding	pentraxin 3, long a [Source:ZFIN;Acc:ZDB-GENE-030131-8720]	-	364	1048	2339	2138	4.95091	12.4643	28.6181	27.7478
ENSDARG00000033009	1050.16	1187.64	3487.37	3781.64	1118.9	3634.51	-1.69888	6.80596e-45	3.17056e-42	h3f3c	5	36944533	36949476	-	2437	protein_coding	H3 histone, family 3C [Source:ZFIN;Acc:ZDB-GENE-030131-8175]	Histone	981	1271	3620	3712	11.8483	13.4232	39.3297	42.779
ENSDARG00000100498	47.1018	71.9499	179.185	209.865	59.5259	194.525	-1.70285	1.37e-06	2.37875e-05	CABZ01079251.1	3	13482542	13489945	+	5042	protein_coding	-	-	44	77	186	206	0.256857	0.393055	0.976738	1.14747
ENSDARG00000041586	154.151	197.161	608.844	536.888	175.656	572.866	-1.70292	7.53987e-15	4.25478e-13	dhx40	15	17258246	17285188	+	7465	protein_coding	DEAH (Asp-Glu-Ala-His) box polypeptide 40 [Source:ZFIN;Acc:ZDB-GENE-080507-1]	HA2	144	211	632	527	0.567771	0.727475	2.24158	1.98271
ENSDARG00000038297	28.9034	26.1636	63.5818	116.139	27.5335	89.8604	-1.70663	0.000921503	0.00704726	aspdh	3	16747317	16760923	-	992	protein_coding	aspartate dehydrogenase domain containing [Source:ZFIN;Acc:ZDB-GENE-040912-102]	-	27	28	66	114	0.801111	0.72646	1.76157	3.22754
ENSDARG00000057879	95.2741	71.0155	266.851	275.066	83.1448	270.958	-1.7081	6.1516e-09	1.64055e-07	p3h3	16	11992498	12006828	+	2536	protein_coding	prolyl 3-hydroxylase 3 [Source:ZFIN;Acc:ZDB-GENE-060503-231]	-	89	76	277	270	1.03296	0.771311	2.892	2.99015
ENSDARG00000010194	283.681	253.226	1177.23	577.638	268.454	877.433	-1.70892	0.000549714	0.00453846	eif4bb	6	39064824	39080701	-	2456	protein_coding	eukaryotic translation initiation factor 4Bb [Source:ZFIN;Acc:ZDB-GENE-030131-8563]	RRM_1	265	271	1222	567	3.17584	2.83992	13.1738	6.48385
ENSDARG00000035630	38.5379	35.5077	132.944	109.008	37.0228	120.976	-1.70983	4.30878e-05	0.000507754	ypel1	5	13037106	13086616	-	1731	protein_coding	yippee-like 1 [Source:ZFIN;Acc:ZDB-GENE-040808-41]	-	36	38	138	107	0.612134	0.565004	2.11081	1.73606
ENSDARG00000009942	49.2428	98.1135	216.756	268.953	73.6782	242.855	-1.71383	1.6044e-06	2.73372e-05	cdc6	11	11781973	11792766	-	3706	protein_coding	cell division cycle 6 homolog (S. cerevisiae) [Source:ZFIN;Acc:ZDB-GENE-050506-131]	AAA	46	105	225	264	0.365337	0.729204	1.60748	2.00068
ENSDARG00000090600	204.465	206.506	590.54	763.053	205.485	676.797	-1.71919	1.74124e-16	1.19139e-14	si:ch211-213a13.1	22	8979955	8996337	+	2576	protein_coding	si:ch211-213a13.1 [Source:ZFIN;Acc:ZDB-GENE-050208-471]	-	191	221	613	749	2.18237	2.20806	6.30061	8.16609
ENSDARG00000106873	331.854	214.915	873.769	936.242	273.385	905.005	-1.73031	2.59311e-16	1.73098e-14	LO018188.1	14	49604362	49665640	+	3617	protein_coding	-	-	310	230	907	919	2.52263	1.63661	6.63937	7.13584
ENSDARG00000103900	139.164	91.5726	420.989	343.323	115.369	382.156	-1.73264	4.04723e-10	1.31059e-08	sept9b	6	18935815	19035749	-	4486	protein_coding	septin 9b [Source:ZFIN;Acc:ZDB-GENE-050327-17]	GTP_CDC	130	98	437	337	0.852953	0.562253	2.57923	2.10984
ENSDARG00000078620	14.9869	12.1474	40.4612	49.9193	13.5672	45.1903	-1.73853	0.00965726	0.0478168	si:dkey-156m2.3	1	57966831	57980061	+	6595	protein_coding	si:dkey-156m2.3 [Source:ZFIN;Acc:ZDB-GENE-121213-8]	NACHT	14	13	42	49	0.0624819	0.0507334	0.168617	0.20867
ENSDARG00000043279	67.4413	79.4252	302.495	188.471	73.4332	245.483	-1.74005	2.43399e-07	4.92534e-06	aqp12	22	2874838	2886937	-	994	protein_coding	aquaporin 12 [Source:ZFIN;Acc:ZDB-GENE-040718-310]	-	63	85	314	185	1.8655	2.20089	8.36395	5.22713
ENSDARG00000099207	33.1854	20.5571	132.944	45.8443	26.8712	89.3941	-1.74026	0.00330554	0.0203981	si:dkey-11f4.7	9	360252	403767	-	4193	protein_coding	si:dkey-11f4.7 [Source:ZFIN;Acc:ZDB-GENE-070912-361]	-	31	22	138	45	0.217609	0.13504	0.871409	0.301416
ENSDARG00000091560	251.567	302.75	870.878	987.18	277.158	929.029	-1.74292	8.56971e-22	1.03095e-19	slc6a19a.2	19	684502	704000	-	2404	protein_coding	solute carrier family 6 (neutral amino acid transporter), member 19a, tandem duplicate 2 [Source:ZFIN;Acc:ZDB-GENE-141210-16]	SNF	235	324	904	969	2.87723	3.46877	9.95639	11.3206
ENSDARG00000032553	228.016	253.226	1069.33	554.207	240.621	811.769	-1.75418	3.97758e-11	1.46615e-09	egln3	17	9912036	9936915	-	2315	protein_coding	egl-9 family hypoxia-inducible factor 3 [Source:ZFIN;Acc:ZDB-GENE-040426-2541]	-	213	271	1110	544	2.70813	3.01289	12.6952	6.59973
ENSDARG00000099728	13.9164	30.8357	49.1314	102.895	22.3761	76.0132	-1.7546	0.0038143	0.0228492	zgc:56622	18	13182528	13194362	+	1511	protein_coding	zgc:56622 [Source:ZFIN;Acc:ZDB-GENE-030131-4758]	Aldo_ket_red	13	33	51	101	0.253233	0.562102	0.893663	1.87731
ENSDARG00000052037	46.0313	42.9831	169.552	131.42	44.5072	150.486	-1.75901	4.57922e-06	7.07066e-05	trim35-1	1	58039551	58049515	+	3397	protein_coding	tripartite motif containing 35-1 [Source:ZFIN;Acc:ZDB-GENE-050522-17]	zf-B_box	43	46	176	129	0.372575	0.34852	1.37178	1.06653
ENSDARG00000100051	46.0313	60.7369	226.39	136.514	53.3841	181.452	-1.76273	5.2443e-06	7.99053e-05	si:dkey-203a12.6	14	15495088	15495844	+	409	protein_coding	si:dkey-203a12.6 [Source:ZFIN;Acc:ZDB-GENE-141216-194]	-	43	65	235	134	3.09447	4.0903	15.2129	9.20153
ENSDARG00000012860	16.0574	26.1636	79.959	64.182	21.1105	72.0705	-1.76517	0.00141901	0.01015	tmprss4b	5	37890521	37913074	+	3146	protein_coding	transmembrane protease, serine 4b [Source:ZFIN;Acc:ZDB-GENE-030131-5862]	-	15	28	83	63	0.140337	0.229068	0.698534	0.562419
ENSDARG00000030905	246.214	226.128	791.883	812.972	236.171	802.427	-1.76553	1.17134e-22	1.4998e-20	cited2	20	36915143	36917670	-	2345	protein_coding	Cbp/p300-interacting transactivator, with Glu/Asp-rich carboxy-terminal domain, 2 [Source:ZFIN;Acc:ZDB-GENE-041010-141]	-	230	242	822	798	2.88686	2.65606	9.28105	9.55737
ENSDARG00000101671	41.7493	42.9831	150.284	139.57	42.3662	144.927	-1.77408	3.40067e-06	5.4151e-05	zgc:158417	6	1764469	1768740	-	1581	protein_coding	zgc:158417 [Source:ZFIN;Acc:ZDB-GENE-061201-36]	-	39	46	156	137	0.726062	0.748844	2.61253	2.4337
ENSDARG00000004433	16.0574	17.7539	78.9956	36.6754	16.9057	57.8355	-1.77455	0.00583639	0.0322289	btk	14	38891722	38929885	-	2634	protein_coding	Bruton agammaglobulinemia tyrosine kinase [Source:ZFIN;Acc:ZDB-GENE-070531-1]	Pkinase_Tyr	15	19	82	36	0.167616	0.185653	0.824263	0.383853
ENSDARG00000103235	69.5822	137.359	288.045	423.805	103.471	355.925	-1.77648	9.73326e-08	2.13323e-06	mfsd8	12	22628704	22645215	+	2907	protein_coding	major facilitator superfamily domain containing 8 [Source:ZFIN;Acc:ZDB-GENE-060818-29]	MFS_1	65	147	299	416	0.658126	1.30148	2.72329	4.01908
ENSDARG00000098256	24.6214	12.1474	40.4612	85.576	18.3844	63.0186	-1.78435	0.00571314	0.0316601	si:ch73-329n5.6	12	43730276	43819253	-	2503	protein_coding	si:ch73-329n5.6 [Source:ZFIN;Acc:ZDB-GENE-131121-171]	-	23	13	42	84	0.270463	0.133674	0.44428	0.942533
ENSDARG00000115610	122.037	175.67	517.325	512.437	148.853	514.881	-1.78634	5.06052e-14	2.58275e-12	ccl25a	2	53582357	53592532	-	5160	protein_coding	chemokine (C-C motif) ligand 25a [Source:ZFIN;Acc:ZDB-GENE-110222-1]	-	114	188	537	503	0.650273	0.937721	2.75545	2.73777
ENSDARG00000102375	35.3264	28.0324	121.384	96.7824	31.6794	109.083	-1.78762	6.59275e-05	0.00073572	si:ch211-204c21.1	5	43849529	43859166	-	2089	protein_coding	si:ch211-204c21.1 [Source:ZFIN;Acc:ZDB-GENE-030429-35]	-	33	30	126	95	0.464961	0.369614	1.59698	1.27721
ENSDARG00000110922	18.1984	18.6883	69.362	58.0694	18.4434	63.7157	-1.78855	0.0017049	0.0118092	CR847936.6	1	14522913	14533611	-	6710	protein_coding	-	THAP	17	20	72	57	0.0745705	0.0767137	0.284104	0.238578
ENSDARG00000003909	34.2559	50.4584	131.017	163.002	42.3571	147.01	-1.78963	7.69034e-06	0.00011188	ftr01	2	11670270	11677705	+	1968	protein_coding	finTRIM family, member 1 [Source:ZFIN;Acc:ZDB-GENE-070705-491]	zf-B_box	32	54	136	160	0.478592	0.70621	1.82971	2.28335
ENSDARG00000104392	20.3394	13.0818	63.5818	51.9569	16.7106	57.7693	-1.79639	0.00323444	0.0200334	eri2	1	58977262	58979451	+	1396	protein_coding	ERI1 exoribonuclease family member 2 [Source:ZFIN;Acc:ZDB-GENE-050522-292]	zf-GRF	19	14	66	51	0.400598	0.258112	1.25178	1.02604
ENSDARG00000056376	12.846	21.4915	78.9956	40.7505	17.1687	59.873	-1.79674	0.00488126	0.0279193	ankrd37	1	17695426	17698773	+	1076	protein_coding	ankyrin repeat domain 37 [Source:ZFIN;Acc:ZDB-GENE-070308-1]	-	12	23	82	40	0.328254	0.55015	2.01776	1.04406
ENSDARG00000023082	255.849	293.406	1066.44	845.572	274.627	956.007	-1.79853	1.55555e-21	1.81163e-19	krt1-19d	19	5324653	5332784	-	1371	protein_coding	keratin, type 1, gene 19d [Source:ZFIN;Acc:ZDB-GENE-060316-1]	Filament	239	314	1107	830	5.13099	5.89464	21.3785	17.0027
ENSDARG00000006029	268.695	185.948	799.59	779.353	227.321	789.471	-1.7997	5.81212e-18	4.82031e-16	lta4h	4	7653607	7673165	-	2183	protein_coding	leukotriene A4 hydrolase [Source:ZFIN;Acc:ZDB-GENE-040426-2477]	-	251	199	830	765	3.38424	2.3462	10.0668	9.84206
ENSDARG00000074575	47.1018	74.7531	237.95	188.471	60.9275	213.211	-1.80193	2.81035e-07	5.63485e-06	ppp1r9alb	1	31071708	31105376	-	5692	protein_coding	protein phosphatase 1 regulatory subunit 9A-like B [Source:ZFIN;Acc:ZDB-GENE-090312-99]	SAM_2	44	80	247	185	0.227525	0.361735	1.14895	0.91282
ENSDARG00000016290	40.6788	28.0324	137.761	101.876	34.3556	119.818	-1.80789	4.33131e-05	0.000509861	clca1	15	14109652	14120431	+	3412	protein_coding	chloride channel accessory 1 [Source:ZFIN;Acc:ZDB-GENE-030131-6221]	VWA	38	30	143	100	0.327805	0.226296	1.10967	0.823132
ENSDARG00000100185	71.7232	50.4584	160.881	266.916	61.0908	213.898	-1.81103	1.01685e-06	1.82043e-05	elovl7b	KN150589.1	3626	5397	-	849	protein_coding	ELOVL fatty acid elongase 7b [Source:ZFIN;Acc:ZDB-GENE-030131-5485]	ELO	67	54	167	262	2.32278	1.63701	5.20807	8.66706
ENSDARG00000069109	16.0574	14.0162	50.0948	56.0319	15.0368	53.0633	-1.82106	0.0035297	0.0214794	sssca1	10	26827113	26832044	+	955	protein_coding	Sjogren syndrome/scleroderma autoantigen 1 [Source:ZFIN;Acc:ZDB-GENE-041010-102]	-	15	15	52	55	0.462305	0.404253	1.44168	1.61748
ENSDARG00000041119	119.896	139.228	472.047	447.237	129.562	459.642	-1.82498	2.49699e-15	1.47363e-13	ceacam1	16	11724230	11760596	+	3793	protein_coding	carcinoembryonic antigen-related cell adhesion molecule 1 [Source:ZFIN;Acc:ZDB-GENE-010724-14]	I-set	112	149	490	439	0.869112	1.01104	3.42043	3.25057
ENSDARG00000070110	26.7624	20.5571	60.6918	106.97	23.6598	83.8309	-1.82753	0.00066483	0.00533399	opn5	20	35998073	36036696	+	1516	protein_coding	opsin 5 [Source:ZFIN;Acc:ZDB-GENE-041001-179]	7tm_1	25	22	63	105	0.48538	0.373498	1.1003	1.94522
ENSDARG00000032932	49.2428	49.5239	187.855	163.002	49.3834	175.429	-1.82901	2.33781e-07	4.75268e-06	cnksr1	17	26990531	27048640	-	2640	protein_coding	connector enhancer of kinase suppressor of Ras 1 [Source:ZFIN;Acc:ZDB-GENE-040426-1802]	PH	46	53	195	160	0.512855	0.516699	1.95568	1.70214
ENSDARG00000061858	365.039	534.485	1867.96	1339.67	449.762	1603.81	-1.83251	2.49395e-19	2.30401e-17	zgc:153968	3	21225750	21230668	+	1240	protein_coding	zgc:153968 [Source:ZFIN;Acc:ZDB-GENE-061027-211]	Trypsin	341	572	1939	1315	8.09419	11.8724	41.4023	29.784
ENSDARG00000045706	19.2689	13.0818	74.1788	40.7505	16.1754	57.4646	-1.83537	0.00408245	0.0242236	tspan9b	4	9696965	9722568	-	1883	protein_coding	tetraspanin 9b [Source:ZFIN;Acc:ZDB-GENE-040704-25]	Tetraspannin	18	14	77	40	0.28136	0.191356	1.0827	0.596607
ENSDARG00000008388	770.757	416.749	2140.59	2101.71	593.753	2121.15	-1.83747	1.73558e-05	0.000229195	mmp14b	2	38161318	38183641	+	4473	protein_coding	matrix metallopeptidase 14b (membrane-inserted) [Source:ZFIN;Acc:ZDB-GENE-030901-2]	Hemopexin	720	446	2222	2063	4.73777	2.56626	13.1526	12.9532
ENSDARG00000053068	149.869	128.015	499.984	492.062	138.942	496.023	-1.83805	1.93875e-16	1.31421e-14	cyp8b1	2	3435888	3437862	-	1975	protein_coding	cytochrome P450, family 8, subfamily B, polypeptide 1 [Source:ZFIN;Acc:ZDB-GENE-040808-53]	p450	140	137	519	483	2.08642	1.78533	6.95774	6.86844
ENSDARG00000077897	84.5692	94.3758	294.789	347.398	89.4725	321.093	-1.84165	1.51898e-11	5.92837e-10	znf296	18	36631923	36648298	+	3904	protein_coding	zinc finger protein 296 [Source:ZFIN;Acc:ZDB-GENE-050419-201]	-	79	101	306	341	0.595605	0.665851	2.07529	2.45314
ENSDARG00000104569	438.903	496.174	1571.24	1790.98	467.539	1681.11	-1.84499	6.18642e-35	1.78226e-32	CABZ01088484.1	18	1768804	1791127	+	1344	protein_coding	-	Glyco_hydro_31	410	531	1631	1758	8.97895	10.1686	32.1309	36.7365
ENSDARG00000090890	31.0444	42.9831	136.797	130.402	37.0137	133.599	-1.84717	6.37968e-06	9.48885e-05	cmklr1	5	20570573	20590795	+	1399	protein_coding	chemokine-like receptor 1 [Source:ZFIN;Acc:ZDB-GENE-060526-126]	7tm_1	29	46	142	128	0.610128	0.846263	2.68744	2.56963
ENSDARG00000105607	14.9869	23.3604	68.3986	70.2946	19.1736	69.3466	-1.84811	0.000979495	0.00741565	si:dkey-183c6.9	7	24002096	24005268	-	3173	protein_coding	si:dkey-183c6.9 [Source:ZFIN;Acc:ZDB-GENE-160728-24]	zf-B_box	14	25	71	69	0.129867	0.202785	0.592456	0.610741
ENSDARG00000053535	73.8642	79.4252	261.071	292.385	76.6447	276.728	-1.85093	1.2369e-10	4.29192e-09	lmo7b	1	34365845	34450784	-	6560	protein_coding	LIM domain 7b [Source:ZFIN;Acc:ZDB-GENE-060825-242]	CH	69	85	271	287	0.309589	0.333488	1.09379	1.22873
ENSDARG00000079964	24.6214	27.098	82.8491	104.932	25.8597	93.8908	-1.85832	0.000113271	0.00117004	dlx2a	9	3397407	3400729	-	1704	protein_coding	distal-less homeobox 2a [Source:ZFIN;Acc:ZDB-GENE-980526-212]	Homeobox	23	29	86	103	0.397282	0.43802	1.33628	1.69764
ENSDARG00000063553	22.4804	19.6227	75.1422	77.4259	21.0516	76.284	-1.8595	0.00040024	0.00344467	rlf	17	24590177	24602512	+	6342	protein_coding	rearranged L-myc fusion [Source:ZFIN;Acc:ZDB-GENE-050208-257]	-	21	21	78	76	0.0974617	0.0852233	0.325639	0.336562
ENSDARG00000111515	21.4099	20.5571	52.9849	99.8387	20.9835	76.4118	-1.86391	0.000945302	0.00719409	CABZ01061498.1	22	8380715	8388678	-	2626	protein_coding	-	V-set	20	22	55	98	0.224169	0.215622	0.554544	1.04812
ENSDARG00000019228	172.35	169.129	594.394	648.951	170.739	621.673	-1.86445	2.87095e-20	2.99737e-18	mogat2	10	32534814	32610776	-	2257	protein_coding	monoacylglycerol O-acyltransferase 2 [Source:ZFIN;Acc:ZDB-GENE-041010-186]	-	161	181	617	637	2.09959	2.06401	7.23805	7.92659
ENSDARG00000041540	153.081	79.4252	431.586	413.617	116.253	422.602	-1.86806	2.48287e-10	8.26178e-09	sult1st2	8	46513743	46525092	-	1622	protein_coding	sulfotransferase family 1, cytosolic sulfotransferase 2 [Source:ZFIN;Acc:ZDB-GENE-030804-27]	Sulfotransfer_1	143	85	448	406	2.59493	1.34876	7.31299	7.02997
ENSDARG00000013856	928.12	1084.85	4321.64	3030.82	1006.49	3676.23	-1.86848	3.37773e-30	6.91171e-28	amy2a	2	15612755	15626972	+	1698	protein_coding	amylase, alpha 2A (pancreatic) [Source:ZFIN;Acc:ZDB-GENE-040426-2393]	-	867	1161	4486	2975	15.0287	17.5979	69.9503	49.2071
ENSDARG00000103754	42.8198	52.3272	139.687	208.846	47.5735	174.267	-1.86969	9.54421e-07	1.72202e-05	aspm	22	23546926	23582605	+	10507	protein_coding	abnormal spindle microtubule assembly [Source:ZFIN;Acc:ZDB-GENE-050208-620]	CH	40	56	145	205	0.112053	0.137175	0.36539	0.547966
ENSDARG00000075491	41.7493	40.1798	117.53	182.358	40.9646	149.944	-1.87168	4.14776e-06	6.48216e-05	si:ch211-26b3.4	5	22871718	22952156	-	5450	protein_coding	si:ch211-26b3.4 [Source:ZFIN;Acc:ZDB-GENE-081104-60]	SAM_1	39	43	122	179	0.210625	0.203066	0.592695	0.922433
ENSDARG00000005786	8.56397	14.0162	43.3513	39.7317	11.2901	41.5415	-1.87225	0.00911467	0.0457195	ppm1f	5	13181029	13206878	-	1924	protein_coding	protein phosphatase, Mg2+/Mn2+ dependent, 1F [Source:ZFIN;Acc:ZDB-GENE-051128-2]	PP2C	8	15	45	39	0.122384	0.200656	0.619263	0.569296
ENSDARG00000075931	381.097	517.665	1645.42	1651.41	449.381	1648.42	-1.8727	1.13085e-29	2.2509e-27	acsl5	12	31438579	31461412	-	3793	protein_coding	acyl-CoA synthetase long chain family member 5 [Source:ZFIN;Acc:ZDB-GENE-040912-169]	AMP-binding	356	554	1708	1621	2.76254	3.75917	11.9227	12.0027
ENSDARG00000015314	39.6084	26.1636	44.3146	196.621	32.886	120.468	-1.8751	0.00198412	0.0133957	zc4h2	5	22073710	22082918	-	2052	protein_coding	zinc finger, C4H2 domain containing [Source:ZFIN;Acc:ZDB-GENE-030131-2207]	-	37	28	46	193	0.53072	0.351193	0.593538	2.64155
ENSDARG00000029822	337.206	549.436	1824.61	1441.55	443.321	1633.08	-1.87887	1.64624e-19	1.56715e-17	cel.2	21	11385031	11393979	+	1825	protein_coding	carboxyl ester lipase, tandem duplicate 2 [Source:ZFIN;Acc:ZDB-GENE-061110-10]	COesterase	315	588	1894	1415	5.08029	8.29239	27.478	21.7757
ENSDARG00000014003	76.0052	55.1304	250.474	232.278	65.5678	241.376	-1.88481	2.70794e-09	7.62086e-08	stard8	5	35786141	35867256	+	5965	protein_coding	StAR-related lipid transfer (START) domain containing 8 [Source:ZFIN;Acc:ZDB-GENE-030131-9447]	RhoGAP	71	59	260	228	0.350339	0.25457	1.15407	1.0735
ENSDARG00000113896	27.8329	65.409	208.086	138.552	46.6209	173.319	-1.88651	1.6436e-05	0.000218873	si:dkey-29p23.1	4	43648421	43676582	-	10841	protein_coding	si:dkey-29p23.1 [Source:ZFIN;Acc:ZDB-GENE-081103-27]	-	26	70	216	136	0.0705903	0.166186	0.527536	0.352329
ENSDARG00000099624	384.308	367.225	1364.12	1418.12	375.766	1391.12	-1.88879	4.54399e-37	1.53063e-34	chmp1b	5	23024033	23028214	+	1453	protein_coding	chromatin modifying protein 1B [Source:ZFIN;Acc:ZDB-GENE-030131-8370]	ESCRT-III	359	393	1416	1392	7.27226	6.96133	25.8027	26.9062
ENSDARG00000070454	118.825	125.211	432.549	472.706	122.018	452.627	-1.89032	3.43758e-16	2.26024e-14	pla2g12a	1	12061284	12064799	-	1599	protein_coding	phospholipase A2, group XIIA [Source:ZFIN;Acc:ZDB-GENE-070410-18]	-	111	134	449	464	2.04322	2.15686	7.43474	8.14982
ENSDARG00000096603	44.9608	38.311	147.394	163.002	41.6359	155.198	-1.90042	5.11206e-07	9.71602e-06	bmb	25	36292057	36310015	+	3148	protein_coding	brambleberry [Source:ZFIN;Acc:ZDB-GENE-030131-5577]	-	42	41	153	160	0.392695	0.335208	1.28684	1.42746
ENSDARG00000055342	54.5953	51.3928	187.855	207.827	52.994	197.841	-1.90114	1.56309e-08	3.93832e-07	slc16a13	7	20030888	20055983	+	5777	protein_coding	solute carrier family 16, member 13 (monocarboxylic acid transporter 13) [Source:ZFIN;Acc:ZDB-GENE-120907-2]	MFS_1	51	55	195	204	0.259842	0.245034	0.893717	0.991759
ENSDARG00000069018	310.444	347.602	1235.03	1226.59	329.023	1230.81	-1.90207	1.28059e-33	3.2603e-31	cyp7a1	2	22150134	22152797	-	1987	protein_coding	cytochrome P450, family 7, subfamily A, polypeptide 1 [Source:ZFIN;Acc:ZDB-GENE-040426-1296]	p450	290	372	1282	1204	4.29577	4.81848	17.0828	17.0179
ENSDARG00000023220	149.869	199.965	900.743	408.524	174.917	654.633	-1.90368	0.00125623	0.00915314	selenot2	14	17580571	17588345	-	2002	protein_coding	selenoprotein T, 2 [Source:ZFIN;Acc:ZDB-GENE-030411-4]	-	140	214	935	401	2.05828	2.75115	12.3656	5.62547
ENSDARG00000079605	29.9739	28.9668	89.5926	131.42	29.4704	110.506	-1.90652	3.29525e-05	0.000400163	prmt5	2	38342298	38363017	-	2459	protein_coding	protein arginine methyltransferase 5 [Source:ZFIN;Acc:ZDB-GENE-030616-585]	-	28	31	93	129	0.335151	0.324465	1.00136	1.47336
ENSDARG00000077372	320.078	425.158	1562.57	1235.76	372.618	1399.17	-1.90688	5.74226e-25	8.49506e-23	tfr1b	24	26017094	26031204	+	3097	protein_coding	transferrin receptor 1b [Source:ZFIN;Acc:ZDB-GENE-041220-2]	TFR_dimer	299	455	1622	1213	2.84165	3.78125	13.8668	11.0001
ENSDARG00000003069	114.543	77.5564	347.773	373.886	96.0497	360.83	-1.91423	4.10681e-12	1.703e-10	btbd7	20	27114874	27190393	-	3905	protein_coding	BTB (POZ) domain containing 7 [Source:ZFIN;Acc:ZDB-GENE-030131-4477]	BTB	107	83	361	367	0.806498	0.547044	2.44768	2.63951
ENSDARG00000056369	118.825	123.343	455.67	459.462	121.084	457.566	-1.91742	5.78739e-17	4.19586e-15	ufsp2	1	17699471	17711676	-	1964	protein_coding	ufm1-specific peptidase 2 [Source:ZFIN;Acc:ZDB-GENE-030131-8726]	DUF1671	111	132	473	451	1.6635	1.72981	6.37658	6.44931
ENSDARG00000002593	24.6214	33.6389	125.237	95.7636	29.1302	110.5	-1.91944	2.79374e-05	0.000345197	slc45a2	21	19445942	19484289	+	1745	protein_coding	solute carrier family 45, member 2 [Source:ZFIN;Acc:ZDB-GENE-050208-97]	-	23	36	130	94	0.387948	0.530973	1.97249	1.5129
ENSDARG00000060319	10.705	38.311	102.116	85.576	24.508	93.8461	-1.92451	0.000819557	0.00638584	scn4bb	5	37918810	37935621	-	1878	protein_coding	sodium channel, voltage-gated, type IV, beta b [Source:ZFIN;Acc:ZDB-GENE-031116-71]	V-set	10	41	106	84	0.156728	0.561893	1.49444	1.25621
ENSDARG00000096908	164.856	199.03	700.364	687.664	181.943	694.014	-1.92912	3.80417e-22	4.73251e-20	si:ch73-185c24.2	6	34028532	34036231	+	1161	protein_coding	si:ch73-185c24.2 [Source:ZFIN;Acc:ZDB-GENE-131121-189]	-	154	213	727	675	3.90418	4.72186	16.5795	16.3286
ENSDARG00000100621	115.614	331.717	833.307	872.06	223.665	852.684	-1.92976	0.00539239	0.0302806	CABZ01080550.1	25	8269947	8292650	+	4530	protein_coding	-	VWD	108	355	865	856	0.701724	2.01695	5.05575	5.30706
ENSDARG00000061355	886.371	1036.27	3681	3664.49	961.318	3672.74	-1.93273	2.6111e-56	1.84419e-53	aoc1	24	40001290	40009446	-	2639	protein_coding	amine oxidase, copper containing 1 [Source:ZFIN;Acc:ZDB-GENE-061103-112]	-	828	1109	3821	3597	9.23489	10.8158	38.3359	38.2807
ENSDARG00000073961	61.0183	55.1304	226.39	218.015	58.0744	222.202	-1.93753	1.27191e-09	3.77862e-08	si:ch211-160j14.2	21	32052080	32060993	-	833	protein_coding	si:ch211-160j14.2 [Source:ZFIN;Acc:ZDB-GENE-091118-113]	-	57	59	235	214	2.01405	1.82294	7.46949	7.21518
ENSDARG00000094265	12.846	14.9506	54.9116	51.9569	13.8983	53.4342	-1.94054	0.00209884	0.0140403	si:dkey-183n20.15	20	25473056	25486384	-	1342	protein_coding	si:dkey-183n20.15 [Source:ZFIN;Acc:ZDB-GENE-041001-160]	-	12	16	57	51	0.26319	0.306855	1.12458	1.06732
ENSDARG00000090481	48.1723	29.9013	143.541	154.852	39.0368	149.196	-1.94089	1.55749e-06	2.66804e-05	tusc5a	15	24845145	24869826	-	2704	protein_coding	tumor suppressor candidate 5a [Source:ZFIN;Acc:ZDB-GENE-131121-306]	-	45	32	149	152	0.489831	0.304585	1.45897	1.57876
ENSDARG00000091249	11.7755	31.7701	77.0689	91.6886	21.7728	84.3787	-1.94208	0.000598231	0.00488013	CR381686.1	24	20032331	20054257	-	1667	transcribed_unprocessed_pseudogene	-	Sugar_tr	11	34	80	90	0.194222	0.524939	1.27064	1.5163
ENSDARG00000099525	165.927	231.735	573.2	962.73	198.831	767.965	-1.94669	6.93754e-14	3.51614e-12	si:ch1073-13h15.3	12	3220285	3237561	-	1845	protein_coding	si:ch1073-13h15.3 [Source:ZFIN;Acc:ZDB-GENE-121214-245]	Amino_oxidase	155	248	595	945	2.47273	3.45956	8.53864	14.3851
ENSDARG00000109235	26.7624	43.9175	125.237	148.739	35.3399	136.988	-1.94744	4.38481e-06	6.80406e-05	CABZ01103862.1	KN150633.1	21	4198	+	988	protein_coding	-	-	25	47	130	146	0.744773	1.22435	3.48381	4.15025
ENSDARG00000076923	37.4674	20.5571	112.713	112.064	29.0122	112.389	-1.96223	2.62247e-05	0.000327174	kazna	8	26714532	26792912	-	2910	protein_coding	kazrin, periplakin interacting protein a [Source:ZFIN;Acc:ZDB-GENE-081105-97]	SAM_1	35	22	117	110	0.35401	0.194579	1.06454	1.06164
ENSDARG00000075441	19.2689	44.8519	128.127	124.289	32.0604	126.208	-1.96669	2.77017e-05	0.000342671	vwa2	12	30312308	30345444	-	2470	protein_coding	von Willebrand factor A domain containing 2 [Source:ZFIN;Acc:ZDB-GENE-100302-1]	VWA	18	48	133	122	0.214495	0.500161	1.42568	1.38721
ENSDARG00000093304	112.402	79.4252	327.543	422.786	95.9136	375.165	-1.97154	2.3114e-12	9.82681e-11	si:dkey-221j11.3	13	42544009	42551434	+	1949	protein_coding	si:dkey-221j11.3 [Source:ZFIN;Acc:ZDB-GENE-090313-247]	-	105	85	340	415	1.58569	1.12246	4.61886	5.98018
ENSDARG00000044942	20.3394	15.885	87.6659	53.9944	18.1122	70.8301	-1.97206	0.000636767	0.00514845	mrpl45	11	12096199	12104917	-	1041	protein_coding	mitochondrial ribosomal protein L45 [Source:ZFIN;Acc:ZDB-GENE-040426-1041]	-	19	17	91	53	0.537209	0.420304	2.31451	1.42989
ENSDARG00000029356	29.9739	58.8681	152.211	199.677	44.421	175.944	-1.97727	1.1659e-06	2.06532e-05	mboat1	16	6395311	6424818	-	2243	protein_coding	membrane bound O-acyltransferase domain containing 1 [Source:ZFIN;Acc:ZDB-GENE-041114-98]	MBOAT	28	63	158	196	0.367426	0.722897	1.86507	2.45417
ENSDARG00000092018	20.3394	5.60648	56.8383	44.8255	12.973	50.8319	-1.9861	0.0062084	0.0338338	si:ch211-139a5.1	5	37981800	37989179	-	1019	protein_coding	si:ch211-139a5.1 [Source:ZFIN;Acc:ZDB-GENE-060526-39]	-	19	6	59	44	0.548808	0.151545	1.53301	1.21271
ENSDARG00000104311	62.0888	65.409	213.866	293.403	63.7489	253.635	-1.99098	4.5174e-10	1.44603e-08	scmh1	16	35555029	35586411	-	5672	protein_coding	Scm polycomb group protein homolog 1 [Source:ZFIN;Acc:ZDB-GENE-070410-82]	MBT	58	70	222	288	0.300976	0.317634	1.0363	1.42605
ENSDARG00000002968	304.021	227.063	918.083	1196.03	265.542	1057.05	-1.99531	6.89582e-23	8.98715e-21	a1cf	12	6160446	6177894	-	2584	protein_coding	apobec1 complementation factor [Source:ZFIN;Acc:ZDB-GENE-060824-3]	RRM_1	284	243	953	1174	3.23494	2.42035	9.76491	12.7601
ENSDARG00000017886	23.5509	13.0818	79.959	65.2008	18.3164	72.5799	-1.99558	0.000466983	0.00394011	zbtb11	6	29144776	29159888	-	4583	protein_coding	zinc finger and BTB domain containing 11 [Source:ZFIN;Acc:ZDB-GENE-030131-5055]	BTB	22	14	83	64	0.141291	0.0786219	0.479508	0.392201
ENSDARG00000086504	21.4099	12.1474	86.7025	47.8818	16.7787	67.2922	-2.01279	0.00110982	0.00825111	BX323559.1	2	32701820	32707411	+	456	processed_transcript	-	-	20	13	90	47	1.29094	0.733743	5.22571	2.89475
ENSDARG00000058822	9.63446	13.0818	27.9375	64.182	11.3581	46.0597	-2.01387	0.0064069	0.0346454	wnt3a	2	3106237	3158919	-	1098	protein_coding	wingless-type MMTV integration site family, member 3A [Source:ZFIN;Acc:ZDB-GENE-001106-1]	wnt	9	14	29	63	0.241258	0.328164	0.6993	1.61145
ENSDARG00000090618	124.178	164.457	600.174	570.507	144.317	585.34	-2.01653	1.24486e-19	1.20603e-17	malrd1	7	41632928	41693004	-	8462	protein_coding	MAM and LDL receptor class A domain containing 1 [Source:ZFIN;Acc:ZDB-GENE-140106-257]	Ldl_recept_a	116	176	623	560	0.403483	0.535309	1.94932	1.85863
ENSDARG00000100476	35.3264	35.5077	153.174	133.458	35.4171	143.316	-2.0169	3.83713e-07	7.46317e-06	si:dkeyp-110c7.4	5	37068223	37074101	+	1783	protein_coding	si:dkeyp-110c7.4 [Source:ZFIN;Acc:ZDB-GENE-070705-532]	-	33	38	159	131	0.544758	0.548526	2.3611	2.06347
ENSDARG00000053853	1415.2	1596.91	6604.8	5599.12	1506.05	6101.96	-2.01805	5.08615e-61	4.12449e-58	slc13a2	21	39100289	39118502	+	2595	protein_coding	solute carrier family 13 (sodium-dependent dicarboxylate transporter), member 2 [Source:ZFIN;Acc:ZDB-GENE-040426-2389]	Na_sulph_symp	1322	1709	6856	5496	14.9946	16.95	69.9522	59.4823
ENSDARG00000040812	10.705	15.885	47.2047	61.1257	13.295	54.1652	-2.01968	0.00175663	0.0121062	ncf4	22	29204885	29252049	+	2216	protein_coding	neutrophil cytosolic factor 4 [Source:ZFIN;Acc:ZDB-GENE-041124-1]	PX	10	17	49	60	0.132822	0.197444	0.585456	0.760431
ENSDARG00000114704	12.846	16.8195	52.0215	69.2758	14.8327	60.6487	-2.02676	0.000891372	0.00684553	FP016205.1	22	898131	910926	-	1266	protein_coding	-	-	12	18	54	68	0.27899	0.365935	1.12935	1.50853
ENSDARG00000019763	14.9869	30.8357	43.3513	144.664	22.9113	94.0077	-2.02832	0.00130083	0.00944041	acp5a	6	8355122	8362516	-	1974	protein_coding	acid phosphatase 5a, tartrate resistant [Source:ZFIN;Acc:ZDB-GENE-040426-2864]	Metallophos	14	33	45	142	0.208748	0.430261	0.603578	2.02032
ENSDARG00000113433	6.42298	20.5571	50.0948	61.1257	13.49	55.6102	-2.02843	0.0032341	0.0200334	zgc:158316	KZ116018.1	8110	10986	+	1493	protein_coding	zgc:158316 [Source:ZFIN;Acc:ZDB-GENE-061215-98]	-	6	22	52	60	0.118286	0.379252	0.922171	1.12868
ENSDARG00000029720	11.7755	52.3272	150.284	115.12	32.0513	132.702	-2.03785	0.000209478	0.00199327	si:dkeyp-9d4.2	1	8017069	8020589	-	1418	protein_coding	si:dkeyp-9d4.2 [Source:ZFIN;Acc:ZDB-GENE-090312-156]	-	11	56	156	113	0.228327	1.01643	2.91284	2.23811
ENSDARG00000092745	12.846	14.0162	45.278	65.2008	13.4311	55.2394	-2.03793	0.00143115	0.0102235	ftr37	2	59339650	59345920	-	1566	protein_coding	finTRIM family, member 37 [Source:ZFIN;Acc:ZDB-GENE-070912-486]	zf-B_box	12	15	47	64	0.225543	0.246527	0.794647	1.1478
ENSDARG00000103590	63.1593	117.736	369.931	377.961	90.4477	373.946	-2.04087	1.37677e-11	5.41191e-10	FP015919.1	23	42316065	42330488	+	1804	unprocessed_pseudogene	-	p450	59	126	384	371	0.962623	1.79763	5.63589	5.77585
ENSDARG00000073847	23.5509	19.6227	87.6659	89.6511	21.5868	88.6585	-2.04107	4.53083e-05	0.000530212	rbm15	8	24788499	24791060	-	2562	protein_coding	RNA binding motif protein 15 [Source:ZFIN;Acc:ZDB-GENE-041008-192]	RRM_1	22	21	91	88	0.252746	0.210963	0.940438	0.964677
ENSDARG00000022767	8926.87	9692.68	38409.2	38241.3	9309.77	38325.2	-2.04137	1.64228e-112	3.99529e-109	apobb.1	20	31269778	31285980	+	12857	protein_coding	apolipoprotein Bb, tandem duplicate 1 [Source:ZFIN;Acc:ZDB-GENE-030131-9732]	Vitellogenin_N	8339	10373	39870	37537	19.0904	20.7649	82.1059	81.9971
ENSDARG00000022631	27.8329	26.1636	105.97	117.158	26.9982	111.564	-2.04773	4.84879e-06	7.4449e-05	cyp2p9	20	25581627	25584869	+	2328	protein_coding	cytochrome P450, family 2, subfamily P, polypeptide 9 [Source:ZFIN;Acc:ZDB-GENE-040120-2]	p450	26	28	110	115	0.328724	0.309557	1.25106	1.38737
ENSDARG00000089079	9.63446	9.34414	53.9482	24.4503	9.4893	39.1993	-2.04842	0.00911037	0.0457195	si:ch211-214b16.3	3	60285115	60308937	-	4893	protein_coding	si:ch211-214b16.3 [Source:ZFIN;Acc:ZDB-GENE-081105-50]	NACHT	9	10	56	24	0.0541387	0.0526005	0.303027	0.137757
ENSDARG00000097559	11.7755	10.2786	45.278	45.8443	11.027	45.5611	-2.04903	0.00298486	0.0187851	cyp8b3	2	3468069	3470019	+	1951	protein_coding	cytochrome P450, family 8, subfamily B, polypeptide 3 [Source:ZFIN;Acc:ZDB-GENE-040912-153]	p450	11	11	47	45	0.16595	0.145111	0.637835	0.647789
ENSDARG00000037746	11474.6	12386.6	46954.2	52118.8	11930.6	49536.5	-2.05374	4.28153e-100	8.52219e-97	actb1	1	8649099	8653385	-	2890	protein_coding	actin, beta 1 [Source:ZFIN;Acc:ZDB-GENE-000329-1]	Actin	10719	13256	48740	51159	109.168	118.054	446.535	497.167
ENSDARG00000040747	633.734	692.401	3067.34	2459.29	663.067	2763.32	-2.05873	4.78949e-46	2.38332e-43	tm4sf4	22	38127467	38137908	-	2044	protein_coding	transmembrane 4 L six family member 4 [Source:ZFIN;Acc:ZDB-GENE-040801-231]	-	592	741	3184	2414	8.52475	9.33045	41.2439	33.1692
ENSDARG00000075053	10.705	20.5571	64.5452	67.2383	15.631	65.8917	-2.06569	0.000580449	0.00474922	SCCPDH (1 of many)	17	12138715	12156014	+	1859	protein_coding	zgc:174379 [Source:ZFIN;Acc:ZDB-GENE-080212-12]	Saccharop_dh	10	22	67	66	0.158329	0.304585	0.954253	0.99711
ENSDARG00000078452	10.705	13.0818	50.0948	49.9193	11.8934	50.0071	-2.0686	0.00179192	0.0123068	hmox2b	3	11958592	11972516	-	1231	protein_coding	heme oxygenase 2b [Source:ZFIN;Acc:ZDB-GENE-091118-52]	-	10	14	52	49	0.239102	0.292708	1.11844	1.11793
ENSDARG00000092521	78.1462	64.4746	280.338	317.854	71.3104	299.096	-2.07109	7.87148e-13	3.56824e-11	jac1	7	8415494	8417315	-	1337	protein_coding	jacalin 1 [Source:ZFIN;Acc:ZDB-GENE-030131-8429]	-	73	69	291	312	1.60706	1.32826	5.76275	6.55393
ENSDARG00000078285	28.9034	11.213	67.4353	99.8387	20.0582	83.637	-2.07135	0.000361633	0.00316261	pik3ap1	13	23093743	23131912	+	8106	protein_coding	phosphoinositide-3-kinase adaptor protein 1 [Source:ZFIN;Acc:ZDB-GENE-090313-250]	-	27	12	70	98	0.0980388	0.0381013	0.228644	0.339545
ENSDARG00000044528	312.585	544.763	2067.37	1538.33	428.674	1802.85	-2.07171	2.62496e-06	4.26678e-05	slc15a1b	6	12556427	12588044	-	2631	protein_coding	solute carrier family 15 (oligopeptide transporter), member 1b [Source:ZFIN;Acc:ZDB-GENE-030131-4661]	-	292	583	2146	1510	3.26665	5.70313	21.5962	16.1189
ENSDARG00000114695	110.261	92.507	423.879	427.88	101.384	425.879	-2.07321	2.41986e-17	1.86445e-15	hmox2a	22	26853254	26865361	-	6194	protein_coding	heme oxygenase 2a [Source:ZFIN;Acc:ZDB-GENE-040914-13]	-	103	99	440	420	0.489448	0.411367	1.88083	1.90439
ENSDARG00000079765	19.2689	11.213	66.4719	61.1257	15.2409	63.7988	-2.07433	0.00058299	0.00476645	si:ch211-112f3.4	11	37905630	37923887	+	2888	protein_coding	si:ch211-112f3.4 [Source:ZFIN;Acc:ZDB-GENE-141219-9]	-	18	12	69	60	0.183449	0.106942	0.632586	0.583489
ENSDARG00000102241	94.2037	63.5402	315.019	347.398	78.8719	331.208	-2.07536	8.26007e-13	3.72895e-11	zgc:136410	21	44505613	44512893	-	842	protein_coding	zgc:136410 [Source:ZFIN;Acc:ZDB-GENE-060421-6071]	-	88	68	327	341	3.07618	2.07856	10.2826	11.3742
ENSDARG00000101356	3.21149	27.098	67.4353	62.1445	15.1547	64.7899	-2.07887	0.00520274	0.0294352	CABZ01044156.1	3	58984463	58989816	+	2501	protein_coding	-	NACHT	3	29	70	61	0.035306	0.298435	0.741058	0.685006
ENSDARG00000101906	6.42298	12.1474	40.4612	38.713	9.28518	39.5871	-2.08198	0.00607494	0.0332694	zgc:113442	6	1769905	1777831	-	1371	protein_coding	zgc:113442 [Source:ZFIN;Acc:ZDB-GENE-050227-2]	-	6	13	42	38	0.128811	0.244046	0.81111	0.778439
ENSDARG00000114142	83.4987	128.015	437.366	464.555	105.757	450.961	-2.08683	1.39348e-15	8.5224e-14	si:dkeyp-4f2.1	4	71691806	71904377	-	11659	protein_coding	si:dkeyp-4f2.1 [Source:ZFIN;Acc:ZDB-GENE-081103-33]	SPRY	78	137	454	456	0.196913	0.30243	1.03101	1.09845
ENSDARG00000095217	148.799	332.651	932.534	1117.58	240.725	1025.06	-2.08921	0.000197943	0.00190003	zgc:66156	22	225937	237651	-	1698	protein_coding	zgc:66156 [Source:ZFIN;Acc:ZDB-GENE-040426-1554]	Myosin_head	139	356	968	1097	2.40945	5.39607	15.094	18.1446
ENSDARG00000009402	25.6919	36.4422	112.713	152.814	31.067	132.764	-2.08955	1.52938e-06	2.62633e-05	si:ch211-210b2.2	15	665156	669476	-	3133	protein_coding	si:ch211-210b2.2 [Source:ZFIN;Acc:ZDB-GENE-131118-33]	-	24	39	117	150	0.225471	0.320383	0.988766	1.34465
ENSDARG00000068995	155.222	147.637	559.713	732.49	151.43	646.101	-2.09334	3.00555e-21	3.40966e-19	h2afx1	10	29816681	29817589	+	909	protein_coding	H2A histone family member X1 [Source:ZFIN;Acc:ZDB-GENE-041010-42]	Histone	145	158	581	719	4.6951	4.47361	16.9231	22.2148
ENSDARG00000094560	17.1279	14.9506	81.8857	55.0131	16.0393	68.4494	-2.09645	0.000339753	0.00300021	BX005254.2	23	36150430	36154411	+	1002	lincRNA	-	-	16	16	85	54	0.469995	0.410977	2.24605	1.51358
ENSDARG00000029930	6.42298	10.2786	40.4612	31.5816	8.35077	36.0214	-2.10166	0.00795264	0.0412125	SPDEF	6	54280365	54290227	-	978	protein_coding	SAM pointed domain containing ETS transcription factor [Source:HGNC Symbol;Acc:HGNC:17257]	Ets	6	11	42	31	0.180573	0.28948	1.13705	0.890228
ENSDARG00000038713	25.6919	51.3928	146.431	187.452	38.5423	166.942	-2.10548	4.82541e-07	9.22728e-06	tep1	2	37897079	37906118	+	1747	protein_coding	telomerase-associated protein 1 [Source:ZFIN;Acc:ZDB-GENE-030131-6153]	-	24	55	152	184	0.404352	0.81028	2.30366	2.95803
ENSDARG00000077836	66.3708	73.8187	244.694	361.661	70.0947	303.177	-2.11073	1.08692e-11	4.32693e-10	ttc22	6	30668098	30676074	+	2090	protein_coding	tetratricopeptide repeat domain 22 [Source:ZFIN;Acc:ZDB-GENE-050208-292]	-	62	79	254	355	0.873145	0.97285	3.21777	4.77046
ENSDARG00000090903	20.3394	32.7045	164.735	65.2008	26.522	114.968	-2.11165	9.8961e-05	0.00104472	creb3l3b	2	52847049	52904765	+	1868	protein_coding	cAMP responsive element binding protein 3-like 3b [Source:ZFIN;Acc:ZDB-GENE-131023-1]	bZIP_1	19	35	171	64	0.299376	0.482232	2.42375	0.962236
ENSDARG00000070368	12.846	12.1474	88.6292	19.3565	12.4967	53.9929	-2.1137	0.00695714	0.036874	casp6l2	3	32969204	32973554	-	1806	protein_coding	caspase 6, apoptosis-related cysteine peptidase, like 2 [Source:ZFIN;Acc:ZDB-GENE-060312-12]	Peptidase_C14	12	13	92	19	0.195571	0.185264	1.34877	0.295471
ENSDARG00000039392	429.269	347.602	1619.41	1739.03	388.435	1679.22	-2.11407	4.64234e-42	1.8823e-39	wnk1b	4	8045564	8155571	-	11790	protein_coding	WNK lysine deficient protein kinase 1b [Source:ZFIN;Acc:ZDB-GENE-030131-2656]	Pkinase	401	372	1681	1707	1.00109	0.812072	3.77504	4.06629
ENSDARG00000039116	117.755	77.5564	421.952	420.749	97.6555	421.35	-2.11472	2.04215e-15	1.22837e-13	nr5a5	3	53457192	53465249	-	2163	protein_coding	nuclear receptor subfamily 5, group A, member 5 [Source:ZFIN;Acc:ZDB-GENE-030131-4652]	Hormone_recep	110	83	438	413	1.49685	0.987613	5.36149	5.36256
ENSDARG00000090901	43.8903	31.7701	141.614	185.415	37.8302	163.514	-2.11621	8.12442e-08	1.80593e-06	si:ch211-256e16.11	3	58197025	58205045	-	2625	protein_coding	si:ch211-256e16.11 [Source:ZFIN;Acc:ZDB-GENE-131127-41]	-	41	34	147	182	0.459722	0.333361	1.48271	1.94724
ENSDARG00000067664	24.6214	23.3604	102.116	105.951	23.9909	104.034	-2.11731	5.51245e-06	8.34683e-05	si:dkey-172m14.2	5	49002612	49012569	-	3241	protein_coding	si:dkey-172m14.2 [Source:ZFIN;Acc:ZDB-GENE-060526-222]	-	23	25	106	104	0.208877	0.19853	0.865954	0.901224
ENSDARG00000058459	110.261	156.047	547.189	612.276	133.154	579.733	-2.1178	1.36944e-19	1.32087e-17	plekhg2	15	20281305	20352045	+	9220	protein_coding	pleckstrin homology domain containing, family G (with RhoGef domain) member 2 [Source:ZFIN;Acc:ZDB-GENE-090819-1]	RhoGEF	103	167	568	601	0.328812	0.466177	1.63112	1.83072
ENSDARG00000093708	10.705	12.1474	58.765	40.7505	11.4262	49.7578	-2.12123	0.00176921	0.0121852	arhgap20b	5	22264051	22327098	+	2212	protein_coding	Rho GTPase activating protein 20b [Source:ZFIN;Acc:ZDB-GENE-060526-383]	-	10	13	61	40	0.133063	0.15126	0.730151	0.507871
ENSDARG00000055100	272.976	164.457	967.215	934.205	218.717	950.71	-2.12438	9.96508e-22	1.18579e-19	cxcl12b	22	26929554	26945493	-	2844	protein_coding	chemokine (C-X-C motif) ligand 12b (stromal cell-derived factor 1) [Source:ZFIN;Acc:ZDB-GENE-030721-1]	-	255	176	1004	917	2.63907	1.59275	9.347	9.05562
ENSDARG00000007560	70.6527	65.409	296.715	297.479	68.0309	297.097	-2.12791	8.04987e-14	4.03322e-12	sema3bl	8	26522013	26573963	+	3253	protein_coding	sema domain, immunoglobulin domain (Ig), short basic domain, secreted, (semaphorin) 3bl [Source:ZFIN;Acc:ZDB-GENE-030131-2956]	Sema	66	70	308	292	0.597174	0.553834	2.50689	2.52102
ENSDARG00000071652	14.9869	42.9831	122.347	134.477	28.985	128.412	-2.13495	1.63514e-05	0.000217902	rrp8	15	15221123	15230264	-	2357	protein_coding	ribosomal RNA processing 8, methyltransferase, homolog (yeast) [Source:ZFIN;Acc:ZDB-GENE-030131-8898]	-	14	46	127	132	0.174827	0.5023	1.42663	1.57287
ENSDARG00000059361	80.2872	58.8681	285.155	327.023	69.5776	306.089	-2.14159	4.43276e-13	2.06941e-11	slc39a4	19	1119416	1127722	-	1646	protein_coding	solute carrier family 39 (zinc transporter), member 4 [Source:ZFIN;Acc:ZDB-GENE-060315-8]	-	75	63	296	321	1.34113	0.98509	4.76135	5.47714
[truncated: 437 more rows]

## Sheet: 1 year DEGS
gene_id	col9_1year_4	col9_1year_6	col9_1year_5	wt_1year_3	wt_1year_4	wt_1year_5	col9_1_year	wt_1_year	log2FoldChange	pvalue	padj	gene_name	gene_chr	gene_start	gene_end	gene_strand	gene_length	gene_biotype	gene_description	tf_family	col9_1year_4_count	col9_1year_6_count	col9_1year_5_count	wt_1year_3_count	wt_1year_4_count	wt_1year_5_count	col9_1year_4_fpkm	col9_1year_6_fpkm	col9_1year_5_fpkm	wt_1year_3_fpkm	wt_1year_4_fpkm	wt_1year_5_fpkm
[truncated: 568 more rows]
