# Supplementary material for: Targeted modulation of phosphate and lipid metabolism reduces ligament mineralization in col9a1b knockout models
Source: Research Square preprint supplement (doi:10.21203/rs.3.rs-7082517/v1), 2025-07-22
Supplement: Supplementary file 1 [file 78a86754e3ac469a5157dd49.pdf]

# Targeted modulation of phosphate and lipid metabolism reduces ligament mineralization in *col9a1b* knockout models

**Authors:** Erika Kague<sup>1,2\*</sup>, Beatriz Larraz-Prieto<sup>2</sup>, Renata A. Racle<sup>1</sup>, Joanna Moss<sup>1</sup>, and Chrissy L Hammond<sup>1\*</sup>

## Supplementary Material

### Figures:

**Supplementary Figure 1. Bone quality impairment in *col9a1b* mutants.** A) PicroSirius Red staining in wt and *col9a1b* mutants. B, C and D) Quantification of mean values for red pixels (B), green pixels (C) and blue pixels (D). Dots in the graphs represent two measurements in n=3 samples. Nonparametric T-tests and Mann-Whitney test. All significant p values are as indicated. Scale Bars= 50um.

**Supplementary Figure 2. Increased glycosaminoglycans in *col9a1b* forming vertebral column.** Whole-mount Alcian blue staining of wt and *col9a1b*<sup>-/-</sup>. Dashed lines show where the chordacentra is formed. Note the increased alcian blue signal in mutants. Scale Bars = 100µm.

### Tables:

**Supplementary Table 1. DEGs of 15dpf and 1year old wt and *col9a1b* mutants.**

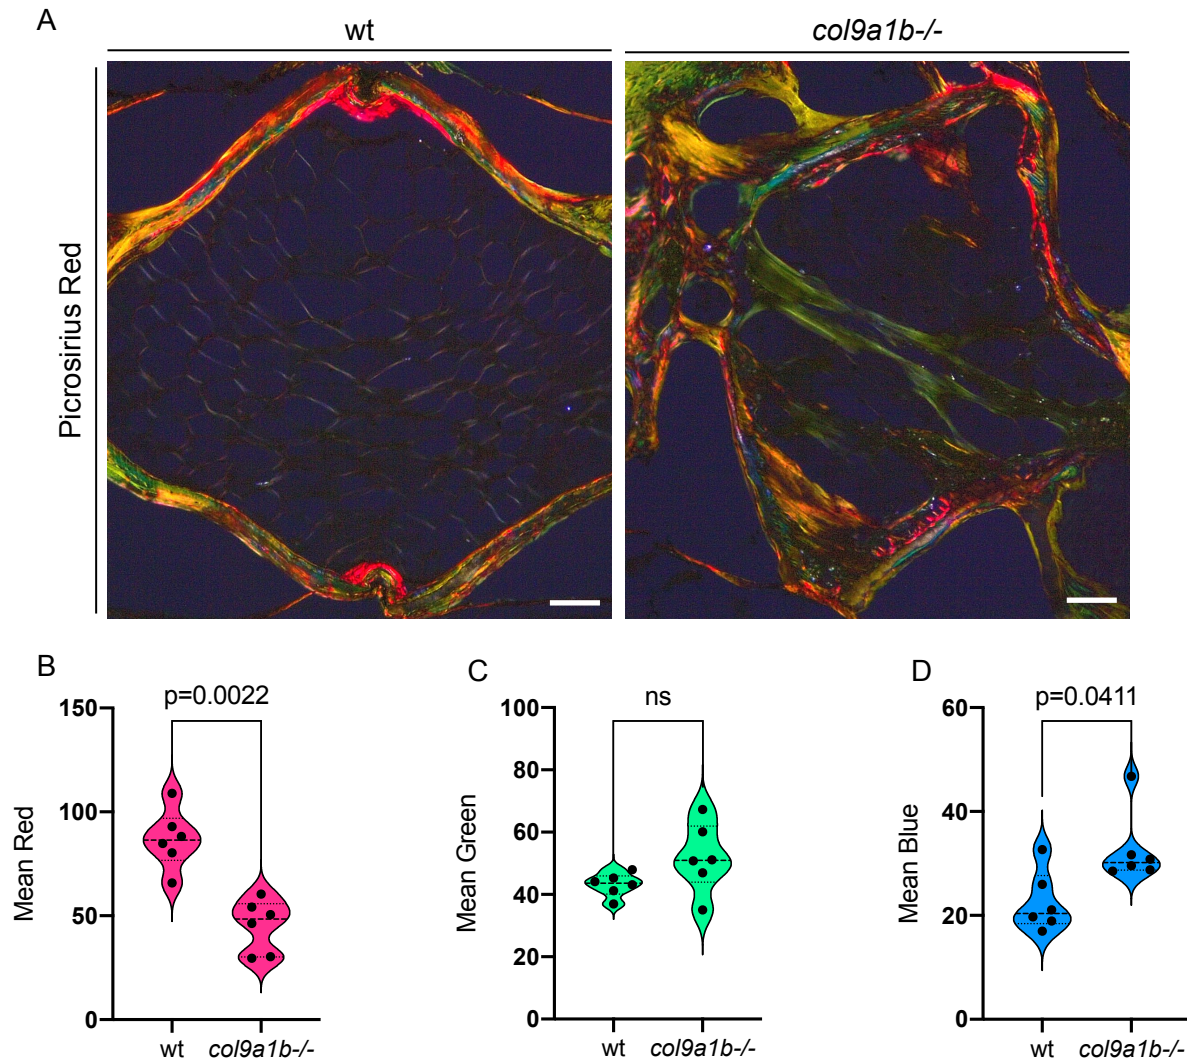

**Supplementary Figure 1. Bone quality impairment in *col9a1b* mutants.** A) PicroSirius Red staining in wt and *col9a1b* mutants. B, C and D) Quantification of mean values for red pixels (B), green pixels (C) and blue pixels (D). Dots in the graphs represent two measurements in n=3 samples. Nonparametric T-tests and Mann-Whitney test. All significant p values are as indicated. Scale Bars= 50um.

Alcian Blue

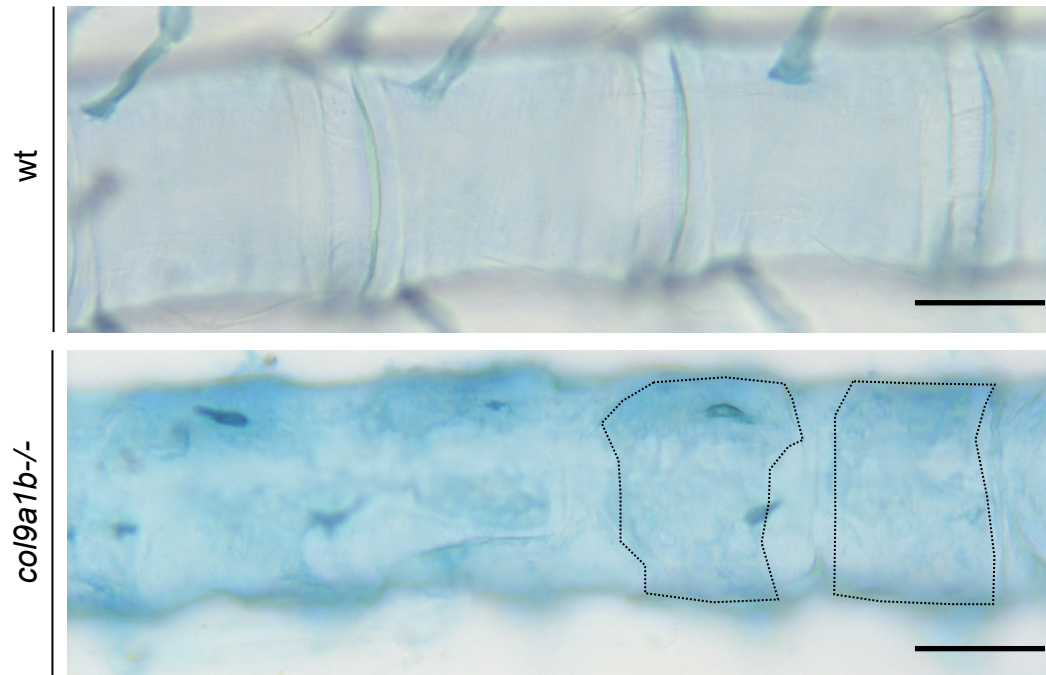

**Supplementary Figure 2. Increased glycosaminoglycans in *col9a1b* forming vertebral column.** Whole-mount Alcian blue staining of wt and *col9a1b*<sup>-/-</sup>. Dashed lines show where the chordacentra is formed. Note the increased alcian blue signal in mutants. Scale Bars = 100μm.
